# Supplementary material for: Single-cell analysis uncovers that metabolic reprogramming by ErbB2 signaling is essential for cardiomyocyte proliferation in the regenerating heart
Source: eLife. 2019 Dec 23;8:e50163. doi: 10.7554/eLife.50163 (PMC7000220; doi:10.7554/eLife.50163)
Supplement: Figure 1—source data 2. [file elife-50163-fig1-data2.xlsx]

## Sheet: cell_clust
CELLID	cluster
FK.1_2	1
FK.1_50	1
FK.1_57	1
FK.1_68	1
FK.1_94	1
FK.1_102	1
FK.1_106	1
FK.1_112	1
FK.1_146	1
FK.1_173	1
FK.1_195	1
FK.1_200	1
FK.1_205	1
FK.1_210	1
FK.1_220	1
FK.1_223	1
FK.1_225	1
FK.1_226	1
FK.1_243	1
FK.1_285	1
FK.1_334	1
FK.1_338	1
FK.1_373	1
FK.2_2	1
FK.2_5	1
FK.2_17	1
FK.2_26	1
FK.2_37	1
FK.2_44	1
FK.2_45	1
FK.2_57	1
FK.2_64	1
FK.2_71	1
FK.2_75	1
FK.2_77	1
FK.2_95	1
FK.2_98	1
FK.2_99	1
FK.2_100	1
FK.2_107	1
FK.2_122	1
FK.2_179	1
FK.2_191	1
FK.2_196	1
FK.2_211	1
FK.2_215	1
FK.2_225	1
FK.2_226	1
FK.2_243	1
FK.2_246	1
FK.2_265	1
FK.2_274	1
FK.2_275	1
FK.2_277	1
FK.2_281	1
FK.2_291	1
FK.2_309	1
FK.2_338	1
FK.2_340	1
FK.2_351	1
FK.2_370	1
FK.2_375	1
FK.2_378	1
FK.1_3	2
FK.1_5	2
FK.1_6	2
FK.1_14	2
FK.1_27	2
FK.1_34	2
FK.1_36	2
FK.1_44	2
FK.1_46	2
FK.1_67	2
FK.1_75	2
FK.1_93	2
FK.1_95	2
FK.1_98	2
FK.1_99	2
FK.1_100	2
FK.1_111	2
FK.1_113	2
FK.1_116	2
FK.1_117	2
FK.1_124	2
FK.1_126	2
FK.1_129	2
FK.1_130	2
FK.1_139	2
FK.1_167	2
FK.1_169	2
FK.1_177	2
FK.1_189	2
FK.1_190	2
FK.1_214	2
FK.1_217	2
FK.1_218	2
FK.1_232	2
FK.1_236	2
FK.1_247	2
FK.1_280	2
FK.1_295	2
FK.1_296	2
FK.1_303	2
FK.1_304	2
FK.1_324	2
FK.1_326	2
FK.1_336	2
FK.1_348	2
FK.1_368	2
FK.1_371	2
FK.1_375	2
FK.1_377	2
FK.2_39	2
FK.2_42	2
FK.2_46	2
FK.2_51	2
FK.2_67	2
FK.2_68	2
FK.2_70	2
FK.2_91	2
FK.2_93	2
FK.2_116	2
FK.2_119	2
FK.2_125	2
FK.2_129	2
FK.2_137	2
FK.2_172	2
FK.2_175	2
FK.2_183	2
FK.2_188	2
FK.2_194	2
FK.2_208	2
FK.2_220	2
FK.2_222	2
FK.2_229	2
FK.2_232	2
FK.2_234	2
FK.2_248	2
FK.2_270	2
FK.2_271	2
FK.2_285	2
FK.2_287	2
FK.2_288	2
FK.2_294	2
FK.2_295	2
FK.2_297	2
FK.2_298	2
FK.2_300	2
FK.2_303	2
FK.2_306	2
FK.2_307	2
FK.2_310	2
FK.2_325	2
FK.2_326	2
FK.2_327	2
FK.2_330	2
FK.2_331	2
FK.2_344	2
FK.2_364	2
FK.2_365	2
FK.2_368	2
FK.2_374	2
FK.1_18	3
FK.2_13	3
FK.2_85	3
FK.2_198	3
FK.2_272	3
FK.2_352	3
FK.1_10	4
FK.1_25	4
FK.1_119	4
FK.1_143	4
FK.1_194	4
FK.1_196	4
FK.1_211	4
FK.1_221	4
FK.1_242	4
FK.1_252	4
FK.1_260	4
FK.1_284	4
FK.1_299	4
FK.1_307	4
FK.1_318	4
FK.2_1	4
FK.2_3	4
FK.2_8	4
FK.2_19	4
FK.2_25	4
FK.2_34	4
FK.2_35	4
FK.2_47	4
FK.2_48	4
FK.2_50	4
FK.2_58	4
FK.2_59	4
FK.2_94	4
FK.2_147	4
FK.2_153	4
FK.2_167	4
FK.2_199	4
FK.2_205	4
FK.2_223	4
FK.2_235	4
FK.2_242	4
FK.2_320	4
FK.2_324	4
FK.2_336	4
FK.2_350	4
FK.2_371	4
FK.1_12	5
FK.1_19	5
FK.1_31	5
FK.1_59	5
FK.1_62	5
FK.1_65	5
FK.1_72	5
FK.1_91	5
FK.1_125	5
FK.1_323	5
FK.1_369	5
FK.2_32	5
FK.2_66	5
FK.2_123	5
FK.2_135	5
FK.2_139	5
FK.2_333	5
FK.2_347	5
FK.2_353	5
FK.2_366	5
FK.1_15	6
FK.1_23	6
FK.1_32	6
FK.1_47	6
FK.1_74	6
FK.1_82	6
FK.1_88	6
FK.1_89	6
FK.1_90	6
FK.1_92	6
FK.1_140	6
FK.1_171	6
FK.1_244	6
FK.1_248	6
FK.1_269	6
FK.1_273	6
FK.1_279	6
FK.1_291	6
FK.1_293	6
FK.1_313	6
FK.1_372	6
FK.2_15	6
FK.2_33	6
FK.2_36	6
FK.2_52	6
FK.2_55	6
FK.2_63	6
FK.2_74	6
FK.2_78	6
FK.2_106	6
FK.2_113	6
FK.2_140	6
FK.2_149	6
FK.2_218	6
FK.2_256	6
FK.2_258	6
FK.2_264	6
FK.2_286	6
FK.1_22	7
FK.1_30	7
FK.1_212	7
FK.1_215	7
FK.1_262	7
FK.1_263	7
FK.1_272	7
FK.1_275	7
FK.1_300	7
FK.1_317	7
FK.1_340	7
FK.1_363	7
FK.2_12	7
FK.2_14	7
FK.2_16	7
FK.2_30	7
FK.2_53	7
FK.2_54	7
FK.2_96	7
FK.2_111	7
FK.2_128	7
FK.2_146	7
FK.2_157	7
FK.2_166	7
FK.2_181	7
FK.2_182	7
FK.2_189	7
FK.2_195	7
FK.2_202	7
FK.2_214	7
FK.2_217	7
FK.2_227	7
FK.2_237	7
FK.2_241	7
FK.2_244	7
FK.2_245	7
FK.2_255	7
FK.2_260	7
FK.2_262	7
FK.2_304	7
FK.2_311	7
FK.2_313	7
FK.2_321	7
FK.2_323	7
FK.2_329	7
FK.2_373	7
FK.1_35	8
FK.1_77	8
FK.1_107	8
FK.1_147	8
FK.1_164	8
FK.1_175	8
FK.1_208	8
FK.1_240	8
FK.1_292	8
FK.2_9	8
FK.2_41	8
FK.2_101	8
FK.2_136	8
FK.2_177	8
FK.2_209	8
FK.2_283	8
FK.2_316	8
FK.2_322	8
FK.1_42	9
FK.1_73	9
FK.1_276	9
FK.2_40	9
FK.2_56	9
FK.2_253	9
FK.2_296	9
FK.1_33	10
FK.1_37	10
FK.1_40	10
FK.1_137	10
FK.1_213	10
FK.1_239	10
FK.1_256	10
FK.1_301	10
FK.1_354	10
FK.2_348	10
FK.1_8	11
FK.1_101	11
FK.1_153	11
FK.1_306	12
