# Supplementary material for: Single-cell analysis uncovers that metabolic reprogramming by ErbB2 signaling is essential for cardiomyocyte proliferation in the regenerating heart
Source: eLife. 2019 Dec 23;8:e50163. doi: 10.7554/eLife.50163 (PMC7000220; doi:10.7554/eLife.50163)
Supplement: Figure 1—source data 3. — Only genes with a p-value<0.05 are listed. Per gene, the log2 fold change, adjusted p-value (padj) and associated gene name are given. GO-terms for genes upregulated between clusters 2 and 7 (p<0.01) are listed in separate excel sheets. [file elife-50163-fig1-data3.xlsx]

## Sheet: Diff. Gene Cl7vsCl2
GeneID	log2FoldChange	padj	Associated.Gene.Name
ENSDARG00000079564	4.89975	1.60782e-36	vmhc
ENSDARG00000000563	4.8101	4.22551e-71	ttnb
ENSDARG00000079782	4.49142	6.11844e-76	vmhcl
ENSDARG00000028213	4.45804	1.58573e-72	ttna
ENSDARG00000018566	4.22604	4.95158e-24	flnca
ENSDARG00000030722	4.08652	4.65638e-24	xirp1
ENSDARG00000009341	3.98026	1.4589e-14	NRAP
ENSDARG00000052708	3.94031	4.46992e-29	tnni1b
ENSDARG00000089086	3.9299	1.85919e-15	MUSTN1
ENSDARG00000042535	3.91996	3.53418e-36	actc1a
ENSDARG00000045180	3.91834	1.76269e-13	acta2
ENSDARG00000052958	3.80111	1.25725e-27	BX323876.2
ENSDARG00000002204	3.7577	3.91359e-27	hspb11
ENSDARG00000062350	3.74149	2.00697e-13	synm
ENSDARG00000013422	3.69344	3.93178e-14	slc8a1a
ENSDARG00000089418	3.6699	8.33295e-15	wu:fk66f10
ENSDARG00000069975	3.64364	7.84444e-16	csrp3
ENSDARG00000021193	3.62079	3.68712e-13	coro1cb
ENSDARG00000071113	3.61628	1.28236e-12	xirp2a
ENSDARG00000002791	3.61066	2.00697e-13	atp1a1a.1
ENSDARG00000021987	3.5894	2.1047e-17	plecb
ENSDARG00000011538	3.5783	1.8075e-23	hspb7
ENSDARG00000011615	3.55778	8.7755e-29	mybpc3
ENSDARG00000017772	3.55084	7.01937e-17	mdh1aa
ENSDARG00000011400	3.52958	4.30319e-26	tnnc1a
ENSDARG00000076126	3.52642	2.40136e-22	hm:zewp0073
ENSDARG00000062236	3.44602	1.3493e-15	ndrg4
ENSDARG00000041065	3.4331	2.02158e-19	hspb1
ENSDARG00000022101	3.42943	1.42373e-11	OBSCN (1 of 2)
ENSDARG00000003046	3.40125	8.29748e-15	sorbs2a
ENSDARG00000038123	3.37734	5.18297e-11	myl9a
ENSDARG00000079230	3.36495	3.62433e-18	sorbs1
ENSDARG00000069404	3.3524	2.98147e-22	si:ch211-260o22.1
ENSDARG00000052960	3.34706	3.21745e-21	nppa
ENSDARG00000067848	3.30869	4.57357e-10	nmrk2
ENSDARG00000023963	3.30373	4.94355e-28	tpm4a
ENSDARG00000019644	3.27932	3.22175e-16	ldhba
ENSDARG00000020610	3.2758	2.09689e-26	tnnt2a
ENSDARG00000071498	3.25913	3.3075e-14	fhl1a
ENSDARG00000095351	3.23978	9.2433e-36	si:ch73-308b14.1
ENSDARG00000057911	3.23927	2.96045e-17
ENSDARG00000045408	3.23923	5.46982e-09	tagln
ENSDARG00000035256	3.23559	1.22496e-11	eef2l2
ENSDARG00000008030	3.23425	9.81844e-14	myl9b
ENSDARG00000054588	3.22731	1.83218e-16	cox6a2
ENSDARG00000068738	3.22549	1.52482e-12	cox5b2
ENSDARG00000018693	3.22189	2.9366e-10	cdh2
ENSDARG00000041182	3.2167	4.92958e-11	rpl4
ENSDARG00000059259	3.2167	4.92958e-11	pabpc4
ENSDARG00000053484	3.20137	4.92958e-11	syne2b
ENSDARG00000062416	3.20123	4.09622e-13	scn4ba
ENSDARG00000057317	3.19819	2.48767e-10	nexn
ENSDARG00000076821	3.19397	3.22736e-08	MYOM1 (2 of 2)
ENSDARG00000058656	3.19347	5.13481e-14	desma
ENSDARG00000020845	3.18018	4.55233e-10	tns1
ENSDARG00000077777	3.17484	2.38084e-19	tmsb4x
ENSDARG00000036371	3.16624	6.78527e-14	acta1a
ENSDARG00000035136	3.16194	4.49488e-10	sepw1
ENSDARG00000044092	3.15341	7.36453e-09	atpif1b
ENSDARG00000075433	3.13338	2.78082e-11	CR847973.1
ENSDARG00000045864	3.10579	6.71664e-13	lmod2b
ENSDARG00000071090	3.10293	5.33153e-20	actn2
ENSDARG00000070083	3.09067	5.46767e-18	ATP5B
ENSDARG00000006497	3.08658	1.52681e-09	rtn1a
ENSDARG00000030490	3.07961	3.8965e-08	sptb
ENSDARG00000013144	3.07717	4.40716e-14	atp1b1a
ENSDARG00000008880	3.07232	1.99291e-07	usp28
ENSDARG00000060796	3.06492	3.56877e-09	slc20a2
ENSDARG00000034470	3.03939	2.03656e-12	aldoab
ENSDARG00000014967	3.03506	1.89504e-09	g6pcb
ENSDARG00000032976	3.03062	1.25725e-27	cmlc1
ENSDARG00000003795	3.02551	1.3493e-15	IDH2
ENSDARG00000056499	3.01938	1.03524e-07	ca6
ENSDARG00000007294	3.0122	4.33038e-09	aco2
ENSDARG00000007823	3.01208	2.14318e-08	atf3
ENSDARG00000055075	3.00557	5.90482e-08	svila
ENSDARG00000060457	3.00136	1.32601e-08	pmp22b
ENSDARG00000092553	3.00066	7.02591e-10	slc25a5
ENSDARG00000055618	2.98289	1.4747e-16	acta1b
ENSDARG00000019096	2.98078	3.57851e-28	myl7
ENSDARG00000008982	2.97953	1.29096e-08	casq2
ENSDARG00000040778	2.97916	3.1696e-07	ralba
ENSDARG00000003706	2.973	7.82364e-09	ryr2b
ENSDARG00000058548	2.9717	3.25879e-08	bves
ENSDARG00000013623	2.96706	6.4987e-12	vdac2
ENSDARG00000079578	2.96613	2.00697e-13	rbpms2b
ENSDARG00000069608	2.94768	4.11071e-10	palm2
ENSDARG00000078696	2.94751	9.59896e-12	synpo2lb
ENSDARG00000011553	2.94547	1.67214e-10	atp5f1
ENSDARG00000025566	2.94194	1.6517e-12	slc25a3b
ENSDARG00000042874	2.93269	1.46132e-08	phlda2
ENSDARG00000006316	2.93092	7.49129e-09	rpl23a
ENSDARG00000088030	2.92712	8.2779e-10	rpl35a
ENSDARG00000017246	2.92555	1.13377e-07	prx
ENSDARG00000040009	2.92555	1.13377e-07	palld
ENSDARG00000011665	2.92278	2.36566e-17	aldoaa
ENSDARG00000000103	2.89547	7.74839e-07	myh10
ENSDARG00000090375	2.89547	7.74839e-07	BX001033.2
ENSDARG00000016687	2.89056	9.59896e-12	acadvl
ENSDARG00000086230	2.88167	3.35345e-07	tmem176l.1
ENSDARG00000001788	2.88129	5.76504e-11	atp5o
ENSDARG00000031952	2.88043	1.42496e-25	mb
ENSDARG00000012388	2.87858	2.33956e-12	CU855779.1
ENSDARG00000095533	2.87631	1.79361e-06	si:ch211-198c19.3
ENSDARG00000077236	2.865	7.00451e-10	hspb6
ENSDARG00000043371	2.86257	2.00697e-13	mdh2
ENSDARG00000025635	2.86229	8.5352e-12	atp5h
ENSDARG00000011405	2.85838	3.76125e-10	rps9
ENSDARG00000007320	2.85499	6.08364e-10	rpl7
ENSDARG00000043453	2.85397	3.01178e-10	rps5
ENSDARG00000038577	2.85311	1.05925e-10	cox6c
ENSDARG00000028027	2.84855	5.18673e-08	trim63
ENSDARG00000031756	2.84155	1.06701e-08	mef2aa
ENSDARG00000079634	2.84033	1.66089e-06	filip1b
ENSDARG00000029064	2.83357	1.00769e-07	uqcrq
ENSDARG00000056108	2.83174	2.94107e-09	ndufa4
ENSDARG00000058365	2.81674	2.7233e-07	hspb8
ENSDARG00000029500	2.81657	2.94107e-09	rpl34
ENSDARG00000057556	2.81657	2.94107e-09	C21H18orf32
ENSDARG00000017591	2.81334	6.79282e-06	fat1a
ENSDARG00000093448	2.81334	6.79282e-06	mpc1
ENSDARG00000078842	2.81144	4.96538e-07	TNS1 (2 of 2)
ENSDARG00000046119	2.8112	3.01178e-10	rps3
ENSDARG00000051783	2.81058	8.55085e-13	rplp0
ENSDARG00000010149	2.80854	1.81707e-13	atp5a1
ENSDARG00000086945	2.80414	3.39844e-07	C12H10orf71 (1 of 2)
ENSDARG00000045886	2.79501	2.57639e-06	slc38a2
ENSDARG00000029439	2.78978	9.00429e-16	atp2a2a
ENSDARG00000037860	2.78283	1.38643e-09	cox6b2
ENSDARG00000022995	2.78205	1.13377e-07	clic4
ENSDARG00000058041	2.78144	1.09848e-06	ndufa8
ENSDARG00000045514	2.78111	1.10131e-10	atp5c1
ENSDARG00000053382	2.7758	1.37094e-08	cox7c
ENSDARG00000020850	2.76894	4.29e-18	eef1a1l1
ENSDARG00000034270	2.76664	4.76177e-07	ogdha
ENSDARG00000028533	2.76507	5.92485e-09	macf1
ENSDARG00000009447	2.76487	2.00697e-13	atp5g3b
ENSDARG00000096144	2.76379	9.14143e-15	si:dkey-196n19.8
ENSDARG00000001803	2.7599	2.41246e-06	kcnh6
ENSDARG00000096145	2.75504	1.60337e-06	si:dkey-111b14.2
ENSDARG00000030585	2.75424	1.06701e-08	rpl13
ENSDARG00000015490	2.75216	7.82364e-09	rpl24
ENSDARG00000032970	2.75158	3.74301e-12	cox4i1
ENSDARG00000023062	2.74711	7.07457e-07	cyr61
ENSDARG00000041435	2.74593	5.4249e-10	uba52
ENSDARG00000038075	2.74092	4.59732e-07	cyc1
ENSDARG00000014690	2.73383	7.94997e-11	rps4x
ENSDARG00000045230	2.73189	1.00607e-07	cox6b1
ENSDARG00000022456	2.73017	5.04347e-09	eno1a
ENSDARG00000061242	2.73012	7.28972e-08	tuft1a
ENSDARG00000077291	2.72969	3.86268e-12	rps2
ENSDARG00000057571	2.71952	3.72372e-06	pgam2
ENSDARG00000054817	2.71474	8.5346e-07	ppp1r14c
ENSDARG00000028343	2.70276	5.46982e-09	zgc:101560
ENSDARG00000015551	2.70058	1.02327e-09	fth1a
ENSDARG00000068992	2.70058	1.02327e-09	hspa8
ENSDARG00000045302	2.68915	1.97439e-08	smpx
ENSDARG00000013317	2.68773	2.0984e-06	pygmb
ENSDARG00000059128	2.68773	2.0984e-06	uqcrh
ENSDARG00000005673	2.68729	3.45832e-06	f3b
ENSDARG00000056119	2.67296	3.20122e-08	eef1g
ENSDARG00000010516	2.67234	4.30189e-08	rpl21
ENSDARG00000027600	2.67096	8.12384e-08	pdlim5b
ENSDARG00000044562	2.65973	2.01342e-08	cycsb
ENSDARG00000042931	2.6571	4.13149e-06	mibp2
ENSDARG00000002271	2.65481	7.0009e-06	zfand5b
ENSDARG00000015385	2.65219	1.20875e-05	ndufs3
ENSDARG00000069464	2.64978	9.42006e-09	cox7a1
ENSDARG00000023797	2.64561	2.32e-05	ryr1b
ENSDARG00000090096	2.64561	2.32e-05	sgcg
ENSDARG00000068940	2.64472	3.04281e-08	atp5ib
ENSDARG00000039576	2.64325	2.29371e-08	fstl1b
ENSDARG00000018820	2.64139	4.06349e-05	flncb
ENSDARG00000035400	2.63313	1.64469e-08	btf3
ENSDARG00000037393	2.6258	3.91904e-06	slc43a1a
ENSDARG00000027249	2.62326	5.13276e-08	btg1
ENSDARG00000062082	2.62134	6.64614e-06	hipk3b
ENSDARG00000083950	2.62103	4.43276e-07	snoU83B
ENSDARG00000035692	2.61899	5.30639e-09	rps3a
ENSDARG00000023290	2.61264	3.61951e-09	fabp3
ENSDARG00000076667	2.61175	6.29215e-08	ccng1
ENSDARG00000090618	2.61027	2.05471e-05	DIET1
ENSDARG00000015862	2.60912	4.97424e-08	rpl5b
ENSDARG00000046157	2.60898	1.44551e-08	RPS17 (2 of 2)
ENSDARG00000058451	2.60889	5.91799e-09	rpl6
ENSDARG00000029150	2.60876	8.87169e-10	hsp90ab1
ENSDARG00000041589	2.60497	3.0989e-06	adprhl1
ENSDARG00000024143	2.60329	2.1136e-05	mgst3
ENSDARG00000021443	2.60198	6.07321e-07	zfp36l1b
ENSDARG00000004757	2.595	3.62814e-05	ybx1
ENSDARG00000089920	2.595	3.62814e-05	CU571255.1
ENSDARG00000020133	2.58635	5.13276e-08	jdp2
ENSDARG00000037350	2.58635	5.13276e-08	rpl9
ENSDARG00000021838	2.58551	1.13377e-07	rps23
ENSDARG00000070849	2.58413	2.40538e-08	rps15
ENSDARG00000003016	2.58199	1.05925e-10	eef2b
ENSDARG00000000796	2.57947	1.02474e-06	nr4a1
ENSDARG00000027087	2.57931	2.38027e-05	tgfb2
ENSDARG00000054864	2.57618	2.96493e-06	aplp2
ENSDARG00000092873	2.5728	3.13264e-07	zgc:193541
ENSDARG00000007412	2.5611	7.70615e-06	slc2a1b
ENSDARG00000019332	2.5611	7.70615e-06	C24H11orf65
ENSDARG00000027744	2.55913	2.14173e-09	gadd45ba
ENSDARG00000019202	2.55714	1.52681e-09	ldb3b
ENSDARG00000005513	2.54706	0.000161742	naca
ENSDARG00000058105	2.53847	2.12876e-09	rpl36a
ENSDARG00000043257	2.53526	2.41446e-06	ckbb
ENSDARG00000096003	2.53526	2.41446e-06	USMG5
ENSDARG00000092807	2.53118	1.66731e-10	si:dkey-151g10.6
ENSDARG00000028396	2.52843	5.13276e-08	fkbp5
ENSDARG00000024276	2.52762	1.61967e-05	PCBP4
ENSDARG00000078293	2.52655	3.74677e-06	rbm24a
ENSDARG00000076075	2.52402	1.25514e-07	myh7ba
ENSDARG00000053457	2.51882	9.8719e-08	rpl23
ENSDARG00000052712	2.51598	2.77755e-05	suclg1
ENSDARG00000019230	2.51476	7.43622e-05	rpl7a
ENSDARG00000079092	2.51476	7.43622e-05	gprc5c
ENSDARG00000056322	2.50809	7.11751e-06	ldb3a
ENSDARG00000036329	2.50255	4.93221e-05	ndufa1
ENSDARG00000056008	2.49792	2.03192e-07	atp5g1
ENSDARG00000010113	2.49775	1.18523e-05	ndufb8
ENSDARG00000061688	2.49775	1.18523e-05	arvcfb
ENSDARG00000002084	2.49748	0.000145346	lamb2
ENSDARG00000075017	2.49748	0.000145346	polr2m
ENSDARG00000053058	2.49574	2.39438e-07	rps11
ENSDARG00000010784	2.48688	8.89287e-05	ppp1r12a
ENSDARG00000039452	2.48617	1.21833e-05	hk1
ENSDARG00000071691	2.47908	2.6092e-05	uqcrc2b
ENSDARG00000035327	2.47826	5.76504e-11	ckma
ENSDARG00000043531	2.47728	1.60624e-06	jun
ENSDARG00000043509	2.47544	2.00516e-07	rpl11
ENSDARG00000016721	2.4731	2.02087e-05	sdha
ENSDARG00000020893	2.46836	1.15167e-05	slc25a22
ENSDARG00000087303	2.46836	1.15167e-05	cebpd
ENSDARG00000095897	2.46401	1.56459e-07	atp5e
ENSDARG00000054191	2.45888	4.43548e-07	pgk1
ENSDARG00000055996	2.45825	3.37707e-05	rps8a
ENSDARG00000055723	2.45569	3.01178e-10	hsp70l
ENSDARG00000028546	2.45487	1.17565e-05	ndufs1
ENSDARG00000079198	2.45487	1.17565e-05	usp13
ENSDARG00000039641	2.44896	3.18978e-08	rpl26
ENSDARG00000002552	2.44613	0.000213637	mapkapk2a
ENSDARG00000062054	2.44613	0.000353895	CPT1A (2 of 2)
ENSDARG00000036629	2.44577	7.8845e-08	rps14
ENSDARG00000036174	2.44357	4.14363e-08	rpl14
ENSDARG00000087704	2.4433	8.15351e-05	gfra3
ENSDARG00000070212	2.44249	7.13983e-27	zgc:158463
ENSDARG00000041068	2.43652	5.58067e-06	got2a
ENSDARG00000039347	2.42544	2.73688e-07	rps24
ENSDARG00000042566	2.42517	5.4072e-07	rps7
ENSDARG00000009830	2.42462	1.67749e-06	hdlbpa
ENSDARG00000042620	2.42462	1.67749e-06	zgc:162356
ENSDARG00000058688	2.42288	3.57468e-05	adipor2
ENSDARG00000012987	2.42227	3.19754e-05	gpia
ENSDARG00000012409	2.42148	0.000105169	rnf207b
ENSDARG00000042905	2.41895	1.13377e-07	rpl10a
ENSDARG00000076892	2.41762	7.22166e-09	nme2b.2
ENSDARG00000035871	2.40801	6.74592e-07	rpl30
ENSDARG00000061794	2.40535	6.33523e-05	jam3b
ENSDARG00000019404	2.40374	2.12139e-06	atp5d
ENSDARG00000087802	2.40233	5.46899e-05	CABZ01080590.1
ENSDARG00000023298	2.40187	3.85161e-06	rps27.1
ENSDARG00000019702	2.3971	8.41911e-06	aldocb
ENSDARG00000003216	2.39629	2.94261e-07	anxa2a
ENSDARG00000055854	2.39398	1.60519e-05	nr4a3
ENSDARG00000079617	2.39398	1.60519e-05	zgc:101560
ENSDARG00000019181	2.39065	8.23107e-07	rpsa
ENSDARG00000005423	2.39016	3.40836e-05	pgam1a
ENSDARG00000039486	2.38571	2.6212e-07	bag3
ENSDARG00000054818	2.38567	5.9137e-07	rpl32
ENSDARG00000012244	2.37917	9.67581e-05	ube2e3
ENSDARG00000001975	2.37901	4.95605e-06	hsd11b2
ENSDARG00000018334	2.37618	8.13919e-07	rpl35
ENSDARG00000020153	2.37458	1.99291e-07	rps18
ENSDARG00000006290	2.37085	0.000231818	ndufs5
ENSDARG00000045490	2.37085	0.000231818	NDUFB2
ENSDARG00000018119	2.37025	6.02358e-05	cox5ab
ENSDARG00000054907	2.37025	6.02358e-05	cox7a3
ENSDARG00000014571	2.36993	1.60039e-05	ctnnb1
ENSDARG00000055475	2.36993	1.60039e-05	rps27.2
ENSDARG00000045487	2.36561	2.11234e-06	rps16
ENSDARG00000069615	2.36236	0.000126535	ckmt2a
ENSDARG00000042904	2.35935	9.88288e-06	foxo3b
ENSDARG00000042853	2.35908	0.000662073	ivd
ENSDARG00000015128	2.35789	2.59975e-06	rpl27
ENSDARG00000020876	2.35669	6.53019e-05	PDK2 (1 of 2)
ENSDARG00000021195	2.35263	2.57549e-05	st8sia6
ENSDARG00000075914	2.35263	2.57549e-05	kcnj14
ENSDARG00000032725	2.34907	8.00639e-08	rps27a
ENSDARG00000007682	2.34445	3.61468e-05	ppdpfa
ENSDARG00000010478	2.34445	3.61468e-05	hsp90aa1.1
ENSDARG00000013343	2.33761	0.000792948	kif26ba
ENSDARG00000019117	2.33761	0.000792948	parvb
ENSDARG00000051886	2.33761	0.000792948	ankrd11
ENSDARG00000056856	2.33761	0.000792948	tax1bp1b
ENSDARG00000071331	2.33761	0.000792948	ryr3
ENSDARG00000075132	2.33558	0.000233118	fh
ENSDARG00000043467	2.33427	0.000116365	ndufb11
ENSDARG00000054942	2.33427	0.000116365	lgals2a
ENSDARG00000075768	2.33427	0.000116365	sdhb
ENSDARG00000078989	2.33336	2.96842e-05	alpk3a
ENSDARG00000031683	2.3311	2.00088e-11	fos
ENSDARG00000040856	2.3309	1.31092e-06	ldha
ENSDARG00000092362	2.32675	2.24562e-08	hsp70.2
ENSDARG00000006691	2.32125	0.000117841	rpl12
ENSDARG00000016651	2.3195	0.000354765	znf106a
ENSDARG00000017006	2.3195	0.000354765	dennd5a
ENSDARG00000077506	2.3195	0.000354765	tjp1a
ENSDARG00000011841	2.31716	3.14153e-07	atp5l
ENSDARG00000020107	2.31174	7.12876e-05	usp2a
ENSDARG00000021372	2.30861	0.000215903	tob1b
ENSDARG00000008398	2.30206	4.0504e-05	cacna1c
ENSDARG00000014313	2.30112	1.21574e-05	atp5j
ENSDARG00000088673	2.29813	1.33574e-07	CT956064.5
ENSDARG00000094815	2.29768	2.76444e-05	si:ch73-49p17.1
ENSDARG00000026801	2.29456	7.84243e-06	stau2
ENSDARG00000005451	2.29063	0.000216836	gdi2
ENSDARG00000014915	2.29063	0.000216836	ndufab1b
ENSDARG00000007745	2.29045	1.66714e-05	uqcrfs1
ENSDARG00000017219	2.28772	7.85647e-07	pabpc1a
ENSDARG00000038076	2.28731	0.000124832	ROMO1
ENSDARG00000012709	2.28012	0.000726502	agla
ENSDARG00000084962	2.27898	2.10081e-09	BX296557.2
ENSDARG00000038608	2.27894	0.000408866	sdhc
ENSDARG00000061579	2.27894	0.000408866	myo1c
ENSDARG00000039256	2.27826	6.79146e-05	speg
ENSDARG00000052304	2.27826	6.79146e-05	uqcrc1
ENSDARG00000096655	2.27826	6.79146e-05	si:ch211-184m19.3
ENSDARG00000038900	2.27782	4.53276e-05	acadm
ENSDARG00000021864	2.27407	7.8845e-08	rplp1
ENSDARG00000088371	2.2722	5.58067e-06	junbb
ENSDARG00000015887	2.27014	6.75198e-07	b2ml
ENSDARG00000074120	2.27007	8.07349e-05	USP2 (2 of 3)
ENSDARG00000031698	2.26865	0.000203382	mylk2
ENSDARG00000063682	2.26865	0.000203382	FHOD3 (2 of 2)
ENSDARG00000053136	2.26626	1.5592e-07	b2m
ENSDARG00000020298	2.26402	5.38686e-07	btg2
ENSDARG00000030408	2.26218	3.18373e-07	rps26l
ENSDARG00000057147	2.2595	0.000224738	hadhb
ENSDARG00000045485	2.25444	0.000408866	rassf8b
ENSDARG00000056141	2.25444	0.000408866	coq10b
ENSDARG00000061819	2.25444	0.000408866	wscd2
ENSDARG00000073952	2.25444	0.000408866	SLC4A7
ENSDARG00000005791	2.25191	9.22355e-06	rpl28
ENSDARG00000009106	2.24424	0.000798373	serinc1
ENSDARG00000058693	2.23735	7.71645e-05	cast
ENSDARG00000018393	2.23535	0.000386812	kank2
ENSDARG00000042644	2.23535	0.000386812	sod2
ENSDARG00000043795	2.23535	0.000386812	arhgdia
ENSDARG00000025428	2.23358	6.29215e-08	socs3a
ENSDARG00000035860	2.23133	9.11408e-06	rps28
ENSDARG00000037266	2.23133	0.000128789	myoz2b
ENSDARG00000095765	2.23133	0.000128789	si:ch1073-221c23.2
ENSDARG00000036044	2.22377	4.70422e-06	rps20
ENSDARG00000041811	2.2232	1.02474e-06	rps25
ENSDARG00000036875	2.22104	1.8353e-06	rps12
ENSDARG00000096508	2.22062	0.000213637	si:ch211-265g21.1
ENSDARG00000003684	2.22025	0.00198432	obsl1a
ENSDARG00000042533	2.22025	0.00198432	gstm
ENSDARG00000054458	2.22025	0.00198432	slmapa
ENSDARG00000042247	2.21718	2.10725e-05	ppiab
ENSDARG00000012381	2.21444	0.000243652	hsc70
ENSDARG00000044462	2.21444	0.000243652	qkia
ENSDARG00000059054	2.21444	0.000243652	pdk2
ENSDARG00000007098	2.20889	0.000130501	itm2ba
ENSDARG00000015050	2.20889	0.000130501	calm3a
ENSDARG00000021059	2.20889	0.000130501	alas1
ENSDARG00000013351	2.20738	1.367e-05	cirbp
ENSDARG00000003933	2.20462	4.91891e-06	pkma
ENSDARG00000021140	2.20448	1.41488e-05	pabpc1b
ENSDARG00000030602	2.20426	4.95677e-05	rps19
ENSDARG00000093817	2.20388	0.000229031	hmgn2
ENSDARG00000039269	2.20309	0.000641027	arg2
ENSDARG00000089913	2.20309	0.000641027	cacna1g
ENSDARG00000023217	2.19934	0.000124832	crema
ENSDARG00000019881	2.19766	3.24768e-05	bsg
ENSDARG00000020594	2.19631	0.000746934	txlnba
ENSDARG00000013307	2.18544	8.71711e-07	rpl19
ENSDARG00000018306	2.18065	0.000445573	srl
ENSDARG00000060797	2.17657	0.000231818	pfkmb
ENSDARG00000017775	2.17291	0.000408866	atp5g3a
ENSDARG00000053222	2.17291	0.000408866	asb5b
ENSDARG00000068572	2.17291	0.000408866	slc16a1
ENSDARG00000013012	2.17101	2.0984e-06	rpl36
ENSDARG00000006413	2.16978	5.18778e-06	rpl38
ENSDARG00000041619	2.16978	5.18778e-06	gnb2l1
ENSDARG00000018637	2.16294	0.00456074	sec61g
ENSDARG00000038288	2.16294	0.00456074	cd151
ENSDARG00000053279	2.16294	0.00456074	apln
ENSDARG00000070437	2.15952	1.47345e-05	rpl22
ENSDARG00000018524	2.15912	8.15351e-05	midn
ENSDARG00000036298	2.15912	8.15351e-05	rps13
ENSDARG00000079497	2.15912	8.15351e-05	C5H8orf4 (2 of 2)
ENSDARG00000018105	2.15779	0.00175855	casq1b
ENSDARG00000068995	2.15779	0.00175855	zgc:101846
ENSDARG00000014830	2.1568	1.01676e-05	faua
ENSDARG00000013561	2.15349	0.00364377	pgm1
ENSDARG00000058549	2.15349	0.00364377	smyd1b
ENSDARG00000076927	2.15349	0.00364377	DUSP27
ENSDARG00000020261	2.14985	0.00157393	rab2a
ENSDARG00000091061	2.14985	0.00157393	slc38a3b
ENSDARG00000020242	2.14672	0.00105336	fermt2
ENSDARG00000070723	2.14672	0.00105336	ndufa9
ENSDARG00000036316	2.14473	3.37584e-05	rpl39
ENSDARG00000002344	2.14401	0.000746934	tubb4b
ENSDARG00000005924	2.14401	0.000746934	serpina10a
ENSDARG00000044153	2.14401	0.000746934	ppp1cb
ENSDARG00000054087	2.14401	0.000746934	irs1
ENSDARG00000090930	2.14401	0.000746934	si:ch211-120g10.1
ENSDARG00000020239	2.14164	0.000840769	lpin1
ENSDARG00000039007	2.1363	1.99291e-07	eno3
ENSDARG00000008785	2.13601	0.000398735	dldh
ENSDARG00000057026	2.13601	0.000398735	ran
ENSDARG00000036438	2.13451	0.000408866	ndufv1
ENSDARG00000014867	2.12884	2.19278e-06	rpl8
ENSDARG00000039929	2.12879	0.000128789	ckmt2b
ENSDARG00000019778	2.12435	5.02332e-05	rps6
ENSDARG00000025850	2.12094	2.29205e-05	rps21
ENSDARG00000034897	2.1014	5.38798e-05	rps10
ENSDARG00000044521	2.10042	0.000135925	eef1b2
ENSDARG00000086881	2.09975	0.000219198	IER2
ENSDARG00000036080	2.09948	0.000257735	cd81
ENSDARG00000009505	2.09888	0.000297619	slmo2
ENSDARG00000069135	2.09853	0.00039403	ppp1r15a
ENSDARG00000013078	2.09814	0.000746934	ywhaba
ENSDARG00000045064	2.09814	0.000746934	ablim1b
ENSDARG00000042518	2.09771	0.000467323	hipk2
ENSDARG00000045367	2.09723	0.000922547	tuba1b
ENSDARG00000016160	2.09669	0.000791723	gmpr
ENSDARG00000005121	2.09608	0.0016894	mfn1b
ENSDARG00000011934	2.09608	0.0016894	gyg1a
ENSDARG00000032049	2.09608	0.0016894	enah
ENSDARG00000075564	2.09608	0.0016894	fam13a
ENSDARG00000037388	2.09538	0.00153572	dtnba
ENSDARG00000093937	2.09538	0.00153572	cnn1b
ENSDARG00000006456	2.09457	0.0034922	pdgfrl
ENSDARG00000008413	2.09362	0.00202478	atp11a
ENSDARG00000012801	2.09362	0.00202478	pfkpb
ENSDARG00000017474	2.0925	0.00504501	zgc:110699
ENSDARG00000022454	2.0925	0.00504501	FAM167B
ENSDARG00000036496	2.0925	0.00504501	scp2b
ENSDARG00000045706	2.0925	0.00504501	tspan9b
ENSDARG00000054814	2.0925	0.00504501	PTP4A3 (2 of 2)
ENSDARG00000079504	2.0925	0.00504501	mfn2
ENSDARG00000004754	2.09115	0.00393772	hspa4a
ENSDARG00000030687	2.09115	0.00393772	PHKA2
ENSDARG00000073678	2.09115	0.00393772	CABZ01039301.1
ENSDARG00000079784	2.09115	0.00393772	TMEM71
ENSDARG00000055751	2.08258	1.81873e-06	fosb
ENSDARG00000025073	2.07659	7.7523e-06	rpl18a
ENSDARG00000040988	2.06918	1.61967e-05	tpi1b
ENSDARG00000031435	2.06377	0.000405587	zgc:56493
ENSDARG00000053291	2.06248	6.79397e-07	pnrc2
ENSDARG00000007344	2.06163	0.000746934	tcap
ENSDARG00000027009	2.05925	0.000718043	zgc:85777
ENSDARG00000053365	2.05673	8.63463e-05	rpl31
ENSDARG00000008433	2.05661	0.00142373	unc45b
ENSDARG00000011201	2.05517	8.13267e-05	rplp2l
ENSDARG00000015552	2.0465	0.00158105	phactr4a
ENSDARG00000042469	2.0465	0.00158105	ndufa12
ENSDARG00000057113	2.0465	0.00158105	c6
ENSDARG00000078113	2.0465	0.00158105	atp5ia
ENSDARG00000004187	2.04214	0.00350301	DNAJB5 (1 of 2)
ENSDARG00000007836	2.04214	0.00350301	ctsla
ENSDARG00000011824	2.04214	0.00350301	pbxip1b
ENSDARG00000020544	2.04214	0.00350301	rem1
ENSDARG00000029764	2.03708	0.00321626	mef2ca
ENSDARG00000010160	2.03508	3.22224e-05	rps15a
ENSDARG00000033789	2.03145	0.000424144	ndufb7
ENSDARG00000016889	2.03116	0.00761126	eif3g
ENSDARG00000056001	2.03116	0.00761126	fryb
ENSDARG00000086933	2.03116	0.00761126	tnni3k
ENSDARG00000087665	2.02975	4.99741e-05	hspb12
ENSDARG00000037071	2.02779	0.000785145	rps26
ENSDARG00000046154	2.02411	0.00450256	apooa
ENSDARG00000061862	2.02411	0.00450256	myo18ab
ENSDARG00000070914	2.02376	0.000727239	dusp6
ENSDARG00000012387	2.01929	0.00141894	pdha1a
ENSDARG00000032932	2.0156	0.0204887	cnksr1
ENSDARG00000091108	2.0156	0.0204887	xirp2c
ENSDARG00000095675	2.0156	0.0204887	CCDC141 (2 of 2)
ENSDARG00000058128	2.01337	5.15444e-05	msna
ENSDARG00000041400	2.0087	0.00274804	NDUFA3
ENSDARG00000003151	2.00237	0.0016894	skp1
ENSDARG00000035741	2.00237	0.0016894	slc25a11
ENSDARG00000055412	2.00237	0.0016894	mylk4b
ENSDARG00000002369	2.00014	4.653e-05	UBC
ENSDARG00000032102	1.99515	0.00228816	prdx3
ENSDARG00000042133	1.99515	0.00228816	si:dkey-51e6.1
ENSDARG00000054200	1.99515	0.00228816	CAMTA2
ENSDARG00000013335	1.99515	0.00364377	anxa6
ENSDARG00000021242	1.99515	0.00364377	mvp
ENSDARG00000039392	1.99515	0.00364377	wnk1b
ENSDARG00000013475	1.98685	0.00325043	cct4
ENSDARG00000015355	1.98685	0.00325043	fosl1a
ENSDARG00000041314	1.98685	0.00325043	ndufb9
ENSDARG00000045930	1.98685	0.00325043	rbpms2a
ENSDARG00000005368	1.97868	0.000671163	mcamb
ENSDARG00000038881	1.97721	0.00753517	acaa2
ENSDARG00000060594	1.97721	0.00753517	hadhab
ENSDARG00000004930	1.96777	2.76444e-05	lmo7a
ENSDARG00000003599	1.96586	0.00690362	rpl3
ENSDARG00000005840	1.96586	0.00690362	got2b
ENSDARG00000034753	1.96586	0.00690362	tspan3a
ENSDARG00000043856	1.96586	0.00690362	amd1
ENSDARG00000056510	1.96586	0.00690362	gstk1
ENSDARG00000020197	1.96467	0.000556106	rpl5a
ENSDARG00000067850	1.95334	0.00026062	jund
ENSDARG00000015164	1.95302	0.00212075	mknk2b
ENSDARG00000087188	1.95302	0.00212075	nfil3-6
ENSDARG00000039887	1.95278	0.00370206	c1qbp
ENSDARG00000074340	1.95278	0.00370206	serf2
ENSDARG00000013804	1.95232	0.0173454	capns1b
ENSDARG00000021633	1.95232	0.0173454	sh3bgr
ENSDARG00000039052	1.95232	0.0173454	klhl40a
ENSDARG00000061736	1.95232	0.0173454	ank3a
ENSDARG00000076348	1.95232	0.0173454	mylk3
ENSDARG00000093549	1.94689	6.33936e-05	sepp1a
ENSDARG00000006353	1.9449	0.00139654	itga5
ENSDARG00000003032	1.94191	0.00342087	eif4a1b
ENSDARG00000004592	1.94191	0.00342087	gpr22
ENSDARG00000044601	1.94191	0.00342087	rtn4a
ENSDARG00000055158	1.94191	0.00342087	prox1a
ENSDARG00000087636	1.94191	0.00342087	si:dkeyp-86f7.3
ENSDARG00000029533	1.94062	0.000164837	rpl18
ENSDARG00000052011	1.93964	0.00115536	rrad
ENSDARG00000043457	1.93897	6.20127e-11	gapdh
ENSDARG00000030765	1.93587	0.0204887	hadh
ENSDARG00000059442	1.93587	0.0204887	smtnb
ENSDARG00000021252	1.93587	0.00273096	cct6a
ENSDARG00000001437	1.92937	0.00769117	slc2a1a
ENSDARG00000018149	1.92937	0.00769117	slc38a4
ENSDARG00000023583	1.92937	0.00769117	coq9
ENSDARG00000043835	1.91475	0.00690362	rab3ab
ENSDARG00000076267	1.91475	0.00690362	MYOCD
ENSDARG00000077726	1.91475	0.00690362	ccrn4la
ENSDARG00000039914	1.91398	0.0016894	gapdhs
ENSDARG00000033201	1.9038	0.00393772
ENSDARG00000008292	1.89748	0.0168787	eif2s3
ENSDARG00000058088	1.89748	0.0168787	aifm1
ENSDARG00000067829	1.89748	0.0168787	ppargc1a
ENSDARG00000069603	1.89748	0.0168787	taok1
ENSDARG00000075121	1.89748	0.0168787	hbegfa
ENSDARG00000052658	1.89228	0.00257939	pptc7b
ENSDARG00000031164	1.88989	0.00160932	tuba8l2
ENSDARG00000015978	1.88663	0.0113332	COX5B (2 of 3)
ENSDARG00000017602	1.88663	0.0113332	ccng2
ENSDARG00000024746	1.8856	0.00197051	hsp90aa1.2
ENSDARG00000039997	1.87937	0.00516654	ptp4a3
ENSDARG00000020395	1.87677	0.0155984	mical2b
ENSDARG00000037559	1.87677	0.0155984	uba1
ENSDARG00000043608	1.87677	0.0155984	eif4ebp1
ENSDARG00000045399	1.87677	0.0155984	cct5
ENSDARG00000074321	1.87677	0.0155984	tead3a
ENSDARG00000092077	1.87677	0.0155984	si:dkey-147f3.4
ENSDARG00000009299	1.87677	0.0155984	dusp8a
ENSDARG00000024478	1.87677	0.0155984	mpc2
ENSDARG00000077083	1.87677	0.0155984	AVPR1A (2 of 2)
ENSDARG00000003695	1.87325	0.000746934	vdac3
ENSDARG00000012688	1.87325	0.000746934	eif1b
ENSDARG00000021346	1.87026	0.00299728	pdhb
ENSDARG00000016875	1.8695	0.00706326	gys1
ENSDARG00000044636	1.8695	0.00706326	tomm20b
ENSDARG00000052625	1.8695	0.00706326	fkbp1b
ENSDARG00000087243	1.8695	0.00706326	RAB7A (3 of 3)
ENSDARG00000057497	1.86479	0.00491203	stk35l
ENSDARG00000001950	1.86175	5.91345e-05	ak1
ENSDARG00000017235	1.85972	0.000517853	eif5a
ENSDARG00000043313	1.85905	0.00197051	ank2b
ENSDARG00000058603	1.85905	0.00197051	jph1a
ENSDARG00000013708	1.84945	0.0168787	usp9
ENSDARG00000026582	1.84945	0.0168787	iscub
ENSDARG00000043643	1.84945	0.0168787	ehbp1
ENSDARG00000087803	1.84945	0.0168787	NDUFC2
ENSDARG00000076411	1.84819	0.0106369	ptrfa
ENSDARG00000076566	1.84819	0.0106369	kank3
ENSDARG00000090174	1.84523	1.89847e-06	SLC39A14
ENSDARG00000013044	1.83306	0.00361971	ndufv2
ENSDARG00000014230	1.83143	0.00491203	dlst
ENSDARG00000033138	1.83143	0.00491203	lyrm2
ENSDARG00000008109	1.82914	0.0104873	eef1da
ENSDARG00000019732	1.82914	0.0104873	mtch2
ENSDARG00000045051	1.82914	0.0104873	slc16a3
ENSDARG00000059486	1.82914	0.0104873	cplx4b
ENSDARG00000070824	1.82914	0.0104873	ndufb5
ENSDARG00000003429	1.82569	0.0155408	hnrpdl
ENSDARG00000022045	1.82569	0.0155408	map1ab
ENSDARG00000036299	1.82569	0.0155408	nucb2a
ENSDARG00000036489	1.82569	0.0155408	MAF1
ENSDARG00000039677	1.82569	0.0155408	dsc2l
ENSDARG00000044753	1.82569	0.0155408	idh3b
ENSDARG00000059701	1.82569	0.0155408	flii
ENSDARG00000003191	1.8179	0.00706326	pkmb
ENSDARG00000003952	1.81344	0.00692548	pfn2
ENSDARG00000023536	1.81344	0.00692548	nnt
ENSDARG00000009250	1.80703	0.0236657	etfb
ENSDARG00000012914	1.80703	0.0236657	arhgef4
ENSDARG00000009867	1.80703	0.0236657	adssl1
ENSDARG00000057687	1.80703	0.0236657
ENSDARG00000044093	1.80674	0.00356641	rpl13a
ENSDARG00000096403	1.80626	1.76141e-08	si:dkey-153m14.1
ENSDARG00000007241	1.80337	0.000947229	mycb
ENSDARG00000090732	1.79738	0.00491203	5S_rRNA
ENSDARG00000003920	1.79704	0.0456176	setb
ENSDARG00000006598	1.79704	0.0456176	sgk2b
ENSDARG00000021869	1.79704	0.0456176	rcan2
ENSDARG00000026294	1.79704	0.0456176	erbb2
ENSDARG00000027017	1.79704	0.0456176	ppp2r5a
ENSDARG00000058158	1.79704	0.0456176	trim55b
ENSDARG00000060813	1.79704	0.0456176	plekha7a
ENSDARG00000076836	1.79704	0.0456176	gpx4b
ENSDARG00000094511	1.79704	0.0456176	ccl20
ENSDARG00000009285	1.79587	0.000652794	rpl15
ENSDARG00000045947	1.79291	0.00996475	HRC
ENSDARG00000086685	1.79291	0.00996475
ENSDARG00000041779	1.78291	0.00121735	trdn
ENSDARG00000037870	1.78232	7.7523e-06	actb2
ENSDARG00000074552	1.78229	0.00504501	ndufs7
ENSDARG00000062590	1.78185	0.0151091	pleca
ENSDARG00000095752	1.78185	0.0151091	si:dkeyp-13a3.7
ENSDARG00000028000	1.78107	0.0155965	pfkpa
ENSDARG00000037259	1.78107	0.0155965	ndufb6
ENSDARG00000045461	1.78107	0.0155965	eci2
ENSDARG00000052840	1.78107	0.0155965	ndufs4
ENSDARG00000079939	1.78107	0.0155965	jmjd1cb
ENSDARG00000088020	1.78107	0.0155965	cdkn1d
ENSDARG00000089608	1.78107	0.0155965	ppp1cbl
ENSDARG00000090040	1.78107	0.0155965
ENSDARG00000005891	1.76927	0.0218297	cyb5r3
ENSDARG00000023724	1.76927	0.0218297	cdc42se1
ENSDARG00000026655	1.76927	0.0218297	tspo
ENSDARG00000089837	1.76927	0.0218297	slc35d2
ENSDARG00000022833	1.76242	6.22209e-05	rplp2
ENSDARG00000003705	1.7602	0.00984697	prnprs3
ENSDARG00000015918	1.7602	0.00984697	dlat
ENSDARG00000026766	1.7602	0.00984697	bcl2l10
ENSDARG00000068214	1.75914	0.00197051	ccni
ENSDARG00000035918	1.75301	0.0139706	bzw2
ENSDARG00000056583	1.75301	0.0139706	ndufs6
ENSDARG00000016143	1.75014	0.0406075	xiap
ENSDARG00000020764	1.75014	0.0406075	slmapb
ENSDARG00000039399	1.75014	0.0406075	nt5c2a
ENSDARG00000044565	1.75014	0.0406075	ola1
ENSDARG00000060006	1.75014	0.0406075	nedd4l
ENSDARG00000060766	1.75014	0.0406075	PXN (1 of 3)
ENSDARG00000076850	1.75014	0.0406075	si:ch211-157b11.14
ENSDARG00000015059	1.75014	0.0406075	daam1a
ENSDARG00000042934	1.75014	0.0406075	ctgfa
ENSDARG00000073732	1.75014	0.0406075	myh14
ENSDARG00000077717	1.74824	0.00191154	RPL29
ENSDARG00000070426	1.74716	0.00664972	chac1
ENSDARG00000021124	1.74598	0.00339959	cfl1
ENSDARG00000061764	1.74232	0.0089717	ahnak
ENSDARG00000002731	1.74174	0.0218297	sdc2
ENSDARG00000007526	1.74174	0.0218297	ndufs2
ENSDARG00000010717	1.74174	0.0218297	chchd10
ENSDARG00000013777	1.74174	0.0218297	ppp1r13l
ENSDARG00000017665	1.74174	0.0218297	snrkb
ENSDARG00000055792	1.74174	0.0218297	FOXO4
ENSDARG00000054578	1.73543	0.0212816	arl6ip1
ENSDARG00000087624	1.73543	0.0212816	LRRC2
ENSDARG00000007795	1.7305	0.0142803	cst3
ENSDARG00000019205	1.7305	0.0142803	fam120c
ENSDARG00000091600	1.7305	0.0142803	CR352229.1
ENSDARG00000035990	1.7305	0.0142803	cited4a
ENSDARG00000086746	1.72656	0.0133052
ENSDARG00000095921	1.72656	0.0133052	si:ch1073-325m22.2
ENSDARG00000013921	1.72333	0.00938953	frya
ENSDARG00000044395	1.72333	0.00938953	ZFP36
ENSDARG00000071196	1.71834	0.00453774	sdprb
ENSDARG00000003820	1.71265	0.0456176	nr1d2a
ENSDARG00000014022	1.71265	0.0456176	NFAT5 (1 of 2)
ENSDARG00000017812	1.71265	0.0456176	traf2b
ENSDARG00000035831	1.71265	0.0456176	gata6
ENSDARG00000035944	1.71265	0.0456176	sync
ENSDARG00000043502	1.71265	0.0456176	ccdc124
ENSDARG00000062177	1.71265	0.0456176	dcbld2
ENSDARG00000070435	1.71265	0.0456176	vapb
ENSDARG00000076787	1.71265	0.0456176	angpt4
ENSDARG00000009534	1.70681	0.0204887	wls
ENSDARG00000025789	1.70681	0.0204887	chd4b
ENSDARG00000057128	1.70492	0.0295158	hadhaa
ENSDARG00000058463	1.70492	0.0295158	ndufab1a
ENSDARG00000087456	1.70342	0.0132575	NDUFB1
ENSDARG00000063344	1.70222	0.0175748	fam162a
ENSDARG00000071403	1.70222	0.0175748	oaz1a
ENSDARG00000086461	1.70122	0.00863389	fundc2
ENSDARG00000041232	1.69693	0.00235381	rps29
ENSDARG00000019417	1.67726	0.0266178	gadd45g
ENSDARG00000020086	1.67726	0.0266178	NUAK1 (1 of 2)
ENSDARG00000029072	1.67726	0.0266178	klf6a
ENSDARG00000036588	1.67726	0.0266178	mhc1zba
ENSDARG00000040874	1.67726	0.0266178	add3a
ENSDARG00000016443	1.67555	0.0199371	eif3c
ENSDARG00000059304	1.67335	0.0490136	chchd2
ENSDARG00000090408	1.67335	0.0490136
ENSDARG00000020235	1.67041	0.039022	sept9a
ENSDARG00000023921	1.67041	0.039022	dnaja2
ENSDARG00000035308	1.67041	0.039022	grb10b
ENSDARG00000038267	1.67041	0.039022	pdlim5a
ENSDARG00000043944	1.67041	0.039022	etfa
ENSDARG00000054696	1.67041	0.039022	psmb4
ENSDARG00000056929	1.67041	0.039022	kdm6bb
ENSDARG00000061338	1.67041	0.039022	ddx6
ENSDARG00000075251	1.67041	0.039022	kif5bb
ENSDARG00000079823	1.67041	0.039022	MRPS36
ENSDARG00000089302	1.67041	0.039022	hnrnpa0a
ENSDARG00000042389	1.66994	0.00483471	RPL37A
ENSDARG00000026531	1.66369	0.0100561	alcama
ENSDARG00000019383	1.65582	0.0169544	cdc42bpb
ENSDARG00000009779	1.65582	0.0169544	mcl1a
ENSDARG00000051986	1.65208	0.0173373	ndufs8a
ENSDARG00000020573	1.65208	0.0250504	ddx3
ENSDARG00000076241	1.64743	0.0276681	txlnbb
ENSDARG00000039066	1.64151	0.0461937	klhl31
ENSDARG00000058597	1.64151	0.0461937	nt5c3a
ENSDARG00000075282	1.64151	0.0461937	irs2
ENSDARG00000004377	1.63479	0.0155984	ppp1r13ba
ENSDARG00000062359	1.63479	0.0155984	scn3b
ENSDARG00000013333	1.63373	0.0490136	ndufa10
ENSDARG00000039051	1.63373	0.0490136	hhatla
ENSDARG00000042236	1.63373	0.0490136	atrx
ENSDARG00000058356	1.63373	0.0490136	elovl1b
ENSDARG00000078318	1.63373	0.0490136	tmod1
ENSDARG00000095861	1.63373	0.0490136	si:ch1073-441p17.1
ENSDARG00000040439	1.62904	0.0168787	rsl24d1
ENSDARG00000022303	1.62679	0.00984392	hig1
ENSDARG00000037421	1.62679	0.00984392	egr1
ENSDARG00000037867	1.62127	0.00650966	si:ch211-194i10.5
ENSDARG00000070395	1.60789	0.0308001	cs
ENSDARG00000003017	1.60156	0.0456176	zgc:55512
ENSDARG00000055223	1.60156	0.0456176	ablim2
ENSDARG00000079018	1.60156	0.0456176	fkbp3
ENSDARG00000070208	1.59883	0.0236657	BX530070.2
ENSDARG00000010625	1.59725	0.0146573	clic2
ENSDARG00000019231	1.58928	0.0140599	spna2
ENSDARG00000075608	1.57413	0.020662	mical2a
ENSDARG00000001578	1.57313	0.0436822	echs1
ENSDARG00000016238	1.57313	0.0436822	arl6ip5b
ENSDARG00000021113	1.57313	0.0436822	ptmaa
ENSDARG00000028198	1.57313	0.0436822	ube2v2
ENSDARG00000042213	1.57313	0.0436822	si:ch211-233h19.2
ENSDARG00000029688	1.56131	0.00865012	mcm5
ENSDARG00000055064	1.55831	0.0294414	prdx5
ENSDARG00000079307	1.52333	0.0186498	si:dkey-205h13.1
ENSDARG00000028889	1.50871	0.0330414	ndufb10
ENSDARG00000003109	1.50462	0.04823	rcan1a
ENSDARG00000031720	1.50462	0.04823	clstn1
ENSDARG00000021924	1.49967	0.0218297	hsp70.3
ENSDARG00000085168	1.49088	0.037561	AL935186.3
ENSDARG00000091234	1.47314	0.0251253	CU019646.2
ENSDARG00000075990	1.42679	0.0347777	acap3a
ENSDARG00000080337	-1.00452	3.04247e-08	AC024175.4
ENSDARG00000063911	-1.02404	0.000192382	mt-atp6
ENSDARG00000082753	-1.17456	0.00064245	AC024175.17
ENSDARG00000063917	-1.39786	1.06803e-06	mt-nd4
ENSDARG00000063899	-1.46164	2.41446e-06	mt-nd2
ENSDARG00000063908	-1.48335	1.90435e-09	mt-co2
ENSDARG00000063912	-1.49427	1.75444e-08	mt-co3
ENSDARG00000063910	-1.54731	0.0152633	mt-atp8
ENSDARG00000063924	-1.55102	3.22736e-08	mt-cyb
ENSDARG00000063922	-1.66872	0.0214194	mt-nd6
ENSDARG00000063895	-1.68195	1.0002e-07	mt-nd1
ENSDARG00000080128	-1.72028	0.00940961	AC024175.1
ENSDARG00000063905	-1.74911	6.89087e-13	mt-co1
ENSDARG00000063921	-1.83228	7.74839e-07	mt-nd5
ENSDARG00000081369	-1.86727	0.00418238	AC024175.9
ENSDARG00000063914	-1.98793	1.69979e-08	mt-nd3
ENSDARG00000081368	-2.02054	0.0151091	SNORD52
ENSDARG00000082787	-2.13613	0.0082642	5S_rRNA
ENSDARG00000081938	-2.27614	9.35762e-05	AC024175.13

## Sheet: GO-terms Up Cl7 p<0.01
Category	Term	Count	%	PValue	Genes	List Total	Pop Hits	Pop Total	Fold Enrichment	Bonferroni	Benjamini	FDR
GOTERM_CC_DIRECT	GO:0005840~ribosome	68	13.6273	2.20335e-65	ENSDARG00000006691, ENSDARG00000005791, ENSDARG00000023298, ENSDARG00000070849, ENSDARG00000015862, ENSDARG00000058451, ENSDARG00000003599, ENSDARG00000007320, ENSDARG00000019181, ENSDARG00000037350, ENSDARG00000013307, ENSDARG00000035860, ENSDARG00000070437, ENSDARG00000010160, ENSDARG00000077717, ENSDARG00000032725, ENSDARG00000042905, ENSDARG00000055475, ENSDARG00000039347, ENSDARG00000053457,…	377	162	15208	16.9326	2.99655e-63	2.99655e-63	2.58651e-62
GOTERM_MF_DIRECT	GO:0003735~structural constituent of ribosome	70	14.0281	2.6374e-57	ENSDARG00000006691, ENSDARG00000005791, ENSDARG00000023298, ENSDARG00000070849, ENSDARG00000015862, ENSDARG00000058451, ENSDARG00000003599, ENSDARG00000007320, ENSDARG00000019181, ENSDARG00000037350, ENSDARG00000013307, ENSDARG00000035860, ENSDARG00000070437, ENSDARG00000010160, ENSDARG00000077717, ENSDARG00000032725, ENSDARG00000042905, ENSDARG00000055475, ENSDARG00000025566, ENSDARG00000092553,…	410	212	15797	12.7219	9.36278e-55	9.36278e-55	3.61473e-54
GOTERM_CC_DIRECT	GO:0030529~intracellular ribonucleoprotein complex	61	12.2244	1.08568e-48	ENSDARG00000006691, ENSDARG00000005791, ENSDARG00000023298, ENSDARG00000070849, ENSDARG00000015862, ENSDARG00000058451, ENSDARG00000003599, ENSDARG00000007320, ENSDARG00000019181, ENSDARG00000037350, ENSDARG00000013307, ENSDARG00000035860, ENSDARG00000010160, ENSDARG00000042905, ENSDARG00000055475, ENSDARG00000039347, ENSDARG00000053457, ENSDARG00000006316, ENSDARG00000041435, ENSDARG00000053058,…	377	200	15208	12.3036	1.47653e-46	7.38264e-47	1.27448e-45
GOTERM_BP_DIRECT	GO:0006412~translation	74	14.8297	2.23336e-47	ENSDARG00000006691, ENSDARG00000005791, ENSDARG00000023298, ENSDARG00000070849, ENSDARG00000015862, ENSDARG00000058451, ENSDARG00000003599, ENSDARG00000019181, ENSDARG00000037350, ENSDARG00000013307, ENSDARG00000035860, ENSDARG00000070437, ENSDARG00000010160, ENSDARG00000077717, ENSDARG00000032725, ENSDARG00000042905, ENSDARG00000055475, ENSDARG00000025566, ENSDARG00000092553, ENSDARG00000039347,…	410	314	14912	8.57145	1.48518e-44	1.48518e-44	3.34491e-44
GOTERM_CC_DIRECT	GO:0022625~cytosolic large ribosomal subunit	35	7.01403	1.05375e-41	ENSDARG00000018334, ENSDARG00000006691, ENSDARG00000010516, ENSDARG00000088030, ENSDARG00000025073, ENSDARG00000005791, ENSDARG00000029500, ENSDARG00000011201, ENSDARG00000036316, ENSDARG00000041182, ENSDARG00000058451, ENSDARG00000044093, ENSDARG00000003599, ENSDARG00000007320, ENSDARG00000037350, ENSDARG00000013307, ENSDARG00000070437, ENSDARG00000077717, ENSDARG00000042905, ENSDARG00000019230,…	377	54	15208	26.146	1.4331e-39	4.77699e-40	1.237e-38
GOTERM_CC_DIRECT	GO:0022627~cytosolic small ribosomal subunit	27	5.41082	1.43579e-33	ENSDARG00000055475, ENSDARG00000036875, ENSDARG00000037071, ENSDARG00000045487, ENSDARG00000039347, ENSDARG00000030602, ENSDARG00000036629, ENSDARG00000023298, ENSDARG00000070849, ENSDARG00000019778, ENSDARG00000046157, ENSDARG00000036298, ENSDARG00000021838, ENSDARG00000053058, ENSDARG00000077291, ENSDARG00000035692, ENSDARG00000041232, ENSDARG00000019181, ENSDARG00000034897, ENSDARG00000043453,…	377	38	15208	28.6623	1.95267e-31	4.88168e-32	1.68547e-30
GOTERM_CC_DIRECT	GO:0030018~Z disc	16	3.20641	4.02362e-16	ENSDARG00000071331, ENSDARG00000008433, ENSDARG00000057317, ENSDARG00000023797, ENSDARG00000007344, ENSDARG00000037266, ENSDARG00000000563, ENSDARG00000039256, ENSDARG00000018105, ENSDARG00000019117, ENSDARG00000078696, ENSDARG00000010478, ENSDARG00000010784, ENSDARG00000039486, ENSDARG00000058656, ENSDARG00000028213	377	33	15208	19.5586	6.03961e-14	1.21014e-14	5.21805e-13
GOTERM_BP_DIRECT	GO:0015986~ATP synthesis coupled proton transport	14	2.80561	3.09721e-14	ENSDARG00000095897, ENSDARG00000009447, ENSDARG00000014313, ENSDARG00000019404, ENSDARG00000011553, ENSDARG00000056008, ENSDARG00000070083, ENSDARG00000045514, ENSDARG00000010149, ENSDARG00000068940, ENSDARG00000001788, ENSDARG00000078113, ENSDARG00000017775, ENSDARG00000011841	410	26	14912	19.5842	2.05985e-11	1.02993e-11	4.63962e-11
GOTERM_BP_DIRECT	GO:0006096~glycolytic process	15	3.00601	1.50142e-13	ENSDARG00000012987, ENSDARG00000039914, ENSDARG00000034470, ENSDARG00000040988, ENSDARG00000011665, ENSDARG00000005423, ENSDARG00000057571, ENSDARG00000012801, ENSDARG00000022456, ENSDARG00000060797, ENSDARG00000019702, ENSDARG00000039007, ENSDARG00000043457, ENSDARG00000039452, ENSDARG00000054191	410	35	14912	15.5875	9.98179e-11	3.32726e-11	2.24809e-10
GOTERM_MF_DIRECT	GO:0046933~proton-transporting ATP synthase activity, rotational mechanism	11	2.20441	2.00826e-12	ENSDARG00000056008, ENSDARG00000011553, ENSDARG00000019404, ENSDARG00000070083, ENSDARG00000095897, ENSDARG00000009447, ENSDARG00000045514, ENSDARG00000010149, ENSDARG00000001788, ENSDARG00000017775, ENSDARG00000011841	410	17	15797	24.9307	7.1294e-10	3.5647e-10	2.75248e-09
GOTERM_CC_DIRECT	GO:0005622~intracellular	71	14.2285	3.34516e-12	ENSDARG00000020544, ENSDARG00000040778, ENSDARG00000005791, ENSDARG00000023298, ENSDARG00000012409, ENSDARG00000015862, ENSDARG00000061242, ENSDARG00000058451, ENSDARG00000003599, ENSDARG00000019181, ENSDARG00000037350, ENSDARG00000013307, ENSDARG00000035860, ENSDARG00000070437, ENSDARG00000077717, ENSDARG00000021124, ENSDARG00000055475, ENSDARG00000039347, ENSDARG00000025428, ENSDARG00000006316,…	377	1175	15208	2.43754	4.54949e-10	7.58248e-11	3.92695e-09
GOTERM_BP_DIRECT	GO:0043009~chordate embryonic development	23	4.60922	3.72348e-12	ENSDARG00000018334, ENSDARG00000088030, ENSDARG00000005791, ENSDARG00000030602, ENSDARG00000036629, ENSDARG00000029688, ENSDARG00000070849, ENSDARG00000044092, ENSDARG00000011201, ENSDARG00000058451, ENSDARG00000043509, ENSDARG00000035692, ENSDARG00000058105, ENSDARG00000041232, ENSDARG00000006413, ENSDARG00000051783, ENSDARG00000042566, ENSDARG00000010160, ENSDARG00000055996, ENSDARG00000020197,…	410	126	14912	6.6391	2.4761e-09	6.19026e-10	5.57665e-09
GOTERM_BP_DIRECT	GO:0002181~cytoplasmic translation	12	2.40481	5.81646e-12	ENSDARG00000007320, ENSDARG00000088030, ENSDARG00000037350, ENSDARG00000051783, ENSDARG00000070437, ENSDARG00000077717, ENSDARG00000021864, ENSDARG00000011201, ENSDARG00000009285, ENSDARG00000058451, ENSDARG00000014867, ENSDARG00000053365	410	23	14912	18.976	3.86794e-09	7.73589e-10	8.71134e-09
GOTERM_MF_DIRECT	GO:0008137~NADH dehydrogenase (ubiquinone) activity	12	2.40481	6.97698e-11	ENSDARG00000056108, ENSDARG00000042469, ENSDARG00000033789, ENSDARG00000041314, ENSDARG00000015385, ENSDARG00000013044, ENSDARG00000036438, ENSDARG00000074552, ENSDARG00000010113, ENSDARG00000058041, ENSDARG00000028546, ENSDARG00000019332	410	29	15797	15.9431	2.47683e-08	8.2561e-09	9.5624e-08
GOTERM_BP_DIRECT	GO:0000028~ribosomal small subunit assembly	10	2.00401	7.76913e-11	ENSDARG00000055475, ENSDARG00000019181, ENSDARG00000034897, ENSDARG00000036629, ENSDARG00000043453, ENSDARG00000030602, ENSDARG00000023298, ENSDARG00000035860, ENSDARG00000070849, ENSDARG00000046157	410	16	14912	22.7317	5.16647e-08	8.61079e-09	1.16359e-07
GOTERM_BP_DIRECT	GO:0060047~heart contraction	16	3.20641	8.31302e-11	ENSDARG00000075017, ENSDARG00000045180, ENSDARG00000034270, ENSDARG00000019096, ENSDARG00000008785, ENSDARG00000007344, ENSDARG00000014230, ENSDARG00000032976, ENSDARG00000001803, ENSDARG00000020610, ENSDARG00000023963, ENSDARG00000058548, ENSDARG00000041779, ENSDARG00000039486, ENSDARG00000028213, ENSDARG00000058656	410	62	14912	9.386	5.52816e-08	7.89737e-09	1.24504e-07
GOTERM_MF_DIRECT	GO:0009055~electron carrier activity	13	2.60521	2.31852e-09	ENSDARG00000042853, ENSDARG00000075768, ENSDARG00000016687, ENSDARG00000042469, ENSDARG00000069464, ENSDARG00000027009, ENSDARG00000038608, ENSDARG00000038075, ENSDARG00000044562, ENSDARG00000028546, ENSDARG00000038900, ENSDARG00000054907, ENSDARG00000016721	410	48	15797	10.435	8.23074e-07	2.05769e-07	3.17768e-06
GOTERM_BP_DIRECT	GO:0006099~tricarboxylic acid cycle	10	2.00401	7.30478e-09	ENSDARG00000075768, ENSDARG00000007294, ENSDARG00000043371, ENSDARG00000034270, ENSDARG00000052712, ENSDARG00000075132, ENSDARG00000038608, ENSDARG00000014230, ENSDARG00000017772, ENSDARG00000016721	410	24	14912	15.1545	4.85767e-06	6.0721e-07	1.09404e-05
GOTERM_CC_DIRECT	GO:0000276~mitochondrial proton-transporting ATP synthase complex, coupling factor F(o)	8	1.60321	8.06543e-09	ENSDARG00000056008, ENSDARG00000011553, ENSDARG00000009447, ENSDARG00000068940, ENSDARG00000014313, ENSDARG00000078113, ENSDARG00000017775, ENSDARG00000011841	377	13	15208	24.8243	1.0969e-06	1.567e-07	9.468e-06
GOTERM_MF_DIRECT	GO:0003779~actin binding	26	5.21042	8.81552e-09	ENSDARG00000040009, ENSDARG00000071113, ENSDARG00000030722, ENSDARG00000078696, ENSDARG00000018820, ENSDARG00000055075, ENSDARG00000021124, ENSDARG00000000103, ENSDARG00000018566, ENSDARG00000021987, ENSDARG00000015552, ENSDARG00000061862, ENSDARG00000037266, ENSDARG00000079564, ENSDARG00000071090, ENSDARG00000028533, ENSDARG00000019117, ENSDARG00000045064, ENSDARG00000030490, ENSDARG00000003952,…	410	251	15797	3.99108	3.1295e-06	6.25902e-07	1.20822e-05
GOTERM_BP_DIRECT	GO:0051726~regulation of cell cycle	14	2.80561	1.51724e-08	ENSDARG00000018334, ENSDARG00000007320, ENSDARG00000058105, ENSDARG00000041232, ENSDARG00000043531, ENSDARG00000015552, ENSDARG00000006316, ENSDARG00000042566, ENSDARG00000010160, ENSDARG00000055996, ENSDARG00000027744, ENSDARG00000076667, ENSDARG00000067850, ENSDARG00000068214	410	64	14912	7.9561	1.00896e-05	1.12107e-06	2.27238e-05
GOTERM_CC_DIRECT	GO:0005739~mitochondrion	37	7.41483	1.87122e-08	ENSDARG00000042853, ENSDARG00000007294, ENSDARG00000016687, ENSDARG00000026766, ENSDARG00000038900, ENSDARG00000044092, ENSDARG00000041068, ENSDARG00000016721, ENSDARG00000075768, ENSDARG00000005840, ENSDARG00000092873, ENSDARG00000045230, ENSDARG00000003695, ENSDARG00000075132, ENSDARG00000031435, ENSDARG00000059128, ENSDARG00000060594, ENSDARG00000017772, ENSDARG00000019332, ENSDARG00000054588,…	377	514	15208	2.90382	2.54486e-06	3.18107e-07	2.19662e-05
GOTERM_BP_DIRECT	GO:0030239~myofibril assembly	11	2.20441	2.14685e-08	ENSDARG00000022101, ENSDARG00000008433, ENSDARG00000010478, ENSDARG00000021987, ENSDARG00000005513, ENSDARG00000045864, ENSDARG00000037266, ENSDARG00000031756, ENSDARG00000055158, ENSDARG00000071090, ENSDARG00000058656	410	35	14912	11.4308	1.42764e-05	1.42765e-06	3.21534e-05
GOTERM_MF_DIRECT	GO:0004129~cytochrome-c oxidase activity	10	2.00401	3.03032e-08	ENSDARG00000056108, ENSDARG00000038577, ENSDARG00000069464, ENSDARG00000032970, ENSDARG00000012388, ENSDARG00000037860, ENSDARG00000045230, ENSDARG00000068738, ENSDARG00000054907, ENSDARG00000054588	410	29	15797	13.286	1.07576e-05	1.79294e-06	4.15325e-05
GOTERM_CC_DIRECT	GO:0005743~mitochondrial inner membrane	19	3.80762	3.58487e-08	ENSDARG00000095897, ENSDARG00000092553, ENSDARG00000056141, ENSDARG00000020893, ENSDARG00000010113, ENSDARG00000058041, ENSDARG00000014313, ENSDARG00000023583, ENSDARG00000016721, ENSDARG00000056108, ENSDARG00000075768, ENSDARG00000041400, ENSDARG00000059128, ENSDARG00000007745, ENSDARG00000093448, ENSDARG00000038076, ENSDARG00000023536, ENSDARG00000054588, ENSDARG00000045490	377	151	15208	5.07583	4.87542e-06	5.41714e-07	4.20828e-05
GOTERM_CC_DIRECT	GO:0005747~mitochondrial respiratory chain complex I	8	1.60321	4.60504e-07	ENSDARG00000006290, ENSDARG00000041314, ENSDARG00000013044, ENSDARG00000041400, ENSDARG00000010113, ENSDARG00000058041, ENSDARG00000028546, ENSDARG00000045490	377	21	15208	15.3674	6.26265e-05	6.26283e-06	0.000540584
GOTERM_MF_DIRECT	GO:0015078~hydrogen ion transmembrane transporter activity	8	1.60321	1.42442e-05	ENSDARG00000056008, ENSDARG00000011553, ENSDARG00000009447, ENSDARG00000068940, ENSDARG00000014313, ENSDARG00000078113, ENSDARG00000017775, ENSDARG00000011841	410	32	15797	9.63232	0.00504395	0.000722126	0.0195207
GOTERM_BP_DIRECT	GO:0030218~erythrocyte differentiation	9	1.80361	1.5578e-05	ENSDARG00000018334, ENSDARG00000043509, ENSDARG00000088030, ENSDARG00000041232, ENSDARG00000030602, ENSDARG00000023298, ENSDARG00000021864, ENSDARG00000044092, ENSDARG00000015128	410	42	14912	7.79373	0.010306	0.000941323	0.0233287
GOTERM_BP_DIRECT	GO:0006122~mitochondrial electron transport, ubiquinol to cytochrome c	6	1.2024	1.62538e-05	ENSDARG00000029064, ENSDARG00000038075, ENSDARG00000052304, ENSDARG00000059128, ENSDARG00000044562, ENSDARG00000071691	410	13	14912	16.7865	0.0107506	0.000900332	0.0243406
GOTERM_BP_DIRECT	GO:0045214~sarcomere organization	8	1.60321	1.64983e-05	ENSDARG00000020610, ENSDARG00000013422, ENSDARG00000019096, ENSDARG00000000563, ENSDARG00000071090, ENSDARG00000032976, ENSDARG00000028213, ENSDARG00000058656	410	31	14912	9.386	0.0109115	0.000843604	0.0247068
GOTERM_BP_DIRECT	GO:0015992~proton transport	8	1.60321	1.64983e-05	ENSDARG00000056008, ENSDARG00000070083, ENSDARG00000009447, ENSDARG00000045514, ENSDARG00000010149, ENSDARG00000014313, ENSDARG00000017775, ENSDARG00000023536	410	31	14912	9.386	0.0109115	0.000843604	0.0247068
GOTERM_CC_DIRECT	GO:0015935~small ribosomal subunit	6	1.2024	2.20199e-05	ENSDARG00000077291, ENSDARG00000019181, ENSDARG00000043453, ENSDARG00000070849, ENSDARG00000011405, ENSDARG00000021838	377	15	15208	16.1358	0.00299026	0.000272212	0.0258461
GOTERM_BP_DIRECT	GO:0007519~skeletal muscle tissue development	9	1.80361	4.31334e-05	ENSDARG00000008433, ENSDARG00000078696, ENSDARG00000021987, ENSDARG00000058548, ENSDARG00000056322, ENSDARG00000000563, ENSDARG00000039486, ENSDARG00000028213, ENSDARG00000058656	410	48	14912	6.81951	0.0282768	0.00204678	0.0645816
GOTERM_BP_DIRECT	GO:0000027~ribosomal large subunit assembly	6	1.2024	7.13639e-05	ENSDARG00000006691, ENSDARG00000043509, ENSDARG00000006316, ENSDARG00000020197, ENSDARG00000003599, ENSDARG00000058451	410	17	14912	12.8367	0.0463501	0.00315891	0.106829
GOTERM_BP_DIRECT	GO:0008016~regulation of heart contraction	7	1.40281	7.44743e-05	ENSDARG00000019117, ENSDARG00000013623, ENSDARG00000001803, ENSDARG00000020610, ENSDARG00000013422, ENSDARG00000008398, ENSDARG00000029439	410	27	14912	9.42945	0.0483208	0.00309067	0.111483
GOTERM_MF_DIRECT	GO:0003824~catalytic activity	29	5.81162	8.00323e-05	ENSDARG00000039929, ENSDARG00000040988, ENSDARG00000019644, ENSDARG00000005423, ENSDARG00000057571, ENSDARG00000041068, ENSDARG00000005840, ENSDARG00000035327, ENSDARG00000019702, ENSDARG00000052712, ENSDARG00000030687, ENSDARG00000075132, ENSDARG00000052304, ENSDARG00000070723, ENSDARG00000071691, ENSDARG00000060594, ENSDARG00000017772, ENSDARG00000043257, ENSDARG00000043371, ENSDARG00000034470,…	410	490	15797	2.2803	0.0280127	0.00354527	0.109633
GOTERM_BP_DIRECT	GO:0006941~striated muscle contraction	4	0.801603	8.02705e-05	ENSDARG00000020610, ENSDARG00000000563, ENSDARG00000045302, ENSDARG00000028213	410	4	14912	36.3707	0.0519822	0.00313519	0.120154
GOTERM_CC_DIRECT	GO:0045261~proton-transporting ATP synthase complex, catalytic core F(1)	4	0.801603	0.000144491	ENSDARG00000019404, ENSDARG00000070083, ENSDARG00000045514, ENSDARG00000010149	377	5	15208	32.2716	0.0194603	0.00163634	0.169486
GOTERM_BP_DIRECT	GO:0048738~cardiac muscle tissue development	5	1.002	0.000157917	ENSDARG00000008433, ENSDARG00000078696, ENSDARG00000019096, ENSDARG00000032976, ENSDARG00000028213	410	11	14912	16.5322	0.099696	0.00581761	0.236252
GOTERM_CC_DIRECT	GO:0070469~respiratory chain	6	1.2024	0.000209599	ENSDARG00000056108, ENSDARG00000010113, ENSDARG00000059128, ENSDARG00000044562, ENSDARG00000058041, ENSDARG00000007745	377	23	15208	10.5234	0.0281059	0.00219056	0.245771
GOTERM_CC_DIRECT	GO:0031430~M band	4	0.801603	0.000283678	ENSDARG00000022101, ENSDARG00000000563, ENSDARG00000045302, ENSDARG00000028213	377	6	15208	26.893	0.0378507	0.00275232	0.332502
GOTERM_MF_DIRECT	GO:0070180~large ribosomal subunit rRNA binding	4	0.801603	0.000325113	ENSDARG00000051783, ENSDARG00000053457, ENSDARG00000021864, ENSDARG00000011201	410	6	15797	25.6862	0.109021	0.0127441	0.444669
GOTERM_MF_DIRECT	GO:0003954~NADH dehydrogenase activity	4	0.801603	0.000325113	ENSDARG00000033789, ENSDARG00000036438, ENSDARG00000010113, ENSDARG00000070723	410	6	15797	25.6862	0.109021	0.0127441	0.444669
GOTERM_MF_DIRECT	GO:0003723~RNA binding	26	5.21042	0.000327081	ENSDARG00000024276, ENSDARG00000021140, ENSDARG00000070849, ENSDARG00000029500, ENSDARG00000036316, ENSDARG00000037350, ENSDARG00000043453, ENSDARG00000026801, ENSDARG00000035860, ENSDARG00000070437, ENSDARG00000042905, ENSDARG00000009830, ENSDARG00000019230, ENSDARG00000004757, ENSDARG00000059259, ENSDARG00000017219, ENSDARG00000029533, ENSDARG00000017235, ENSDARG00000014867, ENSDARG00000013351,…	410	453	15797	2.21139	0.109643	0.0115461	0.447354
GOTERM_MF_DIRECT	GO:0019843~rRNA binding	6	1.2024	0.000393168	ENSDARG00000006691, ENSDARG00000037350, ENSDARG00000043453, ENSDARG00000011405, ENSDARG00000014690, ENSDARG00000014867	410	25	15797	9.24702	0.130296	0.0126109	0.537518
GOTERM_CC_DIRECT	GO:0005751~mitochondrial respiratory chain complex IV	5	1.002	0.000404348	ENSDARG00000056108, ENSDARG00000032970, ENSDARG00000012388, ENSDARG00000068738, ENSDARG00000054588	377	15	15208	13.4465	0.0535172	0.00366011	0.473635
GOTERM_BP_DIRECT	GO:0055114~oxidation-reduction process	33	6.61323	0.000413727	ENSDARG00000042853, ENSDARG00000015918, ENSDARG00000032102, ENSDARG00000016687, ENSDARG00000019644, ENSDARG00000036438, ENSDARG00000028546, ENSDARG00000038900, ENSDARG00000016721, ENSDARG00000075768, ENSDARG00000027009, ENSDARG00000074552, ENSDARG00000031435, ENSDARG00000059128, ENSDARG00000043457, ENSDARG00000060594, ENSDARG00000017772, ENSDARG00000023536, ENSDARG00000039914, ENSDARG00000043371,…	410	616	14912	1.94843	0.240569	0.0143791	0.617852
GOTERM_BP_DIRECT	GO:0006123~mitochondrial electron transport, cytochrome c to oxygen	5	1.002	0.000448668	ENSDARG00000032970, ENSDARG00000012388, ENSDARG00000044562, ENSDARG00000068738, ENSDARG00000054588	410	14	14912	12.9895	0.258019	0.0148108	0.669869
GOTERM_BP_DIRECT	GO:0046686~response to cadmium ion	5	1.002	0.000598642	ENSDARG00000055723, ENSDARG00000043531, ENSDARG00000029688, ENSDARG00000027744, ENSDARG00000042644	410	15	14912	12.1236	0.328483	0.018784	0.892847
GOTERM_BP_DIRECT	GO:0030241~skeletal muscle myosin thick filament assembly	4	0.801603	0.000660315	ENSDARG00000010478, ENSDARG00000029764, ENSDARG00000000563, ENSDARG00000028213	410	7	14912	20.7833	0.355483	0.0197681	0.984407
GOTERM_MF_DIRECT	GO:0000982~transcription factor activity, RNA polymerase II core promoter proximal region sequence-specific binding	5	1.002	0.00101567	ENSDARG00000031683, ENSDARG00000020133, ENSDARG00000055751, ENSDARG00000007823, ENSDARG00000015355	410	18	15797	10.7026	0.302843	0.0296147	1.38309
GOTERM_BP_DIRECT	GO:0006754~ATP biosynthetic process	4	0.801603	0.00103504	ENSDARG00000070083, ENSDARG00000045514, ENSDARG00000010149, ENSDARG00000014230	410	8	14912	18.1854	0.497751	0.0294979	1.53903
GOTERM_MF_DIRECT	GO:0016627~oxidoreductase activity, acting on the CH-CH group of donors	6	1.2024	0.00110681	ENSDARG00000042853, ENSDARG00000016687, ENSDARG00000027009, ENSDARG00000038608, ENSDARG00000038900, ENSDARG00000016721	410	31	15797	7.45728	0.325063	0.0297885	1.50634
GOTERM_CC_DIRECT	GO:0005750~mitochondrial respiratory chain complex III	4	0.801603	0.00112719	ENSDARG00000029064, ENSDARG00000038075, ENSDARG00000052304, ENSDARG00000071691	377	9	15208	17.9287	0.1422	0.00954072	1.31523
GOTERM_BP_DIRECT	GO:0009060~aerobic respiration	5	1.002	0.0012573	ENSDARG00000075768, ENSDARG00000036438, ENSDARG00000052304, ENSDARG00000071691, ENSDARG00000054588	410	18	14912	10.103	0.566832	0.034259	1.86661
GOTERM_BP_DIRECT	GO:0006936~muscle contraction	5	1.002	0.0015584	ENSDARG00000054458, ENSDARG00000020610, ENSDARG00000045864, ENSDARG00000041779, ENSDARG00000058656	410	19	14912	9.57125	0.645535	0.0406371	2.30878
GOTERM_BP_DIRECT	GO:0006094~gluconeogenesis	5	1.002	0.0015584	ENSDARG00000012987, ENSDARG00000040988, ENSDARG00000005423, ENSDARG00000014967, ENSDARG00000057571	410	19	14912	9.57125	0.645535	0.0406371	2.30878
GOTERM_CC_DIRECT	GO:0044297~cell body	3	0.601202	0.00179906	ENSDARG00000036371, ENSDARG00000045180, ENSDARG00000057911	377	3	15208	40.3395	0.217211	0.0143021	2.09163
GOTERM_BP_DIRECT	GO:0048821~erythrocyte development	5	1.002	0.00190624	ENSDARG00000043509, ENSDARG00000030490, ENSDARG00000041232, ENSDARG00000036629, ENSDARG00000030602	410	20	14912	9.09268	0.718848	0.0476306	2.81727
GOTERM_MF_DIRECT	GO:0005515~protein binding	15	3.00601	0.00191926	ENSDARG00000071331, ENSDARG00000008433, ENSDARG00000029150, ENSDARG00000079578, ENSDARG00000026766, ENSDARG00000023797, ENSDARG00000014571, ENSDARG00000057026, ENSDARG00000006456, ENSDARG00000044601, ENSDARG00000010478, ENSDARG00000077506, ENSDARG00000061794, ENSDARG00000042904, ENSDARG00000024746	410	221	15797	2.61511	0.494391	0.0475462	2.59863
GOTERM_MF_DIRECT	GO:0000104~succinate dehydrogenase activity	3	0.601202	0.00197178	ENSDARG00000075768, ENSDARG00000038608, ENSDARG00000016721	410	3	15797	38.5293	0.503748	0.0456373	2.66885
GOTERM_BP_DIRECT	GO:0007626~locomotory behavior	7	1.40281	0.00211686	ENSDARG00000071498, ENSDARG00000018820, ENSDARG00000021987, ENSDARG00000056322, ENSDARG00000039486, ENSDARG00000018566, ENSDARG00000058656	410	49	14912	5.19582	0.755662	0.0508541	3.12396
GOTERM_CC_DIRECT	GO:0015934~large ribosomal subunit	4	0.801603	0.00213403	ENSDARG00000057556, ENSDARG00000042905, ENSDARG00000044093, ENSDARG00000014867	377	11	15208	14.6689	0.252139	0.0160115	2.47663
GOTERM_BP_DIRECT	GO:0090131~mesenchyme migration	3	0.601202	0.00221048	ENSDARG00000036371, ENSDARG00000045180, ENSDARG00000057911	410	3	14912	36.3707	0.770441	0.0511997	3.25999
GOTERM_BP_DIRECT	GO:0001666~response to hypoxia	7	1.40281	0.00317071	ENSDARG00000031952, ENSDARG00000053279, ENSDARG00000032970, ENSDARG00000068940, ENSDARG00000070723, ENSDARG00000013475, ENSDARG00000054191	410	53	14912	4.80368	0.878989	0.0702348	4.645
GOTERM_MF_DIRECT	GO:0000166~nucleotide binding	62	12.4248	0.00390765	ENSDARG00000020544, ENSDARG00000039929, ENSDARG00000029150, ENSDARG00000040778, ENSDARG00000045930, ENSDARG00000057026, ENSDARG00000039256, ENSDARG00000070083, ENSDARG00000068992, ENSDARG00000013343, ENSDARG00000036371, ENSDARG00000055412, ENSDARG00000017219, ENSDARG00000039347, ENSDARG00000006316, ENSDARG00000008413, ENSDARG00000061862, ENSDARG00000004754, ENSDARG00000042535, ENSDARG00000001950,…	410	1678	15797	1.42361	0.750908	0.0832044	5.22473
GOTERM_BP_DIRECT	GO:0007507~heart development	13	2.60521	0.00390802	ENSDARG00000017219, ENSDARG00000056322, ENSDARG00000071113, ENSDARG00000071090, ENSDARG00000052708, ENSDARG00000002791, ENSDARG00000030722, ENSDARG00000053279, ENSDARG00000020610, ENSDARG00000058548, ENSDARG00000029764, ENSDARG00000031756, ENSDARG00000023290	410	179	14912	2.64145	0.926017	0.0831373	5.69588
GOTERM_BP_DIRECT	GO:0055005~ventricular cardiac myofibril assembly	3	0.601202	0.00434068	ENSDARG00000019096, ENSDARG00000079564, ENSDARG00000032976	410	4	14912	27.278	0.944581	0.0890956	6.30751
GOTERM_BP_DIRECT	GO:0006086~acetyl-CoA biosynthetic process from pyruvate	3	0.601202	0.00434068	ENSDARG00000015918, ENSDARG00000012387, ENSDARG00000021346	410	4	14912	27.278	0.944581	0.0890956	6.30751
GOTERM_BP_DIRECT	GO:0009408~response to heat	4	0.801603	0.00477263	ENSDARG00000041065, ENSDARG00000055723, ENSDARG00000029688, ENSDARG00000024746	410	13	14912	11.191	0.958472	0.0946363	6.91443
GOTERM_MF_DIRECT	GO:0052890~oxidoreductase activity, acting on the CH-CH group of donors, with a flavin as acceptor	4	0.801603	0.00507033	ENSDARG00000042853, ENSDARG00000016687, ENSDARG00000027009, ENSDARG00000038900	410	14	15797	11.0084	0.835451	0.10071	6.72973
GOTERM_MF_DIRECT	GO:0016491~oxidoreductase activity	26	5.21042	0.00512374	ENSDARG00000042853, ENSDARG00000032102, ENSDARG00000016687, ENSDARG00000039914, ENSDARG00000043371, ENSDARG00000015385, ENSDARG00000019644, ENSDARG00000013044, ENSDARG00000061764, ENSDARG00000012387, ENSDARG00000016160, ENSDARG00000008785, ENSDARG00000028546, ENSDARG00000038900, ENSDARG00000042644, ENSDARG00000016721, ENSDARG00000075768, ENSDARG00000027009, ENSDARG00000074552, ENSDARG00000001975,…	410	553	15797	1.8115	0.838557	0.0963484	6.79834
GOTERM_CC_DIRECT	GO:0005623~cell	9	1.80361	0.00533214	ENSDARG00000032102, ENSDARG00000071331, ENSDARG00000018820, ENSDARG00000013422, ENSDARG00000008785, ENSDARG00000003706, ENSDARG00000023797, ENSDARG00000039452, ENSDARG00000018566	377	108	15208	3.36163	0.516697	0.037546	6.08325
GOTERM_CC_DIRECT	GO:0045263~proton-transporting ATP synthase complex, coupling factor F(o)	3	0.601202	0.00580239	ENSDARG00000056008, ENSDARG00000009447, ENSDARG00000017775	377	5	15208	24.2037	0.546801	0.0387985	6.60316
GOTERM_CC_DIRECT	GO:0031672~A band	3	0.601202	0.00580239	ENSDARG00000008433, ENSDARG00000010478, ENSDARG00000010784	377	5	15208	24.2037	0.546801	0.0387985	6.60316
GOTERM_CC_DIRECT	GO:0005749~mitochondrial respiratory chain complex II, succinate dehydrogenase complex (ubiquinone)	3	0.601202	0.00580239	ENSDARG00000075768, ENSDARG00000038608, ENSDARG00000016721	377	5	15208	24.2037	0.546801	0.0387985	6.60316
GOTERM_BP_DIRECT	GO:0033539~fatty acid beta-oxidation using acyl-CoA dehydrogenase	4	0.801603	0.00595189	ENSDARG00000042853, ENSDARG00000016687, ENSDARG00000027009, ENSDARG00000038900	410	14	14912	10.3916	0.981123	0.113344	8.55277
GOTERM_BP_DIRECT	GO:0015991~ATP hydrolysis coupled proton transport	6	1.2024	0.00618817	ENSDARG00000056008, ENSDARG00000070083, ENSDARG00000009447, ENSDARG00000010149, ENSDARG00000017775, ENSDARG00000002791	410	43	14912	5.07499	0.983884	0.114329	8.87778
GOTERM_MF_DIRECT	GO:0008121~ubiquinol-cytochrome-c reductase activity	3	0.601202	0.00634943	ENSDARG00000029064, ENSDARG00000059128, ENSDARG00000007745	410	5	15797	23.1176	0.895778	0.112203	8.35982
GOTERM_MF_DIRECT	GO:0005219~ryanodine-sensitive calcium-release channel activity	3	0.601202	0.00634943	ENSDARG00000071331, ENSDARG00000003706, ENSDARG00000023797	410	5	15797	23.1176	0.895778	0.112203	8.35982
GOTERM_MF_DIRECT	GO:0004332~fructose-bisphosphate aldolase activity	3	0.601202	0.00634943	ENSDARG00000034470, ENSDARG00000011665, ENSDARG00000019702	410	5	15797	23.1176	0.895778	0.112203	8.35982
GOTERM_BP_DIRECT	GO:0014866~skeletal myofibril assembly	3	0.601202	0.00710342	ENSDARG00000010478, ENSDARG00000058548, ENSDARG00000000563	410	5	14912	21.8224	0.991267	0.126674	10.1266
GOTERM_BP_DIRECT	GO:0048739~cardiac muscle fiber development	3	0.601202	0.00710342	ENSDARG00000057317, ENSDARG00000000563, ENSDARG00000028213	410	5	14912	21.8224	0.991267	0.126674	10.1266
GOTERM_MF_DIRECT	GO:0051536~iron-sulfur cluster binding	6	1.2024	0.00712939	ENSDARG00000075768, ENSDARG00000007294, ENSDARG00000013044, ENSDARG00000074552, ENSDARG00000028546, ENSDARG00000007745	410	47	15797	4.91863	0.921134	0.119266	9.3408
GOTERM_MF_DIRECT	GO:0003995~acyl-CoA dehydrogenase activity	4	0.801603	0.00750701	ENSDARG00000042853, ENSDARG00000016687, ENSDARG00000027009, ENSDARG00000038900	410	16	15797	9.63232	0.931096	0.119603	9.81223
GOTERM_BP_DIRECT	GO:0006414~translational elongation	5	1.002	0.00769611	ENSDARG00000020850, ENSDARG00000044521, ENSDARG00000021864, ENSDARG00000011201, ENSDARG00000056119	410	29	14912	6.27082	0.994129	0.132998	10.9267
GOTERM_CC_DIRECT	GO:0014704~intercalated disc	3	0.601202	0.00856175	ENSDARG00000020242, ENSDARG00000018693, ENSDARG00000014571	377	6	15208	20.1698	0.68945	0.0541642	9.60119
GOTERM_CC_DIRECT	GO:0033177~proton-transporting two-sector ATPase complex, proton-transporting domain	3	0.601202	0.00856175	ENSDARG00000056008, ENSDARG00000009447, ENSDARG00000017775	377	6	15208	20.1698	0.68945	0.0541642	9.60119
GOTERM_BP_DIRECT	GO:0055003~cardiac myofibril assembly	3	0.601202	0.0104625	ENSDARG00000023963, ENSDARG00000000563, ENSDARG00000028213	410	6	14912	18.1854	0.999083	0.172241	14.5743
GOTERM_CC_DIRECT	GO:0030027~lamellipodium	4	0.801603	0.0108253	ENSDARG00000036371, ENSDARG00000045180, ENSDARG00000015552, ENSDARG00000057911	377	19	15208	8.49253	0.772424	0.0650714	11.9945
GOTERM_MF_DIRECT	GO:0004364~glutathione transferase activity	5	1.002	0.0111171	ENSDARG00000056510, ENSDARG00000042620, ENSDARG00000022995, ENSDARG00000042533, ENSDARG00000056119	410	34	15797	5.66607	0.981102	0.165059	14.2059
GOTERM_BP_DIRECT	GO:0006816~calcium ion transport	7	1.40281	0.0122923	ENSDARG00000071331, ENSDARG00000013422, ENSDARG00000008398, ENSDARG00000029439, ENSDARG00000003706, ENSDARG00000023797, ENSDARG00000089913	410	70	14912	3.63707	0.999732	0.194626	16.9098
GOTERM_BP_DIRECT	GO:0030036~actin cytoskeleton organization	7	1.40281	0.0122923	ENSDARG00000021193, ENSDARG00000003952, ENSDARG00000015552, ENSDARG00000077777, ENSDARG00000040009, ENSDARG00000071113, ENSDARG00000030722	410	70	14912	3.63707	0.999732	0.194626	16.9098
GOTERM_MF_DIRECT	GO:0050660~flavin adenine dinucleotide binding	6	1.2024	0.0126957	ENSDARG00000042853, ENSDARG00000016687, ENSDARG00000027009, ENSDARG00000008785, ENSDARG00000038900, ENSDARG00000016721	410	54	15797	4.28103	0.989282	0.178982	16.0641
GOTERM_BP_DIRECT	GO:0006950~response to stress	4	0.801603	0.0143179	ENSDARG00000029150, ENSDARG00000010478, ENSDARG00000027744, ENSDARG00000024746	410	19	14912	7.657	0.999932	0.218002	19.4256
GOTERM_BP_DIRECT	GO:0055088~lipid homeostasis	4	0.801603	0.0143179	ENSDARG00000042853, ENSDARG00000016687, ENSDARG00000027009, ENSDARG00000038900	410	19	14912	7.657	0.999932	0.218002	19.4256
GOTERM_BP_DIRECT	GO:0030240~skeletal muscle thin filament assembly	3	0.601202	0.0143834	ENSDARG00000010478, ENSDARG00000000563, ENSDARG00000028213	410	7	14912	15.5875	0.999935	0.214049	19.5059
GOTERM_CC_DIRECT	GO:0030175~filopodium	3	0.601202	0.0154669	ENSDARG00000036371, ENSDARG00000045180, ENSDARG00000057911	377	8	15208	15.1273	0.87996	0.0880507	16.7219
GOTERM_BP_DIRECT	GO:0006457~protein folding	9	1.80361	0.015968	ENSDARG00000029150, ENSDARG00000010478, ENSDARG00000028396, ENSDARG00000052625, ENSDARG00000031435, ENSDARG00000021252, ENSDARG00000004187, ENSDARG00000013475, ENSDARG00000024746	410	118	14912	2.77404	0.999978	0.229783	21.4224
GOTERM_BP_DIRECT	GO:0010628~positive regulation of gene expression	4	0.801603	0.0188755	ENSDARG00000036371, ENSDARG00000045180, ENSDARG00000057911, ENSDARG00000031756	410	21	14912	6.92776	0.999997	0.260454	24.8287
GOTERM_MF_DIRECT	GO:0000062~fatty-acyl-CoA binding	4	0.801603	0.020776	ENSDARG00000042853, ENSDARG00000016687, ENSDARG00000027009, ENSDARG00000038900	410	23	15797	6.70074	0.99942	0.266956	25.005
GOTERM_MF_DIRECT	GO:0016868~intramolecular transferase activity, phosphotransferases	3	0.601202	0.0213417	ENSDARG00000013561, ENSDARG00000005423, ENSDARG00000057571	410	9	15797	12.8431	0.999528	0.263859	25.5966
GOTERM_MF_DIRECT	GO:0051015~actin filament binding	7	1.40281	0.021713	ENSDARG00000021193, ENSDARG00000018820, ENSDARG00000011400, ENSDARG00000057317, ENSDARG00000000563, ENSDARG00000018566, ENSDARG00000028213	410	84	15797	3.21077	0.999587	0.258983	25.9825
GOTERM_MF_DIRECT	GO:0051082~unfolded protein binding	6	1.2024	0.0219936	ENSDARG00000029150, ENSDARG00000010478, ENSDARG00000021252, ENSDARG00000004187, ENSDARG00000013475, ENSDARG00000024746	410	62	15797	3.72864	0.999627	0.253532	26.2729
GOTERM_BP_DIRECT	GO:0008152~metabolic process	20	4.00802	0.0223725	ENSDARG00000015918, ENSDARG00000042853, ENSDARG00000007294, ENSDARG00000016687, ENSDARG00000040988, ENSDARG00000034270, ENSDARG00000005423, ENSDARG00000012387, ENSDARG00000014230, ENSDARG00000038900, ENSDARG00000021346, ENSDARG00000057571, ENSDARG00000038881, ENSDARG00000021059, ENSDARG00000012801, ENSDARG00000027009, ENSDARG00000060797, ENSDARG00000052712, ENSDARG00000042533, ENSDARG00000060594	410	419	14912	1.73607	1	0.295257	28.7432
GOTERM_CC_DIRECT	GO:0016459~myosin complex	6	1.2024	0.0234917	ENSDARG00000061862, ENSDARG00000076075, ENSDARG00000061579, ENSDARG00000079564, ENSDARG00000000103, ENSDARG00000079782	377	66	15208	3.66723	0.960561	0.126029	24.3506
GOTERM_BP_DIRECT	GO:0006108~malate metabolic process	3	0.601202	0.0237791	ENSDARG00000043371, ENSDARG00000075132, ENSDARG00000017772	410	9	14912	12.1236	1	0.304922	30.2633
GOTERM_BP_DIRECT	GO:0006120~mitochondrial electron transport, NADH to ubiquinone	3	0.601202	0.0237791	ENSDARG00000041314, ENSDARG00000013044, ENSDARG00000010113	410	9	14912	12.1236	1	0.304922	30.2633
GOTERM_BP_DIRECT	GO:0055008~cardiac muscle tissue morphogenesis	3	0.601202	0.0237791	ENSDARG00000020242, ENSDARG00000000563, ENSDARG00000028213	410	9	14912	12.1236	1	0.304922	30.2633
GOTERM_CC_DIRECT	GO:0005865~striated muscle thin filament	3	0.601202	0.0240597	ENSDARG00000045864, ENSDARG00000000563, ENSDARG00000028213	377	10	15208	12.1019	0.963561	0.124084	24.8655
GOTERM_BP_DIRECT	GO:0006874~cellular calcium ion homeostasis	5	1.002	0.0254027	ENSDARG00000071331, ENSDARG00000013422, ENSDARG00000029439, ENSDARG00000003706, ENSDARG00000023797	410	41	14912	4.43546	1	0.316307	31.9804
GOTERM_BP_DIRECT	GO:0000902~cell morphogenesis	4	0.801603	0.0270453	ENSDARG00000018693, ENSDARG00000013921, ENSDARG00000056001, ENSDARG00000028213	410	24	14912	6.06179	1	0.327239	33.6773
GOTERM_BP_DIRECT	GO:0001756~somitogenesis	7	1.40281	0.027784	ENSDARG00000026766, ENSDARG00000018693, ENSDARG00000011665, ENSDARG00000006353, ENSDARG00000056322, ENSDARG00000031756, ENSDARG00000027744	410	84	14912	3.03089	1	0.328794	34.4274
GOTERM_BP_DIRECT	GO:0000165~MAPK cascade	3	0.601202	0.0291917	ENSDARG00000002552, ENSDARG00000031756, ENSDARG00000029764	410	10	14912	10.9112	1	0.336646	35.8351
GOTERM_MF_DIRECT	GO:0003774~motor activity	6	1.2024	0.0312921	ENSDARG00000061862, ENSDARG00000076075, ENSDARG00000061579, ENSDARG00000079564, ENSDARG00000000103, ENSDARG00000079782	410	68	15797	3.39964	0.999987	0.331741	35.3208
GOTERM_MF_DIRECT	GO:0003729~mRNA binding	6	1.2024	0.0312921	ENSDARG00000018334, ENSDARG00000037071, ENSDARG00000079578, ENSDARG00000043453, ENSDARG00000030408, ENSDARG00000044093	410	68	15797	3.39964	0.999987	0.331741	35.3208
GOTERM_MF_DIRECT	GO:0051539~4 iron, 4 sulfur cluster binding	4	0.801603	0.0318142	ENSDARG00000075768, ENSDARG00000007294, ENSDARG00000036438, ENSDARG00000074552	410	27	15797	5.70804	0.99999	0.326845	35.797
GOTERM_MF_DIRECT	GO:0008092~cytoskeletal protein binding	4	0.801603	0.0318142	ENSDARG00000020610, ENSDARG00000021987, ENSDARG00000058128, ENSDARG00000003216	410	27	15797	5.70804	0.99999	0.326845	35.797
GOTERM_CC_DIRECT	GO:0005829~cytosol	19	3.80762	0.0318762	ENSDARG00000040988, ENSDARG00000013561, ENSDARG00000034270, ENSDARG00000005423, ENSDARG00000016651, ENSDARG00000057571, ENSDARG00000043856, ENSDARG00000039392, ENSDARG00000035692, ENSDARG00000042133, ENSDARG00000052712, ENSDARG00000075132, ENSDARG00000070426, ENSDARG00000043457, ENSDARG00000039452, ENSDARG00000004187, ENSDARG00000021443, ENSDARG00000017772, ENSDARG00000054087	377	451	15208	1.69945	0.987793	0.155873	31.6336
GOTERM_MF_DIRECT	GO:0000978~RNA polymerase II core promoter proximal region sequence-specific DNA binding	7	1.40281	0.0321476	ENSDARG00000031683, ENSDARG00000043531, ENSDARG00000020133, ENSDARG00000055751, ENSDARG00000007823, ENSDARG00000067850, ENSDARG00000015355	410	92	15797	2.93157	0.999991	0.320679	36.0993
GOTERM_CC_DIRECT	GO:0033017~sarcoplasmic reticulum membrane	3	0.601202	0.0341598	ENSDARG00000071331, ENSDARG00000029439, ENSDARG00000023797	377	12	15208	10.0849	0.991146	0.160603	33.5028
GOTERM_MF_DIRECT	GO:0046961~proton-transporting ATPase activity, rotational mechanism	4	0.801603	0.0349669	ENSDARG00000019404, ENSDARG00000095897, ENSDARG00000045514, ENSDARG00000010149	410	28	15797	5.50418	0.999997	0.334752	38.6038
GOTERM_BP_DIRECT	GO:0046034~ATP metabolic process	3	0.601202	0.0350414	ENSDARG00000001950, ENSDARG00000070083, ENSDARG00000010149	410	11	14912	9.91929	1	0.383745	41.3881
GOTERM_BP_DIRECT	GO:0000462~maturation of SSU-rRNA from tricistronic rRNA transcript (SSU-rRNA, 5.8S rRNA, LSU-rRNA)	4	0.801603	0.0368098	ENSDARG00000045487, ENSDARG00000039347, ENSDARG00000036629, ENSDARG00000055996	410	27	14912	5.38826	1	0.392746	42.9764
GOTERM_MF_DIRECT	GO:0016651~oxidoreductase activity, acting on NAD(P)H	3	0.601202	0.0371783	ENSDARG00000015385, ENSDARG00000036438, ENSDARG00000028546	410	12	15797	9.63232	0.999999	0.343157	40.5043
GOTERM_MF_DIRECT	GO:0003746~translation elongation factor activity	4	0.801603	0.0382746	ENSDARG00000020850, ENSDARG00000044521, ENSDARG00000017235, ENSDARG00000056119	410	29	15797	5.31438	0.999999	0.342841	41.4261
GOTERM_MF_DIRECT	GO:0005262~calcium channel activity	6	1.2024	0.0386769	ENSDARG00000071331, ENSDARG00000017006, ENSDARG00000008398, ENSDARG00000003706, ENSDARG00000023797, ENSDARG00000089913	410	72	15797	3.21077	0.999999	0.337576	41.761
GOTERM_BP_DIRECT	GO:0006006~glucose metabolic process	3	0.601202	0.0413003	ENSDARG00000039914, ENSDARG00000013561, ENSDARG00000043457	410	12	14912	9.09268	1	0.423027	46.8309
GOTERM_CC_DIRECT	GO:0005938~cell cortex	4	0.801603	0.0438209	ENSDARG00000020242, ENSDARG00000013921, ENSDARG00000014571, ENSDARG00000056001	377	32	15208	5.04244	0.997744	0.195592	40.9051
GOTERM_MF_DIRECT	GO:0005200~structural constituent of cytoskeleton	5	1.002	0.0452756	ENSDARG00000031164, ENSDARG00000002344, ENSDARG00000030490, ENSDARG00000020610, ENSDARG00000045367	410	52	15797	3.70474	1	0.374963	47.0074
GOTERM_BP_DIRECT	GO:0036302~atrioventricular canal development	3	0.601202	0.0479417	ENSDARG00000042535, ENSDARG00000077777, ENSDARG00000076126	410	13	14912	8.39325	1	0.466494	52.0882
GOTERM_BP_DIRECT	GO:0051597~response to methylmercury	3	0.601202	0.0479417	ENSDARG00000043531, ENSDARG00000027744, ENSDARG00000042644	410	13	14912	8.39325	1	0.466494	52.0882
GOTERM_CC_DIRECT	GO:0005859~muscle myosin complex	2	0.400802	0.048838	ENSDARG00000000563, ENSDARG00000028213	377	2	15208	40.3395	0.998897	0.209283	44.4442
GOTERM_CC_DIRECT	GO:0000275~mitochondrial proton-transporting ATP synthase complex, catalytic core F(1)	2	0.400802	0.048838	ENSDARG00000019404, ENSDARG00000095897	377	2	15208	40.3395	0.998897	0.209283	44.4442
GOTERM_MF_DIRECT	GO:0004738~pyruvate dehydrogenase activity	2	0.400802	0.0511132	ENSDARG00000015918, ENSDARG00000021346	410	2	15797	38.5293	1	0.403915	51.2798
GOTERM_MF_DIRECT	GO:0051371~muscle alpha-actinin binding	2	0.400802	0.0511132	ENSDARG00000000563, ENSDARG00000028213	410	2	15797	38.5293	1	0.403915	51.2798
GOTERM_MF_DIRECT	GO:0004365~glyceraldehyde-3-phosphate dehydrogenase (NAD+) (phosphorylating) activity	2	0.400802	0.0511132	ENSDARG00000039914, ENSDARG00000043457	410	2	15797	38.5293	1	0.403915	51.2798
GOTERM_MF_DIRECT	GO:0097493~structural molecule activity conferring elasticity	2	0.400802	0.0511132	ENSDARG00000000563, ENSDARG00000028213	410	2	15797	38.5293	1	0.403915	51.2798
GOTERM_CC_DIRECT	GO:0042383~sarcolemma	3	0.601202	0.0517743	ENSDARG00000071331, ENSDARG00000058548, ENSDARG00000023797	377	15	15208	8.0679	0.999276	0.214162	46.4244
GOTERM_BP_DIRECT	GO:0000461~endonucleolytic cleavage to generate mature 3'-end of SSU-rRNA from (SSU-rRNA, 5.8S rRNA, LSU-rRNA)	2	0.400802	0.0541047	ENSDARG00000019181, ENSDARG00000025850	410	2	14912	36.3707	1	0.502379	56.5289
GOTERM_BP_DIRECT	GO:0006533~aspartate catabolic process	2	0.400802	0.0541047	ENSDARG00000005840, ENSDARG00000041068	410	2	14912	36.3707	1	0.502379	56.5289
GOTERM_BP_DIRECT	GO:0060038~cardiac muscle cell proliferation	3	0.601202	0.05494	ENSDARG00000052958, ENSDARG00000019096, ENSDARG00000052960	410	14	14912	7.79373	1	0.50136	57.1003
GOTERM_MF_DIRECT	GO:0016772~transferase activity, transferring phosphorus-containing groups	3	0.601202	0.0562218	ENSDARG00000043257, ENSDARG00000039929, ENSDARG00000035327	410	15	15797	7.70585	1	0.426032	54.7543
GOTERM_BP_DIRECT	GO:0007015~actin filament organization	5	1.002	0.0570516	ENSDARG00000003046, ENSDARG00000077777, ENSDARG00000045864, ENSDARG00000063682, ENSDARG00000021124	410	53	14912	3.4312	1	0.508486	58.5138
GOTERM_BP_DIRECT	GO:0006811~ion transport	20	4.00802	0.065485	ENSDARG00000071331, ENSDARG00000013144, ENSDARG00000045947, ENSDARG00000009447, ENSDARG00000022995, ENSDARG00000008398, ENSDARG00000023797, ENSDARG00000075914, ENSDARG00000014313, ENSDARG00000089913, ENSDARG00000002791, ENSDARG00000056008, ENSDARG00000001803, ENSDARG00000045514, ENSDARG00000010149, ENSDARG00000029439, ENSDARG00000003706, ENSDARG00000017775, ENSDARG00000073952, ENSDARG00000045886	410	475	14912	1.5314	1	0.552583	63.7366
GOTERM_BP_DIRECT	GO:0070588~calcium ion transmembrane transport	6	1.2024	0.0657538	ENSDARG00000071331, ENSDARG00000008398, ENSDARG00000029439, ENSDARG00000003706, ENSDARG00000023797, ENSDARG00000089913	410	79	14912	2.76233	1	0.547746	63.8924
GOTERM_CC_DIRECT	GO:0030427~site of polarized growth	2	0.400802	0.0723574	ENSDARG00000013921, ENSDARG00000056001	377	3	15208	26.893	0.999963	0.280724	58.5922
GOTERM_MF_DIRECT	GO:0051287~NAD binding	4	0.801603	0.0746951	ENSDARG00000039914, ENSDARG00000036438, ENSDARG00000043457, ENSDARG00000023536	410	38	15797	4.05571	1	0.515795	65.4926
GOTERM_BP_DIRECT	GO:0007517~muscle organ development	4	0.801603	0.075186	ENSDARG00000008433, ENSDARG00000029150, ENSDARG00000010478, ENSDARG00000039256	410	36	14912	4.04119	1	0.591873	68.9834
GOTERM_MF_DIRECT	GO:0080130~L-phenylalanine:2-oxoglutarate aminotransferase activity	2	0.400802	0.075684	ENSDARG00000005840, ENSDARG00000041068	410	3	15797	25.6862	1	0.511484	65.9946
GOTERM_MF_DIRECT	GO:0008097~5S rRNA binding	2	0.400802	0.075684	ENSDARG00000020197, ENSDARG00000015862	410	3	15797	25.6862	1	0.511484	65.9946
GOTERM_MF_DIRECT	GO:0008307~structural constituent of muscle	2	0.400802	0.075684	ENSDARG00000000563, ENSDARG00000028213	410	3	15797	25.6862	1	0.511484	65.9946
GOTERM_MF_DIRECT	GO:0048763~calcium-induced calcium release activity	2	0.400802	0.075684	ENSDARG00000071331, ENSDARG00000023797	410	3	15797	25.6862	1	0.511484	65.9946
GOTERM_MF_DIRECT	GO:0004739~pyruvate dehydrogenase (acetyl-transferring) activity	2	0.400802	0.075684	ENSDARG00000012387, ENSDARG00000021346	410	3	15797	25.6862	1	0.511484	65.9946
GOTERM_BP_DIRECT	GO:0019752~carboxylic acid metabolic process	3	0.601202	0.0778369	ENSDARG00000043371, ENSDARG00000019644, ENSDARG00000017772	410	17	14912	6.41836	1	0.598818	70.2886
GOTERM_BP_DIRECT	GO:0070650~actin filament bundle distribution	2	0.400802	0.0800518	ENSDARG00000010784, ENSDARG00000000103	410	3	14912	24.2472	1	0.603377	71.3396
GOTERM_BP_DIRECT	GO:0055015~ventricular cardiac muscle cell development	2	0.400802	0.0800518	ENSDARG00000019096, ENSDARG00000032976	410	3	14912	24.2472	1	0.603377	71.3396
GOTERM_BP_DIRECT	GO:0090527~actin filament reorganization	2	0.400802	0.0800518	ENSDARG00000013921, ENSDARG00000056001	410	3	14912	24.2472	1	0.603377	71.3396
GOTERM_BP_DIRECT	GO:0055010~ventricular cardiac muscle tissue morphogenesis	2	0.400802	0.0800518	ENSDARG00000020610, ENSDARG00000011615	410	3	14912	24.2472	1	0.603377	71.3396
GOTERM_BP_DIRECT	GO:0042776~mitochondrial ATP synthesis coupled proton transport	2	0.400802	0.0800518	ENSDARG00000038075, ENSDARG00000068738	410	3	14912	24.2472	1	0.603377	71.3396
GOTERM_BP_DIRECT	GO:0003203~endocardial cushion morphogenesis	2	0.400802	0.0800518	ENSDARG00000042535, ENSDARG00000076126	410	3	14912	24.2472	1	0.603377	71.3396
GOTERM_BP_DIRECT	GO:0006105~succinate metabolic process	2	0.400802	0.0800518	ENSDARG00000052712, ENSDARG00000016721	410	3	14912	24.2472	1	0.603377	71.3396
GOTERM_MF_DIRECT	GO:0016829~lyase activity	6	1.2024	0.0841176	ENSDARG00000007294, ENSDARG00000043856, ENSDARG00000034470, ENSDARG00000011665, ENSDARG00000019702, ENSDARG00000075132	410	90	15797	2.56862	1	0.541512	70.0091
GOTERM_MF_DIRECT	GO:0005524~ATP binding	53	10.6212	0.0910249	ENSDARG00000039929, ENSDARG00000029150, ENSDARG00000039256, ENSDARG00000039392, ENSDARG00000070083, ENSDARG00000068992, ENSDARG00000013343, ENSDARG00000036371, ENSDARG00000086933, ENSDARG00000055412, ENSDARG00000008413, ENSDARG00000061862, ENSDARG00000029688, ENSDARG00000062082, ENSDARG00000000563, ENSDARG00000004754, ENSDARG00000042535, ENSDARG00000001950, ENSDARG00000076075, ENSDARG00000029439,…	410	1668	15797	1.22425	1	0.562356	72.9648
GOTERM_BP_DIRECT	GO:0060048~cardiac muscle contraction	3	0.601202	0.0944652	ENSDARG00000023963, ENSDARG00000011400, ENSDARG00000052708	410	19	14912	5.74275	1	0.661003	77.3762
GOTERM_CC_DIRECT	GO:0034704~calcium channel complex	2	0.400802	0.0952968	ENSDARG00000071331, ENSDARG00000023797	377	4	15208	20.1698	0.999999	0.346642	69.1379
GOTERM_CC_DIRECT	GO:0005790~smooth endoplasmic reticulum	2	0.400802	0.0952968	ENSDARG00000071331, ENSDARG00000023797	377	4	15208	20.1698	0.999999	0.346642	69.1379
GOTERM_MF_DIRECT	GO:0003924~GTPase activity	8	1.60321	0.0977246	ENSDARG00000020850, ENSDARG00000031164, ENSDARG00000002344, ENSDARG00000040778, ENSDARG00000057026, ENSDARG00000045367, ENSDARG00000035256, ENSDARG00000079504	410	151	15797	2.04129	1	0.580715	75.5716
GOTERM_MF_DIRECT	GO:0046538~2,3-bisphosphoglycerate-dependent phosphoglycerate mutase activity	2	0.400802	0.09962	ENSDARG00000005423, ENSDARG00000057571	410	4	15797	19.2646	1	0.579517	76.2656
GOTERM_MF_DIRECT	GO:0004619~phosphoglycerate mutase activity	2	0.400802	0.09962	ENSDARG00000005423, ENSDARG00000057571	410	4	15797	19.2646	1	0.579517	76.2656
GOTERM_MF_DIRECT	GO:0016615~malate dehydrogenase activity	2	0.400802	0.09962	ENSDARG00000043371, ENSDARG00000017772	410	4	15797	19.2646	1	0.579517	76.2656
GOTERM_MF_DIRECT	GO:0008177~succinate dehydrogenase (ubiquinone) activity	2	0.400802	0.09962	ENSDARG00000075768, ENSDARG00000016721	410	4	15797	19.2646	1	0.579517	76.2656
GOTERM_MF_DIRECT	GO:0004069~L-aspartate:2-oxoglutarate aminotransferase activity	2	0.400802	0.09962	ENSDARG00000005840, ENSDARG00000041068	410	4	15797	19.2646	1	0.579517	76.2656
GOTERM_MF_DIRECT	GO:0043236~laminin binding	2	0.400802	0.09962	ENSDARG00000019181, ENSDARG00000054942	410	4	15797	19.2646	1	0.579517	76.2656
GOTERM_MF_DIRECT	GO:0004082~bisphosphoglycerate mutase activity	2	0.400802	0.09962	ENSDARG00000005423, ENSDARG00000057571	410	4	15797	19.2646	1	0.579517	76.2656
GOTERM_MF_DIRECT	GO:0030060~L-malate dehydrogenase activity	2	0.400802	0.09962	ENSDARG00000043371, ENSDARG00000017772	410	4	15797	19.2646	1	0.579517	76.2656

## Sheet: GO-terms Up Cl2 p<0.01
Category	Term	Count	%	PValue	Genes	List Total	Pop Hits	Pop Total	Fold Enrichment	Bonferroni	Benjamini	FDR
GOTERM_CC_DIRECT	GO:0070469~respiratory chain	8	80	2.36242e-19	ENSDARG00000063905, ENSDARG00000063921, ENSDARG00000063924, ENSDARG00000063914, ENSDARG00000063899, ENSDARG00000063917, ENSDARG00000063908, ENSDARG00000063895	10	23	15208	528.974	2.59867e-18	2.59867e-18	1.47167e-16
GOTERM_CC_DIRECT	GO:0005739~mitochondrion	10	100	5.37602e-14	ENSDARG00000063905, ENSDARG00000063921, ENSDARG00000063924, ENSDARG00000063911, ENSDARG00000063912, ENSDARG00000063914, ENSDARG00000063899, ENSDARG00000063917, ENSDARG00000063908, ENSDARG00000063895	10	514	15208	29.5875	5.91083e-13	2.95541e-13	3.34732e-11
GOTERM_CC_DIRECT	GO:0005743~mitochondrial inner membrane	8	80	2.92869e-13	ENSDARG00000063905, ENSDARG00000063921, ENSDARG00000063924, ENSDARG00000063911, ENSDARG00000063912, ENSDARG00000063899, ENSDARG00000063908, ENSDARG00000063895	10	151	15208	80.5722	3.22165e-12	1.07392e-12	1.82443e-10
GOTERM_MF_DIRECT	GO:0016491~oxidoreductase activity	9	90	1.87324e-11	ENSDARG00000063905, ENSDARG00000063921, ENSDARG00000063924, ENSDARG00000063912, ENSDARG00000063914, ENSDARG00000063899, ENSDARG00000063917, ENSDARG00000063908, ENSDARG00000063895	10	553	15797	25.7094	2.06057e-10	2.06057e-10	1.16693e-08
GOTERM_BP_DIRECT	GO:0055114~oxidation-reduction process	9	90	7.0397e-11	ENSDARG00000063905, ENSDARG00000063921, ENSDARG00000063924, ENSDARG00000063912, ENSDARG00000063914, ENSDARG00000063899, ENSDARG00000063917, ENSDARG00000063908, ENSDARG00000063895	10	616	14912	21.787	1.26715e-09	1.26715e-09	5.18913e-08
GOTERM_MF_DIRECT	GO:0008137~NADH dehydrogenase (ubiquinone) activity	5	50	1.14651e-09	ENSDARG00000063921, ENSDARG00000063914, ENSDARG00000063899, ENSDARG00000063917, ENSDARG00000063895	10	29	15797	272.362	1.26116e-08	6.30581e-09	7.14217e-07
GOTERM_BP_DIRECT	GO:0006810~transport	9	90	8.3144e-09	ENSDARG00000063905, ENSDARG00000063921, ENSDARG00000063924, ENSDARG00000063911, ENSDARG00000063914, ENSDARG00000063899, ENSDARG00000063917, ENSDARG00000063908, ENSDARG00000063895	10	1120	14912	11.9829	1.49659e-07	7.48296e-08	6.12874e-06
GOTERM_CC_DIRECT	GO:0045277~respiratory chain complex IV	3	30	9.33694e-07	ENSDARG00000063905, ENSDARG00000063912, ENSDARG00000063908	10	3	15208	1520.8	1.02706e-05	2.56766e-06	0.000581641
GOTERM_BP_DIRECT	GO:0042773~ATP synthesis coupled electron transport	3	30	4.85107e-06	ENSDARG00000063921, ENSDARG00000063917, ENSDARG00000063908	10	6	14912	745.6	8.73156e-05	2.9106e-05	0.00357578
GOTERM_MF_DIRECT	GO:0004129~cytochrome-c oxidase activity	3	30	0.000116217	ENSDARG00000063905, ENSDARG00000063912, ENSDARG00000063908	10	29	15797	163.417	0.00127765	0.000426065	0.0723754
GOTERM_CC_DIRECT	GO:0016021~integral component of membrane	10	100	0.000301123	ENSDARG00000063905, ENSDARG00000063921, ENSDARG00000063924, ENSDARG00000063911, ENSDARG00000063912, ENSDARG00000063914, ENSDARG00000063899, ENSDARG00000063917, ENSDARG00000063908, ENSDARG00000063895	10	6180	15208	2.46084	0.00330738	0.000662352	0.187436
GOTERM_CC_DIRECT	GO:0016020~membrane	10	100	0.000313181	ENSDARG00000063905, ENSDARG00000063921, ENSDARG00000063924, ENSDARG00000063911, ENSDARG00000063912, ENSDARG00000063914, ENSDARG00000063899, ENSDARG00000063917, ENSDARG00000063908, ENSDARG00000063895	10	6207	15208	2.45014	0.0034396	0.00057409	0.194935
GOTERM_BP_DIRECT	GO:0022904~respiratory electron transport chain	2	20	0.00421799	ENSDARG00000063924, ENSDARG00000063912	10	7	14912	426.057	0.073262	0.0188413	3.06771
GOTERM_BP_DIRECT	GO:0006120~mitochondrial electron transport, NADH to ubiquinone	2	20	0.00542022	ENSDARG00000063899, ENSDARG00000063917	10	9	14912	331.378	0.0931964	0.0193757	3.92705
GOTERM_CC_DIRECT	GO:0005747~mitochondrial respiratory chain complex I	2	20	0.0123625	ENSDARG00000063914, ENSDARG00000063895	10	21	15208	144.838	0.127886	0.019358	7.45653
GOTERM_CC_DIRECT	GO:0031966~mitochondrial membrane	2	20	0.0199472	ENSDARG00000063914, ENSDARG00000063917	10	34	15208	89.4588	0.198794	0.0273244	11.7959
GOTERM_MF_DIRECT	GO:0009055~electron carrier activity	2	20	0.0270237	ENSDARG00000063905, ENSDARG00000063924	10	48	15797	65.8208	0.260182	0.0725698	15.6892
