# Supplementary material for: Single-cell analysis uncovers that metabolic reprogramming by ErbB2 signaling is essential for cardiomyocyte proliferation in the regenerating heart
Source: eLife. 2019 Dec 23;8:e50163. doi: 10.7554/eLife.50163 (PMC7000220; doi:10.7554/eLife.50163)
Supplement: Figure 2—source data 2. [file elife-50163-fig2-data2.xls]

CELLID	cluster
FK_A_A6	1
FK_A_A10	1
FK_A_B1	1
FK_A_B18	1
FK_A_C2	1
FK_A_D1	1
FK_A_D5	1
FK_A_E2	1
FK_A_E16	1
FK_A_E23	1
FK_A_F23	1
FK_A_H5	1
FK_A_I2	1
FK_A_I3	1
FK_A_I8	1
FK_A_I13	1
FK_A_I18	1
FK_A_I19	1
FK_A_J1	1
FK_A_J4	1
FK_A_J5	1
FK_A_J9	1
FK_A_J10	1
FK_A_J16	1
FK_A_K2	1
FK_A_K3	1
FK_A_K12	1
FK_A_K20	1
FK_A_L21	1
FK_A_M11	1
FK_A_M19	1
FK_A_N6	1
FK_A_N14	1
FK_A_N22	1
FK_A_P8	1
FK_A_P13	1
FK_B_A1	1
FK_B_A2	1
FK_B_A3	1
FK_B_A19	1
FK_B_B10	1
FK_B_B11	1
FK_B_B13	1
FK_B_B20	1
FK_B_B21	1
FK_B_B24	1
FK_B_C8	1
FK_B_C11	1
FK_B_C16	1
FK_B_D5	1
FK_B_D23	1
FK_B_E2	1
FK_B_E4	1
FK_B_E11	1
FK_B_F2	1
FK_B_F9	1
FK_B_G3	1
FK_B_G9	1
FK_B_G23	1
FK_B_H11	1
FK_B_H23	1
FK_B_I2	1
FK_B_I4	1
FK_B_I7	1
FK_B_I13	1
FK_B_I23	1
FK_B_J9	1
FK_B_J10	1
FK_B_K2	1
FK_B_K3	1
FK_B_K6	1
FK_B_L6	1
FK_B_L10	1
FK_B_L13	1
FK_B_L24	1
FK_B_M3	1
FK_B_M6	1
FK_B_M9	1
FK_B_M12	1
FK_B_M21	1
FK_B_N8	1
FK_B_N12	1
FK_B_O2	1
FK_B_O4	1
FK_B_O14	1
FK_B_O15	1
FK_B_P15	1
LG_2A_J23	1
LG_2B_P18	1
LG_2A_B20	2
LG_2A_B24	2
LG_2A_C4	2
LG_2A_E12	2
LG_2A_G7	2
LG_2A_G13	2
LG_2A_I3	2
LG_2A_K10	2
LG_2A_L19	2
LG_2A_M2	2
LG_2A_M8	2
LG_2A_O22	2
LG_2B_A10	2
LG_2B_B4	2
LG_2B_E14	2
LG_2B_H23	2
LG_2B_I13	2
LG_2B_K14	2
LG_2B_L4	2
LG_2B_L20	2
LG_2B_L22	2
LG_2B_M4	2
LG_2B_N1	2
LG_2B_N14	2
LG_2B_P1	2
LG_2B_P6	2
LG_2B_P21	2
FK_A_A15	3
FK_A_A19	3
FK_A_A23	3
FK_A_B7	3
FK_A_B8	3
FK_A_B23	3
FK_A_C11	3
FK_A_C17	3
FK_A_C24	3
FK_A_D2	3
FK_A_D10	3
FK_A_D16	3
FK_A_D17	3
FK_A_D18	3
FK_A_D19	3
FK_A_D20	3
FK_A_E10	3
FK_A_E11	3
FK_A_F20	3
FK_A_G3	3
FK_A_H3	3
FK_A_I16	3
FK_A_J24	3
FK_A_K4	3
FK_A_K8	3
FK_A_L5	3
FK_A_L9	3
FK_A_L15	3
FK_A_M3	3
FK_A_M5	3
FK_A_N1	3
FK_A_P9	3
FK_A_P12	3
FK_B_A15	3
FK_B_B8	3
FK_B_B9	3
FK_B_B12	3
FK_B_C4	3
FK_B_C7	3
FK_B_C15	3
FK_B_C18	3
FK_B_D2	3
FK_B_D6	3
FK_B_E10	3
FK_B_E17	3
FK_B_F3	3
FK_B_F15	3
FK_B_F16	3
FK_B_F19	3
FK_B_F20	3
FK_B_G5	3
FK_B_H9	3
FK_B_I17	3
FK_B_J2	3
FK_B_K16	3
FK_B_K18	3
FK_B_K24	3
FK_B_L22	3
FK_B_N4	3
FK_B_N10	3
FK_B_N21	3
FK_B_O11	3
FK_B_O17	3
FK_B_P6	3
LG_2A_A10	4
LG_2A_A15	4
LG_2A_A20	4
LG_2A_C6	4
LG_2A_C22	4
LG_2A_C24	4
LG_2A_D14	4
LG_2A_F12	4
LG_2A_F17	4
LG_2A_F21	4
LG_2A_F23	4
LG_2A_G10	4
LG_2A_G18	4
LG_2A_G22	4
LG_2A_H12	4
LG_2A_I12	4
LG_2A_I21	4
LG_2A_I22	4
LG_2A_J17	4
LG_2A_L21	4
LG_2A_M20	4
LG_2A_N4	4
LG_2A_N24	4
LG_2A_O6	4
LG_2A_O21	4
LG_2B_A12	4
LG_2B_A20	4
LG_2B_B5	4
LG_2B_B16	4
LG_2B_B21	4
LG_2B_B24	4
LG_2B_C9	4
LG_2B_C14	4
LG_2B_C22	4
LG_2B_D5	4
LG_2B_E1	4
LG_2B_E6	4
LG_2B_E10	4
LG_2B_E12	4
LG_2B_E20	4
LG_2B_E24	4
LG_2B_F1	4
LG_2B_F2	4
LG_2B_F19	4
LG_2B_G10	4
LG_2B_G19	4
LG_2B_G20	4
LG_2B_H17	4
LG_2B_H22	4
LG_2B_I11	4
LG_2B_I19	4
LG_2B_I20	4
LG_2B_J7	4
LG_2B_J8	4
LG_2B_J12	4
LG_2B_J23	4
LG_2B_K8	4
LG_2B_L1	4
LG_2B_L2	4
LG_2B_L11	4
LG_2B_M7	4
LG_2B_M9	4
LG_2B_M19	4
LG_2B_M23	4
LG_2B_O4	4
LG_2B_P11	4
FK_A_B6	5
FK_A_I20	5
FK_A_I23	5
FK_A_K22	5
FK_A_K23	5
FK_A_L8	5
FK_A_L11	5
FK_A_L20	5
FK_A_N5	5
FK_A_P3	5
FK_B_A12	5
FK_B_A16	5
FK_B_B6	5
FK_B_B23	5
FK_B_C2	5
FK_B_C5	5
FK_B_C9	5
FK_B_C23	5
FK_B_D22	5
FK_B_D24	5
FK_B_E15	5
FK_B_F8	5
FK_B_G22	5
FK_B_H21	5
FK_B_I3	5
FK_B_I10	5
FK_B_I22	5
FK_B_J1	5
FK_B_J7	5
FK_B_J11	5
FK_B_J19	5
FK_B_J21	5
FK_B_K1	5
FK_B_K4	5
FK_B_K5	5
FK_B_K15	5
FK_B_K20	5
FK_B_L1	5
FK_B_M16	5
FK_B_M23	5
FK_B_N1	5
FK_B_N9	5
FK_B_N11	5
FK_B_N17	5
FK_B_P11	5
FK_B_P13	5
FK_B_C10	6
LG_2A_A21	6
LG_2A_B23	6
LG_2A_C5	6
LG_2A_C9	6
LG_2A_C13	6
LG_2A_D12	6
LG_2A_D17	6
LG_2A_E22	6
LG_2A_F4	6
LG_2A_F10	6
LG_2A_H18	6
LG_2A_H20	6
LG_2A_I11	6
LG_2A_I15	6
LG_2A_I16	6
LG_2A_J11	6
LG_2A_J19	6
LG_2A_J21	6
LG_2A_K15	6
LG_2A_M13	6
LG_2A_N13	6
LG_2A_N20	6
LG_2A_O8	6
LG_2A_O23	6
LG_2A_O24	6
LG_2B_A4	6
LG_2B_A6	6
LG_2B_A21	6
LG_2B_B23	6
LG_2B_C10	6
LG_2B_C11	6
LG_2B_C23	6
LG_2B_D1	6
LG_2B_D12	6
LG_2B_D14	6
LG_2B_D18	6
LG_2B_D22	6
LG_2B_F12	6
LG_2B_F21	6
LG_2B_H19	6
LG_2B_I4	6
LG_2B_I16	6
LG_2B_I22	6
LG_2B_J14	6
LG_2B_J20	6
LG_2B_K10	6
LG_2B_K24	6
LG_2B_L12	6
LG_2B_L18	6
LG_2B_N18	6
LG_2B_O7	6
LG_2B_O24	6
LG_2B_P10	6
LG_2B_P15	6
LG_2A_A3	7
LG_2A_A17	7
LG_2A_A22	7
LG_2A_B6	7
LG_2A_C20	7
LG_2A_E18	7
LG_2A_F6	7
LG_2A_M5	7
LG_2A_M7	7
LG_2A_M21	7
LG_2B_A18	7
LG_2B_A24	7
LG_2B_B9	7
LG_2B_B22	7
LG_2B_C13	7
LG_2B_C15	7
LG_2B_D2	7
LG_2B_D3	7
LG_2B_D13	7
LG_2B_D19	7
LG_2B_H18	7
LG_2B_I7	7
LG_2B_I9	7
LG_2B_I12	7
LG_2B_I14	7
LG_2B_J1	7
LG_2B_J2	7
LG_2B_J24	7
LG_2B_K15	7
LG_2B_K18	7
LG_2B_L10	7
LG_2B_M14	7
LG_2B_N10	7
LG_2B_N15	7
LG_2B_N24	7
LG_2B_P9	7
FK_A_A1	8
FK_A_A3	8
FK_A_A5	8
FK_A_A14	8
FK_A_B3	8
FK_A_B10	8
FK_A_B12	8
FK_A_B20	8
FK_A_B22	8
FK_A_D3	8
FK_A_D21	8
FK_A_D23	8
FK_A_E3	8
FK_A_E4	8
FK_A_E6	8
FK_A_E17	8
FK_A_E20	8
FK_A_F4	8
FK_A_F9	8
FK_A_F10	8
FK_A_G2	8
FK_A_G23	8
FK_A_H1	8
FK_A_H9	8
FK_A_H21	8
FK_A_H22	8
FK_A_I22	8
FK_A_J2	8
FK_A_J7	8
FK_A_J20	8
FK_A_M7	8
FK_A_M8	8
FK_A_N12	8
FK_A_N24	8
FK_A_O2	8
FK_A_O12	8
FK_A_P15	8
FK_A_P17	8
FK_B_B18	8
FK_B_B22	8
FK_B_C3	8
FK_B_C19	8
FK_B_D21	8
FK_B_E20	8
FK_B_E23	8
FK_B_F5	8
FK_B_H7	8
FK_B_H20	8
FK_B_I6	8
FK_B_I16	8
FK_B_I19	8
FK_B_J4	8
FK_B_J6	8
FK_B_J18	8
FK_B_K8	8
FK_B_L7	8
FK_B_L21	8
FK_B_L23	8
FK_B_M7	8
FK_B_M15	8
FK_B_M18	8
FK_B_M19	8
FK_B_N13	8
FK_B_N14	8
FK_B_N15	8
FK_B_N19	8
FK_B_P8	8
FK_B_P14	8
FK_A_I4	9
FK_A_L12	9
FK_A_M12	9
FK_A_O4	9
FK_B_A8	9
FK_B_A14	9
FK_B_B16	9
FK_B_C6	9
FK_B_G2	9
FK_B_G13	9
FK_B_H13	9
FK_B_H14	9
FK_B_K13	9
FK_B_K22	9
LG_2A_D24	10
LG_2A_F19	10
LG_2A_F20	10
LG_2A_G24	10
LG_2A_I4	10
LG_2A_I24	10
LG_2A_K4	10
LG_2A_K6	10
LG_2A_M10	10
LG_2A_P19	10
LG_2B_A15	10
LG_2B_A16	10
LG_2B_B18	10
LG_2B_B20	10
LG_2B_C20	10
LG_2B_E22	10
LG_2B_F8	10
LG_2B_F24	10
LG_2B_H10	10
LG_2B_I6	10
LG_2B_I23	10
LG_2B_J19	10
LG_2B_K9	10
LG_2B_K20	10
LG_2B_M6	10
LG_2B_M10	10
LG_2B_M12	10
LG_2B_M15	10
LG_2B_N17	10
FK_A_A12	11
FK_A_B9	11
FK_A_B11	11
FK_A_B13	11
FK_A_B16	11
FK_A_F5	11
FK_A_F17	11
FK_A_G20	11
FK_A_H7	11
FK_A_I21	11
FK_A_J23	11
FK_A_K16	11
FK_A_M4	11
FK_A_M13	11
FK_A_N11	11
FK_A_O18	11
FK_B_B17	11
FK_B_L19	11
FK_B_O12	11
FK_B_N24	12
LG_2A_A11	12
LG_2A_A23	12
LG_2A_C23	12
LG_2A_E6	12
LG_2A_G17	12
LG_2A_H24	12
LG_2A_I1	12
LG_2A_J14	12
LG_2A_K21	12
LG_2A_L11	12
LG_2A_L14	12
LG_2A_M23	12
LG_2A_M24	12
LG_2A_N15	12
LG_2A_N19	12
LG_2A_O3	12
LG_2A_O5	12
LG_2B_A11	12
LG_2B_A23	12
LG_2B_B1	12
LG_2B_B3	12
LG_2B_D7	12
LG_2B_D16	12
LG_2B_D23	12
LG_2B_F10	12
LG_2B_F14	12
LG_2B_G13	12
LG_2B_G17	12
LG_2B_H20	12
LG_2B_I18	12
LG_2B_J5	12
LG_2B_J21	12
LG_2B_K22	12
LG_2B_L8	12
LG_2B_L23	12
LG_2B_N23	12
LG_2B_O22	12
LG_2B_P2	12
LG_2A_A12	13
LG_2A_A14	13
LG_2A_H22	13
LG_2A_I13	13
LG_2A_J20	13
LG_2A_M12	13
LG_2A_M16	13
LG_2A_O15	13
LG_2B_A17	13
LG_2B_G9	13
LG_2B_G24	13
LG_2B_J3	13
LG_2B_K6	13
LG_2B_M20	13
LG_2B_P5	13
FK_A_A18	14
FK_B_A13	14
FK_B_D13	14
FK_B_L8	14
FK_B_O16	14
FK_A_A8	15
FK_A_E5	15
LG_2A_G19	16
LG_2A_G20	16
LG_2A_H15	16
LG_2B_G16	16
LG_2A_A6	17
LG_2A_A16	17
LG_2A_A24	17
LG_2A_I19	17
LG_2B_A7	17
LG_2B_A22	17
LG_2B_G4	17
LG_2B_I15	17
LG_2B_J6	17
LG_2B_J17	17
LG_2B_M8	17
LG_2B_M16	17
LG_2B_N13	17
LG_2B_N22	17
LG_2B_P13	18
LG_2A_H4	19
LG_2B_A14	19
LG_2B_J11	20
LG_2A_B22	21
LG_2A_J10	21
LG_2A_L15	21
LG_2B_F16	21
LG_2B_G8	21
FK_A_M18	22
LG_2A_B12	23
LG_2B_H2	23
LG_2B_I21	23
LG_2B_M21	23
LG_2A_I2	24
FK_A_G9	25
LG_2B_B6	26
LG_2B_D24	26
LG_2B_B10	27
