# Supplementary material for: Single-cell analysis uncovers that metabolic reprogramming by ErbB2 signaling is essential for cardiomyocyte proliferation in the regenerating heart
Source: eLife. 2019 Dec 23;8:e50163. doi: 10.7554/eLife.50163 (PMC7000220; doi:10.7554/eLife.50163)
Supplement: Figure 2—source data 3. — Raw reads represented per gene (rows) and single cell (columns). [file elife-50163-fig2-data3.csv]

	FK_A_A1	FK_A_A2	FK_A_A3	FK_A_A4	FK_A_A5	FK_A_A6	FK_A_A7	FK_A_A8	FK_A_A9	FK_A_A10	FK_A_A11	FK_A_A12	FK_A_A13	FK_A_A14	FK_A_A15	FK_A_A16	FK_A_A17	FK_A_A18	FK_A_A19	FK_A_A20	FK_A_A21	FK_A_A22	FK_A_A23	FK_A_A24	FK_A_B1	FK_A_B2	FK_A_B3	FK_A_B4	FK_A_B5	FK_A_B6	FK_A_B7	FK_A_B8	FK_A_B9	FK_A_B10	FK_A_B11	FK_A_B12	FK_A_B13	FK_A_B14	FK_A_B15	FK_A_B16	FK_A_B17	FK_A_B18	FK_A_B19	FK_A_B20	FK_A_B21	FK_A_B22	FK_A_B23	FK_A_B24	FK_A_C1
ENSDARG00000000002	0	0	0	0	0	0	0	0	0	4.001954397	0	1.00012209	0	0	4.001954397	0	0	13.02067364	0	0	0	0	11.01479701	0	1.00012209	0	0	0	0	0	0	1.00012209	0	0	2.00048844	0	0	0	0	0	0	1.00012209	0	0	0	0	21.05401772	0	0
ENSDARG00000000018	0	0	0	0	0	0	2.00048844	0	0	0	0	0	0	0	0	0	0	1.00012209	0	0	0	0	1.00012209	0	0	0	0	0	0	0	0	3.00109917	1.00012209	0	0	0	0	0	0	0	0	0	0	0	0	0	4.001954397	0	0
ENSDARG00000000019	1.00012209	0	0	0	0	0	0	1.00012209	0	1.00012209	0	0	0	0	0	0	0	3.00109917	0	0	0	0	1.00012209	0	0	0	0	1.00012209	0	0	0	0	0	0	0	0	1.00012209	0	0	2.00048844	0	0	0	0	0	0	7.005988269	0	0
ENSDARG00000000068	0	0	1.00012209	0	0	0	0	0	0	0	0	0	0	0	0	0	0	1.00012209	0	0	0	0	0	0	0	0	0	0	0	0	0	0	0	0	0	0	0	0	0	0	0	0	0	0	0	0	0	0	0
ENSDARG00000000069	0	0	0	0	0	0	0	1.00012209	0	0	0	0	0	0	0	0	0	10.01222694	0	0	0	0	0	0	0	0	0	0	1.00012209	0	1.00012209	0	0	0	0	0	0	0	0	0	0	0	0	0	0	0	3.00109917	0	0
ENSDARG00000000086	0	0	0	0	0	0	0	0	0	1.00012209	0	0	0	0	0	0	0	4.001954397	1.00012209	0	0	0	0	0	0	0	0	0	0	0	0	0	0	0	2.00048844	0	0	0	0	0	0	0	0	0	0	0	2.00048844	0	0
ENSDARG00000000103	0	0	0	0	0	1.00012209	0	0	0	1.00012209	0	0	0	0	0	1.00012209	0	16.03133162	0	0	1.00012209	0	2.00048844	0	5.003054244	0	0	0	0	0	0	0	1.00012209	0	4.001954397	0	6.004398828	0	0	1.00012209	0	6.004398828	0	4.001954397	0	0	2.00048844	0	0
ENSDARG00000000142	0	0	0	0	0	0	0	0	0	0	0	0	0	0	0	0	0	0	1.00012209	0	0	0	0	0	0	0	0	0	0	0	0	0	1.00012209	0	0	0	0	0	0	0	0	0	0	0	0	0	0	0	0
ENSDARG00000000151	0	0	0	0	0	0	0	0	0	0	0	0	0	0	0	0	0	0	0	0	0	0	0	0	0	0	0	0	0	0	0	0	0	0	0	0	0	0	0	0	0	0	0	0	0	0	0	0	0
ENSDARG00000000161	0	0	0	0	0	0	0	0	0	0	0	0	0	0	0	0	0	0	0	0	0	0	0	0	0	0	0	0	0	0	0	0	0	0	0	0	0	0	0	0	0	0	0	0	0	0	0	0	0
ENSDARG00000000183	0	0	0	0	0	0	0	0	0	0	0	0	0	0	0	0	0	0	0	0	0	0	0	0	0	0	0	0	0	0	0	0	0	0	0	0	0	0	0	0	0	0	0	0	0	0	0	0	0
ENSDARG00000000189	0	0	0	0	0	0	0	0	0	0	0	0	0	0	0	0	0	1.00012209	0	0	0	0	0	0	0	0	0	0	0	0	0	0	0	0	0	0	0	0	0	1.00012209	0	0	0	0	0	0	0	0	0
ENSDARG00000000229	0	0	0	0	0	0	0	0	0	1.00012209	0	0	0	0	0	0	0	0	0	0	0	0	0	0	0	0	0	0	0	0	0	0	0	0	0	0	0	0	0	0	0	0	0	0	0	0	0	0	0
ENSDARG00000000241	5.003054244	1.00012209	0	0	0	0	0	0	0	1.00012209	0	0	0	0	0	0	0	3.00109917	1.00012209	0	0	0	0	0	0	0	0	0	0	0	1.00012209	0	0	0	0	0	0	0	0	0	0	0	0	0	0	0	0	0	0
ENSDARG00000000324	0	0	0	0	0	0	0	0	0	0	0	0	0	0	0	0	0	0	0	0	0	0	1.00012209	0	0	0	0	0	0	0	0	1.00012209	0	0	1.00012209	0	0	0	0	0	3.00109917	0	0	0	0	0	0	0	0
ENSDARG00000000349	0	0	0	0	0	0	0	0	0	0	0	0	0	0	0	0	0	0	0	0	0	0	0	0	0	0	0	0	0	0	0	0	0	0	0	0	0	0	0	0	0	0	0	0	0	0	0	0	0
ENSDARG00000000369	0	0	0	0	0	0	0	0	0	0	0	0	0	0	0	0	0	0	0	0	0	0	0	0	0	0	0	0	0	0	0	0	0	0	0	0	0	0	0	0	0	0	0	0	0	0	0	0	0
ENSDARG00000000370	0	0	0	0	0	0	0	0	0	1.00012209	0	0	0	0	0	0	0	0	0	0	0	0	0	0	0	0	0	0	0	0	0	0	0	0	0	0	0	0	0	0	0	0	0	0	0	0	0	0	0
ENSDARG00000000384	1.00012209	0	0	0	0	0	0	0	0	2.00048844	0	0	0	0	0	0	0	0	0	0	0	0	0	0	0	0	0	0	0	0	0	0	0	0	0	0	0	0	0	0	0	0	0	0	0	0	0	0	0
ENSDARG00000000394	0	0	0	0	0	0	0	0	0	2.00048844	0	0	0	0	1.00012209	0	0	1.00012209	0	0	0	0	0	0	0	0	0	0	0	0	1.00012209	0	1.00012209	0	0	0	0	0	0	0	0	0	0	1.00012209	0	0	4.001954397	0	0
ENSDARG00000000423	0	0	0	0	0	0	0	0	0	0	0	0	0	0	0	0	0	0	0	0	0	0	0	0	0	0	0	0	0	0	0	0	0	0	0	0	0	0	0	0	0	0	0	0	0	0	0	0	0
ENSDARG00000000442	0	0	0	0	0	0	0	0	0	2.00048844	0	1.00012209	0	0	0	0	0	0	0	0	0	0	4.001954397	0	1.00012209	0	0	0	0	0	0	1.00012209	2.00048844	0	0	0	0	0	0	0	0	0	0	0	0	0	0	0	0
ENSDARG00000000460	0	0	0	0	0	0	0	0	0	0	0	0	0	0	0	0	0	0	0	0	0	0	0	0	0	0	0	0	0	0	0	0	0	0	0	0	0	0	0	0	0	0	0	0	0	0	0	0	0
ENSDARG00000000476	0	0	0	0	0	0	0	0	0	0	0	0	0	0	0	0	0	0	0	0	0	0	0	0	0	0	0	0	0	0	0	0	0	0	1.00012209	0	0	0	0	0	0	0	0	0	0	0	0	0	0
ENSDARG00000000489	0	0	0	0	0	1.00012209	0	0	0	2.00048844	0	1.00012209	0	0	0	0	0	0	2.00048844	0	0	0	0	0	0	0	0	0	0	0	0	0	1.00012209	0	0	0	0	0	0	0	0	0	0	0	0	0	3.00109917	0	0
ENSDARG00000000503	0	0	0	0	0	0	0	0	0	0	0	0	0	0	0	0	0	0	0	0	0	0	0	0	0	0	0	0	0	0	0	0	0	0	0	0	0	0	0	0	0	0	0	0	0	0	0	0	0
ENSDARG00000000516	0	0	0	0	0	0	0	0	0	0	0	0	0	0	0	0	0	0	0	0	0	0	0	0	0	0	0	0	0	0	0	0	0	0	0	0	0	0	0	0	0	0	0	0	0	0	0	0	0
ENSDARG00000000529	0	0	0	0	0	0	0	0	0	0	0	0	0	0	0	0	0	0	0	0	0	0	0	0	0	0	0	0	0	0	0	0	0	0	0	0	0	0	0	0	0	0	0	0	0	0	0	0	0
ENSDARG00000000540	3.00109917	0	0	0	0	0	0	0	0	0	0	0	0	0	0	0	0	1.00012209	0	0	0	0	0	0	0	0	0	0	0	0	0	0	0	0	0	0	0	0	0	0	0	0	0	0	0	0	0	0	0
ENSDARG00000000542	0	0	0	0	0	0	0	0	0	0	0	0	0	0	0	0	0	2.00048844	0	0	0	0	1.00012209	0	0	0	0	0	0	0	0	0	0	0	0	0	0	0	0	0	0	0	0	0	0	0	0	0	0
ENSDARG00000000551	0	0	0	0	0	0	0	0	0	0	0	0	0	0	0	0	0	0	0	0	0	0	0	0	0	0	0	0	0	0	0	0	0	0	0	0	0	0	0	0	0	0	0	0	0	0	1.00012209	0	0
ENSDARG00000000563	1.00012209	7.005988269	3.00109917	4.001954397	2.00048844	8.007822687	2.00048844	3.00109917	0	754.3961561	2.00048844	1.00012209	6.004398828	2.00048844	1.00012209	2.00048844	1.00012209	1.00012209	4.001954397	0	0	67.55402354	1.00012209	0	76.713923	0	1.00012209	0	0	113.5597487	1.00012209	1.00012209	0	2.00048844	1.00012209	6.004398828	1.00012209	0	0	1.00012209	0	76.713923	0	30.11040269	0	1.00012209	12.01761253	0	0
ENSDARG00000000567	0	0	0	0	0	0	0	0	1.00012209	0	0	0	0	0	0	0	0	0	0	0	0	0	0	0	0	0	0	0	0	0	0	0	0	0	0	0	0	0	0	0	0	0	0	0	0	0	0	0	0
ENSDARG00000000568	0	0	0	0	0	0	0	1.00012209	0	10.01222694	0	0	0	0	0	0	0	0	0	0	0	0	1.00012209	0	1.00012209	0	0	0	0	0	0	1.00012209	0	0	0	0	2.00048844	0	0	0	0	0	0	0	0	0	3.00109917	0	0
ENSDARG00000000588	0	0	0	0	0	0	0	3.00109917	1.00012209	1.00012209	0	0	0	0	2.00048844	0	0	0	1.00012209	0	0	0	9.009902203	0	0	0	0	0	0	0	4.001954397	3.00109917	1.00012209	0	0	1.00012209	0	0	0	0	0	0	0	0	0	0	5.003054244	0	0
ENSDARG00000000631	0	0	0	0	0	0	0	2.00048844	0	1.00012209	0	1.00012209	0	0	0	0	0	0	0	0	0	0	0	0	0	0	0	0	0	0	0	1.00012209	0	0	1.00012209	0	0	0	0	0	0	0	0	0	0	0	0	0	0
ENSDARG00000000651	0	0	0	0	0	0	0	0	0	0	0	0	0	0	0	0	0	0	0	0	0	0	0	0	0	0	0	0	0	0	0	0	0	0	0	0	0	0	0	0	0	0	0	0	0	0	0	0	0
ENSDARG00000000656	0	0	0	0	0	1.00012209	0	0	0	2.00048844	0	0	0	0	0	0	0	4.001954397	0	0	0	0	0	0	0	0	0	0	0	0	0	0	0	0	0	0	1.00012209	0	0	0	0	0	0	0	0	0	0	0	0
ENSDARG00000000666	0	0	0	0	0	0	1.00012209	1.00012209	0	1.00012209	0	0	0	0	0	0	0	0	0	0	0	0	3.00109917	0	0	0	0	0	0	0	1.00012209	0	0	0	1.00012209	0	1.00012209	0	0	0	0	0	0	0	0	0	4.001954397	0	0
ENSDARG00000000690	0	0	0	0	0	0	0	1.00012209	0	0	0	0	0	0	0	0	0	5.003054244	0	0	0	0	0	0	0	0	0	0	0	0	1.00012209	0	0	0	0	0	0	0	0	0	0	0	0	0	0	0	1.00012209	0	0
ENSDARG00000000729	1.00012209	0	0	0	0	0	0	0	0	0	0	1.00012209	0	0	0	0	0	0	2.00048844	0	0	0	0	0	0	0	0	0	0	0	1.00012209	1.00012209	0	0	0	0	0	0	0	0	0	0	0	0	0	0	0	0	0
ENSDARG00000000730	0	0	0	0	0	0	0	0	0	0	0	0	0	0	0	0	0	0	0	0	0	0	0	0	0	0	0	0	0	0	0	0	0	0	0	0	0	0	0	1.00012209	0	1.00012209	0	0	0	0	0	0	0
ENSDARG00000000760	0	0	0	0	0	0	0	0	0	0	0	0	0	0	0	0	0	0	0	0	0	0	0	0	0	0	0	0	0	0	0	0	0	0	0	0	0	0	0	0	0	0	0	0	0	0	2.00048844	0	0
ENSDARG00000000767	4.001954397	0	0	0	0	0	0	1.00012209	0	0	0	0	0	0	0	0	0	0	0	0	0	0	0	0	0	0	0	0	0	0	0	0	0	0	0	1.00012209	0	0	0	0	0	0	0	0	0	0	0	0	0
ENSDARG00000000779	1.00012209	0	0	0	0	0	0	2.00048844	0	0	0	0	0	1.00012209	0	0	0	2.00048844	3.00109917	0	0	0	1.00012209	0	0	0	0	0	0	3.00109917	0	0	0	0	0	0	0	0	0	0	0	0	0	0	0	0	1.00012209	0	0
ENSDARG00000000796	5.003054244	2.00048844	0	0	0	0	0	2.00048844	0	45.24901792	0	2.00048844	0	0	1.00012209	2.00048844	0	2.00048844	16.03133162	0	0	1.00012209	25.07660581	0	1.00012209	0	0	0	0	0	32.12565488	1.00012209	6.004398828	1.00012209	4.001954397	0	0	0	0	6.004398828	0	0	0	0	0	0	7.005988269	0	0
ENSDARG00000000830	0	0	0	0	0	0	0	0	0	0	0	0	0	0	0	0	0	0	0	0	0	0	0	0	0	0	0	0	0	0	0	0	0	0	0	0	0	0	0	0	0	0	0	0	0	0	0	0	0
ENSDARG00000000837	0	0	0	0	0	0	0	0	0	0	0	0	0	0	0	0	0	0	0	0	0	0	0	0	0	0	0	0	0	0	0	0	1.00012209	0	0	0	0	0	0	0	0	0	0	0	0	0	0	0	0
ENSDARG00000000853	1.00012209	0	0	0	0	0	0	0	0	0	0	0	0	0	0	0	0	1.00012209	0	0	0	0	0	0	0	0	0	0	0	0	0	0	0	0	0	0	0	0	0	0	0	0	0	0	0	0	0	0	0
ENSDARG00000000857	0	0	0	0	0	0	0	0	0	0	0	0	0	0	0	0	0	0	0	0	0	0	1.00012209	0	0	0	0	0	0	0	0	2.00048844	0	0	0	0	1.00012209	0	0	3.00109917	0	0	0	0	0	0	0	0	0
ENSDARG00000000861	0	0	0	0	0	0	0	0	0	0	0	0	0	0	0	0	0	0	0	0	0	0	0	0	0	0	0	0	0	0	0	0	1.00012209	0	0	0	0	0	0	0	0	0	0	0	0	0	1.00012209	0	0
ENSDARG00000000906	4.001954397	1.00012209	0	0	0	0	0	2.00048844	0	0	0	0	0	0	0	0	0	0	0	0	0	0	0	0	0	0	0	0	0	0	0	0	0	0	0	0	0	0	0	0	0	0	0	0	0	0	0	0	0
ENSDARG00000000935	0	0	0	0	0	0	0	0	0	0	0	0	0	0	0	0	0	0	0	0	0	0	0	0	0	0	0	0	0	0	0	0	0	0	2.00048844	0	0	0	0	0	0	0	0	0	0	0	0	0	0
ENSDARG00000000943	0	0	0	0	0	0	0	0	0	0	0	0	0	0	0	0	0	0	0	0	0	0	0	0	0	0	0	0	0	0	0	0	0	0	0	0	0	0	0	0	0	0	0	0	0	0	0	0	0
ENSDARG00000000966	0	1.00012209	0	0	0	0	0	2.00048844	0	0	0	0	0	0	0	0	0	2.00048844	1.00012209	0	0	0	0	0	1.00012209	0	0	0	0	0	1.00012209	0	1.00012209	0	0	0	1.00012209	0	0	0	0	0	0	0	0	0	2.00048844	0	0
ENSDARG00000000972	1.00012209	0	0	0	0	0	0	0	0	0	0	0	0	0	0	0	0	6.004398828	0	0	0	0	0	0	0	0	0	0	0	0	0	0	0	0	0	0	0	0	0	0	0	0	0	0	0	0	1.00012209	0	0
ENSDARG00000001014	0	0	1.00012209	0	0	0	0	0	0	2.00048844	0	0	0	0	0	0	0	2.00048844	0	0	0	0	3.00109917	0	0	0	0	0	0	0	1.00012209	0	0	0	0	0	2.00048844	0	0	0	0	2.00048844	0	0	0	0	2.00048844	0	0
ENSDARG00000001015	0	0	0	0	0	0	0	0	0	0	0	0	0	0	0	0	0	0	0	0	0	0	0	0	0	0	0	0	0	0	0	0	1.00012209	0	0	0	0	0	0	0	0	0	0	0	0	0	0	0	0
ENSDARG00000001057	0	0	0	0	0	0	0	0	0	1.00012209	0	0	0	0	0	0	0	1.00012209	0	0	0	0	0	0	0	0	0	0	0	0	0	0	0	0	0	0	0	0	0	0	0	0	0	0	0	0	2.00048844	0	0
ENSDARG00000001127	0	0	0	0	0	0	0	0	0	0	0	0	0	0	0	0	0	0	0	0	0	0	0	0	0	0	0	0	0	0	0	0	0	0	0	0	0	0	0	0	0	0	0	0	0	0	0	0	0
ENSDARG00000001129	0	0	0	0	0	0	0	0	0	0	0	0	0	0	0	0	0	0	0	0	0	0	2.00048844	0	0	0	0	0	0	0	1.00012209	1.00012209	0	1.00012209	0	0	0	0	0	0	0	0	0	0	0	0	1.00012209	0	0
ENSDARG00000001162	0	0	0	0	0	0	0	2.00048844	0	3.00109917	0	0	0	0	0	0	0	1.00012209	0	0	0	0	3.00109917	0	0	0	0	0	0	0	1.00012209	1.00012209	0	0	1.00012209	0	5.003054244	0	0	0	0	0	0	0	0	0	0	0	0
ENSDARG00000001169	0	0	0	0	0	0	0	0	0	0	0	0	0	0	0	0	0	1.00012209	0	0	0	0	0	0	0	0	0	0	0	0	0	0	0	0	0	0	0	0	0	0	0	0	0	0	0	0	0	0	0
ENSDARG00000001210	0	0	0	0	0	0	0	0	0	0	0	0	0	0	0	0	0	0	0	0	0	0	0	0	0	0	0	0	0	0	0	0	0	0	0	0	0	0	0	0	0	0	0	0	0	0	0	0	0
ENSDARG00000001220	0	0	0	0	0	0	0	0	0	1.00012209	0	1.00012209	0	0	0	0	0	4.001954397	0	0	0	0	4.001954397	0	1.00012209	0	0	0	0	0	0	0	0	0	0	0	0	0	0	1.00012209	0	0	0	0	0	0	6.004398828	0	0
ENSDARG00000001234	0	0	0	0	0	0	1.00012209	0	0	1.00012209	0	1.00012209	0	0	0	0	0	0	0	0	0	0	3.00109917	0	0	0	0	0	0	0	9.009902203	2.00048844	0	0	0	0	3.00109917	0	0	0	0	0	0	0	0	0	15.02753306	0	0
ENSDARG00000001241	1.00012209	0	0	0	0	0	0	1.00012209	0	2.00048844	0	0	0	0	0	0	0	2.00048844	0	0	0	0	0	0	0	0	0	0	0	0	1.00012209	0	0	0	0	0	0	0	0	3.00109917	0	0	0	0	0	0	4.001954397	0	0
ENSDARG00000001244	0	0	0	0	0	0	1.00012209	1.00012209	0	3.00109917	0	2.00048844	0	1.00012209	3.00109917	0	0	11.01479701	1.00012209	0	0	0	7.005988269	0	1.00012209	0	0	0	0	0	1.00012209	2.00048844	2.00048844	0	0	0	0	0	0	3.00109917	0	0	0	0	0	0	5.003054244	1.00012209	0
ENSDARG00000001249	0	0	0	0	0	0	0	0	0	0	0	0	0	0	0	0	0	0	0	0	0	0	0	0	0	0	0	0	0	0	0	0	0	0	0	0	0	0	0	0	0	0	0	0	0	0	0	0	0
ENSDARG00000001285	0	0	0	0	0	0	0	0	0	0	0	1.00012209	0	0	0	0	0	0	0	0	0	0	0	0	0	0	0	0	0	0	2.00048844	0	0	0	0	0	1.00012209	0	0	1.00012209	0	0	0	0	0	0	1.00012209	0	0
ENSDARG00000001303	2.00048844	0	0	0	0	0	0	1.00012209	0	1.00012209	0	0	0	0	0	0	0	15.02753306	0	0	0	0	1.00012209	0	0	0	0	0	0	0	0	2.00048844	1.00012209	0	4.001954397	0	1.00012209	0	0	0	0	0	0	0	0	0	0	0	0
ENSDARG00000001354	0	0	0	0	0	0	0	0	0	0	0	0	0	0	0	0	0	0	0	0	0	0	0	0	0	0	0	0	0	0	0	0	0	0	0	0	0	0	0	0	0	0	0	0	0	0	0	0	0
ENSDARG00000001414	0	0	0	0	0	0	0	0	0	0	0	0	0	0	0	0	0	0	0	0	0	0	0	0	0	0	0	0	0	0	0	0	0	0	0	0	0	0	0	0	0	0	0	0	0	0	0	0	0
ENSDARG00000001431	0	0	0	0	0	0	0	0	0	0	0	0	0	0	0	0	0	1.00012209	0	0	0	0	0	0	0	0	0	0	0	0	0	0	0	0	0	0	0	0	0	0	0	0	0	0	0	0	0	0	0
ENSDARG00000001437	0	0	0	0	0	0	0	0	0	2.00048844	0	0	0	0	0	0	0	0	0	0	0	0	0	0	1.00012209	0	0	0	0	0	0	0	0	0	0	0	0	0	0	0	0	0	0	0	0	0	1.00012209	0	0
ENSDARG00000001442	0	0	0	0	0	0	0	0	0	0	0	0	0	0	0	0	0	0	0	0	0	0	0	0	0	0	0	0	0	0	0	0	0	0	0	0	0	0	0	0	0	0	0	0	0	0	0	0	0
ENSDARG00000001447	0	1.00012209	0	0	0	0	0	0	0	0	0	0	0	0	0	0	0	0	0	0	0	0	1.00012209	0	0	0	0	0	0	0	0	0	0	0	0	0	0	0	0	0	0	0	0	0	0	0	0	0	0
ENSDARG00000001452	2.00048844	0	1.00012209	0	0	0	0	17.03537624	0	0	0	0	0	0	0	0	0	18.03966704	0	0	0	0	0	0	0	0	0	0	0	0	0	0	0	0	0	0	0	0	0	0	0	0	0	0	0	0	0	0	0
ENSDARG00000001463	0	0	0	0	0	0	0	0	0	2.00048844	0	0	0	0	0	0	0	0	0	0	0	0	0	0	0	0	0	0	0	0	0	0	0	0	0	0	0	0	0	0	0	0	0	0	0	0	0	0	0
ENSDARG00000001470	0	0	0	0	0	0	0	1.00012209	0	0	0	0	0	0	0	0	0	0	0	0	0	0	0	0	0	0	0	0	0	0	0	0	0	0	0	0	0	0	0	0	0	0	0	0	0	0	0	0	0
ENSDARG00000001498	0	0	0	0	0	0	0	0	0	0	0	0	0	0	0	0	0	0	0	0	0	0	0	0	0	0	0	0	0	0	0	0	0	0	0	0	0	0	0	0	0	0	0	0	0	0	0	0	0
ENSDARG00000001549	0	0	0	0	0	0	0	0	0	0	0	0	0	0	0	0	0	1.00012209	1.00012209	0	0	0	1.00012209	0	0	0	0	0	0	0	0	1.00012209	0	0	0	0	1.00012209	0	0	0	0	0	0	0	0	0	4.001954397	0	0
ENSDARG00000001557	0	0	0	0	0	0	0	0	0	0	0	0	0	0	0	0	0	0	0	0	0	0	0	0	0	0	0	0	0	0	0	0	0	0	0	0	0	0	0	0	0	0	0	0	0	0	3.00109917	0	0
ENSDARG00000001558	0	0	0	0	0	0	0	0	0	0	0	0	0	0	0	0	0	0	0	0	0	0	0	0	0	0	0	0	0	0	0	0	0	0	0	0	0	0	0	0	0	0	0	0	0	0	0	0	0
ENSDARG00000001559	0	0	0	0	0	0	0	0	0	0	0	0	0	0	0	0	0	0	0	0	0	0	0	0	0	0	0	0	0	0	0	0	0	0	0	0	0	0	0	0	0	0	0	0	0	0	0	0	0
ENSDARG00000001578	0	0	0	0	0	0	0	0	0	11.01479701	0	0	0	0	0	0	0	1.00012209	0	0	0	0	0	0	0	1.00012209	0	0	0	0	0	0	0	2.00048844	0	0	0	0	0	0	0	0	0	0	0	0	1.00012209	0	0
ENSDARG00000001621	0	0	1.00012209	0	0	0	0	0	0	0	0	0	0	0	0	0	0	0	1.00012209	0	0	0	0	0	0	0	0	0	0	0	0	0	0	0	0	0	0	0	0	0	0	0	0	0	0	0	0	0	0
ENSDARG00000001634	0	0	0	0	0	0	0	0	0	0	0	0	0	0	0	0	0	4.001954397	0	0	0	1.00012209	0	0	0	0	0	0	0	0	0	0	0	0	0	0	0	0	0	4.001954397	0	0	0	0	0	0	0	0	0
ENSDARG00000001637	0	0	0	0	0	0	0	1.00012209	0	0	0	0	0	0	0	0	0	0	0	0	0	0	0	0	0	0	0	0	0	0	0	0	0	0	0	0	0	0	0	0	0	1.00012209	0	0	0	0	1.00012209	0	0
ENSDARG00000001656	2.00048844	0	0	0	0	0	0	2.00048844	0	3.00109917	0	1.00012209	0	0	0	0	0	1.00012209	0	0	0	0	0	0	0	0	0	0	0	0	0	0	0	0	0	0	1.00012209	0	0	0	0	0	0	0	0	0	0	0	0
ENSDARG00000001676	0	0	0	0	0	0	0	0	0	1.00012209	0	0	0	0	0	0	0	1.00012209	0	0	0	0	1.00012209	0	0	0	0	0	0	0	0	0	0	0	0	0	0	0	0	0	0	0	0	0	0	0	1.00012209	0	0
ENSDARG00000001712	0	0	0	0	0	0	0	0	0	0	0	0	0	0	0	0	0	0	0	0	0	0	0	0	0	0	0	0	0	0	0	0	0	0	0	0	0	0	0	0	0	0	0	0	0	0	0	0	0
ENSDARG00000001729	0	1.00012209	0	0	0	0	0	0	0	4.001954397	0	0	0	0	0	0	0	4.001954397	0	0	0	1.00012209	1.00012209	0	3.00109917	0	0	0	0	0	1.00012209	1.00012209	0	0	1.00012209	0	0	0	0	0	0	0	0	0	0	0	3.00109917	0	0
ENSDARG00000001733	0	0	0	0	0	0	0	0	0	0	0	0	0	0	0	0	0	14.02398044	0	0	0	0	0	0	0	0	0	0	0	0	0	0	0	0	0	0	0	0	0	1.00012209	0	0	0	0	0	0	0	0	0
ENSDARG00000001734	0	0	0	0	0	0	0	0	0	1.00012209	0	1.00012209	0	0	0	0	0	0	0	0	0	0	0	0	0	0	0	0	0	0	0	0	0	0	2.00048844	0	0	0	0	0	0	0	0	0	0	1.00012209	0	0	0
ENSDARG00000001754	0	0	0	0	0	0	0	0	0	0	0	0	0	0	0	0	0	2.00048844	0	0	0	0	0	0	0	0	0	0	0	0	0	0	0	0	0	0	0	0	0	1.00012209	0	0	0	0	0	0	0	0	0
ENSDARG00000001760	0	0	0	0	0	0	0	0	0	0	0	0	0	0	0	0	0	1.00012209	0	0	0	0	0	0	0	0	0	0	0	0	0	0	0	0	0	0	0	0	0	0	0	0	0	0	0	0	0	0	0
ENSDARG00000001769	0	0	0	0	0	0	0	0	0	2.00048844	0	0	0	0	1.00012209	0	0	0	1.00012209	0	0	0	1.00012209	0	0	0	0	0	0	0	4.001954397	0	0	0	0	0	0	0	0	1.00012209	0	0	0	0	0	0	7.005988269	0	0
ENSDARG00000001776	0	0	0	0	0	0	0	0	0	0	0	0	0	0	0	0	0	1.00012209	0	0	0	0	0	0	0	0	0	0	0	0	0	0	0	0	0	0	0	0	0	0	0	0	0	0	0	0	3.00109917	0	0
ENSDARG00000001777	0	0	0	0	0	0	0	0	0	0	0	0	0	0	0	0	0	0	0	0	0	0	0	0	0	0	0	0	0	0	0	0	0	0	0	0	0	0	0	0	0	0	0	0	0	0	0	0	0
ENSDARG00000001781	0	0	0	0	0	0	0	0	0	0	0	0	0	0	0	0	0	0	1.00012209	0	0	0	1.00012209	0	0	0	0	0	0	0	0	1.00012209	1.00012209	0	1.00012209	0	1.00012209	0	0	1.00012209	0	0	0	0	0	0	0	0	0
ENSDARG00000001782	0	0	0	0	0	0	0	0	0	0	0	0	0	0	0	0	0	0	0	0	0	0	0	0	0	0	0	0	0	0	0	0	0	0	0	0	0	0	0	0	0	0	0	0	0	0	0	0	0
ENSDARG00000001785	0	0	0	0	0	0	0	0	0	1.00012209	0	0	0	0	0	0	0	0	0	0	0	0	0	0	0	0	0	0	0	0	0	0	0	0	0	0	0	0	0	0	0	0	0	0	0	0	0	0	0
ENSDARG00000001788	0	0	0	0	1.00012209	1.00012209	0	2.00048844	0	82.83192264	0	1.00012209	1.00012209	0	1.00012209	0	0	14.02398044	1.00012209	0	0	0	3.00109917	0	10.01222694	1.00012209	0	0	0	1.00012209	1.00012209	1.00012209	0	0	2.00048844	1.00012209	2.00048844	0	0	2.00048844	0	1.00012209	0	0	0	1.00012209	8.007822687	0	0
ENSDARG00000001803	0	0	0	0	0	0	0	0	0	6.004398828	0	0	0	0	0	0	0	0	0	0	0	0	0	0	2.00048844	0	0	0	0	3.00109917	0	1.00012209	0	0	0	0	0	0	0	0	0	3.00109917	0	0	0	0	0	0	0
ENSDARG00000001804	0	0	0	0	0	0	0	0	0	0	0	0	0	0	0	0	0	0	0	0	0	0	0	0	0	0	0	0	0	0	0	0	0	0	0	0	0	0	0	0	0	0	0	0	0	0	0	0	0
ENSDARG00000001807	0	0	0	0	0	0	0	1.00012209	0	0	0	0	0	0	0	0	0	0	1.00012209	0	0	0	0	0	0	0	0	1.00012209	0	0	0	0	0	0	0	0	0	0	0	0	0	0	0	0	0	0	0	0	0
ENSDARG00000001829	0	0	0	0	0	0	0	0	0	0	0	0	0	0	0	0	0	0	0	0	0	0	1.00012209	0	0	0	0	0	0	0	0	0	0	0	0	0	0	0	0	0	0	0	0	0	0	0	0	0	0
ENSDARG00000001832	22.05929444	1.00012209	0	0	0	0	2.00048844	6.004398828	0	0	0	1.00012209	0	0	1.00012209	0	0	3.00109917	2.00048844	0	0	0	5.003054244	0	0	0	0	0	0	0	2.00048844	9.009902203	1.00012209	0	2.00048844	0	0	0	0	0	0	0	1.00012209	0	0	0	0	0	0
ENSDARG00000001835	1.00012209	0	0	0	0	0	0	0	0	0	0	0	0	0	0	0	0	0	0	0	0	0	2.00048844	0	0	0	0	0	0	0	1.00012209	0	0	0	0	0	0	0	0	0	0	0	0	0	0	0	0	0	0
ENSDARG00000001857	0	0	0	0	0	0	0	0	0	0	0	0	0	0	0	0	0	0	0	0	0	0	1.00012209	0	0	0	0	0	0	0	0	0	0	0	0	0	0	0	0	0	0	0	0	0	0	0	1.00012209	0	0
ENSDARG00000001870	0	1.00012209	0	0	0	0	0	0	0	0	0	0	0	0	0	0	0	1.00012209	1.00012209	0	0	0	0	0	0	0	0	0	0	0	0	0	0	0	1.00012209	0	0	0	0	0	0	0	0	0	0	0	1.00012209	0	0
ENSDARG00000001873	0	0	0	0	0	0	0	0	0	0	0	0	0	0	0	0	0	0	0	0	0	0	0	0	0	0	0	0	0	0	0	0	0	0	0	0	0	0	0	0	0	0	0	0	0	0	0	0	0
ENSDARG00000001879	0	0	0	0	0	1.00012209	0	0	0	1.00012209	1.00012209	0	0	0	0	0	0	0	0	0	0	0	0	0	0	0	0	0	0	0	0	0	0	0	0	0	0	0	0	0	0	0	0	0	0	0	0	0	0
ENSDARG00000001880	0	0	1.00012209	0	0	0	0	0	0	0	0	0	0	0	0	0	0	0	0	0	0	0	0	0	0	0	0	0	0	0	0	0	0	0	1.00012209	0	0	0	0	0	0	0	0	0	0	0	0	0	0
ENSDARG00000001881	0	0	0	0	0	0	0	0	0	0	0	0	0	0	0	0	0	0	0	0	0	0	0	0	0	0	0	0	0	0	0	0	0	0	0	0	0	0	0	0	0	0	0	0	0	0	0	0	0
ENSDARG00000001882	0	0	0	0	0	0	0	0	0	0	0	0	0	0	0	0	0	0	0	0	0	0	0	0	0	0	0	0	0	0	0	0	0	0	0	0	0	0	0	0	0	0	0	0	0	0	0	0	0
ENSDARG00000001888	0	0	0	0	0	0	0	0	0	5.003054244	0	0	0	0	0	0	0	0	0	0	0	0	0	0	0	0	0	0	0	0	0	0	0	0	0	0	0	0	0	0	0	0	0	0	0	0	3.00109917	0	0
ENSDARG00000001889	0	0	0	0	0	0	0	0	0	0	0	0	0	0	0	0	0	19.04420413	0	0	0	0	0	0	0	0	0	0	0	0	0	0	0	0	0	0	0	0	0	3.00109917	0	0	0	0	0	0	0	0	0
ENSDARG00000001890	0	0	0	0	0	0	1.00012209	1.00012209	0	0	0	2.00048844	0	0	0	0	0	2.00048844	0	0	0	0	2.00048844	0	0	0	0	0	0	0	1.00012209	0	2.00048844	0	0	0	1.00012209	0	0	2.00048844	0	0	0	0	0	0	7.005988269	0	0
ENSDARG00000001891	0	0	0	0	0	0	0	0	0	0	0	0	0	0	0	0	0	0	0	0	0	0	0	0	0	0	0	0	0	0	0	0	0	0	0	0	0	0	0	0	0	0	0	0	0	0	0	0	0
ENSDARG00000001897	0	0	0	0	0	0	1.00012209	0	0	0	0	0	0	0	0	0	0	3.00109917	0	0	0	0	2.00048844	0	0	0	0	0	0	0	0	0	1.00012209	0	1.00012209	0	0	0	0	0	0	0	0	0	0	0	2.00048844	0	0
ENSDARG00000001898	0	0	0	0	0	0	0	0	0	1.00012209	0	0	0	0	0	0	0	0	0	0	0	0	1.00012209	0	0	0	0	0	0	0	0	0	0	0	0	0	1.00012209	0	0	0	0	0	0	0	0	0	1.00012209	0	0
ENSDARG00000001910	1.00012209	0	0	0	0	0	0	0	0	3.00109917	0	0	0	0	0	0	0	0	0	0	0	0	1.00012209	0	0	0	0	0	0	0	0	0	0	0	2.00048844	0	0	0	0	0	0	0	0	0	0	0	0	0	0
ENSDARG00000001929	0	0	0	0	0	0	0	0	1.00012209	9.009902203	0	0	0	0	0	0	0	1.00012209	0	0	0	1.00012209	1.00012209	0	0	0	0	0	0	0	0	1.00012209	0	1.00012209	1.00012209	0	0	0	0	0	1.00012209	0	0	0	0	0	0	0	0
ENSDARG00000001930	0	0	0	0	0	0	0	1.00012209	0	0	0	0	0	0	0	0	0	0	0	0	0	0	0	0	0	0	0	0	0	0	0	0	0	0	0	0	0	0	0	0	0	0	0	0	0	0	0	0	0
ENSDARG00000001933	0	1.00012209	0	0	0	0	0	0	0	0	0	0	0	0	0	0	0	0	0	0	0	0	0	0	0	0	0	0	0	0	0	0	0	0	2.00048844	0	0	0	0	0	0	0	0	0	0	0	0	0	0
ENSDARG00000001939	0	0	0	0	0	0	0	0	0	0	0	0	0	0	0	0	0	0	0	0	0	0	0	0	0	0	0	0	0	0	0	0	0	0	0	0	0	0	0	0	0	0	0	0	0	0	0	0	0
ENSDARG00000001940	0	0	0	0	0	0	0	0	0	4.001954397	0	0	0	0	1.00012209	0	0	1.00012209	2.00048844	0	0	0	1.00012209	0	0	0	0	0	0	0	0	0	1.00012209	0	1.00012209	0	3.00109917	0	0	1.00012209	0	0	0	0	0	0	0	0	0
ENSDARG00000001950	2.00048844	2.00048844	2.00048844	1.00012209	0	0	0	2.00048844	0	130.0426683	0	0	0	0	3.00109917	2.00048844	0	1.00012209	5.003054244	0	0	1.00012209	1.00012209	0	7.005988269	0	0	0	0	0	1.00012209	3.00109917	1.00012209	5.003054244	4.001954397	1.00012209	2.00048844	0	0	2.00048844	0	1.00012209	1.00012209	2.00048844	0	1.00012209	4.001954397	0	0
ENSDARG00000001953	23.06481795	0	1.00012209	0	0	1.00012209	2.00048844	5.003054244	0	0	0	1.00012209	0	0	1.00012209	0	0	0	1.00012209	0	0	0	31.11790484	1.00012209	0	0	0	0	0	0	0	2.00048844	0	0	0	0	0	0	0	0	0	0	0	0	0	0	2.00048844	0	0
ENSDARG00000001968	0	0	0	0	0	0	0	0	0	0	0	0	0	0	0	0	0	2.00048844	0	0	0	0	0	0	0	0	0	0	0	0	0	0	0	0	0	0	0	0	0	0	0	0	0	0	0	0	0	0	0
ENSDARG00000001969	0	0	0	0	0	0	0	0	0	0	0	0	0	0	0	0	0	0	0	0	0	0	0	0	0	0	0	0	0	0	0	0	0	0	0	0	0	0	0	0	0	0	0	0	0	0	0	0	0
ENSDARG00000001972	2.00048844	0	0	0	0	0	0	0	0	0	0	0	0	0	0	0	0	0	0	0	0	0	0	0	0	0	0	0	0	0	0	0	0	0	0	0	0	0	0	0	0	0	0	0	0	0	0	0	0
ENSDARG00000001975	0	0	0	0	0	0	0	0	0	30.11040269	0	1.00012209	0	0	1.00012209	0	0	0	0	0	0	0	1.00012209	0	6.004398828	0	0	0	0	5.003054244	0	0	0	2.00048844	0	2.00048844	0	1.00012209	0	14.02398044	0	1.00012209	0	3.00109917	0	0	0	0	0
ENSDARG00000001993	0	0	0	0	0	0	0	0	0	0	0	0	0	0	0	0	0	0	0	0	0	0	0	0	0	0	0	0	0	0	0	0	0	0	0	0	0	0	0	0	0	0	0	0	0	0	0	0	0
ENSDARG00000001994	0	0	0	0	0	0	0	0	0	0	0	0	0	0	0	0	0	0	0	0	0	0	0	0	0	0	0	0	0	0	0	0	0	0	0	0	0	0	0	0	0	0	0	0	0	0	0	0	0
ENSDARG00000002002	0	0	0	0	0	0	0	0	0	0	0	0	0	0	0	0	0	5.003054244	0	0	0	0	0	0	0	0	0	0	0	0	0	0	0	0	0	0	0	0	0	0	0	0	0	0	0	0	4.001954397	0	0
ENSDARG00000002006	0	0	0	0	0	0	0	0	0	1.00012209	0	0	0	0	0	0	0	1.00012209	0	0	0	0	0	0	1.00012209	0	0	0	0	0	0	0	2.00048844	0	1.00012209	0	0	0	0	0	0	0	0	0	0	0	0	0	0
ENSDARG00000002013	0	2.00048844	1.00012209	0	0	0	1.00012209	0	0	2.00048844	0	11.01479701	1.00012209	0	5.003054244	0	0	1.00012209	10.01222694	0	0	0	20.04898766	0	0	1.00012209	0	0	0	0	15.02753306	15.02753306	4.001954397	0	7.005988269	0	8.007822687	0	0	0	0	0	0	0	0	0	18.03966704	1.00012209	0
ENSDARG00000002016	0	0	0	0	0	0	0	0	0	0	0	0	0	0	0	0	0	0	0	0	0	0	0	0	0	0	0	0	0	0	0	0	0	0	0	0	1.00012209	0	0	0	0	0	0	0	0	0	0	0	0
ENSDARG00000002020	0	0	0	0	0	0	0	0	0	0	0	0	0	0	0	0	0	2.00048844	0	0	0	0	1.00012209	0	0	0	0	0	0	0	0	0	0	0	0	0	0	0	1.00012209	0	0	0	0	0	0	0	0	0	0
ENSDARG00000002021	0	0	0	0	0	0	0	0	0	5.003054244	0	0	1.00012209	0	0	1.00012209	0	10.01222694	2.00048844	0	0	0	1.00012209	0	0	0	0	0	0	0	0	0	0	1.00012209	1.00012209	0	0	0	0	0	0	0	0	0	0	0	0	0	0
ENSDARG00000002031	0	0	0	0	0	0	0	0	0	0	0	0	0	0	1.00012209	0	0	1.00012209	0	0	0	0	0	0	0	0	0	0	0	0	0	0	0	0	0	0	0	0	0	0	0	0	0	0	0	0	0	0	0
ENSDARG00000002037	0	0	0	0	0	0	0	0	0	0	0	0	0	0	0	0	0	0	0	0	0	0	0	0	0	0	0	0	0	0	0	0	0	0	0	0	0	0	0	0	0	0	0	0	0	0	0	0	0
ENSDARG00000002046	0	0	0	0	0	0	0	0	0	0	0	0	0	0	0	0	0	0	0	0	0	0	0	0	0	0	0	0	0	0	0	0	0	0	0	0	0	0	0	0	0	0	0	0	0	0	0	0	0
ENSDARG00000002060	0	0	0	0	0	0	0	0	0	0	0	0	0	0	0	0	0	1.00012209	0	0	0	0	0	0	0	0	0	0	0	0	0	0	0	0	0	0	0	0	0	0	0	0	0	0	0	0	0	0	0
ENSDARG00000002071	0	0	0	0	0	0	0	0	0	2.00048844	0	0	1.00012209	0	0	0	0	0	0	0	0	0	1.00012209	0	0	0	0	0	0	0	0	0	0	0	0	0	0	0	0	0	0	0	0	0	0	0	0	0	0
ENSDARG00000002077	0	0	0	0	0	0	0	0	0	0	0	0	0	0	0	0	0	0	0	0	0	0	0	0	0	0	0	0	0	0	0	0	0	0	0	0	0	0	0	0	0	0	0	0	0	0	0	0	0
ENSDARG00000002082	0	0	0	0	0	0	0	1.00012209	0	4.001954397	0	0	0	0	0	0	0	5.003054244	0	0	0	0	2.00048844	0	0	0	0	0	0	0	0	0	0	0	0	0	0	0	0	0	0	0	0	0	0	0	2.00048844	0	0
ENSDARG00000002084	0	0	0	0	0	0	0	0	0	4.001954397	0	0	0	0	0	0	0	3.00109917	0	0	0	0	0	0	1.00012209	0	0	0	0	1.00012209	0	0	0	0	0	0	0	0	0	2.00048844	0	4.001954397	0	0	1.00012209	0	0	0	0
ENSDARG00000002097	0	0	0	0	0	0	0	0	0	0	0	0	0	0	0	0	0	0	0	0	0	0	0	0	0	0	0	0	0	0	0	0	0	0	0	0	0	0	0	0	0	0	0	0	0	0	0	0	0
ENSDARG00000002127	0	0	0	0	0	0	0	3.00109917	0	1.00012209	0	0	0	0	0	0	0	0	0	0	0	0	0	0	0	0	0	0	0	0	0	0	0	0	0	0	0	0	0	0	0	0	0	0	0	0	2.00048844	0	0
ENSDARG00000002128	1.00012209	0	0	0	0	0	0	0	0	0	0	0	0	0	1.00012209	0	0	0	0	0	0	0	0	0	0	0	0	0	0	0	0	1.00012209	0	0	0	0	0	0	0	0	0	0	0	0	0	0	1.00012209	0	0
ENSDARG00000002131	5.003054244	0	0	0	0	0	0	1.00012209	0	0	0	0	0	0	1.00012209	0	0	6.004398828	2.00048844	0	0	0	1.00012209	0	0	0	0	0	0	0	0	2.00048844	1.00012209	0	0	0	0	0	0	4.001954397	0	0	0	0	0	0	2.00048844	0	0
ENSDARG00000002148	0	0	0	0	0	0	0	0	0	0	0	0	0	0	0	0	0	0	0	0	0	0	0	0	0	0	0	0	0	0	1.00012209	0	0	0	0	0	3.00109917	0	0	1.00012209	0	0	0	0	0	0	0	0	0
ENSDARG00000002165	0	0	0	0	0	0	0	4.001954397	0	2.00048844	0	0	0	0	0	0	0	7.005988269	1.00012209	1.00012209	0	0	1.00012209	0	0	0	0	0	0	0	0	1.00012209	0	0	3.00109917	0	0	0	0	0	0	0	0	0	0	0	2.00048844	0	0
ENSDARG00000002167	0	0	0	0	0	0	0	0	0	1.00012209	0	0	0	0	0	0	0	0	0	0	0	0	0	0	1.00012209	0	0	0	0	0	0	0	0	0	0	0	0	0	0	0	0	0	0	0	0	0	0	0	0
ENSDARG00000002168	0	0	0	0	0	0	0	0	0	0	0	0	0	0	0	0	0	0	0	0	0	0	0	0	0	0	0	0	0	0	1.00012209	0	0	0	0	0	0	0	0	0	0	0	0	0	0	0	0	0	0
ENSDARG00000002172	0	0	0	0	0	0	0	0	0	0	0	0	0	0	0	0	0	0	3.00109917	0	0	0	0	0	0	0	0	0	0	0	0	1.00012209	0	0	1.00012209	0	0	0	0	1.00012209	0	0	0	0	0	0	0	0	0
ENSDARG00000002174	0	0	0	0	0	0	0	0	0	0	0	0	0	0	0	0	0	0	0	0	0	0	0	0	0	0	0	0	0	0	0	0	0	0	1.00012209	0	0	0	0	0	0	0	0	0	0	0	0	0	0
ENSDARG00000002184	0	0	0	0	0	0	0	0	0	0	0	0	0	0	0	0	0	1.00012209	0	0	0	0	0	0	0	0	0	0	0	0	0	0	0	0	0	0	0	0	0	0	0	0	0	0	0	0	0	0	0
ENSDARG00000002190	3.00109917	0	0	0	0	0	0	2.00048844	0	2.00048844	0	0	0	0	0	0	0	2.00048844	0	0	0	1.00012209	0	0	0	0	0	0	0	0	0	0	1.00012209	0	1.00012209	0	0	0	0	0	0	0	0	0	0	0	6.004398828	0	0
ENSDARG00000002192	0	0	0	0	0	0	0	0	0	0	0	0	0	0	0	0	0	1.00012209	0	0	0	0	0	0	0	0	0	0	0	0	0	0	0	0	0	0	0	0	0	0	0	0	0	0	0	0	0	0	0
ENSDARG00000002194	0	0	0	0	0	0	0	0	0	0	0	0	0	0	0	0	0	0	0	0	0	0	0	0	0	0	0	0	0	0	0	0	0	0	0	0	0	0	0	0	0	0	0	0	0	0	0	0	0
ENSDARG00000002196	0	0	0	0	0	0	0	1.00012209	0	1.00012209	0	1.00012209	0	0	0	0	0	2.00048844	0	0	0	0	0	0	0	0	0	0	0	0	0	0	0	0	0	0	0	0	0	0	0	0	0	0	0	0	2.00048844	0	0
ENSDARG00000002197	0	0	0	0	0	0	0	0	0	0	0	0	0	0	0	0	0	0	0	0	0	0	0	0	0	0	0	0	0	0	0	0	0	0	0	0	0	0	0	0	0	0	0	0	0	0	0	0	0
ENSDARG00000002204	1.00012209	3.00109917	1.00012209	1.00012209	2.00048844	1.00012209	0	0	2.00048844	67.55402354	1.00012209	0	8.007822687	0	0	0	0	4.001954397	0	0	0	14.02398044	1.00012209	0	20.04898766	1.00012209	0	0	0	1.00012209	1.00012209	0	0	15.02753306	1.00012209	1.00012209	1.00012209	0	0	0	0	1.00012209	2.00048844	3.00109917	0	0	3.00109917	0	0
ENSDARG00000002210	0	0	0	0	0	0	0	0	0	0	0	0	0	0	0	0	0	0	0	0	0	0	0	0	0	0	0	0	0	0	0	0	0	0	0	0	0	0	0	2.00048844	0	0	0	0	0	0	0	0	0
ENSDARG00000002213	0	0	0	0	0	0	0	0	0	0	0	0	0	0	0	0	0	1.00012209	0	0	0	0	0	0	0	0	0	0	0	0	0	1.00012209	0	0	0	0	0	0	0	0	0	0	0	0	0	0	0	0	0
ENSDARG00000002215	2.00048844	0	0	0	0	0	0	0	0	5.003054244	0	1.00012209	0	0	0	0	0	1.00012209	2.00048844	0	0	0	1.00012209	0	0	0	0	0	0	0	1.00012209	0	0	0	0	0	3.00109917	0	0	2.00048844	0	0	0	0	0	0	6.004398828	0	0
ENSDARG00000002216	0	0	0	0	0	0	0	0	0	0	0	0	0	0	0	0	0	2.00048844	0	0	0	0	0	0	0	0	0	0	0	0	0	0	0	0	0	0	0	0	0	0	0	0	0	0	0	0	0	0	0
ENSDARG00000002217	0	0	0	0	0	0	0	0	0	2.00048844	0	0	0	0	0	0	0	4.001954397	0	0	0	0	0	0	0	0	0	0	0	0	0	0	0	0	0	0	0	0	0	0	0	0	0	0	0	0	1.00012209	0	0
ENSDARG00000002220	0	0	0	0	0	0	0	2.00048844	0	1.00012209	0	0	0	0	0	0	0	1.00012209	0	0	0	0	0	0	1.00012209	0	0	0	0	0	0	0	0	0	0	0	0	0	0	0	0	0	0	0	0	0	6.004398828	0	0
ENSDARG00000002226	0	0	0	0	0	0	0	0	0	1.00012209	0	0	0	0	0	0	0	0	0	0	0	0	0	0	0	0	0	0	0	0	0	0	0	0	0	0	0	0	0	0	0	0	0	0	0	0	0	0	0
ENSDARG00000002231	0	0	0	0	0	0	0	0	0	0	0	0	0	0	0	0	0	0	0	0	0	0	2.00048844	0	0	0	0	0	0	0	0	0	0	0	0	0	0	0	0	0	0	0	0	0	0	0	0	0	0
ENSDARG00000002235	0	0	0	0	0	0	0	0	0	0	0	0	0	0	0	0	1.00012209	25.07660581	0	0	0	0	0	0	0	0	0	0	0	0	0	0	0	0	0	0	0	0	0	1.00012209	0	0	0	0	0	0	1.00012209	0	0
ENSDARG00000002240	0	0	0	0	0	0	0	1.00012209	0	3.00109917	0	0	0	1.00012209	0	0	0	8.007822687	0	0	0	0	1.00012209	0	0	0	0	0	0	0	2.00048844	0	0	0	2.00048844	0	0	0	0	0	0	0	0	0	0	0	2.00048844	0	0
ENSDARG00000002241	0	0	0	0	0	0	0	0	0	0	0	0	0	0	0	0	0	0	0	0	0	0	0	0	0	0	0	0	0	0	0	0	0	0	0	0	0	0	0	0	0	0	0	0	0	0	0	0	0
ENSDARG00000002249	1.00012209	0	0	0	0	0	0	0	0	1.00012209	0	0	0	0	1.00012209	0	0	1.00012209	0	0	0	0	0	0	0	0	0	0	0	0	0	0	0	0	2.00048844	0	0	0	0	0	0	0	0	0	0	0	0	0	0
ENSDARG00000002255	0	0	0	0	0	0	0	0	0	0	0	0	0	0	0	0	0	0	0	0	0	0	0	0	0	0	0	0	0	0	0	0	0	0	0	0	0	0	0	0	0	0	0	0	0	0	0	0	0
ENSDARG00000002264	0	0	0	0	0	0	0	0	0	0	0	0	0	0	0	0	0	0	0	0	0	0	0	0	0	0	0	0	0	0	0	1.00012209	0	0	0	0	0	0	0	0	0	0	0	0	0	0	0	0	0
ENSDARG00000002267	0	0	0	0	0	0	0	1.00012209	0	0	0	0	0	0	0	0	0	2.00048844	1.00012209	0	0	0	0	0	0	0	0	0	0	0	0	0	0	0	0	0	0	0	0	0	0	0	0	0	0	0	0	0	0
ENSDARG00000002271	0	0	0	0	0	0	1.00012209	4.001954397	1.00012209	17.03537624	0	0	0	1.00012209	0	0	0	4.001954397	0	0	0	0	2.00048844	0	7.005988269	0	0	0	0	1.00012209	0	1.00012209	2.00048844	1.00012209	3.00109917	1.00012209	0	0	0	1.00012209	0	0	0	0	0	1.00012209	5.003054244	0	0
ENSDARG00000002285	0	0	0	0	0	0	0	0	0	0	0	0	0	0	0	0	0	0	0	0	0	0	0	0	0	0	0	0	0	0	0	0	0	0	0	0	0	0	0	0	0	0	0	0	0	0	0	0	0
ENSDARG00000002298	1.00012209	0	0	0	0	0	0	0	0	0	0	0	0	0	0	0	0	0	0	0	0	0	0	0	0	0	0	0	0	0	0	0	0	0	0	0	0	0	0	0	0	0	0	0	0	0	0	0	0
ENSDARG00000002299	0	0	0	0	0	0	0	0	0	0	0	0	0	0	0	0	0	0	0	0	0	0	0	0	0	0	0	0	0	0	0	0	0	0	0	0	0	0	0	0	0	0	0	0	0	0	0	0	0
ENSDARG00000002300	0	0	0	0	0	0	0	0	0	0	0	0	0	0	0	0	0	0	0	0	0	0	0	0	0	0	0	0	0	0	0	0	0	0	0	0	0	0	0	0	0	0	0	0	0	0	0	0	0
ENSDARG00000002303	0	0	0	0	0	0	0	1.00012209	0	2.00048844	0	2.00048844	1.00012209	0	0	0	0	8.007822687	0	0	0	0	0	0	1.00012209	0	0	0	0	0	0	1.00012209	0	0	0	0	0	0	0	0	0	0	0	0	0	0	0	0	0
ENSDARG00000002304	0	0	0	0	0	0	0	0	0	0	0	0	0	0	0	0	0	0	0	0	0	0	0	0	0	0	0	0	0	0	0	0	0	0	0	0	0	0	0	0	0	0	0	0	0	0	0	0	0
ENSDARG00000002305	0	0	0	0	0	0	0	0	0	6.004398828	0	0	0	0	1.00012209	0	0	4.001954397	0	0	0	0	0	0	1.00012209	0	0	0	0	0	0	1.00012209	0	0	0	0	0	0	0	0	0	0	0	0	0	0	2.00048844	0	0
ENSDARG00000002332	0	0	0	0	0	0	0	0	0	0	0	0	0	0	0	0	0	1.00012209	0	0	0	0	0	0	0	0	0	0	0	0	1.00012209	0	0	0	0	0	0	0	0	0	0	0	0	0	0	0	0	0	0
ENSDARG00000002333	0	0	0	0	0	0	0	2.00048844	0	0	0	0	0	0	1.00012209	0	0	0	2.00048844	0	0	0	0	0	0	0	0	0	0	0	0	0	0	0	0	0	0	0	0	0	0	0	0	0	0	0	0	0	0
ENSDARG00000002336	0	0	0	0	0	0	0	0	0	0	0	0	0	0	0	0	0	0	0	0	0	0	0	0	0	0	0	0	0	0	0	0	0	0	0	0	7.005988269	0	0	1.00012209	0	0	0	0	0	0	0	0	0
ENSDARG00000002339	0	0	0	0	0	0	0	0	0	0	0	0	0	0	0	0	0	1.00012209	0	0	0	0	0	0	0	0	0	0	1.00012209	0	0	0	0	0	0	0	0	0	0	0	0	0	0	0	0	0	0	0	0
ENSDARG00000002344	8.007822687	0	1.00012209	0	0	3.00109917	1.00012209	17.03537624	0	3.00109917	0	3.00109917	0	0	2.00048844	0	0	14.02398044	2.00048844	0	0	0	17.03537624	0	0	0	0	0	0	0	1.00012209	4.001954397	2.00048844	1.00012209	2.00048844	0	2.00048844	0	0	8.007822687	0	0	0	0	0	0	17.03537624	0	0
ENSDARG00000002353	3.00109917	0	0	0	0	0	0	0	0	0	0	0	0	0	0	0	0	0	0	0	0	0	1.00012209	0	0	0	0	0	0	0	0	0	0	0	1.00012209	0	0	0	0	0	0	0	0	0	0	0	0	0	0
ENSDARG00000002355	0	0	0	0	0	0	0	0	0	0	0	0	0	0	0	0	0	0	0	0	0	0	0	0	0	0	0	0	0	0	0	0	0	0	0	0	0	0	0	0	0	0	0	0	0	0	0	0	0
ENSDARG00000002362	0	0	0	0	0	0	0	0	0	1.00012209	0	0	0	0	0	0	0	0	0	0	0	0	0	0	1.00012209	0	0	0	0	0	1.00012209	0	0	0	0	0	0	0	0	1.00012209	0	0	0	0	0	0	0	0	0
ENSDARG00000002365	0	0	0	0	0	0	0	0	0	0	0	0	0	0	0	0	0	1.00012209	0	0	0	0	0	0	0	0	0	0	0	0	0	0	0	0	0	0	0	0	0	0	0	1.00012209	0	0	0	0	0	0	0
ENSDARG00000002369	1.00012209	3.00109917	2.00048844	0	0	0	0	8.007822687	1.00012209	129.0105403	0	7.005988269	0	1.00012209	3.00109917	1.00012209	1.00012209	18.03966704	16.03133162	0	0	3.00109917	21.05401772	0	3.00109917	0	0	0	0	1.00012209	9.009902203	12.01761253	5.003054244	3.00109917	11.01479701	0	7.005988269	0	0	6.004398828	0	0	0	1.00012209	0	0	91.00349642	1.00012209	0
ENSDARG00000002377	0	0	0	0	0	0	0	1.00012209	0	2.00048844	0	0	0	0	0	0	0	0	0	0	0	0	0	0	0	0	0	0	0	0	0	0	0	0	0	0	0	0	0	0	0	0	0	0	0	0	0	0	0
ENSDARG00000002385	0	0	0	0	0	0	0	0	0	0	0	0	0	0	0	0	0	2.00048844	0	0	0	0	1.00012209	0	0	0	0	0	0	0	0	0	0	0	0	1.00012209	0	0	0	0	0	0	0	0	0	0	4.001954397	0	0
ENSDARG00000002396	0	0	0	0	0	0	0	0	0	0	0	0	0	0	0	0	0	0	1.00012209	0	0	0	0	0	0	0	0	0	0	0	0	0	0	0	0	0	0	0	0	0	0	0	0	0	0	0	0	0	0
ENSDARG00000002400	0	0	0	0	0	0	0	0	0	1.00012209	0	0	0	0	0	0	0	4.001954397	1.00012209	0	0	0	3.00109917	0	0	0	0	0	0	0	1.00012209	0	0	0	0	0	0	0	0	0	0	0	0	0	0	0	6.004398828	0	0
ENSDARG00000002401	0	0	0	0	0	0	0	1.00012209	0	0	0	0	0	0	0	1.00012209	0	2.00048844	0	0	0	0	1.00012209	0	0	0	0	0	0	0	0	0	0	0	0	0	1.00012209	0	0	0	0	0	0	0	0	0	3.00109917	0	0
ENSDARG00000002402	0	0	0	0	0	0	0	1.00012209	0	0	0	0	0	0	0	0	0	0	0	0	0	0	0	0	0	0	0	0	0	0	0	0	1.00012209	0	0	0	0	0	0	0	0	0	0	0	0	0	3.00109917	0	0
ENSDARG00000002403	0	0	0	0	0	0	0	0	0	0	0	0	0	0	0	0	0	0	0	0	0	0	0	0	0	0	0	0	0	0	0	0	0	0	0	0	0	0	0	0	0	0	0	0	0	0	0	0	0
ENSDARG00000002405	0	0	0	0	0	1.00012209	0	0	0	0	0	0	0	0	0	0	0	0	0	0	0	0	0	0	0	0	0	0	0	0	0	0	0	0	0	0	0	0	0	0	0	0	0	0	0	0	0	0	0
ENSDARG00000002412	0	0	0	0	0	0	0	0	0	0	0	0	0	0	0	0	0	0	0	0	0	0	0	0	0	0	0	0	0	0	0	0	0	0	0	0	0	0	0	0	0	0	0	0	0	0	0	0	0
ENSDARG00000002414	0	0	0	0	0	0	0	4.001954397	0	0	0	0	0	0	0	0	0	2.00048844	0	0	0	0	0	0	0	0	0	0	0	0	0	0	0	0	0	0	0	0	0	0	0	2.00048844	0	0	0	0	0	0	0
ENSDARG00000002445	0	0	0	0	0	0	0	0	0	0	0	0	0	0	0	0	0	0	0	0	0	0	28.09614152	0	0	0	0	0	0	0	0	0	0	0	0	0	0	0	0	0	0	0	0	0	0	0	1.00012209	0	0
ENSDARG00000002463	0	0	0	0	0	0	0	0	0	1.00012209	0	0	0	0	0	0	0	1.00012209	0	0	0	0	0	0	0	0	0	0	0	0	0	0	0	0	0	0	0	0	0	0	0	0	0	0	0	0	1.00012209	0	0
ENSDARG00000002467	0	0	0	0	0	0	0	0	0	0	0	0	0	0	0	0	0	0	0	0	0	0	0	0	0	0	0	0	0	0	0	0	0	0	0	0	0	0	0	0	0	0	0	0	0	0	0	0	0
ENSDARG00000002483	0	0	0	0	0	0	0	0	0	0	0	0	0	0	0	0	0	0	0	0	0	0	0	0	0	0	0	0	0	0	0	0	0	0	0	0	0	0	0	0	0	0	0	0	0	0	0	0	0
ENSDARG00000002487	0	0	0	0	0	0	0	0	0	0	0	1.00012209	0	0	0	0	0	3.00109917	0	0	0	0	0	0	0	0	0	0	0	0	0	0	0	0	0	0	0	0	0	1.00012209	0	0	0	0	0	0	1.00012209	0	0
ENSDARG00000002506	0	0	0	0	0	0	0	0	0	1.00012209	0	0	0	0	0	0	0	2.00048844	0	0	0	0	0	0	0	0	0	0	0	0	0	0	0	0	0	0	0	0	0	1.00012209	0	0	0	0	0	0	6.004398828	0	0
ENSDARG00000002507	0	0	0	0	0	0	0	0	0	0	0	0	0	0	0	0	0	0	1.00012209	0	0	0	0	0	1.00012209	0	0	0	0	0	0	0	0	0	0	0	0	0	0	0	0	0	0	0	0	0	0	0	0
ENSDARG00000002508	0	0	0	0	0	0	0	0	0	0	0	0	0	0	0	0	0	0	0	0	0	0	0	0	0	0	0	0	0	0	0	0	0	0	0	0	0	0	0	0	0	0	0	0	0	0	0	0	0
ENSDARG00000002509	0	0	0	0	0	0	0	3.00109917	0	0	0	0	0	0	0	0	0	0	0	0	0	0	12.01761253	0	0	0	0	0	0	0	0	0	0	0	0	0	0	0	0	0	0	0	0	0	0	0	0	0	0
ENSDARG00000002510	0	0	0	0	0	0	0	0	0	0	0	0	0	0	0	0	0	2.00048844	0	0	0	0	0	0	0	0	0	0	0	0	1.00012209	1.00012209	0	0	0	0	0	0	0	0	0	0	0	0	0	0	2.00048844	0	0
ENSDARG00000002523	0	0	0	0	0	0	0	0	0	1.00012209	0	0	0	0	0	0	0	2.00048844	0	0	0	0	0	0	1.00012209	0	0	0	0	0	0	0	0	0	0	0	0	0	0	2.00048844	0	0	0	0	0	0	0	0	0
ENSDARG00000002533	0	0	0	0	0	0	0	0	0	0	0	0	0	0	0	0	0	0	0	0	0	0	0	0	0	0	0	0	0	0	0	0	0	0	0	0	0	0	0	0	0	0	0	0	0	0	0	0	0
ENSDARG00000002536	0	0	0	0	0	0	0	1.00012209	0	0	0	0	0	0	0	0	0	0	0	0	0	0	0	0	0	0	0	0	0	0	0	0	0	0	0	0	0	0	0	0	0	0	0	0	0	0	1.00012209	0	0
ENSDARG00000002538	0	0	0	0	0	0	0	1.00012209	0	0	0	0	0	0	0	0	0	1.00012209	0	0	0	0	0	0	0	0	0	0	0	0	0	0	0	0	0	0	0	0	0	0	0	0	0	0	0	0	0	0	0
ENSDARG00000002549	0	0	0	0	0	0	0	0	0	0	0	0	0	0	0	0	0	0	0	0	0	0	0	0	0	0	0	0	0	0	0	0	0	0	0	0	1.00012209	0	0	2.00048844	0	0	0	0	0	0	0	0	0
ENSDARG00000002552	1.00012209	0	0	0	0	0	0	0	0	3.00109917	0	2.00048844	0	0	0	0	0	7.005988269	1.00012209	0	0	0	1.00012209	0	0	0	0	0	0	0	0	0	1.00012209	1.00012209	0	0	2.00048844	0	0	0	0	0	0	0	0	0	7.005988269	0	0
ENSDARG00000002564	0	0	0	0	0	0	0	0	0	0	0	0	0	0	0	0	0	0	0	0	0	0	0	0	0	0	0	0	0	0	0	0	0	0	0	0	0	0	0	0	0	0	0	0	0	0	0	0	0
ENSDARG00000002571	0	0	0	0	0	1.00012209	1.00012209	8.007822687	0	2.00048844	0	0	0	0	0	0	0	1.00012209	3.00109917	0	0	0	0	0	0	0	0	0	0	0	4.001954397	1.00012209	1.00012209	0	5.003054244	0	7.005988269	0	0	0	0	0	0	0	0	0	1.00012209	0	0
ENSDARG00000002576	0	0	0	0	0	0	0	0	0	0	0	0	0	0	0	0	0	0	0	0	0	0	0	0	0	0	0	0	0	0	0	0	0	0	0	0	0	0	0	0	0	0	0	0	0	0	0	0	0
ENSDARG00000002587	0	0	0	0	0	0	0	0	0	0	0	0	0	0	1.00012209	0	0	7.005988269	1.00012209	0	0	0	0	0	0	0	0	0	0	0	2.00048844	0	0	0	3.00109917	0	1.00012209	0	0	0	0	0	0	0	0	0	1.00012209	0	0
ENSDARG00000002589	0	0	0	0	0	0	0	0	0	0	0	0	0	0	0	0	0	0	0	0	0	0	0	0	0	0	0	0	0	0	0	0	0	0	0	0	0	0	0	0	0	0	0	0	0	0	0	0	0
ENSDARG00000002591	0	0	0	0	0	0	0	0	0	0	0	0	0	0	0	0	0	2.00048844	0	0	0	0	0	0	1.00012209	0	0	0	0	0	0	0	0	0	0	0	0	0	0	0	0	0	0	0	0	0	3.00109917	0	0
ENSDARG00000002600	0	0	0	0	0	0	0	0	0	0	0	0	0	0	0	0	0	0	0	0	0	0	0	0	0	0	0	0	0	0	0	0	0	0	0	0	0	0	0	0	0	0	0	0	0	0	0	0	0
ENSDARG00000002607	0	0	0	0	0	0	0	0	0	0	0	0	0	0	0	0	0	0	0	0	0	0	0	0	0	0	0	0	0	0	0	0	0	0	1.00012209	0	0	0	0	0	0	0	0	0	0	0	0	0	0
ENSDARG00000002609	0	0	0	0	0	0	0	0	0	1.00012209	0	0	0	0	0	0	0	0	0	0	0	0	0	0	0	0	0	0	0	0	0	0	0	0	0	0	0	0	0	0	0	0	0	0	0	0	0	0	0
ENSDARG00000002613	0	0	0	0	0	0	0	0	0	0	0	1.00012209	0	0	0	0	0	1.00012209	0	0	0	0	0	0	0	0	0	0	0	0	0	0	0	0	0	0	0	0	0	1.00012209	0	0	0	0	0	0	1.00012209	0	0
ENSDARG00000002614	0	0	0	0	0	0	0	0	0	0	0	2.00048844	0	0	0	0	0	0	0	0	0	0	0	0	0	0	0	0	0	0	0	2.00048844	0	0	0	0	0	0	0	0	0	0	0	0	0	0	0	0	0
ENSDARG00000002632	1.00012209	0	0	1.00012209	0	1.00012209	1.00012209	3.00109917	0	4.001954397	0	0	0	0	0	0	0	11.01479701	2.00048844	0	0	0	2.00048844	0	0	0	0	0	0	0	4.001954397	2.00048844	2.00048844	1.00012209	1.00012209	0	0	0	0	1.00012209	0	3.00109917	0	0	0	0	5.003054244	0	0
ENSDARG00000002634	0	0	0	0	0	0	0	0	0	0	0	0	0	0	0	0	0	0	0	0	0	0	0	0	0	0	0	0	0	0	0	0	0	0	0	0	0	0	0	0	0	0	0	0	0	0	0	0	0
ENSDARG00000002635	0	0	0	0	0	0	0	0	0	2.00048844	0	0	0	0	0	0	0	0	0	0	0	0	0	0	0	0	0	0	0	0	0	0	0	0	0	0	0	0	0	0	0	0	0	0	0	0	0	0	0
ENSDARG00000002642	0	0	0	0	0	0	0	0	0	1.00012209	0	0	0	0	0	0	0	1.00012209	0	0	0	0	0	0	0	0	0	0	0	0	0	0	0	0	0	0	0	0	0	0	0	0	0	0	0	0	0	0	0
ENSDARG00000002644	0	0	0	0	0	0	0	0	0	0	0	0	0	0	0	0	0	9.009902203	0	0	0	0	0	0	0	0	1.00012209	0	0	0	0	0	0	0	0	0	0	0	0	0	0	0	0	0	0	0	0	0	0
ENSDARG00000002656	0	0	0	0	0	0	0	0	0	0	0	0	0	0	0	0	0	0	0	0	0	0	0	0	0	0	0	0	0	0	0	0	0	0	0	0	0	0	0	0	0	0	0	0	0	0	0	0	0
ENSDARG00000002659	0	0	0	0	0	0	0	3.00109917	0	0	0	0	0	0	0	0	0	3.00109917	1.00012209	0	0	0	3.00109917	0	0	0	1.00012209	0	0	0	0	0	0	0	1.00012209	0	0	0	0	1.00012209	0	0	0	0	0	0	3.00109917	0	0
ENSDARG00000002663	1.00012209	0	0	1.00012209	0	0	0	9.009902203	0	3.00109917	0	2.00048844	0	0	0	0	0	4.001954397	0	0	0	0	4.001954397	0	1.00012209	0	0	0	0	0	0	1.00012209	0	0	0	0	2.00048844	0	0	0	0	0	0	0	0	0	0	0	0
ENSDARG00000002666	0	0	0	0	0	0	0	0	0	0	0	0	0	0	0	0	0	0	0	0	0	0	1.00012209	0	0	0	0	0	0	0	0	0	0	0	0	0	0	0	0	0	0	0	0	0	0	0	0	0	0
ENSDARG00000002670	0	0	0	0	0	0	0	0	0	0	0	0	0	0	0	0	0	0	0	0	0	0	0	0	0	0	0	0	0	0	0	0	0	0	0	0	0	0	0	0	0	0	0	0	0	0	0	0	0
ENSDARG00000002682	0	0	0	0	0	0	0	1.00012209	0	6.004398828	0	0	0	0	1.00012209	0	0	1.00012209	0	0	0	0	0	0	0	0	0	0	0	0	0	0	0	0	0	0	0	0	0	0	0	0	0	0	0	0	0	0	0
ENSDARG00000002690	0	0	0	1.00012209	0	0	0	0	0	0	0	0	0	0	0	0	0	0	0	0	0	0	0	0	0	0	0	0	0	0	0	0	0	0	0	0	1.00012209	0	0	0	0	0	0	0	0	0	1.00012209	0	0
ENSDARG00000002701	0	0	0	0	0	0	0	0	0	0	0	1.00012209	0	0	0	0	0	2.00048844	0	0	0	0	0	0	0	0	0	0	0	0	0	0	0	0	0	0	0	0	0	0	0	0	0	0	0	0	0	0	0
ENSDARG00000002702	0	0	0	0	0	0	0	0	0	0	0	0	0	0	0	0	0	0	0	0	0	0	0	0	0	0	0	0	0	0	0	0	0	0	0	0	0	0	0	0	0	0	0	0	0	0	0	0	0
ENSDARG00000002707	0	0	0	0	0	0	0	0	0	0	0	0	0	0	0	0	0	0	0	0	0	0	0	0	0	0	0	0	0	0	0	0	0	0	0	0	0	0	0	0	0	0	0	0	0	0	0	0	0
ENSDARG00000002710	2.00048844	0	0	0	0	0	0	0	0	1.00012209	0	0	0	0	1.00012209	0	0	1.00012209	0	0	0	0	2.00048844	0	1.00012209	0	0	0	0	0	2.00048844	0	0	0	0	0	0	0	0	2.00048844	0	0	0	1.00012209	0	0	3.00109917	0	0
ENSDARG00000002720	0	0	1.00012209	0	0	1.00012209	0	0	0	0	0	0	0	0	0	0	0	0	0	0	0	0	1.00012209	0	0	0	0	0	0	0	0	0	0	0	0	0	0	0	0	0	0	0	0	0	0	0	0	0	0
ENSDARG00000002731	0	0	0	1.00012209	0	1.00012209	1.00012209	1.00012209	0	5.003054244	0	0	0	0	1.00012209	0	0	9.009902203	0	0	0	0	6.004398828	0	1.00012209	0	1.00012209	0	0	1.00012209	0	4.001954397	0	0	3.00109917	0	0	0	0	3.00109917	0	3.00109917	0	0	0	0	7.005988269	0	0
ENSDARG00000002745	0	0	0	0	1.00012209	0	0	1.00012209	0	2.00048844	0	2.00048844	1.00012209	0	1.00012209	0	0	7.005988269	0	0	0	0	3.00109917	0	0	0	0	0	0	0	1.00012209	0	0	1.00012209	0	0	0	0	0	0	1.00012209	2.00048844	0	0	0	0	0	0	0
ENSDARG00000002748	0	0	0	0	0	0	0	0	0	0	0	0	0	0	0	0	0	0	0	0	0	0	0	0	0	0	0	0	0	0	0	0	1.00012209	0	2.00048844	0	1.00012209	0	0	2.00048844	0	0	0	0	0	0	0	0	0
ENSDARG00000002750	0	0	0	0	0	0	0	0	0	0	0	0	0	0	0	0	0	0	0	0	0	0	0	0	0	0	0	0	0	0	0	0	0	0	4.001954397	0	0	0	0	0	0	0	0	0	0	0	0	0	0
ENSDARG00000002754	0	0	0	0	0	0	0	0	0	0	0	0	0	0	0	0	0	0	0	0	0	0	0	0	0	0	0	0	0	0	0	0	0	0	0	0	0	0	0	0	0	0	0	0	0	0	0	0	0
ENSDARG00000002758	2.00048844	0	0	0	0	0	0	4.001954397	0	4.001954397	0	0	0	0	0	1.00012209	0	1.00012209	5.003054244	0	0	0	1.00012209	0	0	0	0	0	0	0	0	1.00012209	0	0	0	0	1.00012209	0	0	0	0	0	0	0	0	0	3.00109917	0	0
ENSDARG00000002760	0	0	0	0	0	0	0	0	0	0	0	0	0	0	0	0	0	0	0	0	0	0	0	0	0	0	0	0	0	0	0	0	0	0	0	0	0	0	0	0	0	0	0	0	0	0	1.00012209	0	0
ENSDARG00000002776	0	0	0	0	0	0	0	0	0	0	0	0	0	0	0	0	0	0	0	0	0	0	0	0	0	0	0	0	0	0	0	0	0	0	0	0	0	0	0	0	0	0	0	0	0	0	0	0	0
ENSDARG00000002787	0	0	0	0	0	0	0	0	0	0	0	0	0	0	0	0	0	0	0	0	0	0	1.00012209	0	0	0	0	0	0	0	0	0	0	0	0	0	0	0	0	1.00012209	0	0	0	0	0	0	0	0	0
ENSDARG00000002790	1.00012209	0	0	0	0	0	0	2.00048844	1.00012209	1.00012209	0	0	0	0	2.00048844	0	0	11.01479701	4.001954397	0	0	0	5.003054244	0	1.00012209	0	0	0	0	0	1.00012209	2.00048844	1.00012209	0	0	0	1.00012209	0	0	0	0	0	0	0	0	0	5.003054244	0	0
ENSDARG00000002791	2.00048844	2.00048844	0	1.00012209	0	2.00048844	0	2.00048844	0	42.21681544	0	2.00048844	1.00012209	1.00012209	0	0	0	6.004398828	2.00048844	0	0	0	9.009902203	0	5.003054244	0	1.00012209	0	2.00048844	3.00109917	3.00109917	2.00048844	1.00012209	0	3.00109917	1.00012209	1.00012209	0	0	2.00048844	0	11.01479701	0	4.001954397	0	0	29.10314829	0	0
ENSDARG00000002792	0	0	0	0	0	0	0	1.00012209	0	0	0	0	0	0	0	0	0	10.01222694	0	0	0	0	0	0	0	0	0	0	0	0	0	0	0	0	0	0	0	0	0	0	0	0	0	0	0	0	0	0	0
ENSDARG00000002794	0	0	0	0	0	0	0	0	0	0	0	0	0	0	0	0	0	0	0	0	0	0	0	0	0	0	0	0	0	0	0	0	0	0	0	0	0	0	0	0	0	0	0	0	0	0	0	0	0
ENSDARG00000002795	0	0	0	0	0	0	0	0	0	0	0	0	0	0	0	0	0	0	0	0	0	0	0	0	0	0	0	0	0	0	0	0	0	0	0	0	0	0	0	0	0	0	0	0	0	0	0	0	0
ENSDARG00000002797	0	0	0	0	0	0	0	0	0	0	0	0	0	0	0	0	0	0	0	0	0	0	0	0	0	0	0	0	0	0	0	0	0	0	0	0	0	0	0	0	0	0	0	0	0	0	0	0	0
ENSDARG00000002798	0	0	0	0	0	0	0	0	0	1.00012209	0	0	0	0	0	0	0	0	0	0	0	0	0	0	1.00012209	0	0	0	0	0	0	0	0	0	0	0	0	0	0	0	0	0	0	0	0	0	0	0	0
ENSDARG00000002826	0	0	0	0	0	0	0	0	0	0	0	0	0	0	0	0	0	0	0	0	0	0	0	0	0	0	0	0	0	0	0	0	0	0	0	0	0	0	0	0	0	0	0	0	0	0	1.00012209	0	0
ENSDARG00000002830	1.00012209	0	0	0	0	0	0	0	0	0	0	0	0	0	1.00012209	0	0	0	1.00012209	0	0	0	0	0	0	0	0	0	0	0	0	0	0	0	0	2.00048844	5.003054244	0	0	0	0	0	0	0	0	0	0	0	0
ENSDARG00000002831	0	0	0	0	0	0	0	0	0	0	0	0	0	0	0	0	0	0	0	0	0	0	0	0	0	0	0	0	0	0	0	0	0	0	0	0	0	0	0	0	0	0	0	0	0	0	0	0	0
ENSDARG00000002837	0	0	0	0	0	0	0	0	0	0	0	0	0	0	0	0	0	0	0	0	0	0	0	0	0	0	0	0	0	0	0	0	0	0	0	0	0	0	0	0	0	0	0	0	0	0	0	0	0
ENSDARG00000002840	0	0	0	0	0	0	0	0	0	0	0	0	0	0	0	0	0	0	0	0	0	0	0	0	0	0	0	0	0	0	0	1.00012209	0	0	0	0	0	0	0	0	0	1.00012209	0	0	0	0	2.00048844	0	0
ENSDARG00000002847	0	0	0	0	0	0	0	0	0	0	0	0	0	0	0	0	0	0	0	0	0	0	0	0	0	0	0	0	0	0	0	0	0	0	0	0	0	0	0	0	0	0	0	0	0	0	0	0	0
ENSDARG00000002872	0	0	0	0	0	0	0	0	0	0	0	0	0	0	0	0	0	0	0	0	0	0	0	0	0	0	0	0	0	0	0	0	0	0	0	1.00012209	0	0	0	0	0	0	0	0	0	0	0	0	0
ENSDARG00000002877	0	0	0	0	0	0	0	2.00048844	0	0	0	0	0	0	0	0	0	0	0	0	0	0	0	0	1.00012209	0	0	0	0	0	0	0	0	0	0	0	0	0	0	0	0	0	0	0	0	0	1.00012209	0	0
ENSDARG00000002880	0	0	0	0	0	0	0	0	0	0	0	0	0	0	0	0	0	0	0	0	0	0	0	0	0	0	0	0	0	0	0	0	0	0	0	0	0	0	0	0	0	0	0	0	0	0	0	0	0
ENSDARG00000002894	0	0	0	0	0	0	0	0	0	0	0	0	0	0	0	0	0	1.00012209	0	0	0	0	0	0	0	0	0	0	0	0	0	0	0	0	0	0	0	0	0	0	0	0	0	0	0	0	1.00012209	0	0
ENSDARG00000002897	0	0	0	0	0	0	0	2.00048844	0	3.00109917	0	0	0	0	0	0	0	2.00048844	0	0	0	0	3.00109917	0	0	0	0	0	0	0	2.00048844	0	0	0	0	0	2.00048844	0	0	0	0	0	0	0	0	0	3.00109917	0	0
ENSDARG00000002898	0	0	0	0	0	0	0	0	0	0	0	0	0	0	0	0	0	0	0	0	0	0	0	0	0	0	0	0	0	0	0	0	0	0	0	0	0	0	0	0	0	0	0	0	0	0	0	0	0
ENSDARG00000002912	0	0	0	0	0	0	0	2.00048844	0	0	0	0	0	0	0	0	0	1.00012209	0	0	0	0	0	0	0	0	0	0	0	0	0	2.00048844	1.00012209	0	0	0	1.00012209	0	0	0	0	1.00012209	0	0	0	0	3.00109917	0	0
ENSDARG00000002916	0	0	0	0	0	0	0	0	0	0	0	0	0	0	0	0	0	1.00012209	0	0	0	0	0	0	1.00012209	0	0	0	0	0	0	1.00012209	0	0	0	0	0	0	0	1.00012209	0	0	0	0	0	0	3.00109917	0	0
ENSDARG00000002917	0	0	0	0	0	0	0	0	0	0	0	0	0	0	0	0	0	0	0	0	0	0	0	0	0	0	0	0	0	0	0	0	0	0	0	0	0	0	0	0	0	0	0	0	0	0	0	0	0
ENSDARG00000002933	0	0	0	0	0	0	0	0	0	0	0	0	0	0	0	0	0	0	0	0	0	0	0	0	0	0	0	0	0	0	0	0	0	0	0	0	0	0	0	0	0	0	0	0	0	0	0	0	0
ENSDARG00000002937	0	0	0	0	0	0	0	0	0	0	0	0	0	0	0	0	0	4.001954397	0	0	0	0	0	0	0	0	0	0	0	0	0	0	0	0	0	0	0	0	0	0	0	0	0	0	0	0	0	0	0
ENSDARG00000002945	0	0	0	0	0	0	0	0	0	0	0	0	1.00012209	0	1.00012209	0	0	0	0	0	0	0	0	0	0	0	0	0	0	0	0	0	0	0	1.00012209	0	0	0	0	0	0	0	0	0	0	0	8.007822687	0	0
ENSDARG00000002947	0	0	0	0	0	0	0	0	0	0	0	0	0	0	0	0	0	0	0	0	0	0	0	0	2.00048844	0	0	0	0	0	0	0	0	0	0	0	0	0	0	0	0	0	0	0	0	0	0	0	0
ENSDARG00000002949	0	0	1.00012209	0	0	0	0	1.00012209	0	2.00048844	0	0	0	0	0	0	0	2.00048844	1.00012209	0	0	0	1.00012209	0	1.00012209	0	0	0	0	0	0	0	0	0	0	0	0	0	0	0	0	0	0	0	0	0	0	0	0
ENSDARG00000002952	0	0	1.00012209	0	0	0	0	0	0	0	0	0	0	0	0	0	0	3.00109917	0	0	0	0	0	0	0	0	0	0	0	0	0	0	1.00012209	0	0	0	0	0	0	2.00048844	0	0	0	0	0	0	1.00012209	0	0
ENSDARG00000002956	0	0	0	0	0	0	0	0	0	0	0	0	0	0	0	0	0	0	0	0	0	0	0	0	0	0	0	0	0	0	0	0	0	0	0	0	0	0	0	0	0	0	0	0	0	0	0	0	0
ENSDARG00000002967	0	0	0	0	0	0	0	1.00012209	0	1.00012209	0	0	0	0	0	0	0	6.004398828	0	0	0	0	0	0	0	0	0	0	0	0	1.00012209	0	0	0	0	0	0	0	0	0	0	0	0	0	0	0	0	0	0
ENSDARG00000002970	0	0	0	0	0	0	0	2.00048844	0	0	0	0	0	0	0	0	0	3.00109917	0	0	0	0	0	0	0	0	0	0	0	0	0	0	0	0	0	0	0	0	0	0	0	0	0	0	0	0	0	0	0
ENSDARG00000002971	0	0	0	0	0	0	0	0	0	1.00012209	0	0	0	0	0	0	0	0	0	0	0	0	0	0	0	0	0	0	0	0	0	0	0	0	0	0	0	0	0	0	0	0	0	0	0	0	0	0	0
ENSDARG00000002980	0	0	0	0	0	0	0	0	0	0	0	0	0	0	0	0	0	0	0	0	0	0	0	0	0	0	0	0	0	0	0	0	0	0	0	0	0	0	0	0	0	0	0	0	0	0	0	0	0
ENSDARG00000002981	0	0	0	0	0	0	0	0	0	0	0	0	0	0	0	0	0	0	0	0	0	0	0	0	0	0	0	0	0	0	0	0	0	0	0	0	0	0	0	0	0	0	0	0	0	0	0	0	0
ENSDARG00000002986	0	0	0	0	0	0	0	0	0	0	0	0	0	0	0	0	0	0	0	0	0	0	0	0	0	0	0	0	0	0	0	0	0	0	0	0	0	0	0	0	0	0	0	0	0	0	0	0	0
ENSDARG00000002988	0	0	0	0	0	0	0	0	0	1.00012209	0	0	0	0	0	0	0	0	0	0	0	0	0	0	0	0	0	0	0	0	0	0	0	0	0	0	0	0	0	0	0	0	0	0	0	0	0	0	0
ENSDARG00000002991	0	0	0	0	0	0	0	0	0	0	0	0	0	0	0	0	0	0	0	0	0	0	0	0	0	0	0	0	0	0	0	0	0	0	0	0	0	0	0	0	0	0	0	0	0	0	0	0	0
ENSDARG00000002994	0	0	0	0	0	0	0	0	0	0	0	0	0	0	0	0	0	0	0	0	0	0	0	0	0	0	0	0	0	0	0	0	0	0	2.00048844	0	0	0	0	0	0	0	0	0	0	0	0	0	0
ENSDARG00000003008	1.00012209	0	0	0	0	0	1.00012209	0	0	1.00012209	0	0	0	0	0	0	0	0	0	0	0	0	0	0	0	0	0	0	0	0	0	0	0	0	1.00012209	0	0	0	0	0	0	0	0	0	0	0	0	0	0
ENSDARG00000003016	29.10314829	11.01479701	2.00048844	2.00048844	1.00012209	2.00048844	2.00048844	85.89435269	1.00012209	85.89435269	1.00012209	10.01222694	5.003054244	3.00109917	33.13365292	1.00012209	1.00012209	174.6720215	36.15913625	0	1.00012209	2.00048844	141.413275	3.00109917	5.003054244	0	0	0	0	2.00048844	21.05401772	10.01222694	32.12565488	1.00012209	28.09614152	1.00012209	17.03537624	0	1.00012209	66.53752025	2.00048844	4.001954397	2.00048844	0	0	1.00012209	221.9038069	0	0
ENSDARG00000003017	0	0	0	0	0	0	0	6.004398828	0	7.005988269	0	0	0	0	0	0	0	4.001954397	3.00109917	0	0	0	1.00012209	0	0	0	1.00012209	0	0	0	1.00012209	0	3.00109917	0	3.00109917	0	0	0	0	3.00109917	0	0	1.00012209	0	0	0	1.00012209	0	0
ENSDARG00000003021	0	0	0	0	0	0	0	0	0	0	0	0	0	0	0	0	0	1.00012209	0	0	0	0	0	0	0	0	0	0	0	0	0	0	0	0	0	0	0	0	0	0	0	0	0	0	0	0	0	0	0
ENSDARG00000003022	0	0	0	0	0	0	0	1.00012209	0	0	0	0	0	0	0	0	0	0	1.00012209	0	0	0	0	0	0	0	0	0	0	0	1.00012209	0	0	0	1.00012209	0	0	0	0	0	0	0	0	0	0	0	2.00048844	0	0
ENSDARG00000003027	0	0	0	0	0	0	0	0	0	0	0	0	0	0	0	0	0	0	0	0	0	0	0	0	0	0	0	0	0	0	0	0	0	0	0	0	0	0	0	0	0	0	0	0	0	0	0	0	0
ENSDARG00000003032	6.004398828	0	0	1.00012209	0	0	0	3.00109917	0	8.007822687	0	0	0	0	4.001954397	0	0	24.07058837	1.00012209	0	0	0	2.00048844	0	3.00109917	0	0	0	0	1.00012209	1.00012209	0	2.00048844	0	1.00012209	3.00109917	2.00048844	1.00012209	0	4.001954397	1.00012209	0	0	0	0	0	3.00109917	0	0
ENSDARG00000003035	0	0	0	0	0	1.00012209	1.00012209	3.00109917	0	4.001954397	0	0	0	0	0	0	0	3.00109917	0	0	0	0	6.004398828	0	2.00048844	0	0	0	0	1.00012209	0	2.00048844	0	0	1.00012209	0	0	0	0	1.00012209	0	0	0	0	0	0	1.00012209	0	0
ENSDARG00000003041	2.00048844	1.00012209	5.003054244	0	2.00048844	1.00012209	1.00012209	2.00048844	1.00012209	13.02067364	0	1.00012209	0	4.001954397	1.00012209	0	0	5.003054244	1.00012209	0	0	0	7.005988269	0	2.00048844	0	0	0	0	2.00048844	1.00012209	1.00012209	0	3.00109917	3.00109917	1.00012209	1.00012209	0	0	4.001954397	0	5.003054244	2.00048844	2.00048844	0	1.00012209	3.00109917	0	0
ENSDARG00000003046	1.00012209	0	0	0	0	0	0	0	0	34.14189908	0	0	0	0	0	0	0	2.00048844	0	0	0	1.00012209	0	0	7.005988269	0	0	0	0	1.00012209	1.00012209	1.00012209	0	2.00048844	0	1.00012209	0	0	0	2.00048844	0	5.003054244	0	0	0	2.00048844	0	0	1.00012209
ENSDARG00000003051	0	0	0	0	0	0	0	0	0	1.00012209	0	0	0	0	0	0	0	2.00048844	0	0	0	0	0	0	0	0	1.00012209	0	0	0	0	1.00012209	0	0	0	0	0	0	0	0	0	0	0	0	0	0	0	0	0
ENSDARG00000003054	0	0	0	0	0	0	0	0	0	0	0	0	0	0	0	0	0	0	0	0	0	0	0	0	0	0	0	0	0	0	0	0	0	0	0	0	0	0	0	0	0	0	0	0	0	0	0	0	0
ENSDARG00000003058	0	0	0	0	0	0	0	1.00012209	0	2.00048844	0	0	0	0	0	0	0	1.00012209	0	0	0	0	0	0	0	0	0	0	0	0	0	0	0	0	0	0	0	0	0	0	0	0	0	0	0	0	1.00012209	0	0
ENSDARG00000003061	0	1.00012209	0	0	0	0	0	1.00012209	0	1.00012209	0	0	0	0	0	0	0	2.00048844	0	0	0	0	5.003054244	0	0	0	0	0	0	1.00012209	1.00012209	0	1.00012209	0	0	0	1.00012209	0	0	1.00012209	0	0	0	0	0	0	28.09614152	0	0
ENSDARG00000003068	0	0	0	0	0	0	3.00109917	0	0	1.00012209	0	0	0	0	0	0	0	0	0	0	0	0	0	0	0	0	0	0	0	0	0	0	0	0	2.00048844	0	0	0	0	0	0	0	0	0	0	0	0	0	0
ENSDARG00000003069	0	0	0	0	0	0	0	0	0	0	0	1.00012209	0	0	0	0	0	1.00012209	0	0	0	0	0	0	0	0	0	0	0	0	2.00048844	0	0	0	0	0	0	0	0	0	0	0	0	0	0	0	0	0	0
ENSDARG00000003081	0	0	0	0	0	0	0	0	0	4.001954397	0	0	0	0	0	0	0	0	0	0	0	0	0	0	1.00012209	0	0	0	0	0	0	0	0	0	0	0	0	0	0	0	0	0	0	0	0	0	0	0	0
ENSDARG00000003084	0	0	0	0	0	0	0	0	0	0	0	0	0	0	0	0	0	0	0	0	0	0	0	0	0	0	0	0	0	0	0	0	0	0	0	0	0	0	0	0	0	0	0	0	0	0	1.00012209	0	0
ENSDARG00000003087	0	0	0	0	0	0	0	1.00012209	0	0	0	0	0	0	0	0	0	0	2.00048844	0	0	0	0	0	0	0	0	0	0	0	0	0	0	0	0	0	0	0	0	0	0	0	0	0	0	0	0	0	0
ENSDARG00000003098	0	0	0	0	0	0	0	0	0	0	0	0	0	0	0	0	0	3.00109917	0	0	0	0	3.00109917	0	0	0	0	0	0	0	0	0	0	0	0	0	0	0	0	0	0	0	0	0	0	0	1.00012209	0	0
ENSDARG00000003102	0	0	0	0	0	0	0	0	0	4.001954397	0	0	0	0	0	0	0	5.003054244	3.00109917	0	0	0	2.00048844	0	1.00012209	0	0	0	0	0	1.00012209	0	1.00012209	0	2.00048844	0	0	0	0	0	0	0	0	0	0	0	10.01222694	0	0
ENSDARG00000003109	0	0	0	0	0	0	2.00048844	0	0	3.00109917	0	2.00048844	0	0	0	0	0	0	4.001954397	0	0	0	29.10314829	0	0	0	0	0	0	0	14.02398044	1.00012209	1.00012209	1.00012209	2.00048844	0	0	0	0	0	0	0	0	1.00012209	0	0	11.01479701	0	0
ENSDARG00000003113	0	0	0	0	0	0	0	0	0	0	0	0	0	0	0	0	0	2.00048844	0	0	0	0	0	0	0	0	0	0	0	0	0	0	0	0	0	0	0	0	0	0	0	0	0	0	0	0	0	0	0
ENSDARG00000003127	0	0	0	0	0	0	0	0	0	1.00012209	0	0	0	0	2.00048844	0	0	0	0	0	0	0	0	0	0	0	0	0	0	0	0	0	0	0	1.00012209	0	0	0	0	0	0	0	0	0	0	0	2.00048844	0	0
ENSDARG00000003132	0	0	0	0	0	0	0	1.00012209	0	1.00012209	0	0	0	0	0	0	0	1.00012209	0	0	0	0	0	0	0	0	0	0	0	0	0	0	0	0	0	0	0	0	0	0	0	0	0	0	0	0	0	0	0
ENSDARG00000003142	0	0	0	0	0	0	0	0	0	0	0	0	0	0	0	0	0	0	0	0	0	0	0	0	0	0	0	0	0	0	1.00012209	0	0	0	0	0	0	0	0	0	0	0	0	0	0	0	0	0	0
ENSDARG00000003144	0	1.00012209	0	0	0	0	0	0	0	0	0	0	0	0	0	0	0	0	0	0	0	0	0	0	0	0	0	0	0	0	0	0	0	0	0	0	0	0	0	0	0	0	0	0	0	0	1.00012209	0	0
ENSDARG00000003145	0	0	0	0	0	0	0	1.00012209	0	0	0	0	0	0	0	0	0	2.00048844	0	0	0	0	0	0	0	0	0	0	0	0	0	0	0	0	1.00012209	0	0	0	0	0	0	0	0	0	0	0	1.00012209	0	0
ENSDARG00000003146	0	0	0	0	0	0	0	0	0	0	0	0	0	0	0	0	0	0	0	0	0	0	0	0	0	0	0	0	0	0	0	0	0	0	0	0	0	0	0	0	0	0	0	0	0	0	0	0	0
ENSDARG00000003151	1.00012209	0	0	0	0	0	0	0	0	9.009902203	0	4.001954397	1.00012209	0	1.00012209	0	0	17.03537624	1.00012209	0	0	0	0	0	0	0	1.00012209	0	1.00012209	0	2.00048844	0	1.00012209	0	3.00109917	0	0	0	0	1.00012209	0	0	0	0	0	1.00012209	11.01479701	0	0
ENSDARG00000003153	0	0	0	0	0	0	0	0	0	0	0	0	0	0	1.00012209	0	0	1.00012209	0	0	0	0	0	0	0	0	0	0	0	0	0	0	0	0	0	0	0	0	0	0	0	0	0	0	0	0	0	0	0
ENSDARG00000003157	0	0	0	0	0	0	0	0	0	0	0	0	0	0	0	0	0	0	0	0	0	0	0	0	0	0	0	0	0	0	0	0	0	0	0	0	0	0	0	0	0	0	0	0	0	0	0	0	0
ENSDARG00000003165	0	0	0	0	0	0	0	0	0	0	0	0	0	0	0	0	0	0	0	0	0	0	0	0	0	0	0	0	0	0	0	0	0	0	1.00012209	0	0	0	0	0	0	0	0	0	0	0	1.00012209	0	0
ENSDARG00000003167	0	0	0	0	0	0	0	1.00012209	0	0	0	0	0	0	0	0	0	1.00012209	0	0	0	0	0	0	0	0	0	0	0	0	0	0	0	0	0	0	0	0	0	0	0	0	0	0	0	0	0	0	0
ENSDARG00000003169	0	0	0	0	0	0	0	0	0	0	0	0	0	0	0	0	0	3.00109917	0	0	0	0	0	0	0	0	0	0	0	0	0	0	0	0	1.00012209	0	0	0	0	0	0	0	0	0	0	0	1.00012209	0	0
ENSDARG00000003175	0	0	0	0	0	0	0	2.00048844	0	0	0	0	0	0	0	0	0	0	0	0	0	0	0	0	0	0	0	0	0	0	0	0	0	0	0	0	0	0	0	0	0	0	0	0	0	0	0	0	0
ENSDARG00000003189	1.00012209	0	0	0	0	0	0	1.00012209	0	0	0	1.00012209	0	0	0	0	0	1.00012209	0	0	0	2.00048844	2.00048844	0	0	0	0	0	0	0	0	0	0	0	0	0	1.00012209	0	0	0	0	0	0	0	0	0	1.00012209	0	0
ENSDARG00000003191	0	0	0	0	0	0	0	1.00012209	0	20.04898766	0	1.00012209	0	0	0	0	0	1.00012209	0	0	0	0	1.00012209	0	0	0	0	0	0	0	0	1.00012209	0	0	0	0	0	0	0	0	0	0	0	0	0	0	1.00012209	0	0
ENSDARG00000003197	0	0	0	0	0	0	0	0	0	0	0	0	0	0	0	0	0	0	0	0	0	0	0	0	0	0	0	0	0	0	0	0	0	0	0	0	0	0	0	0	0	0	0	0	0	0	0	0	0
ENSDARG00000003205	0	0	0	0	0	0	0	0	0	0	0	0	0	0	0	0	0	0	0	0	0	0	0	0	0	0	0	0	0	0	0	0	0	0	0	0	0	0	0	0	0	0	0	0	0	0	0	0	0
ENSDARG00000003206	0	0	0	0	0	0	0	0	0	3.00109917	0	0	0	0	0	0	0	1.00012209	0	0	0	0	0	0	0	0	0	0	0	0	0	0	0	0	1.00012209	0	0	0	0	0	0	1.00012209	0	0	0	0	0	0	0
ENSDARG00000003207	0	0	0	0	0	0	0	0	0	0	0	0	0	0	0	0	0	0	0	0	0	0	0	0	0	0	0	0	0	0	0	0	0	0	0	0	0	0	0	0	0	0	0	0	0	0	0	0	0
ENSDARG00000003208	0	0	0	0	0	0	0	1.00012209	0	0	0	0	0	0	0	0	0	1.00012209	0	0	0	0	0	0	0	0	0	0	0	0	1.00012209	0	0	0	0	1.00012209	0	0	0	0	0	0	0	0	0	0	0	0	0
ENSDARG00000003213	0	0	0	0	0	0	0	0	0	0	0	0	0	0	0	0	0	2.00048844	0	0	0	0	4.001954397	0	1.00012209	0	0	0	0	0	0	0	0	0	0	0	0	0	0	0	0	0	0	0	0	0	1.00012209	0	0
ENSDARG00000003216	1.00012209	2.00048844	3.00109917	3.00109917	0	1.00012209	4.001954397	42.21681544	0	1.00012209	0	5.003054244	0	0	3.00109917	1.00012209	0	158.0088915	8.007822687	0	0	2.00048844	111.5040397	0	13.02067364	0	0	0	0	1.00012209	13.02067364	11.01479701	18.03966704	0	6.004398828	0	18.03966704	1.00012209	0	15.02753306	0	4.001954397	0	0	0	0	53.34588243	0	0
ENSDARG00000003217	0	0	0	0	0	0	0	1.00012209	0	0	0	0	0	0	0	0	0	0	0	0	0	0	0	0	0	0	0	0	0	0	0	0	0	0	0	0	0	0	0	0	0	1.00012209	0	0	0	0	0	0	0
ENSDARG00000003235	1.00012209	0	0	0	0	0	1.00012209	0	0	0	0	0	0	0	0	0	0	0	0	0	0	0	1.00012209	0	0	0	0	0	0	0	1.00012209	0	0	0	0	0	0	0	0	0	0	0	0	0	0	0	0	0	0
ENSDARG00000003244	0	0	0	0	0	0	0	0	0	0	0	0	0	0	0	0	0	0	0	0	0	0	0	0	0	0	0	0	0	0	0	0	0	0	0	0	0	0	0	0	0	0	0	0	0	0	0	0	0
ENSDARG00000003250	0	0	0	0	0	0	0	0	0	0	0	0	0	0	0	0	0	0	0	0	0	0	0	0	0	0	0	0	0	0	0	0	0	0	0	0	0	0	0	0	0	0	0	0	0	0	0	0	0
ENSDARG00000003251	0	0	0	0	0	0	0	0	0	0	0	0	0	0	0	0	0	0	0	0	0	0	0	0	0	0	0	0	0	0	0	0	0	0	0	0	0	0	0	0	0	0	0	0	0	0	0	0	0
ENSDARG00000003257	0	0	0	0	0	0	0	0	0	0	0	0	0	0	0	0	0	0	0	0	0	0	0	0	0	0	0	0	0	0	0	0	0	0	0	0	0	0	0	0	0	0	0	0	0	0	0	0	0
ENSDARG00000003259	0	0	0	0	0	0	0	0	0	0	0	0	0	0	0	0	0	20.04898766	0	0	0	0	0	0	0	0	0	0	0	0	0	0	0	0	0	0	0	0	0	0	0	0	0	0	0	0	0	0	0
ENSDARG00000003263	0	0	0	0	0	0	0	0	0	0	0	0	0	0	0	0	0	0	0	0	0	0	0	0	0	0	0	0	0	0	0	0	0	0	0	0	0	0	0	0	0	0	0	0	0	0	1.00012209	0	0
ENSDARG00000003269	0	0	0	0	0	0	0	0	0	0	0	0	0	0	0	0	0	0	0	0	0	0	0	0	0	0	0	0	0	0	0	0	0	0	0	0	0	0	0	1.00012209	0	0	0	0	0	0	0	0	0
ENSDARG00000003270	0	0	0	0	0	0	0	0	0	1.00012209	0	0	0	0	0	0	0	1.00012209	1.00012209	0	0	0	0	0	0	0	0	0	0	0	0	0	0	0	0	0	0	0	0	0	0	0	0	0	0	0	0	0	0
ENSDARG00000003281	0	0	0	0	0	2.00048844	0	0	0	4.001954397	0	0	0	0	0	0	0	0	0	0	0	0	0	0	0	0	0	0	0	0	0	0	0	0	0	0	0	0	0	2.00048844	0	0	0	1.00012209	0	0	0	0	0
ENSDARG00000003283	0	0	0	0	0	0	0	4.001954397	0	0	0	0	0	0	0	0	0	1.00012209	0	0	0	0	1.00012209	0	0	0	0	0	0	0	0	1.00012209	1.00012209	0	0	0	0	0	0	0	0	0	0	0	0	0	1.00012209	0	0
ENSDARG00000003287	0	0	0	0	0	0	0	0	0	1.00012209	0	0	0	0	0	0	0	2.00048844	1.00012209	0	0	0	0	0	0	0	0	0	0	0	0	0	0	0	0	0	0	0	0	0	0	0	0	0	0	0	0	0	0
ENSDARG00000003293	0	0	0	0	0	0	0	0	0	0	0	0	0	0	0	0	0	0	0	0	0	0	0	0	0	0	0	0	0	0	0	0	0	0	0	0	0	0	0	0	0	0	0	0	0	0	0	0	0
ENSDARG00000003303	0	0	0	0	0	0	0	0	0	0	0	0	0	0	0	0	0	1.00012209	0	0	0	0	0	0	0	0	0	0	0	0	2.00048844	0	0	0	0	0	0	0	0	0	0	0	0	0	0	0	14.02398044	0	0
ENSDARG00000003307	0	0	0	0	0	0	0	0	0	0	0	0	0	0	0	0	0	0	0	0	0	0	0	0	0	0	0	0	0	0	0	0	0	0	0	0	0	0	0	0	0	0	0	0	0	0	0	1.00012209	0
ENSDARG00000003308	0	0	0	0	0	0	0	2.00048844	0	6.004398828	0	1.00012209	0	0	0	0	0	3.00109917	0	0	0	1.00012209	1.00012209	0	1.00012209	0	0	0	0	0	0	1.00012209	0	0	0	0	0	0	0	0	0	0	0	0	0	0	3.00109917	0	0
ENSDARG00000003311	0	0	0	0	0	0	0	0	0	1.00012209	0	0	0	0	0	0	0	0	1.00012209	0	0	0	0	0	0	0	0	0	0	0	0	0	0	0	0	0	0	0	0	0	0	0	0	0	0	0	0	0	0
ENSDARG00000003317	0	0	0	0	0	0	0	0	0	0	0	0	0	0	0	0	0	0	0	0	0	0	0	0	0	0	0	0	0	0	0	0	0	0	0	0	1.00012209	0	0	0	0	0	0	0	0	0	0	0	0
ENSDARG00000003320	0	0	0	0	0	0	0	1.00012209	0	1.00012209	0	0	0	0	0	0	0	1.00012209	0	0	0	0	0	0	0	0	0	0	0	0	0	0	0	0	1.00012209	0	0	0	0	0	0	0	0	0	0	0	0	0	0
ENSDARG00000003323	0	0	0	0	0	0	0	0	0	0	0	1.00012209	0	0	0	0	0	0	0	0	0	0	0	0	0	0	0	0	0	0	0	0	0	0	0	0	0	0	0	0	0	0	0	0	0	0	0	0	0
ENSDARG00000003328	0	0	0	0	0	0	0	0	0	0	0	0	0	0	0	0	0	0	0	0	0	0	0	0	0	0	0	0	0	0	0	0	0	0	0	0	0	0	0	0	0	0	0	0	0	0	0	0	0
ENSDARG00000003373	0	0	0	0	0	0	0	0	0	0	0	0	0	0	0	0	0	0	0	0	0	0	1.00012209	0	0	0	0	0	0	0	0	0	0	0	0	0	0	0	0	1.00012209	0	0	0	0	0	0	0	0	0
ENSDARG00000003375	1.00012209	0	0	0	0	0	0	3.00109917	0	0	0	0	0	0	0	0	0	1.00012209	0	0	0	0	0	0	0	0	0	0	0	0	0	0	0	0	1.00012209	0	0	0	0	0	0	0	0	0	0	0	0	0	0
ENSDARG00000003380	0	0	0	1.00012209	0	0	0	0	0	1.00012209	0	0	0	0	0	0	0	1.00012209	0	0	0	0	0	0	2.00048844	0	0	0	0	0	0	0	1.00012209	0	0	0	1.00012209	0	0	0	0	0	0	0	0	0	2.00048844	0	0
ENSDARG00000003382	0	0	0	0	0	0	0	1.00012209	0	2.00048844	0	0	0	0	0	0	0	0	1.00012209	0	0	0	0	0	1.00012209	0	0	0	0	0	0	0	0	0	0	0	0	0	0	0	0	0	0	0	0	0	0	0	0
ENSDARG00000003383	0	0	0	0	0	0	0	0	0	0	0	2.00048844	0	0	0	0	0	0	0	0	0	0	0	0	0	0	0	0	0	0	0	0	0	0	0	0	0	0	0	0	0	0	0	0	0	0	0	0	0
ENSDARG00000003384	0	0	0	0	0	0	1.00012209	1.00012209	0	2.00048844	0	0	0	0	1.00012209	0	0	0	0	0	0	0	1.00012209	0	0	0	0	0	0	0	0	3.00109917	0	0	0	0	0	0	0	0	0	0	0	0	0	0	0	0	0
ENSDARG00000003391	0	0	0	0	0	0	0	0	0	0	0	0	0	0	0	0	0	1.00012209	0	0	0	0	0	0	0	0	0	0	0	0	0	0	0	0	1.00012209	0	1.00012209	0	0	0	0	0	0	0	0	0	0	0	0
ENSDARG00000003397	0	0	0	0	0	0	0	0	0	0	0	0	0	0	0	0	0	0	0	0	0	0	0	0	0	0	0	0	0	0	0	0	0	0	0	0	0	0	0	0	0	0	0	0	0	0	0	0	0
ENSDARG00000003398	1.00012209	1.00012209	0	0	0	0	0	0	0	0	0	0	0	0	0	0	0	0	0	0	0	0	0	0	0	0	0	0	0	0	0	1.00012209	0	0	0	1.00012209	0	0	0	0	0	0	0	0	0	0	2.00048844	0	0
ENSDARG00000003403	0	0	0	0	0	0	0	0	0	0	0	0	0	0	0	0	0	1.00012209	0	0	0	0	0	0	0	0	0	0	0	0	0	1.00012209	0	0	0	0	0	0	0	0	0	0	0	0	0	0	0	0	0
ENSDARG00000003411	0	0	0	0	0	0	0	0	0	0	0	0	0	0	0	0	0	0	0	0	0	0	0	0	0	0	0	0	0	0	0	0	0	0	0	0	0	0	0	0	0	0	0	0	0	0	0	0	0
ENSDARG00000003420	0	0	0	0	0	0	0	0	0	0	0	0	0	0	0	0	0	0	0	0	0	0	0	0	0	0	0	0	0	0	0	0	0	0	0	0	0	0	0	0	0	0	0	0	0	0	0	0	0
ENSDARG00000003421	2.00048844	0	0	0	0	0	0	0	0	0	0	0	0	0	0	0	1.00012209	0	0	0	0	0	4.001954397	0	0	0	0	0	0	0	0	0	0	0	0	0	0	0	0	0	0	0	0	0	0	0	4.001954397	0	0
ENSDARG00000003429	1.00012209	0	0	0	0	0	2.00048844	3.00109917	0	6.004398828	0	6.004398828	0	0	0	0	0	6.004398828	5.003054244	0	0	1.00012209	3.00109917	0	0	0	0	0	0	0	0	2.00048844	0	0	2.00048844	0	1.00012209	0	0	1.00012209	0	0	0	0	0	0	4.001954397	0	0
ENSDARG00000003444	0	0	0	0	0	0	0	0	0	2.00048844	0	1.00012209	0	0	0	0	0	1.00012209	0	0	0	0	0	0	0	0	0	0	0	1.00012209	0	0	0	0	0	0	0	0	0	0	0	0	0	0	0	0	0	0	0
ENSDARG00000003446	0	0	0	0	0	0	0	0	0	0	0	0	0	0	0	0	0	0	0	0	0	0	0	0	0	0	0	0	0	0	0	0	0	0	0	0	0	0	0	0	0	0	0	0	0	0	0	0	0
ENSDARG00000003449	0	0	0	0	0	0	0	0	0	0	0	0	0	0	0	0	0	0	0	0	0	0	0	0	0	0	0	0	0	0	0	0	0	0	0	0	0	0	0	0	0	0	0	0	0	0	0	0	0
ENSDARG00000003462	0	0	0	0	0	0	0	0	1.00012209	0	0	0	0	0	0	0	0	0	0	0	0	0	0	0	0	0	0	0	0	0	0	0	0	0	0	0	0	0	0	0	0	0	0	0	0	0	0	0	0
ENSDARG00000003470	0	0	0	0	0	0	0	1.00012209	0	1.00012209	0	0	0	0	0	0	0	1.00012209	0	0	0	1.00012209	0	0	0	0	0	0	0	0	0	0	0	0	0	0	0	0	0	0	0	0	0	1.00012209	0	0	0	0	0
ENSDARG00000003486	1.00012209	1.00012209	0	0	0	0	0	2.00048844	0	0	0	0	0	0	0	0	0	1.00012209	2.00048844	0	0	0	2.00048844	0	0	0	0	0	0	0	0	0	1.00012209	0	1.00012209	0	1.00012209	0	0	0	0	0	0	0	0	0	4.001954397	0	0
ENSDARG00000003487	0	0	0	0	0	0	0	0	0	0	0	0	0	0	2.00048844	0	0	0	0	0	0	0	4.001954397	0	1.00012209	0	0	0	0	0	0	2.00048844	0	0	0	0	0	0	0	0	0	0	0	0	0	0	1.00012209	0	0
ENSDARG00000003495	0	0	1.00012209	0	0	0	0	0	0	7.005988269	0	0	0	0	0	0	0	2.00048844	0	0	0	0	1.00012209	0	0	0	0	0	0	0	0	0	0	0	0	0	0	0	0	0	0	1.00012209	0	0	0	0	0	0	0
ENSDARG00000003511	0	0	0	0	0	0	0	0	0	0	0	0	0	0	0	0	0	0	0	0	0	0	1.00012209	0	0	0	0	0	0	0	0	0	0	0	1.00012209	0	0	0	0	0	0	0	0	0	0	0	0	0	0
ENSDARG00000003512	0	4.001954397	0	0	0	0	0	0	0	4.001954397	0	1.00012209	0	0	2.00048844	0	0	3.00109917	0	0	0	0	4.001954397	0	0	0	0	0	0	1.00012209	3.00109917	0	2.00048844	0	2.00048844	0	1.00012209	0	0	0	0	1.00012209	0	0	0	0	4.001954397	0	0
ENSDARG00000003513	0	0	0	0	0	0	0	0	0	0	0	0	0	0	0	0	0	0	0	0	0	0	1.00012209	0	0	0	0	0	0	0	1.00012209	1.00012209	0	0	0	0	1.00012209	0	0	2.00048844	0	0	0	0	0	0	0	0	0
ENSDARG00000003517	0	0	0	0	0	0	0	0	0	0	0	0	0	0	0	0	0	0	0	0	0	0	0	0	0	0	0	0	0	0	0	0	0	0	0	0	0	0	0	0	0	0	0	0	0	0	0	0	0
ENSDARG00000003519	0	0	0	0	0	0	0	0	0	0	0	0	0	0	0	0	0	1.00012209	0	0	0	0	0	0	0	0	0	0	0	0	0	0	0	0	0	0	0	0	0	0	0	0	0	0	0	0	0	0	0
ENSDARG00000003520	0	0	0	0	0	0	0	1.00012209	0	0	0	0	0	0	0	0	0	0	0	0	0	0	0	0	0	0	0	0	0	0	0	0	0	0	0	0	0	0	0	0	0	0	0	0	1.00012209	0	0	0	0
ENSDARG00000003526	0	0	0	0	0	0	0	4.001954397	0	0	0	0	0	0	0	0	0	1.00012209	0	0	0	0	0	0	0	0	0	0	0	0	0	2.00048844	1.00012209	0	1.00012209	1.00012209	0	0	0	0	0	0	0	0	0	0	1.00012209	0	0
ENSDARG00000003527	0	0	0	0	0	0	0	0	0	1.00012209	0	0	0	0	0	0	0	0	0	0	0	0	1.00012209	0	0	0	0	0	0	0	0	0	0	0	0	0	0	0	0	0	0	0	0	0	0	0	0	0	0
ENSDARG00000003531	0	0	0	0	0	0	0	1.00012209	0	0	0	1.00012209	0	0	0	0	0	1.00012209	0	0	0	0	0	0	1.00012209	0	0	0	0	0	1.00012209	0	0	0	1.00012209	0	0	0	0	1.00012209	0	0	0	0	0	0	1.00012209	0	0
ENSDARG00000003533	0	0	0	0	0	0	0	0	0	0	0	0	0	0	0	0	0	1.00012209	0	0	0	0	0	0	0	0	0	0	0	0	0	0	0	0	0	0	0	0	0	0	0	0	0	0	0	0	0	0	0
ENSDARG00000003546	0	0	0	0	0	0	0	0	0	0	0	0	0	0	0	0	0	0	0	0	0	0	1.00012209	0	0	0	0	0	0	0	0	0	0	0	0	0	0	0	0	0	0	0	0	0	0	0	1.00012209	0	0
ENSDARG00000003564	0	0	0	0	0	0	0	0	0	4.001954397	0	1.00012209	0	0	0	0	0	2.00048844	0	0	0	0	0	0	0	0	0	0	0	0	0	0	1.00012209	0	1.00012209	0	0	0	0	0	0	0	0	0	0	0	1.00012209	0	0
ENSDARG00000003570	0	0	0	0	0	0	0	0	0	0	0	0	0	0	0	0	0	9.009902203	0	0	0	0	2.00048844	0	0	0	0	0	0	0	0	0	3.00109917	0	0	0	1.00012209	0	0	1.00012209	0	0	0	0	0	0	1.00012209	0	0
ENSDARG00000003573	0	0	0	0	0	0	1.00012209	0	0	0	0	0	0	0	0	0	0	1.00012209	0	0	0	0	0	0	0	0	0	0	0	0	0	0	0	0	0	0	0	0	0	0	0	0	0	0	0	0	0	0	0
ENSDARG00000003576	0	0	0	0	0	0	0	0	0	0	0	0	0	0	0	0	0	0	0	0	0	0	0	0	0	0	0	0	0	0	0	0	0	0	0	0	0	0	0	0	0	0	0	0	0	0	0	0	0
ENSDARG00000003582	0	0	0	0	0	0	0	0	0	0	0	0	0	0	0	0	0	0	0	0	0	0	0	0	0	0	0	0	0	0	0	0	0	0	0	0	0	0	0	0	0	0	0	0	0	0	0	0	0
ENSDARG00000003584	0	1.00012209	0	0	0	0	0	0	0	0	0	0	0	0	0	0	0	0	0	0	0	0	0	0	1.00012209	0	0	0	0	0	0	0	0	0	0	0	0	0	0	2.00048844	0	0	0	0	0	0	2.00048844	0	0
ENSDARG00000003592	0	0	0	0	0	0	0	1.00012209	0	0	0	0	0	0	0	0	0	2.00048844	0	0	0	0	0	0	0	0	0	0	0	0	0	0	0	0	0	0	0	0	0	0	0	0	0	0	0	0	0	0	0
ENSDARG00000003599	0	2.00048844	0	0	0	1.00012209	0	1.00012209	0	12.01761253	0	0	0	1.00012209	1.00012209	0	0	4.001954397	1.00012209	0	0	0	4.001954397	0	1.00012209	0	0	0	0	0	1.00012209	0	2.00048844	0	1.00012209	0	0	0	0	5.003054244	0	2.00048844	0	0	0	0	7.005988269	0	0
ENSDARG00000003607	0	0	0	0	0	0	0	0	0	0	0	0	0	0	0	0	0	0	0	0	0	0	0	0	0	0	0	0	0	0	0	0	0	0	1.00012209	0	0	0	0	0	0	0	0	0	0	0	0	0	0
ENSDARG00000003616	0	0	0	0	0	0	0	2.00048844	0	3.00109917	0	0	0	0	0	0	0	1.00012209	0	0	0	0	0	0	0	0	0	0	0	0	0	2.00048844	0	0	0	0	0	0	0	0	0	0	0	0	0	0	2.00048844	0	0
ENSDARG00000003631	0	0	0	0	0	0	0	0	0	0	0	0	0	0	0	0	0	0	0	0	0	0	0	0	0	0	0	0	0	0	1.00012209	0	0	0	0	0	0	0	0	0	0	0	0	0	0	0	0	0	0
ENSDARG00000003632	0	0	0	0	0	0	0	0	0	0	0	0	0	0	0	0	0	0	0	0	0	0	0	0	2.00048844	0	0	0	0	0	0	0	0	0	0	0	0	0	0	0	0	1.00012209	0	0	0	0	0	0	0
ENSDARG00000003635	0	0	0	0	0	0	0	0	0	0	0	0	0	0	0	0	0	0	0	0	0	0	0	0	0	0	0	0	0	0	0	0	0	0	0	0	0	0	0	0	0	0	0	0	0	0	0	0	0
ENSDARG00000003641	0	0	0	0	0	0	1.00012209	0	0	2.00048844	0	1.00012209	0	0	0	0	0	4.001954397	0	0	0	0	4.001954397	0	2.00048844	0	0	0	0	0	0	1.00012209	1.00012209	0	1.00012209	0	1.00012209	0	0	2.00048844	0	0	0	0	0	0	5.003054244	0	0
ENSDARG00000003642	0	0	0	0	0	0	0	0	0	0	0	0	0	0	0	0	0	0	0	0	0	0	0	0	0	0	0	0	0	0	0	0	0	0	0	0	0	0	0	0	0	0	0	0	0	0	0	0	0
ENSDARG00000003655	0	0	0	0	0	0	0	0	0	0	0	0	0	0	0	0	0	0	0	0	0	0	0	0	0	0	0	0	0	0	0	0	0	0	0	0	0	0	0	0	0	0	0	0	0	0	0	0	0
ENSDARG00000003675	0	0	0	0	0	0	0	0	0	3.00109917	0	0	0	0	1.00012209	0	0	4.001954397	0	0	0	0	0	0	0	0	0	0	0	0	0	0	0	0	0	0	0	0	0	0	0	0	0	0	0	0	0	0	0
ENSDARG00000003680	0	0	0	0	0	0	0	0	0	0	0	1.00012209	0	0	1.00012209	0	0	0	1.00012209	0	0	0	0	0	0	0	0	0	0	0	2.00048844	3.00109917	0	0	1.00012209	0	0	0	0	0	0	0	0	0	0	0	0	0	0
ENSDARG00000003681	1.00012209	0	0	0	1.00012209	0	0	7.005988269	0	3.00109917	0	0	0	0	2.00048844	0	0	10.01222694	1.00012209	0	0	0	5.003054244	0	0	0	0	0	0	0	0	2.00048844	0	0	0	0	0	0	0	0	1.00012209	0	0	0	0	0	2.00048844	0	0
ENSDARG00000003682	0	0	0	0	0	0	0	0	0	1.00012209	0	1.00012209	0	0	0	0	0	3.00109917	0	0	0	0	4.001954397	0	1.00012209	0	0	0	0	0	0	0	0	0	0	1.00012209	0	0	0	0	0	0	0	0	0	0	7.005988269	0	0
ENSDARG00000003684	0	0	0	0	0	0	0	0	0	3.00109917	0	0	1.00012209	0	0	0	0	0	0	0	0	0	0	0	1.00012209	0	0	0	0	0	0	0	0	0	0	0	0	0	0	0	0	0	0	0	0	0	1.00012209	0	0
ENSDARG00000003693	0	0	0	0	0	0	0	0	0	0	0	0	0	0	0	0	0	8.007822687	0	0	0	0	2.00048844	0	0	0	0	0	0	0	1.00012209	0	0	0	0	0	0	0	0	0	0	0	0	0	0	0	1.00012209	0	0
ENSDARG00000003695	2.00048844	0	0	0	0	1.00012209	1.00012209	5.003054244	0	30.11040269	0	0	0	0	3.00109917	0	1.00012209	13.02067364	0	0	0	0	1.00012209	0	6.004398828	1.00012209	1.00012209	0	0	0	0	1.00012209	0	2.00048844	0	1.00012209	2.00048844	0	0	3.00109917	0	0	0	1.00012209	0	1.00012209	9.009902203	0	0
ENSDARG00000003697	0	0	0	0	0	0	0	0	0	1.00012209	0	0	0	0	0	0	0	0	0	0	0	0	0	0	0	0	0	0	0	0	0	0	0	0	0	0	0	0	0	3.00109917	0	0	0	0	0	0	0	0	0
ENSDARG00000003699	2.00048844	0	0	0	0	0	0	0	0	0	0	0	0	0	0	0	0	0	0	0	0	0	0	0	1.00012209	0	0	0	0	0	0	0	0	0	0	0	0	0	0	1.00012209	0	0	0	0	0	0	0	0	0
ENSDARG00000003701	0	0	0	0	0	0	0	0	0	0	0	0	0	0	0	0	0	0	0	0	0	0	0	0	0	0	0	0	0	0	0	0	0	0	0	0	0	0	0	0	0	0	0	0	0	0	0	0	0
ENSDARG00000003705	0	0	0	0	0	0	1.00012209	0	0	7.005988269	0	0	0	0	2.00048844	0	0	0	0	0	0	0	8.007822687	0	2.00048844	0	0	1.00012209	0	0	3.00109917	1.00012209	4.001954397	0	3.00109917	0	2.00048844	0	0	0	0	2.00048844	0	0	0	0	13.02067364	0	0
ENSDARG00000003706	0	1.00012209	0	0	0	0	0	1.00012209	0	39.18685599	0	0	0	0	0	1.00012209	0	0	0	0	0	1.00012209	0	0	1.00012209	0	0	0	0	4.001954397	0	0	0	0	0	1.00012209	0	0	0	0	0	0	0	0	0	0	1.00012209	0	0
ENSDARG00000003749	0	0	0	0	0	0	0	1.00012209	0	0	0	0	0	0	0	0	0	0	0	0	0	0	0	0	0	0	0	0	0	0	0	0	0	0	0	0	0	0	0	0	0	0	0	0	0	0	0	0	0
ENSDARG00000003750	0	0	0	0	0	0	0	0	0	0	0	0	0	0	0	0	0	0	0	0	0	0	0	0	0	0	0	0	0	0	0	0	0	0	0	0	0	0	0	0	0	0	0	0	0	0	0	0	0
ENSDARG00000003751	0	0	0	0	0	0	0	0	0	0	0	0	0	0	0	0	0	0	0	0	0	0	2.00048844	0	0	0	0	0	0	0	0	0	0	0	0	0	0	0	0	0	0	0	0	0	0	0	2.00048844	0	0
ENSDARG00000003754	0	0	0	0	0	0	0	0	0	0	0	0	0	0	0	0	0	0	0	0	0	0	0	0	0	0	0	0	0	0	0	0	0	0	0	0	0	0	0	0	0	0	0	0	0	0	0	0	0
ENSDARG00000003757	0	0	0	0	0	0	0	1.00012209	0	0	0	0	0	0	0	0	0	0	0	0	0	0	1.00012209	0	0	0	0	0	0	0	0	0	0	0	0	0	0	0	0	0	0	0	0	0	0	0	1.00012209	0	0
ENSDARG00000003769	0	0	0	0	0	0	0	0	0	0	0	0	0	0	0	0	0	0	0	0	0	0	0	0	0	0	0	0	0	0	0	0	0	0	0	0	0	0	0	0	0	0	0	0	0	0	0	0	0
ENSDARG00000003776	0	0	0	0	0	0	0	2.00048844	0	1.00012209	0	0	0	0	0	0	0	1.00012209	0	0	0	0	0	0	0	0	0	0	0	0	2.00048844	0	0	0	0	0	0	0	0	6.004398828	0	0	0	0	0	0	2.00048844	0	0
ENSDARG00000003779	0	0	0	0	0	0	0	0	0	1.00012209	0	0	0	0	0	0	0	0	0	0	0	0	0	0	0	0	0	0	0	0	0	0	0	0	0	0	0	0	0	0	0	0	0	0	0	0	0	0	0
ENSDARG00000003783	0	0	0	0	0	0	0	0	0	0	0	0	0	0	1.00012209	0	0	2.00048844	3.00109917	0	0	0	1.00012209	0	0	0	0	0	0	0	0	1.00012209	0	0	3.00109917	0	0	0	0	0	0	0	0	0	0	0	3.00109917	0	0
ENSDARG00000003789	0	0	0	0	0	0	0	0	0	3.00109917	0	0	0	0	0	0	0	0	0	0	0	0	0	0	0	0	0	0	0	0	1.00012209	2.00048844	0	0	0	0	0	0	0	0	0	0	0	0	0	0	4.001954397	0	0
ENSDARG00000003795	1.00012209	0	2.00048844	0	0	11.01479701	0	4.001954397	2.00048844	215.5746787	0	2.00048844	4.001954397	0	2.00048844	0	0	16.03133162	1.00012209	0	0	4.001954397	3.00109917	1.00012209	13.02067364	0	2.00048844	0	0	1.00012209	2.00048844	1.00012209	0	4.001954397	5.003054244	5.003054244	0	0	0	1.00012209	1.00012209	1.00012209	0	1.00012209	0	1.00012209	8.007822687	0	0
ENSDARG00000003797	0	0	0	0	0	0	0	0	0	1.00012209	0	0	0	0	0	0	0	0	0	0	0	0	0	0	0	0	0	0	0	0	0	0	0	0	0	0	0	0	0	0	0	0	0	0	0	0	0	0	0
ENSDARG00000003803	0	0	0	0	0	0	0	0	0	0	0	0	0	0	0	0	0	0	0	0	0	0	0	0	0	0	0	0	0	0	0	0	0	0	0	0	0	0	0	0	0	0	0	0	0	0	0	0	0
ENSDARG00000003811	0	0	0	0	0	0	0	0	0	5.003054244	0	0	0	0	0	0	0	3.00109917	0	0	0	0	0	0	0	0	0	0	0	2.00048844	1.00012209	0	0	0	1.00012209	0	0	0	0	1.00012209	0	0	0	0	0	0	0	0	0
ENSDARG00000003813	0	0	0	0	0	0	0	1.00012209	0	1.00012209	0	0	1.00012209	0	0	0	0	7.005988269	1.00012209	0	0	0	3.00109917	0	0	0	0	0	0	0	1.00012209	0	0	0	0	0	0	0	0	0	0	0	0	0	0	0	6.004398828	2.00048844	0
ENSDARG00000003818	0	0	0	0	0	0	0	0	0	0	0	0	0	0	0	0	0	0	0	0	0	0	0	0	0	0	0	0	0	0	1.00012209	0	0	0	0	0	0	0	0	0	0	0	0	0	0	0	0	0	0
ENSDARG00000003820	1.00012209	0	0	0	0	0	1.00012209	0	0	4.001954397	0	1.00012209	0	1.00012209	2.00048844	0	0	4.001954397	6.004398828	0	0	0	2.00048844	0	2.00048844	0	0	0	0	0	4.001954397	3.00109917	5.003054244	1.00012209	2.00048844	0	0	0	0	11.01479701	0	0	0	0	0	0	7.005988269	1.00012209	0
ENSDARG00000003822	0	0	0	0	0	0	0	0	0	0	0	0	0	0	0	0	0	0	0	0	0	0	0	0	0	0	0	0	0	0	0	0	0	0	0	0	0	0	0	0	0	0	0	0	0	0	0	0	0
ENSDARG00000003827	0	0	0	0	0	0	0	0	0	0	0	0	0	0	0	0	0	0	0	0	0	0	0	0	0	0	0	0	0	0	0	0	0	0	0	0	0	0	0	0	0	0	0	0	0	0	0	0	0
ENSDARG00000003829	0	0	0	0	0	0	0	1.00012209	0	0	0	0	0	0	0	0	0	5.003054244	2.00048844	0	0	0	0	0	0	0	0	0	0	0	2.00048844	0	0	0	2.00048844	0	0	0	0	0	0	0	0	0	0	0	0	0	0
ENSDARG00000003835	0	0	0	0	0	0	0	0	0	1.00012209	0	0	0	0	0	0	0	3.00109917	0	0	0	0	0	0	1.00012209	0	0	0	0	0	2.00048844	0	0	0	1.00012209	0	0	0	0	0	0	0	0	0	0	0	0	0	0
ENSDARG00000003836	0	0	0	0	0	0	0	0	0	1.00012209	0	0	0	0	0	0	0	3.00109917	0	0	0	0	2.00048844	0	0	0	0	0	0	0	0	1.00012209	0	0	3.00109917	0	0	0	0	0	0	0	0	0	0	0	1.00012209	0	0
ENSDARG00000003841	0	0	0	0	0	0	0	1.00012209	0	0	0	0	0	0	0	0	0	0	0	0	0	0	0	0	0	0	0	0	0	0	0	1.00012209	0	0	0	0	0	0	0	0	0	0	0	0	0	0	0	0	0
ENSDARG00000003845	1.00012209	0	0	0	0	0	0	1.00012209	0	0	0	0	0	0	0	0	0	2.00048844	0	0	0	0	0	0	0	0	0	0	0	0	1.00012209	0	0	0	0	0	0	0	0	0	0	0	0	0	0	0	0	0	0
ENSDARG00000003846	0	0	0	0	0	0	0	0	0	0	0	0	0	0	0	0	0	0	1.00012209	0	0	0	0	0	0	0	0	0	0	0	0	0	1.00012209	0	0	0	0	0	0	0	0	0	0	1.00012209	0	0	0	0	0
ENSDARG00000003854	0	0	0	0	0	0	0	0	0	11.01479701	0	0	0	0	0	0	0	0	0	0	0	0	0	0	0	0	0	0	0	0	0	0	0	0	0	0	1.00012209	0	0	0	0	0	0	0	0	0	0	0	0
ENSDARG00000003860	0	0	0	0	0	0	0	0	0	0	0	0	0	0	0	0	0	0	0	0	0	0	1.00012209	0	0	0	0	0	0	0	0	0	0	0	0	0	0	0	0	0	0	0	0	0	0	0	0	0	0
ENSDARG00000003865	0	0	0	0	0	0	0	0	0	0	0	0	0	0	0	0	0	1.00012209	0	0	0	0	0	0	0	0	0	0	0	0	0	0	0	0	1.00012209	0	0	0	0	0	0	0	0	0	0	0	1.00012209	0	0
ENSDARG00000003866	2.00048844	0	0	0	0	0	1.00012209	3.00109917	0	1.00012209	0	0	0	0	1.00012209	0	0	6.004398828	0	0	0	0	1.00012209	0	1.00012209	0	0	0	0	0	1.00012209	2.00048844	2.00048844	0	0	0	1.00012209	0	0	0	0	0	0	0	0	0	6.004398828	0	0
ENSDARG00000003869	0	0	0	0	0	0	0	1.00012209	0	1.00012209	0	1.00012209	0	0	0	0	0	0	0	0	0	0	0	0	0	0	0	0	0	0	0	0	0	0	0	0	0	0	0	0	0	0	0	0	0	0	0	0	0
ENSDARG00000003872	0	1.00012209	0	0	0	0	0	0	0	0	0	0	0	0	0	0	0	0	0	0	0	0	0	0	0	0	0	0	0	0	0	1.00012209	0	0	0	0	0	0	0	0	0	0	0	0	0	0	0	0	0
ENSDARG00000003877	0	0	0	0	0	0	0	0	0	0	0	0	0	0	0	0	0	1.00012209	0	0	0	0	0	0	0	0	0	0	0	0	0	0	0	0	0	0	0	0	0	0	0	0	0	0	0	0	0	0	0
ENSDARG00000003882	0	0	0	0	0	0	0	0	0	0	0	0	0	0	0	0	0	0	0	0	0	0	0	0	0	0	0	0	0	0	0	0	2.00048844	0	0	0	0	0	0	0	0	0	0	0	0	0	0	0	0
ENSDARG00000003899	0	0	0	0	0	0	0	0	0	0	0	0	0	0	0	0	0	0	0	0	0	0	0	0	0	0	0	0	0	0	0	0	0	0	0	0	0	0	0	0	0	0	0	0	0	0	0	0	0
ENSDARG00000003900	0	0	0	0	0	0	0	0	0	0	0	0	0	0	0	0	0	0	0	0	0	0	0	0	0	0	0	0	0	0	0	0	0	0	0	0	0	0	0	0	0	0	0	0	0	0	0	0	0
ENSDARG00000003902	1.00012209	0	0	0	0	0	0	0	0	0	0	0	0	0	0	0	0	0	0	0	0	0	0	0	0	0	0	0	0	0	0	0	0	0	0	0	0	0	0	0	0	0	0	0	0	0	0	0	0
ENSDARG00000003910	0	0	0	0	0	0	0	0	0	0	0	0	0	0	2.00048844	0	0	0	2.00048844	0	0	0	0	0	0	0	0	0	0	0	1.00012209	2.00048844	0	0	1.00012209	0	0	0	0	0	0	0	0	0	0	0	1.00012209	0	0
ENSDARG00000003920	0	0	0	0	0	0	0	0	0	1.00012209	0	0	0	1.00012209	0	1.00012209	0	7.005988269	0	0	0	1.00012209	3.00109917	0	0	0	0	0	0	2.00048844	4.001954397	1.00012209	0	0	1.00012209	0	1.00012209	0	0	7.005988269	0	0	0	0	0	0	6.004398828	0	0
ENSDARG00000003925	0	0	0	0	0	0	0	0	0	0	0	0	0	0	0	0	0	0	0	0	0	0	0	0	1.00012209	0	0	0	0	0	0	0	0	0	0	0	0	0	0	0	0	0	0	0	0	0	0	0	0
ENSDARG00000003927	0	0	0	0	0	0	0	1.00012209	0	0	0	0	0	0	1.00012209	0	0	0	0	0	0	0	0	0	0	0	0	0	0	0	1.00012209	0	0	0	0	0	0	0	0	0	0	0	0	0	0	0	2.00048844	0	0
ENSDARG00000003931	9.009902203	0	0	0	0	0	0	12.01761253	0	0	0	0	0	0	0	0	0	2.00048844	0	0	0	0	0	0	0	0	0	0	0	0	1.00012209	0	0	0	0	0	0	0	0	1.00012209	0	0	1.00012209	0	0	0	0	0	0
ENSDARG00000003933	6.004398828	4.001954397	1.00012209	1.00012209	1.00012209	1.00012209	3.00109917	19.04420413	1.00012209	29.10314829	0	4.001954397	2.00048844	0	4.001954397	0	0	30.11040269	8.007822687	0	0	2.00048844	27.08938227	0	10.01222694	0	0	0	0	0	6.004398828	9.009902203	3.00109917	1.00012209	9.009902203	0	3.00109917	0	0	0	1.00012209	8.007822687	0	3.00109917	0	0	142.4485334	0	0
ENSDARG00000003934	0	0	0	0	0	0	0	0	0	1.00012209	0	0	0	0	0	0	0	0	0	0	0	0	0	0	0	0	0	0	0	0	0	0	1.00012209	0	0	0	0	0	0	0	0	0	0	0	0	0	0	0	0
ENSDARG00000003938	0	0	0	0	0	0	0	0	0	1.00012209	0	0	0	0	0	0	0	0	0	0	0	0	0	0	0	0	0	0	0	0	0	0	0	0	0	0	0	0	0	0	0	0	0	0	0	0	3.00109917	0	0
ENSDARG00000003940	0	0	1.00012209	0	0	0	0	1.00012209	0	2.00048844	1.00012209	0	0	0	0	0	0	1.00012209	0	0	0	0	0	0	0	0	0	0	0	0	0	0	0	0	0	0	0	0	0	0	0	0	0	0	0	0	0	0	0
ENSDARG00000003941	0	0	0	0	0	0	0	0	0	0	0	0	0	0	0	0	0	1.00012209	0	0	0	0	1.00012209	0	0	0	0	0	0	0	0	0	1.00012209	0	0	0	0	0	0	1.00012209	0	0	0	0	0	0	0	0	0
ENSDARG00000003952	1.00012209	3.00109917	1.00012209	1.00012209	0	0	1.00012209	17.03537624	0	5.003054244	0	2.00048844	1.00012209	0	0	1.00012209	1.00012209	25.07660581	13.02067364	0	0	0	8.007822687	0	2.00048844	0	0	0	0	0	6.004398828	2.00048844	2.00048844	0	3.00109917	0	3.00109917	0	1.00012209	3.00109917	0	1.00012209	0	0	0	0	42.21681544	0	0
ENSDARG00000003961	0	0	0	0	0	0	0	0	0	0	0	0	0	0	0	0	0	2.00048844	0	0	0	0	0	0	0	0	0	0	0	0	0	0	0	0	0	0	0	0	0	0	0	0	0	0	0	0	0	0	0
ENSDARG00000003963	0	2.00048844	0	0	0	0	0	0	0	0	0	0	0	0	0	0	0	2.00048844	0	0	0	0	0	0	0	0	0	0	0	0	0	0	1.00012209	0	0	0	0	0	0	1.00012209	0	0	0	0	0	0	0	0	0
ENSDARG00000003969	0	0	0	0	0	0	0	0	0	0	0	0	0	0	1.00012209	0	0	0	0	0	0	0	0	0	0	0	0	0	0	0	0	0	0	0	0	1.00012209	0	0	0	2.00048844	0	0	0	0	0	0	0	0	0
ENSDARG00000003973	0	0	0	0	0	0	0	0	0	1.00012209	0	0	0	0	0	0	0	0	0	0	0	0	0	0	0	0	0	0	0	0	0	0	0	0	0	0	0	0	0	0	0	2.00048844	0	0	0	0	1.00012209	0	0
ENSDARG00000003974	0	0	0	0	0	0	0	0	0	0	0	0	0	0	2.00048844	0	0	0	1.00012209	0	0	0	0	0	0	0	0	0	0	0	1.00012209	1.00012209	0	0	0	0	0	0	0	0	0	0	0	0	0	0	0	0	0
ENSDARG00000003977	0	0	0	0	0	0	0	0	0	1.00012209	0	0	0	0	0	0	0	0	0	0	0	0	0	0	0	0	0	0	0	0	0	0	0	0	0	0	0	0	0	0	0	0	0	0	0	0	0	0	0
ENSDARG00000003984	0	0	0	0	0	0	0	0	0	0	0	0	0	0	0	0	0	0	0	0	0	0	0	0	0	1.00012209	0	0	0	0	0	0	0	0	0	0	0	0	0	0	0	0	0	0	0	0	0	0	0
ENSDARG00000003989	0	0	0	0	0	0	0	0	0	0	0	0	0	0	0	0	0	0	0	0	0	0	0	0	0	0	0	0	0	0	0	0	0	0	0	0	0	0	0	0	0	0	0	0	0	0	0	0	0
ENSDARG00000003991	0	0	0	0	0	0	0	0	0	3.00109917	0	0	0	0	0	0	0	0	0	0	0	0	0	0	0	0	0	0	0	0	0	0	0	0	0	0	0	0	0	0	0	0	0	0	0	0	0	0	0
ENSDARG00000003998	1.00012209	0	0	0	0	0	0	0	0	0	0	0	0	0	0	0	0	0	0	0	0	0	0	0	0	0	0	0	0	0	0	0	0	0	0	0	0	0	0	0	0	0	0	0	0	0	0	0	0
ENSDARG00000004017	0	0	0	0	0	0	0	0	0	0	0	0	0	0	0	0	0	1.00012209	0	0	0	0	0	0	0	0	0	0	0	0	0	0	0	0	0	0	0	0	0	0	0	0	0	0	0	0	0	0	0
ENSDARG00000004018	2.00048844	0	0	0	0	0	0	2.00048844	0	0	0	0	0	0	0	0	0	2.00048844	0	0	0	0	0	0	0	0	0	0	0	0	0	0	0	0	0	0	0	0	0	0	0	0	0	0	0	0	0	0	0
ENSDARG00000004034	1.00012209	0	0	0	0	0	0	1.00012209	0	0	0	0	0	0	0	0	0	2.00048844	1.00012209	0	0	0	2.00048844	0	0	0	0	0	0	0	1.00012209	0	1.00012209	0	0	1.00012209	1.00012209	0	0	0	0	0	0	0	0	0	0	0	0
ENSDARG00000004037	0	0	0	0	0	0	0	2.00048844	0	0	0	0	0	0	0	0	0	2.00048844	0	0	0	0	0	0	0	0	0	0	0	0	1.00012209	0	0	0	0	0	0	0	0	1.00012209	0	0	0	0	0	0	0	0	0
ENSDARG00000004046	0	0	0	0	0	0	0	0	0	0	0	0	0	0	0	0	0	0	0	0	0	0	0	0	0	0	0	0	0	0	0	0	0	0	0	0	0	0	0	0	0	0	0	0	0	0	0	0	0
ENSDARG00000004051	0	0	0	0	0	0	0	0	0	0	0	0	0	0	0	0	0	0	0	0	0	0	0	0	0	0	0	0	0	0	0	0	0	0	0	0	0	0	0	0	0	0	0	0	0	0	0	0	0
ENSDARG00000004055	0	0	0	0	0	0	0	0	0	1.00012209	0	0	0	0	0	0	0	1.00012209	0	0	0	0	0	0	0	0	0	0	0	0	0	0	0	0	0	0	0	0	0	0	0	0	0	0	0	0	0	0	0
ENSDARG00000004059	0	0	0	0	0	0	0	0	0	0	0	0	0	0	0	0	0	0	0	0	0	0	0	0	0	0	0	0	0	0	0	0	0	0	0	0	0	0	0	0	0	0	0	0	0	0	0	0	0
ENSDARG00000004060	6.004398828	0	0	0	0	0	0	2.00048844	0	1.00012209	0	1.00012209	0	1.00012209	0	0	0	1.00012209	1.00012209	0	0	0	1.00012209	0	0	0	0	0	0	0	2.00048844	2.00048844	1.00012209	0	1.00012209	0	1.00012209	0	0	0	0	0	0	0	0	0	2.00048844	0	0
ENSDARG00000004074	0	0	0	0	0	0	0	0	0	1.00012209	0	0	0	0	0	0	0	0	0	0	0	1.00012209	0	0	0	0	0	0	0	0	1.00012209	0	0	0	0	1.00012209	0	0	0	0	0	0	0	0	0	0	2.00048844	0	0
ENSDARG00000004078	0	0	0	0	0	0	0	4.001954397	0	6.004398828	0	2.00048844	0	0	0	0	0	2.00048844	1.00012209	0	0	0	6.004398828	0	0	0	0	0	0	0	0	0	0	0	1.00012209	0	1.00012209	0	0	4.001954397	0	0	0	0	0	0	6.004398828	0	1.00012209
ENSDARG00000004094	0	1.00012209	0	0	0	0	0	0	0	0	0	2.00048844	0	0	0	0	0	4.001954397	0	0	0	0	5.003054244	0	0	0	0	0	0	0	6.004398828	2.00048844	2.00048844	0	2.00048844	0	0	0	0	0	0	0	0	0	0	0	3.00109917	0	0
ENSDARG00000004105	2.00048844	0	0	0	0	0	1.00012209	0	0	0	0	1.00012209	1.00012209	0	2.00048844	0	0	0	2.00048844	0	0	0	0	0	0	0	0	0	0	0	0	7.005988269	0	0	2.00048844	0	0	0	0	0	0	0	0	1.00012209	0	0	9.009902203	0	0
ENSDARG00000004111	0	0	0	0	0	0	0	0	0	0	0	0	0	0	1.00012209	0	0	0	0	0	0	0	0	0	0	0	0	0	0	0	0	0	1.00012209	0	0	0	0	0	0	0	0	0	0	0	0	0	1.00012209	0	0
ENSDARG00000004114	0	0	0	0	0	0	0	0	0	0	0	0	0	0	0	0	0	0	0	0	0	0	0	0	0	0	0	0	0	0	0	0	0	0	0	0	0	0	0	0	0	0	0	0	0	0	0	0	0
ENSDARG00000004115	0	0	0	0	0	0	0	0	0	0	0	0	0	0	0	0	0	0	0	0	0	0	0	0	0	0	0	0	0	0	0	0	0	0	0	0	0	0	0	0	0	0	0	0	0	0	0	0	0
ENSDARG00000004130	0	0	0	0	0	0	0	0	0	0	0	0	0	0	0	0	0	0	0	0	0	0	0	0	0	0	0	0	0	0	0	0	0	0	0	0	0	0	0	0	0	0	0	0	0	0	0	0	0
ENSDARG00000004131	0	0	0	0	0	0	0	0	0	0	0	0	0	0	0	0	0	0	0	0	0	0	0	0	0	0	0	0	0	0	0	0	0	0	0	0	0	0	0	0	0	0	0	0	0	0	1.00012209	0	0
ENSDARG00000004132	0	0	0	0	0	0	0	0	0	1.00012209	0	0	0	0	0	0	0	0	0	0	0	0	1.00012209	0	0	0	0	0	0	0	0	0	0	0	0	0	0	0	0	0	0	0	0	0	0	0	1.00012209	0	0
ENSDARG00000004141	0	0	0	0	0	0	0	0	0	0	0	0	0	0	0	0	0	3.00109917	0	0	0	0	0	0	0	0	0	0	0	0	0	0	0	0	0	0	0	0	0	0	0	0	0	0	0	0	0	0	0
ENSDARG00000004148	0	0	0	0	0	0	0	0	0	0	0	0	0	0	0	0	0	5.003054244	0	0	0	0	0	0	0	0	0	0	0	0	0	0	0	0	0	0	0	0	0	1.00012209	0	0	0	0	0	0	0	0	0
ENSDARG00000004151	0	0	0	0	0	0	0	0	0	1.00012209	0	0	0	0	0	0	0	4.001954397	0	0	0	0	0	0	1.00012209	0	0	0	0	0	1.00012209	1.00012209	0	0	1.00012209	0	0	0	0	0	0	0	0	0	0	0	2.00048844	0	0
ENSDARG00000004154	0	0	0	0	0	0	0	0	0	0	0	0	0	0	0	0	0	0	0	0	0	0	0	0	0	0	0	0	0	0	1.00012209	0	0	0	0	0	0	0	0	0	0	0	0	0	0	0	0	0	0
ENSDARG00000004160	0	0	0	0	0	0	0	0	0	1.00012209	0	0	0	0	0	0	0	4.001954397	0	0	0	0	0	0	0	0	0	0	0	0	0	0	1.00012209	0	2.00048844	0	0	0	0	0	0	0	0	0	0	0	6.004398828	0	0
ENSDARG00000004161	0	0	0	0	0	0	0	0	0	0	0	0	0	0	0	0	0	2.00048844	0	0	0	0	2.00048844	0	0	0	0	0	0	0	0	0	0	0	0	0	0	0	0	0	0	0	0	0	0	0	4.001954397	0	0
ENSDARG00000004167	0	0	0	0	0	0	0	0	0	1.00012209	0	0	0	0	0	0	0	2.00048844	0	0	0	0	0	0	0	0	0	0	0	0	0	0	0	0	0	0	0	0	0	0	0	0	0	0	0	0	0	0	0
ENSDARG00000004169	0	0	0	0	0	0	0	0	0	0	0	0	0	0	0	0	0	0	0	0	0	0	0	0	0	0	0	0	0	0	0	0	0	0	0	0	0	0	0	0	0	0	0	0	0	0	0	0	0
ENSDARG00000004171	0	0	0	0	0	0	0	6.004398828	0	0	0	0	0	0	0	0	0	2.00048844	0	0	0	0	1.00012209	0	0	0	0	0	0	0	0	0	0	0	0	0	0	0	0	0	0	0	0	0	0	0	2.00048844	0	0
ENSDARG00000004173	0	0	0	0	0	0	0	2.00048844	0	2.00048844	0	0	0	0	0	0	0	9.009902203	0	0	0	0	0	0	0	0	0	0	0	0	1.00012209	0	0	0	0	0	0	0	0	0	0	1.00012209	0	0	0	0	2.00048844	0	0
ENSDARG00000004174	0	0	0	0	0	0	0	0	0	3.00109917	0	0	0	0	0	0	0	4.001954397	0	0	0	0	0	0	1.00012209	0	0	0	0	0	0	2.00048844	0	1.00012209	1.00012209	0	3.00109917	0	0	1.00012209	0	0	0	0	0	0	4.001954397	0	0
ENSDARG00000004176	0	0	0	0	0	0	0	0	0	0	0	0	0	0	0	0	0	0	0	0	0	1.00012209	0	0	0	0	0	0	0	0	0	0	0	0	0	0	0	0	0	0	0	0	0	0	0	0	0	0	0
ENSDARG00000004177	0	0	0	0	0	0	0	0	0	0	0	0	0	0	0	0	0	0	0	0	0	0	0	0	0	0	0	0	0	0	0	0	0	0	0	0	0	0	0	0	0	0	0	0	0	0	0	0	0
ENSDARG00000004184	0	0	0	0	0	1.00012209	0	0	0	0	0	0	0	0	0	0	0	0	0	0	0	0	0	0	0	0	0	0	0	0	0	0	0	0	0	0	0	0	0	0	0	0	0	0	0	0	0	0	0
ENSDARG00000004187	0	0	0	0	0	0	0	0	0	6.004398828	0	0	1.00012209	0	0	0	0	0	0	0	0	0	0	0	1.00012209	0	0	0	0	0	0	1.00012209	0	2.00048844	0	0	0	0	0	0	0	0	0	0	0	0	0	0	0
ENSDARG00000004189	0	0	0	0	0	0	0	0	0	2.00048844	0	0	0	0	0	0	0	0	0	0	0	0	0	0	0	0	0	0	0	0	0	0	0	0	0	0	0	0	0	0	0	0	0	0	0	0	2.00048844	0	0
ENSDARG00000004196	0	0	0	0	0	0	0	0	0	0	0	0	0	0	0	0	0	7.005988269	0	0	0	0	0	0	0	0	0	0	0	0	0	0	0	0	0	0	0	0	0	2.00048844	0	0	0	0	0	0	0	0	0
ENSDARG00000004199	0	0	0	0	0	0	0	0	0	0	0	1.00012209	0	0	0	0	0	0	0	0	0	0	0	0	0	0	0	0	0	0	0	0	0	0	0	0	0	0	0	0	0	0	0	0	0	0	0	0	0
ENSDARG00000004211	0	0	0	0	0	0	0	0	0	1.00012209	0	0	0	0	1.00012209	0	1.00012209	0	0	0	0	0	0	0	0	0	0	0	0	0	0	0	0	1.00012209	0	0	0	0	0	0	0	0	0	0	0	0	0	0	0
ENSDARG00000004218	0	0	0	0	0	0	0	0	0	0	0	0	0	0	0	0	0	1.00012209	0	0	0	0	0	0	0	0	0	0	0	0	0	0	0	0	0	0	0	0	0	0	0	0	0	0	0	0	0	0	0
ENSDARG00000004221	0	0	0	0	0	0	0	0	0	0	0	0	0	0	0	0	0	0	0	0	0	0	0	0	0	0	0	0	0	0	0	0	0	0	0	0	0	0	0	0	0	0	0	0	0	0	0	0	0
ENSDARG00000004227	0	0	0	0	0	0	0	0	0	0	0	0	0	0	0	0	0	1.00012209	0	0	0	0	0	0	0	0	0	0	0	0	0	0	0	0	0	0	0	0	0	0	0	0	0	0	0	0	0	0	0
ENSDARG00000004243	0	0	0	0	0	0	0	0	0	0	0	0	0	0	0	0	0	2.00048844	0	0	0	0	0	0	0	0	0	0	0	0	0	0	0	0	0	0	0	0	0	0	0	0	0	0	0	0	1.00012209	0	0
ENSDARG00000004246	0	0	1.00012209	0	1.00012209	0	0	0	0	4.001954397	0	0	0	0	8.007822687	0	0	0	3.00109917	0	0	0	14.02398044	0	0	0	0	0	0	0	2.00048844	5.003054244	1.00012209	0	1.00012209	0	1.00012209	0	0	0	0	2.00048844	0	0	0	0	7.005988269	0	0
ENSDARG00000004251	0	0	0	0	0	0	0	0	0	0	0	0	0	0	0	0	0	0	0	0	0	0	0	0	0	0	0	0	0	0	0	0	0	0	0	0	0	0	0	0	0	0	0	0	0	0	0	0	0
ENSDARG00000004256	0	0	0	0	0	0	0	0	0	0	0	0	0	0	0	0	0	0	0	0	0	0	0	0	0	0	0	0	0	0	0	0	0	0	0	0	0	0	0	0	0	0	0	0	0	0	0	0	0
ENSDARG00000004261	0	0	0	0	0	0	0	7.005988269	0	2.00048844	0	0	0	0	0	0	0	9.009902203	0	0	0	0	1.00012209	0	0	0	0	0	0	1.00012209	2.00048844	0	0	0	1.00012209	0	0	0	0	0	0	0	0	0	0	0	14.02398044	0	0
ENSDARG00000004262	0	0	0	0	0	0	0	1.00012209	0	3.00109917	0	0	0	0	1.00012209	0	0	0	0	0	0	0	0	0	0	0	0	0	0	0	0	0	0	0	0	0	0	0	0	0	0	0	0	0	0	0	0	0	0
ENSDARG00000004265	0	0	0	0	0	0	0	0	0	0	0	0	0	0	2.00048844	0	0	2.00048844	0	0	0	0	1.00012209	0	0	0	0	0	0	0	0	0	0	0	0	0	0	0	0	0	0	0	0	0	0	0	0	0	0
ENSDARG00000004270	0	0	0	2.00048844	0	0	0	4.001954397	0	1.00012209	0	0	0	0	0	0	0	4.001954397	1.00012209	0	0	0	1.00012209	0	0	0	0	0	0	0	2.00048844	0	2.00048844	0	0	0	2.00048844	0	0	1.00012209	0	0	0	0	0	0	4.001954397	0	0
ENSDARG00000004274	0	0	0	0	0	0	0	0	0	0	0	0	0	0	0	0	0	0	0	0	0	0	0	0	0	0	0	0	0	0	0	0	0	0	0	0	0	0	0	0	0	0	0	0	0	0	0	0	0
ENSDARG00000004280	2.00048844	0	0	0	0	0	0	0	0	0	0	0	0	0	0	0	0	1.00012209	1.00012209	0	0	0	0	0	0	0	0	0	0	0	0	0	0	0	0	0	0	0	0	0	0	0	0	0	0	0	1.00012209	0	0
ENSDARG00000004282	0	0	0	0	0	0	0	0	0	0	0	0	0	0	0	0	0	0	0	0	0	0	0	0	0	0	0	0	0	0	0	0	0	0	0	0	0	0	0	0	0	0	0	0	0	0	0	0	0
ENSDARG00000004291	0	0	0	0	0	0	0	0	0	0	0	0	0	0	0	0	0	0	0	0	0	0	0	0	0	0	0	0	0	0	0	0	0	0	0	0	0	0	0	0	0	0	0	0	0	0	0	0	0
ENSDARG00000004297	0	0	0	0	0	0	0	0	0	1.00012209	0	0	0	0	0	0	0	1.00012209	0	0	0	0	1.00012209	0	0	0	0	0	0	0	0	0	0	0	1.00012209	0	0	0	0	0	0	0	0	0	0	0	0	0	0
ENSDARG00000004301	0	0	0	0	0	0	0	1.00012209	0	0	0	0	0	0	0	0	0	0	0	0	0	0	0	0	0	0	0	0	0	0	0	0	1.00012209	0	0	0	0	0	0	0	0	0	0	0	0	0	1.00012209	0	0
ENSDARG00000004305	1.00012209	0	0	0	0	0	0	0	0	0	0	0	0	0	0	0	0	3.00109917	0	0	0	0	0	0	0	0	0	0	0	0	0	0	0	0	0	0	0	0	0	0	0	0	0	0	0	0	0	0	0
ENSDARG00000004306	0	0	0	0	0	0	0	0	0	0	0	0	0	0	0	0	0	0	0	0	0	0	0	0	0	0	0	0	0	0	0	0	0	0	0	0	0	0	0	0	0	0	0	0	0	0	0	0	0
ENSDARG00000004307	0	0	0	0	0	0	0	0	0	0	0	0	0	0	0	0	0	0	0	0	0	0	0	0	0	0	0	0	0	0	0	0	0	0	0	0	0	0	0	0	0	0	0	0	0	0	0	0	0
ENSDARG00000004308	0	0	0	0	0	0	0	0	0	0	0	0	0	0	0	0	0	0	0	0	0	0	0	0	0	0	0	0	0	0	0	0	0	0	0	0	0	0	0	0	0	0	0	0	0	0	0	0	0
ENSDARG00000004311	0	0	0	0	0	0	0	0	0	0	0	0	0	0	0	0	0	0	0	0	0	0	0	0	0	0	0	0	0	0	0	0	0	0	0	0	0	0	0	0	0	0	0	0	0	0	0	0	0
ENSDARG00000004318	0	0	0	0	0	0	0	0	0	0	0	0	0	0	1.00012209	0	0	0	0	0	0	0	0	0	0	0	0	0	0	0	0	0	3.00109917	0	0	0	0	0	0	0	0	0	0	0	0	0	1.00012209	0	0
ENSDARG00000004322	0	0	0	0	0	0	0	0	0	0	0	0	0	0	0	0	0	0	0	0	0	0	0	0	0	0	0	0	0	0	0	0	0	0	0	0	0	0	0	0	0	0	0	0	0	0	0	0	0
ENSDARG00000004325	0	0	0	0	0	0	0	2.00048844	0	0	0	0	0	0	0	0	0	1.00012209	0	0	0	0	0	0	0	0	0	0	0	0	0	0	0	0	0	0	0	0	0	0	0	0	0	0	0	0	2.00048844	0	0
ENSDARG00000004336	0	0	0	0	0	0	0	0	0	0	0	0	0	0	0	0	0	0	0	0	0	0	0	0	0	0	0	0	0	0	0	0	0	0	0	0	0	0	0	0	0	0	0	0	0	0	0	0	0
ENSDARG00000004342	0	1.00012209	0	0	0	0	0	0	0	0	0	2.00048844	0	0	0	0	0	3.00109917	0	0	0	0	2.00048844	0	0	0	0	0	0	0	3.00109917	2.00048844	0	0	0	0	3.00109917	0	0	3.00109917	0	1.00012209	0	0	0	0	4.001954397	0	0
ENSDARG00000004343	0	0	0	0	0	0	0	0	0	0	0	0	0	0	0	0	0	1.00012209	1.00012209	0	0	0	1.00012209	0	0	0	0	0	0	0	0	0	0	0	0	0	0	0	0	1.00012209	0	0	0	0	0	0	0	0	0
ENSDARG00000004358	0	0	0	0	0	0	0	0	0	0	0	0	0	0	0	0	0	0	0	0	0	0	0	0	0	0	0	0	0	0	0	0	0	0	0	0	0	0	0	0	0	0	0	0	0	0	0	0	0
ENSDARG00000004363	0	0	0	0	0	0	0	0	0	3.00109917	0	1.00012209	0	0	0	0	0	4.001954397	0	0	0	0	0	0	0	0	0	0	0	0	0	0	0	0	0	0	0	0	0	0	0	0	0	0	0	0	3.00109917	0	0
ENSDARG00000004372	0	0	0	0	1.00012209	0	0	0	0	0	0	1.00012209	0	0	0	0	0	1.00012209	0	0	0	0	3.00109917	0	0	0	0	0	0	0	1.00012209	0	0	0	1.00012209	0	1.00012209	0	0	0	0	0	0	0	0	0	0	0	0
ENSDARG00000004377	0	0	0	0	0	0	2.00048844	2.00048844	0	14.02398044	0	0	0	0	1.00012209	0	0	1.00012209	2.00048844	0	0	0	0	0	1.00012209	0	0	0	0	0	6.004398828	8.007822687	0	0	1.00012209	0	0	0	0	0	0	3.00109917	0	1.00012209	0	0	6.004398828	0	0
ENSDARG00000004378	1.00012209	0	0	0	0	0	2.00048844	1.00012209	0	2.00048844	0	2.00048844	0	0	0	0	0	0	6.004398828	0	0	0	9.009902203	0	0	0	0	0	0	0	1.00012209	6.004398828	4.001954397	0	6.004398828	0	0	0	0	0	0	0	0	0	0	0	13.02067364	0	0
ENSDARG00000004392	0	0	0	0	0	0	0	0	0	0	0	0	0	0	0	0	0	0	0	0	0	0	0	0	0	0	0	0	0	0	0	0	0	0	0	0	0	0	0	0	0	0	0	0	0	0	0	0	0
ENSDARG00000004402	0	0	0	0	0	0	0	0	0	0	0	0	0	0	0	0	0	0	0	0	0	0	0	0	0	0	0	0	0	0	0	0	0	0	0	0	0	0	0	0	0	0	0	0	0	0	0	0	0
ENSDARG00000004406	0	0	0	0	0	0	0	0	0	0	0	0	0	0	0	0	0	0	0	0	0	0	0	0	0	0	0	0	0	0	0	0	1.00012209	0	0	0	0	0	0	0	0	0	0	0	0	0	2.00048844	0	0
ENSDARG00000004415	0	0	0	0	0	0	0	0	0	0	0	0	0	0	0	0	0	0	0	0	0	0	2.00048844	0	0	0	0	0	0	0	0	0	0	0	0	0	0	0	0	0	0	0	0	0	0	0	0	0	0
ENSDARG00000004427	0	0	0	0	0	0	0	0	0	0	0	0	0	0	0	0	0	3.00109917	0	0	0	0	0	0	1.00012209	0	0	0	0	0	0	0	0	0	0	0	0	0	0	0	0	0	0	0	0	0	1.00012209	0	0
ENSDARG00000004433	0	0	0	0	0	0	0	1.00012209	0	0	0	0	0	0	0	0	0	0	0	0	0	0	0	0	0	0	0	0	0	0	0	0	0	0	0	0	0	0	0	0	0	0	0	0	0	0	0	0	0
ENSDARG00000004436	0	0	0	0	0	0	0	0	0	0	0	0	0	0	0	0	0	0	0	0	0	0	0	0	0	0	0	0	0	0	0	0	0	0	0	0	0	0	0	0	0	0	0	0	0	0	0	0	0
ENSDARG00000004451	0	0	0	0	0	0	0	0	0	0	0	0	0	0	0	0	0	0	0	0	0	0	0	0	0	0	0	0	0	0	0	0	0	0	0	0	0	0	0	0	0	0	0	0	0	0	0	0	0
ENSDARG00000004452	0	0	0	0	0	0	0	3.00109917	0	1.00012209	0	0	0	0	0	0	0	4.001954397	1.00012209	0	0	0	4.001954397	0	2.00048844	0	1.00012209	0	0	0	0	0	1.00012209	0	0	0	0	0	0	1.00012209	0	0	0	1.00012209	0	0	2.00048844	0	0
ENSDARG00000004455	0	0	0	0	0	0	0	0	0	1.00012209	0	0	0	0	0	0	0	0	0	0	0	0	0	0	0	0	0	0	0	0	0	0	0	0	0	0	0	0	0	0	0	0	0	0	0	0	0	0	0
ENSDARG00000004459	0	0	0	0	0	0	0	0	0	0	0	0	0	0	0	0	0	0	0	0	0	0	0	0	0	0	0	0	0	0	0	0	0	0	0	0	0	0	0	0	0	0	0	0	0	0	0	0	0
ENSDARG00000004460	0	1.00012209	0	0	0	0	0	1.00012209	0	0	0	0	0	0	0	0	0	0	0	0	0	0	1.00012209	0	0	0	0	0	0	0	0	1.00012209	0	0	0	0	0	0	0	0	0	0	0	0	0	0	2.00048844	0	0
ENSDARG00000004470	1.00012209	0	0	0	0	1.00012209	0	1.00012209	0	3.00109917	0	0	0	0	0	0	0	12.01761253	0	0	0	0	3.00109917	0	1.00012209	0	0	0	0	0	0	2.00048844	0	0	0	0	0	0	0	1.00012209	0	1.00012209	0	0	0	0	0	0	0
ENSDARG00000004473	0	0	0	0	0	0	0	0	0	0	0	0	0	0	0	0	0	0	0	0	0	0	0	0	0	0	0	0	0	0	0	0	0	0	0	0	0	0	0	0	0	0	0	0	0	0	0	0	0
ENSDARG00000004492	0	0	0	0	0	0	0	0	0	0	0	0	0	0	0	0	0	2.00048844	0	0	0	0	0	0	0	0	0	0	0	0	0	0	0	0	0	0	0	0	0	0	0	0	0	0	0	0	0	0	0
ENSDARG00000004502	0	0	0	0	0	0	0	0	0	0	0	0	0	0	0	0	0	0	0	0	0	0	0	0	0	0	0	0	0	0	0	0	0	0	0	0	0	0	0	0	0	0	0	0	0	0	0	0	0
ENSDARG00000004517	0	0	0	0	0	0	0	0	0	0	0	0	0	0	0	0	0	0	0	0	0	0	1.00012209	0	0	0	0	0	0	0	0	0	0	0	0	0	0	0	0	0	0	0	0	0	0	0	0	0	0
ENSDARG00000004525	0	0	0	0	0	0	0	0	0	0	0	0	0	0	0	0	0	1.00012209	0	0	0	0	0	0	0	0	0	0	0	0	3.00109917	2.00048844	0	0	0	0	0	0	0	1.00012209	0	0	0	0	0	0	2.00048844	0	0
ENSDARG00000004527	0	0	0	0	0	0	0	1.00012209	0	0	0	0	0	0	0	0	0	1.00012209	0	0	0	0	0	0	1.00012209	0	0	0	0	0	1.00012209	0	0	0	0	0	0	0	0	1.00012209	0	0	0	0	0	0	1.00012209	0	0
ENSDARG00000004529	0	0	0	0	0	0	0	0	0	1.00012209	0	0	0	0	0	0	0	0	0	0	0	0	0	0	0	0	0	0	0	0	0	0	0	0	0	0	0	0	0	0	0	0	0	0	0	0	0	0	0
ENSDARG00000004532	0	0	0	0	0	0	0	0	0	0	0	0	0	0	0	0	0	0	0	0	0	0	0	0	0	0	0	0	0	0	0	0	0	0	0	0	0	0	0	0	0	0	0	0	0	0	0	0	0
ENSDARG00000004537	1.00012209	0	0	0	0	0	0	2.00048844	0	5.003054244	0	1.00012209	0	0	0	0	0	2.00048844	0	0	0	0	0	0	0	0	0	0	0	0	1.00012209	1.00012209	0	0	0	0	1.00012209	0	0	0	0	0	0	0	0	0	4.001954397	0	0
ENSDARG00000004539	1.00012209	1.00012209	2.00048844	0	1.00012209	0	0	0	0	1.00012209	0	1.00012209	0	0	9.009902203	0	0	59.42905187	1.00012209	0	0	0	94.07204445	0	0	0	0	0	0	0	0	2.00048844	0	0	1.00012209	0	0	0	0	1.00012209	0	0	0	1.00012209	0	0	21.05401772	0	0
ENSDARG00000004541	0	0	0	0	0	0	0	0	0	0	0	0	0	0	0	0	0	0	0	0	0	0	0	0	0	0	0	0	0	0	0	0	0	0	0	0	0	0	0	0	0	0	0	0	0	0	0	0	0
ENSDARG00000004561	0	0	0	0	0	0	0	0	0	0	0	0	0	0	0	0	0	0	0	0	0	0	0	0	0	0	0	0	0	0	0	0	0	0	0	0	0	0	0	0	0	0	0	0	0	0	0	0	0
ENSDARG00000004574	0	0	0	0	0	0	0	0	0	0	0	0	0	0	0	0	0	0	0	0	0	0	0	0	0	0	0	0	0	0	0	0	0	0	0	0	0	0	0	0	0	0	0	0	0	0	0	0	0
ENSDARG00000004581	0	0	0	0	0	0	1.00012209	0	0	0	0	0	0	0	0	0	0	2.00048844	2.00048844	0	0	0	1.00012209	0	0	0	0	0	0	0	0	0	0	0	0	0	0	0	0	3.00109917	0	0	0	0	0	0	0	0	0
ENSDARG00000004587	0	0	0	0	0	0	0	1.00012209	0	0	0	0	0	0	1.00012209	0	0	1.00012209	0	0	0	0	1.00012209	0	0	0	0	0	0	0	2.00048844	0	0	0	1.00012209	0	0	0	0	0	0	0	0	0	0	0	1.00012209	0	0
ENSDARG00000004588	0	0	0	0	0	0	0	0	0	1.00012209	0	0	0	0	0	0	0	0	4.001954397	0	0	0	0	0	0	0	0	0	0	0	0	0	0	0	0	0	0	0	0	5.003054244	0	0	0	0	0	0	5.003054244	0	0
ENSDARG00000004592	0	0	0	0	0	1.00012209	0	0	0	7.005988269	0	0	0	0	0	0	0	0	0	0	0	3.00109917	0	0	1.00012209	0	0	0	0	0	0	0	0	0	0	0	0	0	0	0	0	0	0	0	0	0	0	0	0
ENSDARG00000004594	0	0	0	0	0	0	0	0	0	0	0	0	0	0	0	0	0	0	0	0	0	0	0	0	0	0	0	0	0	0	0	0	0	0	0	0	0	0	0	0	0	0	0	0	0	0	0	0	0
ENSDARG00000004616	0	0	0	0	0	0	1.00012209	3.00109917	0	0	0	2.00048844	0	0	0	0	0	1.00012209	1.00012209	0	0	0	0	0	0	0	0	0	0	0	0	0	0	0	0	0	0	0	0	0	0	0	0	0	0	0	1.00012209	0	0
ENSDARG00000004618	0	0	0	1.00012209	0	0	1.00012209	0	0	0	0	0	0	0	0	0	0	0	0	0	0	0	0	0	0	0	0	0	0	0	0	0	0	0	0	0	0	0	0	0	0	0	0	0	0	0	0	0	0
ENSDARG00000004621	0	0	0	1.00012209	0	0	4.001954397	0	0	0	0	0	0	0	2.00048844	0	0	0	4.001954397	0	0	0	6.004398828	0	0	0	0	0	0	0	8.007822687	0	7.005988269	0	1.00012209	1.00012209	1.00012209	0	0	0	0	0	0	0	0	0	7.005988269	0	0
ENSDARG00000004632	0	0	0	0	0	0	0	0	0	0	0	0	0	0	2.00048844	0	0	0	0	0	0	0	1.00012209	0	0	0	0	0	0	0	0	0	1.00012209	0	0	0	0	0	0	0	0	0	0	0	0	0	0	0	0
ENSDARG00000004634	2.00048844	0	0	0	0	0	1.00012209	3.00109917	0	2.00048844	0	0	0	0	0	0	0	2.00048844	0	0	0	0	1.00012209	0	0	0	0	0	0	0	0	0	0	2.00048844	0	0	1.00012209	0	0	0	0	0	0	0	0	0	0	0	0
ENSDARG00000004635	0	0	0	0	0	0	0	0	0	0	0	0	0	0	0	0	0	0	0	0	0	0	0	0	1.00012209	0	0	0	0	0	0	0	0	0	0	0	0	0	0	0	0	0	0	0	0	0	0	0	0
ENSDARG00000004636	0	0	0	0	0	0	0	0	0	0	0	0	0	0	0	0	0	0	0	0	0	0	0	0	0	0	0	0	0	0	0	0	0	0	0	0	0	0	0	0	0	1.00012209	0	0	0	0	2.00048844	0	0
ENSDARG00000004647	1.00012209	0	0	0	0	0	0	0	0	0	0	0	0	0	0	0	0	0	0	0	0	0	0	0	0	0	0	0	0	0	0	0	0	0	0	0	0	0	0	0	0	0	0	0	0	0	0	0	0
ENSDARG00000004648	0	0	0	0	0	0	0	0	0	0	0	0	0	0	0	0	0	0	0	0	0	0	0	0	0	0	0	0	0	0	0	0	0	0	0	0	0	0	0	0	0	0	0	0	0	0	0	0	0
ENSDARG00000004665	0	3.00109917	0	0	2.00048844	0	0	5.003054244	1.00012209	2.00048844	0	1.00012209	2.00048844	0	0	0	0	29.10314829	4.001954397	0	1.00012209	0	6.004398828	0	0	0	0	0	0	2.00048844	0	8.007822687	2.00048844	0	0	0	0	0	0	5.003054244	0	0	0	1.00012209	0	0	5.003054244	0	0
ENSDARG00000004672	0	0	0	0	0	0	0	0	0	0	0	0	0	0	0	0	0	0	0	0	0	0	0	0	0	0	0	0	0	0	0	0	0	0	0	0	0	0	0	0	0	0	0	0	0	0	0	0	0
ENSDARG00000004680	0	0	0	0	0	0	0	0	0	0	0	1.00012209	0	0	0	0	0	1.00012209	0	0	0	0	0	0	0	0	0	0	0	0	0	0	0	0	0	0	0	0	0	0	0	0	0	0	0	0	1.00012209	0	0
ENSDARG00000004687	0	0	0	0	0	0	0	0	0	0	0	0	0	0	0	0	0	1.00012209	0	0	0	0	0	0	1.00012209	0	0	0	0	0	0	0	0	0	0	0	0	0	0	0	0	0	0	0	0	0	0	0	0
ENSDARG00000004692	0	0	0	0	0	0	0	0	0	1.00012209	0	0	0	0	1.00012209	0	0	0	0	0	0	0	1.00012209	0	0	0	0	0	0	0	0	0	0	0	0	0	0	0	0	0	0	0	0	0	0	0	0	0	0
ENSDARG00000004696	0	0	0	0	0	0	0	0	0	0	0	0	0	0	0	0	0	1.00012209	0	0	0	0	0	0	1.00012209	0	0	0	0	0	0	0	0	0	0	0	0	0	0	0	0	0	0	0	0	0	0	0	0
ENSDARG00000004697	1.00012209	0	0	0	0	0	0	1.00012209	0	2.00048844	0	0	0	0	0	0	0	0	0	0	0	0	0	0	0	0	0	0	0	0	0	0	0	0	0	0	0	0	0	0	0	0	0	0	0	0	0	0	0
ENSDARG00000004702	1.00012209	0	0	0	0	0	0	1.00012209	0	0	0	0	0	0	2.00048844	0	0	3.00109917	1.00012209	0	0	0	3.00109917	0	0	0	0	0	0	0	0	0	0	0	3.00109917	0	0	0	0	4.001954397	0	0	0	0	0	0	2.00048844	0	0
ENSDARG00000004706	1.00012209	0	0	0	0	0	0	0	0	2.00048844	0	0	0	0	0	0	0	2.00048844	1.00012209	0	0	0	0	0	1.00012209	0	0	0	0	0	2.00048844	0	0	0	0	1.00012209	0	0	0	0	0	0	0	0	0	0	0	0	0
ENSDARG00000004714	0	0	0	0	0	1.00012209	1.00012209	0	0	4.001954397	0	0	0	0	0	0	0	2.00048844	3.00109917	0	0	0	4.001954397	0	2.00048844	0	1.00012209	0	0	0	1.00012209	1.00012209	0	1.00012209	3.00109917	0	0	0	0	2.00048844	0	0	0	0	0	0	22.05929444	0	0
ENSDARG00000004722	1.00012209	0	0	0	0	0	0	0	0	0	0	0	0	0	1.00012209	0	0	0	0	0	0	0	1.00012209	0	0	0	0	0	0	0	0	1.00012209	0	0	2.00048844	0	0	0	0	0	0	0	0	0	0	0	6.004398828	0	0
ENSDARG00000004724	3.00109917	0	0	0	0	0	0	0	0	3.00109917	0	0	0	0	0	0	0	0	0	0	0	0	0	0	1.00012209	0	0	0	0	0	0	0	0	1.00012209	0	0	1.00012209	0	0	0	0	0	0	0	0	0	0	0	0
ENSDARG00000004726	0	0	0	0	0	0	0	0	0	0	0	0	0	0	0	0	0	2.00048844	0	0	0	0	1.00012209	0	0	0	0	0	0	0	1.00012209	0	0	0	0	0	0	0	0	0	0	0	0	0	0	0	0	0	0
ENSDARG00000004727	0	0	0	0	0	0	1.00012209	0	0	0	0	0	0	0	0	0	0	2.00048844	1.00012209	0	0	0	0	0	0	0	0	0	0	0	0	1.00012209	0	0	0	0	0	0	0	0	0	0	0	0	0	0	0	0	0
ENSDARG00000004729	0	0	0	0	0	0	0	1.00012209	0	0	0	0	0	0	0	0	0	2.00048844	1.00012209	0	0	0	3.00109917	0	0	0	0	0	0	0	0	2.00048844	0	0	0	0	0	0	0	1.00012209	0	1.00012209	0	0	0	0	2.00048844	0	0
ENSDARG00000004735	0	0	0	0	2.00048844	1.00012209	0	2.00048844	0	2.00048844	0	1.00012209	0	0	1.00012209	0	0	4.001954397	3.00109917	0	0	0	2.00048844	0	1.00012209	0	0	0	0	0	3.00109917	0	0	0	5.003054244	0	4.001954397	0	0	3.00109917	0	0	0	0	0	0	5.003054244	0	0
ENSDARG00000004745	1.00012209	0	0	0	0	0	0	0	0	4.001954397	0	0	0	0	0	0	0	0	0	0	0	0	0	0	0	0	0	0	0	0	0	0	0	0	0	0	0	0	0	0	0	0	0	0	0	0	0	0	0
ENSDARG00000004753	0	0	0	0	0	0	0	0	0	0	0	0	0	0	0	0	0	0	0	0	0	0	0	0	0	0	0	0	0	0	0	0	0	0	0	0	0	0	0	0	0	0	0	0	0	0	0	0	0
ENSDARG00000004754	0	0	0	0	0	0	0	1.00012209	0	3.00109917	0	0	0	0	0	0	0	1.00012209	0	0	0	0	0	0	1.00012209	0	0	0	0	0	0	0	0	0	1.00012209	0	2.00048844	0	0	0	0	0	0	0	0	0	3.00109917	0	0
ENSDARG00000004757	1.00012209	0	0	0	0	0	1.00012209	2.00048844	0	14.02398044	0	1.00012209	0	0	0	0	0	7.005988269	4.001954397	0	0	0	3.00109917	0	0	0	0	0	0	0	1.00012209	1.00012209	2.00048844	2.00048844	3.00109917	0	4.001954397	0	0	0	0	0	0	0	0	0	10.01222694	0	0
ENSDARG00000004763	0	0	0	0	0	0	0	0	0	0	0	0	0	0	0	0	0	0	0	0	0	0	0	0	0	0	0	0	0	0	0	0	0	0	0	0	0	0	0	0	0	0	0	0	0	0	0	0	0
ENSDARG00000004771	0	0	0	0	0	0	0	0	0	0	0	0	0	0	0	0	0	1.00012209	0	0	0	0	1.00012209	0	0	0	0	0	0	0	1.00012209	0	0	0	0	0	0	0	0	0	0	0	0	0	0	0	0	0	0
ENSDARG00000004774	0	0	0	0	0	0	0	0	0	0	0	0	0	0	0	0	0	0	0	0	0	0	0	0	0	0	0	0	0	0	0	0	0	0	0	0	0	0	0	0	0	0	0	0	0	0	0	0	0
ENSDARG00000004780	0	0	0	0	0	0	0	0	0	0	0	0	0	0	0	0	0	0	0	0	0	0	0	0	0	0	0	0	0	0	0	0	0	0	0	0	0	0	0	0	0	0	0	0	0	0	1.00012209	0	0
ENSDARG00000004782	0	0	0	0	0	0	0	0	0	0	0	0	0	0	0	0	0	0	0	0	0	0	1.00012209	0	0	0	0	0	0	0	0	0	0	0	0	0	0	0	0	0	0	0	0	0	0	0	0	0	0
ENSDARG00000004785	0	0	0	0	0	0	0	0	1.00012209	2.00048844	0	0	0	0	1.00012209	0	0	1.00012209	0	0	0	0	2.00048844	0	1.00012209	0	0	0	0	0	0	0	0	0	0	0	0	0	0	0	0	0	0	0	0	0	1.00012209	0	0
ENSDARG00000004796	0	0	0	0	0	0	0	0	0	0	0	0	0	0	0	0	0	0	0	0	0	0	0	0	0	0	0	0	0	0	0	0	0	0	0	0	0	0	0	0	0	0	0	0	0	0	0	0	0
ENSDARG00000004798	0	0	0	0	0	0	0	0	0	0	0	0	0	0	2.00048844	0	0	0	0	0	0	0	0	0	0	0	0	0	0	0	0	0	0	0	0	0	0	0	0	2.00048844	0	0	0	0	0	0	0	0	0
ENSDARG00000004806	0	0	0	0	0	0	0	0	0	0	0	0	0	0	0	0	0	0	0	0	0	0	2.00048844	0	0	0	0	0	0	0	1.00012209	0	0	0	0	0	1.00012209	0	0	0	0	0	0	0	0	0	2.00048844	0	0
ENSDARG00000004830	0	0	0	0	0	0	0	3.00109917	0	2.00048844	0	2.00048844	0	0	2.00048844	0	0	1.00012209	1.00012209	0	0	0	0	0	0	0	0	0	0	0	0	1.00012209	1.00012209	0	0	0	0	0	0	1.00012209	0	0	0	0	0	0	1.00012209	0	0
ENSDARG00000004836	0	0	0	0	0	0	0	2.00048844	0	0	0	0	0	0	0	0	0	3.00109917	0	0	0	0	0	0	0	0	0	0	0	0	0	0	0	0	0	0	0	0	0	2.00048844	0	0	0	0	0	0	0	0	0
ENSDARG00000004840	0	0	0	0	0	0	0	1.00012209	0	0	0	0	0	0	1.00012209	0	0	0	3.00109917	0	0	0	5.003054244	0	0	0	0	0	0	0	7.005988269	1.00012209	4.001954397	0	1.00012209	0	1.00012209	0	0	0	0	0	0	0	0	0	3.00109917	0	0
ENSDARG00000004843	0	0	0	0	0	0	0	1.00012209	0	0	0	0	0	0	2.00048844	0	0	1.00012209	0	0	0	0	0	0	0	0	0	0	0	0	0	0	0	0	0	0	0	0	0	0	0	0	0	0	0	0	2.00048844	0	0
ENSDARG00000004845	0	0	0	0	0	0	0	0	0	0	0	0	0	0	0	0	0	0	0	0	0	0	0	0	0	0	0	0	0	0	0	0	0	0	0	0	0	0	0	0	0	0	0	0	0	0	0	0	0
ENSDARG00000004851	0	0	0	0	0	0	0	0	0	0	0	0	0	0	0	0	0	0	0	0	0	0	0	0	0	0	0	0	0	0	0	0	0	0	0	0	0	0	0	0	0	0	0	0	0	0	0	0	0
ENSDARG00000004861	0	0	0	0	0	0	0	0	0	6.004398828	0	0	0	0	0	0	0	0	0	0	0	0	0	0	0	0	0	0	0	0	0	0	0	0	0	0	0	0	0	0	0	0	0	0	0	0	0	0	0
ENSDARG00000004866	0	0	0	0	0	0	0	0	0	0	0	0	0	0	0	0	0	0	0	0	0	0	1.00012209	0	0	0	0	0	0	0	0	0	1.00012209	0	0	0	0	0	0	0	0	0	0	0	0	0	0	0	0
ENSDARG00000004870	0	0	0	0	0	0	0	1.00012209	0	0	0	0	0	0	1.00012209	0	0	0	0	0	0	0	0	0	0	0	0	0	0	0	1.00012209	0	2.00048844	0	1.00012209	0	0	0	0	0	0	0	0	0	0	0	2.00048844	0	0
ENSDARG00000004874	0	0	0	0	0	0	0	0	0	0	0	0	0	0	0	0	0	0	0	0	0	0	0	0	0	0	0	0	0	0	0	0	0	0	0	0	0	0	0	0	0	0	0	0	0	0	0	0	0
ENSDARG00000004875	0	0	0	0	0	0	0	0	0	0	0	0	0	0	0	0	0	0	2.00048844	0	0	0	1.00012209	0	0	0	0	0	0	0	0	1.00012209	0	0	1.00012209	0	3.00109917	0	0	0	0	0	0	0	0	0	0	0	0
ENSDARG00000004877	0	0	0	0	0	0	0	0	0	0	0	0	0	0	0	0	0	0	0	0	0	0	0	0	0	0	0	0	0	0	0	0	1.00012209	0	0	0	0	0	0	0	0	0	0	0	0	0	0	0	0
ENSDARG00000004880	0	0	0	0	0	0	0	0	0	0	0	0	0	0	0	0	0	0	0	0	0	0	2.00048844	0	1.00012209	0	0	0	0	0	0	0	0	0	0	0	0	0	0	0	0	0	0	0	0	0	0	0	0
ENSDARG00000004889	0	0	0	0	0	0	0	0	0	0	0	0	0	0	0	0	0	0	0	0	0	0	0	0	0	0	0	0	0	0	0	0	0	0	0	0	0	0	0	1.00012209	0	0	0	0	0	0	0	0	0
ENSDARG00000004891	0	0	2.00048844	0	0	0	0	0	0	3.00109917	0	0	0	0	0	0	0	1.00012209	0	0	0	0	0	0	0	0	0	0	0	0	0	0	0	0	0	0	0	0	0	0	0	0	0	0	0	0	1.00012209	0	0
ENSDARG00000004896	0	0	0	0	0	0	0	0	0	1.00012209	0	0	0	0	0	0	0	1.00012209	0	0	0	0	1.00012209	0	1.00012209	0	0	0	0	0	0	0	0	0	0	0	1.00012209	0	0	0	0	0	0	0	0	0	2.00048844	0	0
ENSDARG00000004906	0	0	1.00012209	0	0	0	0	0	0	4.001954397	0	2.00048844	0	0	0	0	0	3.00109917	0	0	0	0	0	0	1.00012209	0	0	0	0	0	0	3.00109917	1.00012209	0	0	0	0	0	0	0	0	0	0	1.00012209	0	0	2.00048844	0	0
ENSDARG00000004909	0	0	1.00012209	0	0	0	0	0	0	2.00048844	0	0	0	0	0	0	0	0	0	0	0	0	0	0	0	0	0	0	0	0	0	0	0	0	0	0	0	0	0	0	0	0	0	0	0	0	0	0	0
ENSDARG00000004917	0	0	0	0	0	0	0	0	0	0	0	2.00048844	0	0	0	0	0	0	0	0	0	0	0	0	0	0	0	0	0	0	1.00012209	0	0	0	0	0	0	0	0	1.00012209	0	0	0	0	0	0	0	0	0
ENSDARG00000004925	0	0	0	0	0	0	0	0	0	0	0	0	0	0	0	0	0	0	0	0	0	0	0	0	0	0	0	0	0	0	0	0	0	0	0	0	1.00012209	0	0	0	0	0	0	0	0	0	0	0	0
ENSDARG00000004926	0	0	0	0	0	0	0	0	0	0	0	0	0	0	0	0	0	0	0	0	0	0	0	0	0	0	0	0	0	0	0	0	0	0	0	0	0	0	0	0	0	0	0	0	0	0	0	0	0
ENSDARG00000004930	1.00012209	0	0	0	0	2.00048844	0	0	1.00012209	54.35911682	0	1.00012209	1.00012209	0	0	1.00012209	0	0	0	0	0	1.00012209	0	0	7.005988269	0	0	0	0	0	0	0	0	3.00109917	0	1.00012209	0	0	0	0	0	5.003054244	0	0	0	0	1.00012209	0	0
ENSDARG00000004931	0	0	0	0	0	0	0	0	0	0	0	0	0	0	0	0	0	0	0	0	0	0	0	0	0	0	0	0	0	0	0	0	0	0	0	0	0	0	0	0	0	0	0	0	0	0	0	0	0
ENSDARG00000004932	0	0	0	0	0	0	0	0	0	0	0	0	0	0	0	0	0	14.02398044	0	0	0	0	0	0	0	0	0	0	0	0	0	0	2.00048844	0	0	0	0	0	0	0	0	0	0	0	0	0	0	0	0
ENSDARG00000004937	0	0	0	0	0	0	0	0	0	0	0	0	0	0	0	0	0	0	0	0	0	0	0	0	0	0	0	0	0	0	0	0	0	0	0	0	0	0	0	0	0	0	0	0	0	0	0	0	0
ENSDARG00000004939	0	0	0	0	0	0	0	0	0	0	0	0	0	0	0	0	0	0	0	0	0	0	1.00012209	0	0	0	0	0	0	0	0	0	0	0	0	0	0	0	0	0	0	0	0	0	0	0	0	0	0
ENSDARG00000004948	0	0	0	0	0	0	0	1.00012209	0	0	0	0	0	0	0	0	0	1.00012209	2.00048844	0	0	0	0	0	0	0	0	0	0	0	0	0	0	0	1.00012209	0	0	0	0	0	0	0	0	0	0	0	4.001954397	0	0
ENSDARG00000004952	0	0	0	0	0	0	0	0	0	0	0	0	0	0	0	0	0	0	0	0	0	0	0	0	0	0	0	0	0	0	0	0	0	0	0	0	0	0	0	0	0	0	0	0	0	0	0	0	0
ENSDARG00000004953	0	0	0	0	0	0	0	0	0	0	0	0	0	0	0	0	0	0	0	0	0	0	0	0	0	0	0	0	0	0	0	0	0	0	0	0	0	0	0	0	0	0	0	0	0	0	0	0	0
ENSDARG00000004954	10.01222694	0	0	0	0	0	1.00012209	5.003054244	0	0	0	1.00012209	0	0	0	0	0	4.001954397	1.00012209	0	0	0	0	0	0	0	0	0	0	0	0	3.00109917	0	0	2.00048844	0	0	0	0	0	0	0	0	0	0	1.00012209	0	0	0
ENSDARG00000004956	0	0	0	0	0	0	0	0	0	0	0	0	0	0	0	0	0	0	0	0	0	0	0	0	1.00012209	0	0	0	0	0	0	0	0	0	1.00012209	0	0	0	0	0	0	0	0	0	0	0	2.00048844	0	0
ENSDARG00000004958	0	0	0	0	0	0	0	0	0	1.00012209	0	0	0	0	0	0	0	0	0	0	0	0	0	0	0	0	0	0	0	0	0	0	0	0	0	0	0	0	0	0	0	0	0	0	0	0	0	0	0
ENSDARG00000004964	0	0	0	0	0	0	0	0	0	0	0	0	0	0	0	0	0	0	0	0	0	0	0	0	0	0	0	0	0	0	0	0	0	0	0	0	0	0	0	0	0	0	0	0	0	0	0	0	0
ENSDARG00000004979	2.00048844	0	0	0	0	0	0	0	0	1.00012209	0	0	0	0	3.00109917	0	0	0	1.00012209	0	0	0	2.00048844	0	0	0	0	0	0	0	1.00012209	0	0	0	0	2.00048844	0	0	0	0	0	0	0	0	0	0	1.00012209	0	0
ENSDARG00000005002	0	0	0	0	0	0	0	0	0	0	0	0	0	0	0	0	0	3.00109917	0	0	0	0	0	0	0	0	0	0	0	0	0	0	0	0	0	0	0	0	0	0	0	0	0	0	0	0	0	0	0
ENSDARG00000005015	1.00012209	0	0	0	0	0	0	0	0	0	0	0	0	0	0	0	0	1.00012209	1.00012209	0	0	0	0	0	0	0	0	0	0	0	0	1.00012209	1.00012209	0	0	0	0	0	0	0	0	1.00012209	0	0	0	0	1.00012209	0	0
ENSDARG00000005023	0	0	2.00048844	0	0	0	0	0	0	0	0	0	0	0	2.00048844	0	0	21.05401772	3.00109917	0	0	0	2.00048844	0	0	0	0	0	0	0	1.00012209	0	0	1.00012209	1.00012209	0	0	0	0	2.00048844	0	0	0	0	0	0	3.00109917	0	0
ENSDARG00000005026	0	0	0	0	0	0	0	0	0	1.00012209	0	0	0	0	0	0	0	5.003054244	0	0	0	0	0	0	0	0	0	0	0	0	0	0	0	0	0	0	0	0	0	0	0	0	0	0	0	0	0	0	0
ENSDARG00000005033	0	0	0	0	0	0	0	0	0	0	0	0	0	0	0	0	0	0	0	0	0	0	0	0	0	0	0	0	0	0	0	0	0	0	0	0	0	0	0	0	0	0	0	0	0	0	1.00012209	0	0
ENSDARG00000005034	0	0	0	0	0	0	0	0	0	0	0	0	0	0	0	0	0	0	0	0	0	0	0	0	0	0	0	0	0	0	0	0	0	0	0	0	0	0	0	3.00109917	0	0	0	0	0	0	0	0	0
ENSDARG00000005039	0	1.00012209	0	0	0	0	0	1.00012209	0	18.03966704	0	0	2.00048844	0	0	0	0	0	1.00012209	0	0	0	0	0	0	0	0	0	0	0	1.00012209	0	0	2.00048844	0	1.00012209	1.00012209	0	0	0	0	0	0	0	0	0	3.00109917	0	0
ENSDARG00000005049	2.00048844	0	0	0	0	0	0	1.00012209	0	1.00012209	0	0	0	0	2.00048844	0	0	0	0	0	0	0	1.00012209	0	0	0	0	0	0	0	0	0	0	0	0	0	0	0	0	0	0	0	0	0	0	0	0	0	0
ENSDARG00000005050	0	0	0	0	0	0	0	0	0	0	0	0	0	0	0	0	0	0	0	0	0	0	0	0	0	0	0	0	0	0	0	0	0	0	0	0	0	0	0	0	0	0	0	0	0	0	0	0	0
ENSDARG00000005057	0	0	0	0	0	0	0	0	0	0	0	0	0	0	0	0	0	1.00012209	0	0	0	0	0	0	0	0	0	0	0	0	0	0	0	0	0	0	0	0	0	0	0	0	0	0	0	0	0	0	0
ENSDARG00000005078	0	0	1.00012209	0	0	0	0	2.00048844	0	2.00048844	0	0	0	0	0	0	0	1.00012209	1.00012209	0	0	0	0	0	0	0	0	0	0	0	1.00012209	0	0	0	1.00012209	0	0	0	0	2.00048844	0	0	0	0	0	0	0	0	0
ENSDARG00000005085	0	0	0	0	0	0	0	0	0	0	0	0	0	0	0	0	0	1.00012209	1.00012209	0	0	0	1.00012209	0	0	0	0	0	0	0	0	0	0	0	0	0	1.00012209	0	0	0	0	0	0	0	0	0	0	0	0
ENSDARG00000005092	0	0	0	0	0	0	0	0	0	0	0	0	0	0	0	0	0	0	0	0	0	0	0	0	0	0	0	0	0	0	0	0	0	0	0	0	0	0	0	0	0	0	0	0	0	0	0	0	0
ENSDARG00000005098	0	0	0	0	0	0	0	0	0	0	0	0	0	0	0	0	0	0	0	0	0	0	0	0	0	0	0	0	0	0	0	0	0	0	0	0	0	0	0	0	0	0	0	0	0	0	0	0	0
ENSDARG00000005104	0	0	0	0	0	0	0	0	0	0	0	0	0	0	0	0	0	3.00109917	0	0	0	0	0	0	0	0	0	0	0	0	0	0	0	0	0	0	0	0	0	0	0	1.00012209	0	0	0	0	0	0	0
ENSDARG00000005115	0	0	0	0	0	0	0	1.00012209	0	0	0	0	0	0	0	0	0	7.005988269	0	0	0	0	0	0	0	0	0	0	0	0	0	0	1.00012209	0	3.00109917	0	0	0	0	1.00012209	0	0	0	1.00012209	0	0	1.00012209	0	0
ENSDARG00000005121	0	0	0	0	0	0	0	2.00048844	0	29.10314829	0	0	0	1.00012209	0	0	0	2.00048844	0	0	0	1.00012209	0	0	4.001954397	0	0	0	0	2.00048844	0	0	0	0	0	0	0	0	0	2.00048844	0	0	0	0	0	0	1.00012209	0	0
ENSDARG00000005122	0	0	0	0	0	0	0	3.00109917	0	1.00012209	0	0	0	0	0	0	0	6.004398828	0	0	0	0	3.00109917	0	0	0	0	0	0	0	0	0	1.00012209	0	1.00012209	0	0	0	0	4.001954397	0	0	0	0	0	0	0	0	0
ENSDARG00000005126	0	0	0	0	0	0	0	0	0	0	0	0	0	0	0	0	0	0	0	0	0	0	0	0	0	0	0	0	0	0	0	0	0	0	0	0	0	0	0	0	0	0	0	0	0	0	0	0	0
ENSDARG00000005128	0	0	0	0	0	0	0	0	0	0	0	0	0	0	0	0	0	0	0	0	0	0	0	0	0	0	0	0	0	0	0	0	0	0	0	0	0	0	0	0	0	0	0	0	0	0	0	0	0
ENSDARG00000005134	0	0	0	0	0	0	0	2.00048844	0	1.00012209	0	0	1.00012209	1.00012209	0	0	0	0	0	0	0	0	1.00012209	0	0	0	0	0	0	0	1.00012209	0	2.00048844	0	0	0	0	0	0	1.00012209	0	0	0	0	0	0	0	0	0
ENSDARG00000005139	0	0	0	0	0	0	0	0	0	0	0	0	0	0	0	0	0	0	0	0	0	0	0	0	0	0	0	0	0	0	0	0	0	0	0	0	0	0	0	0	0	0	0	0	0	0	0	0	0
ENSDARG00000005141	0	0	0	0	0	0	0	0	0	0	0	0	0	0	0	0	0	0	0	0	0	0	0	0	0	0	0	0	0	0	0	0	0	0	0	0	0	0	0	0	0	0	0	0	0	0	0	0	0
ENSDARG00000005150	0	0	0	0	0	0	0	0	1.00012209	11.01479701	0	0	0	0	0	0	0	0	0	0	0	0	0	0	1.00012209	0	0	0	0	2.00048844	0	0	0	1.00012209	0	0	0	0	0	0	0	1.00012209	0	0	0	0	1.00012209	0	0
ENSDARG00000005154	2.00048844	0	0	0	0	0	0	0	0	0	0	0	0	0	0	0	0	0	0	0	0	0	0	0	0	0	0	0	0	0	0	0	0	0	0	0	0	0	0	0	0	0	0	0	0	0	0	0	0
ENSDARG00000005159	0	0	0	0	0	0	0	0	0	0	0	0	0	0	1.00012209	0	0	1.00012209	0	0	0	0	0	0	0	0	0	0	0	0	0	4.001954397	0	0	2.00048844	0	1.00012209	0	0	1.00012209	0	0	0	0	0	0	4.001954397	0	0
ENSDARG00000005161	0	0	0	0	0	0	0	0	0	6.004398828	0	0	0	0	0	0	0	0	0	0	0	0	0	0	1.00012209	0	0	0	0	0	0	0	0	0	0	0	0	0	0	0	0	0	0	0	0	0	0	0	0
ENSDARG00000005162	2.00048844	0	0	0	1.00012209	0	0	3.00109917	0	2.00048844	0	0	0	0	1.00012209	0	0	10.01222694	1.00012209	0	0	0	4.001954397	0	0	0	0	0	0	1.00012209	1.00012209	2.00048844	0	0	0	0	0	0	0	11.01479701	0	0	0	1.00012209	0	0	13.02067364	0	0
ENSDARG00000005172	0	0	0	0	0	0	1.00012209	0	0	0	0	0	0	0	0	0	0	0	0	0	0	0	0	0	0	0	0	0	0	0	1.00012209	1.00012209	0	0	0	0	0	0	0	0	0	0	0	0	0	0	0	0	0
ENSDARG00000005179	0	0	0	0	0	0	0	0	0	1.00012209	0	0	0	0	0	0	0	0	1.00012209	0	0	0	0	0	0	0	0	0	0	0	0	0	0	0	0	0	0	0	0	0	0	0	0	0	0	0	0	0	0
ENSDARG00000005185	0	0	0	0	0	0	0	0	0	0	0	0	0	0	0	0	0	0	0	0	0	0	0	0	0	0	0	0	0	0	0	0	0	0	0	0	0	0	0	0	0	0	0	0	0	0	0	0	0
ENSDARG00000005186	0	0	0	0	0	0	0	0	0	2.00048844	0	0	0	0	0	0	0	1.00012209	2.00048844	0	0	0	0	0	0	0	0	0	0	0	0	0	0	0	0	0	0	0	0	0	0	0	0	0	0	0	0	0	0
ENSDARG00000005191	0	0	0	0	0	0	0	1.00012209	0	0	0	0	0	0	0	0	0	11.01479701	0	0	0	0	0	0	0	0	0	0	0	0	0	0	0	0	0	0	0	0	0	0	0	0	0	0	0	0	0	1.00012209	0
ENSDARG00000005218	0	0	0	0	0	0	0	1.00012209	0	0	0	0	0	0	0	0	0	0	0	0	0	0	0	0	0	0	0	0	0	0	0	0	0	0	0	0	0	0	0	0	0	0	0	0	0	0	1.00012209	0	0
ENSDARG00000005220	0	1.00012209	0	0	0	0	1.00012209	0	0	1.00012209	0	1.00012209	0	0	0	0	0	3.00109917	0	0	0	0	0	0	0	0	0	0	0	0	2.00048844	2.00048844	0	0	0	0	0	0	0	1.00012209	0	0	0	0	0	0	1.00012209	0	0
ENSDARG00000005221	0	0	0	0	0	0	0	0	0	0	0	0	0	0	0	0	0	0	0	0	0	0	0	0	0	0	0	0	0	0	0	0	0	0	0	0	0	0	0	0	0	0	0	0	0	0	0	0	0
ENSDARG00000005230	2.00048844	0	0	0	0	0	0	1.00012209	0	2.00048844	0	1.00012209	0	0	0	0	0	16.03133162	3.00109917	0	0	1.00012209	8.007822687	0	0	0	0	0	1.00012209	0	2.00048844	1.00012209	1.00012209	0	2.00048844	0	3.00109917	0	0	4.001954397	0	0	0	0	0	0	9.009902203	0	0
ENSDARG00000005232	0	0	0	0	0	0	0	0	0	0	0	0	0	0	0	0	0	1.00012209	0	0	0	0	0	0	0	0	0	0	0	0	0	0	0	0	0	0	0	0	0	0	0	0	0	0	0	0	0	0	0
ENSDARG00000005236	0	0	0	0	0	0	0	0	0	0	0	0	0	0	0	0	0	3.00109917	0	0	0	0	1.00012209	0	0	0	0	0	0	0	0	1.00012209	2.00048844	0	0	0	0	0	0	2.00048844	0	0	0	0	0	0	1.00012209	0	0
ENSDARG00000005246	0	0	0	0	0	0	0	0	0	0	0	0	0	0	0	0	0	0	0	0	0	0	0	0	0	0	0	0	0	0	0	0	0	0	1.00012209	0	0	0	0	0	0	0	0	0	0	0	0	0	0
ENSDARG00000005251	0	0	0	0	0	0	0	0	0	0	0	0	0	0	0	0	0	3.00109917	0	0	0	0	2.00048844	0	0	0	0	0	0	0	0	0	0	0	0	0	0	0	0	0	0	0	0	0	0	0	0	0	0
ENSDARG00000005254	0	0	0	0	0	0	0	2.00048844	0	2.00048844	0	2.00048844	0	0	2.00048844	0	0	9.009902203	0	0	0	0	5.003054244	0	3.00109917	0	0	0	0	0	0	3.00109917	0	0	0	0	0	0	0	2.00048844	0	1.00012209	0	0	0	0	6.004398828	0	0
ENSDARG00000005271	0	0	0	0	0	0	0	0	0	0	0	0	0	0	0	0	0	0	0	0	0	0	0	0	0	0	0	0	0	0	0	0	0	0	0	0	0	0	0	0	0	0	0	0	0	0	0	0	0
ENSDARG00000005273	0	0	0	0	0	0	0	1.00012209	0	0	0	0	0	0	0	0	0	0	0	0	0	0	0	0	0	0	0	0	0	0	0	0	0	0	0	0	0	0	0	0	0	1.00012209	0	0	0	0	1.00012209	0	0
ENSDARG00000005274	0	0	0	0	0	0	0	0	0	0	0	0	0	0	0	0	0	0	0	0	0	0	0	0	0	0	0	0	0	0	0	0	0	0	0	0	0	0	0	0	0	0	0	0	0	0	0	0	0
ENSDARG00000005284	0	0	0	0	0	0	0	0	0	0	0	0	0	0	0	0	0	0	0	0	0	0	0	0	0	0	0	0	0	0	0	0	0	0	0	0	0	0	0	0	0	0	0	0	0	0	0	0	0
ENSDARG00000005315	2.00048844	0	1.00012209	0	0	0	0	2.00048844	0	1.00012209	0	0	0	0	1.00012209	0	0	0	1.00012209	0	0	0	0	0	1.00012209	0	0	0	0	0	2.00048844	0	0	2.00048844	2.00048844	0	0	0	0	0	0	0	0	0	0	0	7.005988269	0	0
ENSDARG00000005318	0	0	0	0	0	0	0	1.00012209	0	0	0	0	0	0	0	0	0	0	0	0	0	0	0	0	0	0	0	0	0	0	1.00012209	0	0	0	0	0	1.00012209	0	0	0	0	0	0	0	0	0	2.00048844	0	0
ENSDARG00000005333	3.00109917	0	0	0	1.00012209	0	1.00012209	2.00048844	0	4.001954397	0	2.00048844	0	0	2.00048844	0	0	5.003054244	1.00012209	0	0	0	5.003054244	0	1.00012209	0	0	0	0	0	3.00109917	0	0	0	5.003054244	1.00012209	3.00109917	0	0	3.00109917	0	1.00012209	0	1.00012209	0	0	8.007822687	0	0
ENSDARG00000005343	0	0	0	0	0	0	0	0	0	0	0	0	0	0	0	0	0	0	0	0	0	0	0	0	0	0	0	0	0	0	0	0	0	0	0	0	0	0	0	0	0	0	0	0	0	0	0	0	0
ENSDARG00000005350	0	0	0	0	0	0	0	2.00048844	0	3.00109917	0	0	0	0	1.00012209	0	0	1.00012209	2.00048844	0	0	0	7.005988269	0	0	0	0	0	0	0	0	2.00048844	0	0	1.00012209	0	0	0	0	0	0	0	0	0	0	0	4.001954397	0	0
ENSDARG00000005355	1.00012209	0	0	0	0	0	0	0	0	1.00012209	0	0	0	0	0	0	0	2.00048844	0	0	0	0	1.00012209	0	0	0	0	0	0	0	0	0	1.00012209	0	0	0	0	0	0	0	0	0	0	0	0	1.00012209	0	0	0
ENSDARG00000005356	0	0	0	0	0	0	0	0	0	0	0	0	0	0	0	0	0	0	0	0	0	0	1.00012209	0	0	0	0	0	0	0	0	0	0	0	0	0	0	0	0	0	0	1.00012209	0	0	0	0	2.00048844	0	0
ENSDARG00000005359	1.00012209	0	0	0	0	0	0	0	0	9.009902203	0	0	0	1.00012209	0	0	0	2.00048844	0	0	0	0	0	0	2.00048844	0	0	0	0	0	0	0	2.00048844	0	0	0	0	0	0	0	0	0	0	0	0	0	2.00048844	0	0
ENSDARG00000005368	0	0	1.00012209	0	0	2.00048844	0	0	0	15.02753306	0	1.00012209	0	0	1.00012209	0	0	0	0	0	0	0	1.00012209	0	3.00109917	0	0	0	0	1.00012209	6.004398828	0	0	0	1.00012209	0	2.00048844	0	0	0	0	8.007822687	0	3.00109917	0	0	19.04420413	0	0
ENSDARG00000005374	0	0	0	0	0	0	0	0	0	0	0	0	0	0	0	0	0	0	0	0	0	0	0	0	0	0	0	0	0	0	0	0	0	0	0	0	0	0	0	0	0	0	0	0	0	0	0	0	0
ENSDARG00000005377	0	0	0	0	0	0	0	0	0	0	0	0	0	0	0	0	0	0	0	0	0	0	0	0	0	0	0	0	0	0	1.00012209	0	0	0	0	0	0	0	0	0	0	0	0	0	0	0	0	0	0
ENSDARG00000005382	0	0	0	0	0	0	0	0	0	0	0	0	0	0	0	0	0	0	0	0	0	0	0	0	0	0	0	0	0	0	0	0	0	0	0	0	0	0	0	0	0	0	0	0	0	0	0	0	0
ENSDARG00000005394	0	0	0	0	0	0	0	0	0	0	0	0	0	0	0	0	0	0	0	0	0	0	0	0	0	0	0	0	0	0	0	0	0	0	0	0	0	0	0	0	0	0	0	0	0	0	0	0	0
ENSDARG00000005397	0	0	0	0	0	0	0	0	0	2.00048844	0	0	1.00012209	0	0	0	0	1.00012209	0	0	0	1.00012209	0	0	0	0	0	0	0	0	0	0	0	0	0	0	0	0	0	1.00012209	0	1.00012209	0	0	0	0	4.001954397	0	0
ENSDARG00000005414	6.004398828	0	0	0	0	0	1.00012209	2.00048844	0	1.00012209	0	0	0	0	0	0	0	0	0	0	0	0	0	0	0	0	0	0	0	0	0	0	0	0	0	0	1.00012209	0	0	0	0	0	0	0	0	0	6.004398828	0	0
ENSDARG00000005416	0	0	0	0	0	0	0	0	0	1.00012209	0	0	0	0	0	0	0	0	0	0	0	0	0	0	3.00109917	0	0	0	0	0	0	0	0	0	0	0	1.00012209	0	0	0	0	0	0	0	0	0	0	0	0
ENSDARG00000005419	0	0	0	0	0	0	0	0	0	0	0	0	0	0	0	0	0	0	0	0	0	0	0	0	0	0	0	0	0	0	0	0	0	0	0	0	0	0	0	0	0	0	0	0	0	0	0	0	0
ENSDARG00000005423	0	2.00048844	0	0	0	0	0	2.00048844	0	6.004398828	0	0	0	0	1.00012209	0	0	20.04898766	1.00012209	0	0	0	5.003054244	0	1.00012209	0	0	0	0	1.00012209	2.00048844	2.00048844	0	0	1.00012209	0	2.00048844	0	0	0	0	0	0	0	0	0	27.08938227	0	0
ENSDARG00000005425	0	1.00012209	0	0	0	0	0	4.001954397	0	0	0	0	0	0	2.00048844	0	0	8.007822687	3.00109917	0	0	0	0	0	0	0	0	0	0	0	0	2.00048844	0	0	0	0	1.00012209	0	0	2.00048844	0	1.00012209	0	0	0	0	6.004398828	0	0
ENSDARG00000005446	0	0	0	0	0	0	1.00012209	0	0	0	0	0	0	0	0	0	0	0	0	0	0	0	0	0	0	0	0	0	0	0	0	0	0	1.00012209	1.00012209	0	0	0	0	0	0	0	0	0	0	0	1.00012209	0	0
ENSDARG00000005448	0	1.00012209	0	0	0	0	0	0	0	3.00109917	0	0	0	0	0	0	0	0	0	0	0	0	0	0	0	0	0	0	0	0	0	0	0	0	0	0	0	0	0	0	0	0	0	0	0	0	2.00048844	0	0
ENSDARG00000005451	0	0	0	0	0	1.00012209	0	9.009902203	0	1.00012209	0	4.001954397	0	0	6.004398828	0	0	21.05401772	1.00012209	0	0	0	13.02067364	0	0	0	0	0	0	1.00012209	5.003054244	1.00012209	2.00048844	2.00048844	2.00048844	0	1.00012209	1.00012209	0	2.00048844	0	0	0	0	0	0	10.01222694	0	0
ENSDARG00000005453	0	0	0	0	0	0	0	0	0	1.00012209	0	0	0	0	0	0	0	2.00048844	0	0	0	0	0	0	0	0	0	0	0	0	0	0	0	0	0	0	0	0	0	0	0	0	0	0	0	0	0	0	0
ENSDARG00000005456	0	1.00012209	0	0	0	0	0	0	0	0	0	0	0	0	0	0	0	1.00012209	0	0	0	0	0	0	0	0	0	0	0	0	0	0	0	0	0	0	0	0	0	0	0	0	0	0	0	0	1.00012209	0	0
ENSDARG00000005458	0	0	0	0	0	0	0	2.00048844	0	1.00012209	0	0	0	0	1.00012209	0	0	1.00012209	0	0	0	0	0	0	0	0	0	0	0	0	0	0	1.00012209	0	0	0	1.00012209	0	0	4.001954397	0	0	0	0	0	0	2.00048844	0	0
ENSDARG00000005462	0	0	0	0	0	0	0	0	0	0	0	0	0	0	0	0	0	0	0	0	1.00012209	0	0	0	0	0	0	0	0	0	0	0	0	0	0	0	0	0	0	0	0	0	0	0	0	0	0	0	0
ENSDARG00000005463	3.00109917	0	0	0	0	0	0	2.00048844	0	0	0	0	0	0	0	0	0	1.00012209	0	0	0	0	3.00109917	0	0	0	0	0	0	0	0	1.00012209	0	0	0	0	0	0	0	0	0	0	0	0	0	0	0	0	0
ENSDARG00000005464	7.005988269	0	0	0	0	0	0	1.00012209	0	0	0	0	0	0	0	0	0	1.00012209	0	0	0	0	0	0	0	0	0	0	0	0	0	0	1.00012209	0	0	0	0	0	0	0	0	0	0	0	0	0	3.00109917	0	0
ENSDARG00000005468	0	0	0	0	0	0	0	1.00012209	0	0	0	0	0	0	0	0	0	2.00048844	0	0	0	0	0	0	0	0	0	0	0	0	1.00012209	3.00109917	0	0	1.00012209	0	0	0	0	1.00012209	0	0	0	0	0	0	2.00048844	0	0
ENSDARG00000005476	0	0	0	0	0	0	0	0	0	0	0	0	0	0	0	0	0	0	0	0	0	0	0	0	0	0	0	0	0	0	0	0	0	0	0	0	0	0	0	0	0	0	0	0	0	0	8.007822687	0	0
ENSDARG00000005479	0	0	0	0	0	0	0	0	0	0	0	0	0	0	1.00012209	0	0	12.01761253	0	0	0	0	8.007822687	0	0	0	0	0	0	0	0	2.00048844	0	0	0	0	0	0	0	0	0	0	0	0	0	0	5.003054244	1.00012209	0
ENSDARG00000005481	19.04420413	0	1.00012209	0	0	0	0	1.00012209	0	0	0	1.00012209	1.00012209	0	0	0	0	15.02753306	5.003054244	0	0	0	8.007822687	0	0	0	0	0	0	0	0	0	1.00012209	0	0	0	3.00109917	0	0	0	0	0	0	0	0	0	16.03133162	0	0
ENSDARG00000005482	0	0	0	0	0	0	0	0	0	3.00109917	0	0	0	0	0	0	0	5.003054244	0	0	0	0	1.00012209	0	0	0	0	0	0	0	0	0	0	0	0	0	1.00012209	0	0	0	0	0	0	0	0	0	1.00012209	0	0
ENSDARG00000005500	0	0	0	0	0	0	0	0	0	0	0	0	0	0	0	0	0	0	0	0	0	0	0	0	0	0	0	0	0	0	0	0	0	0	0	0	0	0	0	0	0	0	0	0	0	0	0	0	0
ENSDARG00000005510	0	0	0	0	0	0	0	0	0	0	0	0	0	0	0	0	0	0	0	0	0	0	1.00012209	0	0	0	0	0	0	0	0	0	0	0	0	0	0	0	0	0	0	0	0	0	0	0	0	0	0
ENSDARG00000005513	5.003054244	1.00012209	0	0	0	0	0	0	0	15.02753306	0	1.00012209	0	0	2.00048844	0	0	13.02067364	5.003054244	0	1.00012209	1.00012209	9.009902203	0	2.00048844	0	0	0	0	0	2.00048844	3.00109917	5.003054244	0	3.00109917	0	1.00012209	0	0	7.005988269	0	0	0	0	0	0	15.02753306	0	0
ENSDARG00000005526	0	0	0	0	0	1.00012209	0	0	0	0	0	0	0	0	0	0	0	0	0	0	0	0	0	0	0	0	0	0	0	0	0	0	0	0	0	0	0	0	0	0	0	0	0	0	0	0	0	0	0
ENSDARG00000005536	0	0	0	0	0	0	0	2.00048844	0	0	0	0	0	0	0	0	0	3.00109917	0	0	0	0	0	0	0	0	0	0	0	0	0	0	0	0	1.00012209	0	0	0	0	0	0	0	0	0	0	0	1.00012209	0	0
ENSDARG00000005540	0	0	0	0	0	0	0	0	0	0	0	0	0	0	0	0	0	1.00012209	1.00012209	0	0	0	0	0	0	0	0	0	0	0	0	0	0	0	0	0	0	0	0	0	0	0	0	0	0	0	0	0	0
ENSDARG00000005541	0	0	0	0	0	0	0	0	0	0	0	0	0	0	0	0	0	0	0	0	0	0	0	0	1.00012209	0	0	0	0	0	0	0	0	0	0	0	0	0	0	0	0	0	0	0	0	0	0	0	0
ENSDARG00000005544	0	0	0	0	0	0	0	0	0	0	0	0	0	0	0	0	0	0	0	0	0	0	0	0	0	0	0	0	0	0	0	0	0	0	0	0	0	0	0	0	0	0	0	0	0	0	0	0	0
ENSDARG00000005547	0	0	0	0	0	0	0	0	0	0	0	0	0	0	0	0	0	2.00048844	0	0	0	0	0	0	0	0	0	0	0	0	0	0	0	0	0	0	0	0	0	0	0	0	0	0	0	0	0	0	0
ENSDARG00000005549	0	0	0	0	0	0	0	0	0	0	0	0	0	0	0	0	0	2.00048844	0	0	0	0	0	0	0	0	0	0	0	0	0	0	0	0	0	0	0	0	0	1.00012209	0	0	0	0	0	0	0	0	0
ENSDARG00000005551	0	0	0	0	0	0	0	2.00048844	0	0	0	0	0	0	0	0	0	3.00109917	0	0	0	0	1.00012209	0	1.00012209	0	0	0	0	0	1.00012209	0	0	0	1.00012209	0	0	0	0	0	0	0	0	0	0	0	4.001954397	0	0
ENSDARG00000005560	0	0	0	0	0	0	0	0	0	1.00012209	0	0	0	0	0	0	0	16.03133162	0	0	0	0	0	0	2.00048844	0	0	0	0	0	0	0	0	0	0	0	0	0	0	0	0	0	0	0	0	0	0	0	0
ENSDARG00000005561	0	0	0	0	0	0	0	0	0	1.00012209	0	0	0	0	0	0	0	0	0	0	0	0	0	0	0	0	0	0	0	0	0	0	0	0	0	0	0	0	0	0	0	0	0	0	0	0	1.00012209	0	0
ENSDARG00000005565	0	0	0	0	0	0	0	0	0	0	0	2.00048844	0	0	1.00012209	0	0	0	0	0	0	0	0	0	0	0	0	0	0	0	1.00012209	0	0	0	0	0	0	0	0	0	0	0	0	0	0	0	0	0	0
ENSDARG00000005567	0	1.00012209	0	0	0	0	0	0	0	0	0	0	0	0	1.00012209	0	0	4.001954397	2.00048844	0	0	0	0	0	0	0	0	0	0	0	0	0	2.00048844	0	0	0	2.00048844	0	0	0	0	0	0	0	0	0	2.00048844	0	0
ENSDARG00000005576	0	1.00012209	0	0	0	0	0	1.00012209	0	4.001954397	0	0	0	0	0	0	0	0	1.00012209	0	0	0	2.00048844	0	0	0	0	0	0	0	0	0	0	1.00012209	0	1.00012209	4.001954397	0	0	0	0	0	0	0	0	0	3.00109917	0	0
ENSDARG00000005578	0	0	1.00012209	0	0	0	0	0	0	9.009902203	0	0	0	0	0	0	0	0	1.00012209	0	0	0	1.00012209	0	0	0	0	0	0	0	0	0	0	0	0	0	0	0	0	0	0	0	0	0	0	1.00012209	0	0	0
ENSDARG00000005586	0	0	0	0	0	0	0	1.00012209	0	3.00109917	0	2.00048844	0	0	0	0	0	3.00109917	3.00109917	0	0	0	3.00109917	0	1.00012209	0	0	0	0	0	1.00012209	0	0	0	0	0	0	0	0	1.00012209	0	0	0	0	0	0	0	0	0
ENSDARG00000005590	0	0	0	0	0	0	0	0	0	2.00048844	0	0	0	0	0	0	0	0	0	0	0	0	0	0	0	0	0	0	0	0	0	0	0	0	0	0	0	0	0	0	0	0	0	0	0	0	0	0	0
ENSDARG00000005593	0	0	0	0	0	0	0	2.00048844	0	0	0	0	0	0	0	0	0	1.00012209	0	0	0	0	0	0	0	0	0	0	0	0	0	0	0	0	0	0	0	0	0	0	0	0	0	0	0	0	0	0	0
ENSDARG00000005606	0	0	0	0	0	0	0	0	0	0	0	0	0	0	0	0	0	1.00012209	0	0	0	0	1.00012209	0	0	0	0	0	0	0	1.00012209	0	1.00012209	0	0	0	0	0	0	0	0	0	0	0	0	0	0	0	0
ENSDARG00000005612	0	0	0	0	0	0	0	1.00012209	0	0	0	1.00012209	0	0	0	0	0	5.003054244	0	0	0	0	0	0	0	0	0	0	0	0	0	0	0	0	0	0	0	0	0	0	0	0	0	0	0	0	0	0	0
ENSDARG00000005620	0	0	0	0	0	0	0	1.00012209	0	0	0	1.00012209	0	0	0	0	0	0	0	0	0	0	0	0	0	0	0	0	0	0	0	0	0	0	0	0	0	0	0	0	0	0	0	0	0	0	1.00012209	0	0
ENSDARG00000005625	0	0	0	0	0	0	0	2.00048844	0	0	0	0	0	0	0	0	0	1.00012209	0	0	0	0	0	0	1.00012209	0	0	0	0	0	0	0	0	0	0	0	0	0	0	0	0	0	0	0	0	0	1.00012209	0	0
ENSDARG00000005629	0	0	0	0	0	0	0	0	0	7.005988269	0	0	0	0	0	0	0	0	0	0	0	0	0	0	0	0	1.00012209	0	0	0	0	0	0	0	0	0	0	0	0	0	0	0	0	0	0	0	0	0	0
ENSDARG00000005640	0	0	0	0	0	0	0	0	0	0	0	0	0	0	0	0	0	0	0	0	0	0	0	0	0	0	0	0	0	0	0	0	0	0	0	0	0	0	0	0	0	0	0	0	0	0	0	0	0
ENSDARG00000005642	0	0	0	0	0	0	0	0	0	0	0	0	0	0	0	0	0	0	0	0	0	0	0	0	0	0	0	0	0	0	0	0	1.00012209	0	0	0	0	0	0	0	0	0	0	0	0	0	0	0	0
ENSDARG00000005643	0	0	0	0	0	0	0	0	0	0	0	0	0	0	0	0	0	3.00109917	0	0	0	0	0	0	0	0	0	0	0	0	0	0	0	0	0	0	0	0	0	0	0	0	0	0	0	0	0	0	0
ENSDARG00000005645	0	0	0	0	0	0	1.00012209	0	0	0	0	0	0	0	0	0	0	0	0	0	0	0	0	0	0	0	0	0	0	0	0	0	0	0	0	0	3.00109917	0	0	0	0	0	0	0	0	0	12.01761253	0	0
ENSDARG00000005648	0	0	0	0	0	0	0	0	2.00048844	4.001954397	0	0	0	0	0	0	0	3.00109917	0	0	0	0	0	0	1.00012209	0	0	0	0	0	0	0	0	0	0	0	0	0	0	0	0	0	1.00012209	1.00012209	0	0	0	0	0
ENSDARG00000005651	0	0	0	0	0	0	0	0	0	1.00012209	0	0	0	0	0	0	0	0	0	0	0	0	0	0	2.00048844	0	0	0	0	0	0	0	0	0	0	0	3.00109917	0	0	1.00012209	0	0	0	0	0	0	0	0	0
ENSDARG00000005652	1.00012209	0	0	0	0	0	0	0	0	0	0	0	0	0	0	0	0	0	0	0	0	0	1.00012209	0	0	0	0	0	0	0	1.00012209	0	0	0	0	0	0	0	0	0	0	0	0	0	0	0	1.00012209	0	0
ENSDARG00000005670	0	0	0	0	0	0	0	0	0	0	0	1.00012209	0	0	0	0	0	1.00012209	0	0	0	0	3.00109917	0	0	0	0	0	0	0	0	0	2.00048844	0	1.00012209	0	0	0	0	0	0	0	0	0	0	0	0	0	0
ENSDARG00000005673	0	0	0	0	1.00012209	0	1.00012209	1.00012209	1.00012209	43.22730021	0	5.003054244	0	0	3.00109917	0	0	22.05929444	0	0	0	0	1.00012209	0	4.001954397	0	0	0	0	0	0	10.01222694	0	0	3.00109917	0	0	0	0	5.003054244	0	0	0	0	0	0	14.02398044	0	0
ENSDARG00000005675	0	0	0	0	0	0	0	4.001954397	0	0	0	0	0	0	0	0	0	9.009902203	2.00048844	0	0	0	0	0	0	0	0	0	0	0	1.00012209	2.00048844	0	0	0	0	0	1.00012209	0	4.001954397	0	0	0	0	0	0	8.007822687	0	0
ENSDARG00000005679	1.00012209	0	0	0	0	0	0	0	0	1.00012209	0	0	0	0	0	0	0	0	0	0	0	0	0	0	1.00012209	0	0	0	0	0	0	1.00012209	0	0	1.00012209	0	0	0	0	0	0	0	0	0	0	0	0	0	0
ENSDARG00000005690	0	0	0	0	0	0	0	1.00012209	0	0	0	0	0	0	0	0	0	0	0	0	0	0	0	0	0	0	0	0	0	0	0	1.00012209	0	0	0	0	0	0	0	0	0	0	0	0	0	0	0	0	0
ENSDARG00000005699	0	0	0	0	0	0	0	0	0	0	0	0	0	0	0	0	0	2.00048844	0	0	0	0	0	0	0	0	0	0	0	0	1.00012209	0	0	0	0	0	0	0	0	0	0	0	0	0	0	0	1.00012209	0	0
ENSDARG00000005713	0	0	0	0	0	0	0	0	0	1.00012209	0	0	0	0	0	0	0	1.00012209	0	0	0	0	0	0	1.00012209	0	0	0	0	0	0	0	0	0	0	0	0	0	0	1.00012209	0	1.00012209	0	0	0	0	0	0	0
ENSDARG00000005738	0	0	0	0	0	0	0	0	0	0	0	0	0	0	0	0	0	1.00012209	0	0	0	0	1.00012209	0	0	0	0	0	0	0	0	0	0	0	0	0	0	0	0	0	0	0	0	0	0	0	2.00048844	0	0
ENSDARG00000005739	0	0	0	0	0	0	0	0	0	0	0	0	0	0	0	0	0	0	0	0	0	0	0	0	0	0	0	0	0	0	0	0	0	0	0	0	0	0	0	0	0	0	0	0	0	0	0	0	0
ENSDARG00000005749	0	0	0	0	0	0	0	0	0	3.00109917	0	0	0	0	0	0	0	0	0	0	0	0	0	0	1.00012209	0	0	0	0	0	0	0	0	0	0	0	0	0	0	0	0	0	0	0	0	0	1.00012209	0	0
ENSDARG00000005754	0	0	0	0	0	0	0	0	0	0	0	0	0	0	0	0	0	2.00048844	0	0	0	0	0	0	0	0	0	0	0	0	0	0	0	0	0	0	0	0	0	0	0	0	0	0	0	0	0	0	0
ENSDARG00000005772	0	0	0	0	0	0	0	0	0	0	0	0	0	0	0	0	0	0	0	0	0	0	0	0	0	0	0	0	0	0	1.00012209	0	0	0	0	0	1.00012209	0	0	0	0	0	0	0	0	0	0	0	0
ENSDARG00000005774	1.00012209	0	0	0	0	0	0	2.00048844	0	0	0	0	0	0	0	0	0	6.004398828	2.00048844	0	0	1.00012209	3.00109917	0	0	0	0	0	0	0	0	2.00048844	1.00012209	0	1.00012209	0	2.00048844	0	0	0	0	1.00012209	0	0	0	0	11.01479701	0	0
ENSDARG00000005780	0	0	0	0	0	0	0	0	0	0	0	0	0	0	0	0	0	0	0	0	0	0	0	0	0	0	0	0	0	0	0	0	0	0	0	0	0	0	0	0	0	0	0	0	0	0	0	0	0
ENSDARG00000005786	0	0	0	0	0	0	0	0	0	0	0	0	0	0	0	0	0	0	0	0	0	0	0	0	0	0	0	0	0	0	0	0	0	0	0	0	0	0	0	0	0	0	0	0	0	0	0	0	0
ENSDARG00000005789	2.00048844	0	0	0	0	0	2.00048844	8.007822687	0	0	0	0	0	0	0	0	0	0	0	0	0	0	0	0	0	0	0	0	0	0	0	0	0	0	0	0	0	0	0	0	0	0	0	0	0	0	0	0	0
ENSDARG00000005791	9.009902203	4.001954397	0	1.00012209	0	2.00048844	3.00109917	14.02398044	1.00012209	34.14189908	0	8.007822687	1.00012209	0	11.01479701	0	0	37.16812751	8.007822687	0	0	1.00012209	24.07058837	0	5.003054244	0	0	0	0	0	10.01222694	5.003054244	7.005988269	1.00012209	8.007822687	1.00012209	9.009902203	0	0	16.03133162	0	0	0	0	0	0	56.38633785	1.00012209	0
ENSDARG00000005799	0	0	0	0	0	0	0	1.00012209	0	2.00048844	0	1.00012209	0	0	1.00012209	0	0	5.003054244	0	0	0	0	3.00109917	0	0	0	0	0	0	1.00012209	0	1.00012209	1.00012209	0	1.00012209	0	0	0	0	0	0	0	0	0	0	0	3.00109917	0	0
ENSDARG00000005800	0	0	0	0	0	0	0	0	0	0	0	0	0	0	0	0	0	0	0	0	0	0	1.00012209	0	0	0	0	0	1.00012209	0	0	0	0	0	0	0	0	0	0	1.00012209	0	0	0	0	0	0	0	0	0
ENSDARG00000005821	0	0	0	0	0	0	0	2.00048844	0	0	0	0	0	0	0	0	0	0	0	0	0	0	0	0	0	0	0	0	0	0	0	0	0	0	0	0	0	0	0	0	0	0	0	0	0	0	0	0	0
ENSDARG00000005823	0	0	0	0	0	0	0	0	0	1.00012209	0	0	0	0	0	0	0	0	0	0	0	0	0	0	0	0	0	0	0	0	0	1.00012209	0	0	0	0	0	0	0	1.00012209	0	0	0	0	0	0	0	0	0
ENSDARG00000005827	0	0	0	0	0	0	0	0	0	0	0	0	0	0	0	0	0	1.00012209	1.00012209	0	0	0	2.00048844	0	0	0	0	0	0	0	2.00048844	0	0	0	2.00048844	0	3.00109917	0	0	1.00012209	0	0	0	0	0	0	2.00048844	0	0
ENSDARG00000005832	0	0	0	0	0	0	0	0	0	0	0	0	0	0	0	0	0	0	0	0	0	0	0	0	0	0	0	0	0	0	0	0	0	0	0	0	0	0	0	0	0	0	0	0	0	0	0	0	0
ENSDARG00000005834	0	0	0	0	0	0	0	1.00012209	0	3.00109917	0	0	0	1.00012209	1.00012209	0	0	2.00048844	0	0	0	0	1.00012209	0	1.00012209	0	0	0	0	0	0	0	0	0	0	0	0	0	0	2.00048844	0	2.00048844	0	1.00012209	0	0	0	0	0
ENSDARG00000005840	0	0	0	0	0	0	0	2.00048844	0	0	0	2.00048844	0	0	1.00012209	0	1.00012209	5.003054244	0	0	0	0	2.00048844	0	2.00048844	0	0	0	0	0	0	0	0	0	0	0	0	0	0	0	0	0	0	0	0	0	1.00012209	0	0
ENSDARG00000005841	1.00012209	0	0	0	0	0	1.00012209	0	0	2.00048844	0	0	0	0	2.00048844	0	0	4.001954397	2.00048844	1.00012209	0	0	7.005988269	0	0	0	0	0	0	0	0	1.00012209	2.00048844	0	1.00012209	0	0	0	0	0	1.00012209	0	0	0	0	0	8.007822687	0	0
ENSDARG00000005842	1.00012209	0	0	0	0	0	0	0	0	9.009902203	0	1.00012209	0	0	0	0	0	2.00048844	1.00012209	0	0	0	1.00012209	0	0	0	0	0	0	2.00048844	2.00048844	0	1.00012209	0	0	0	0	0	0	0	0	1.00012209	0	0	0	0	1.00012209	0	0
ENSDARG00000005861	0	0	0	0	0	0	0	0	0	0	0	0	0	0	0	0	0	0	2.00048844	0	0	0	4.001954397	0	0	0	0	0	0	0	1.00012209	0	0	0	0	0	2.00048844	0	0	0	0	0	0	0	0	0	14.02398044	0	0
ENSDARG00000005867	0	0	0	0	0	0	0	0	0	0	0	0	0	0	0	0	0	2.00048844	0	0	0	0	0	0	0	0	0	0	0	0	0	0	0	0	0	0	0	0	0	0	0	0	0	0	0	0	0	0	0
ENSDARG00000005870	0	0	0	0	0	0	0	0	0	5.003054244	0	0	0	1.00012209	0	0	0	0	0	0	0	0	0	0	1.00012209	0	0	0	0	0	0	0	0	0	0	0	0	0	0	0	0	0	0	0	0	0	0	0	0
ENSDARG00000005872	0	0	0	0	0	0	0	0	0	0	0	0	0	0	0	0	0	0	0	0	0	0	2.00048844	0	0	0	0	0	0	0	0	0	0	0	3.00109917	0	1.00012209	0	0	0	0	0	0	0	0	0	3.00109917	0	0
ENSDARG00000005883	0	0	0	0	0	0	0	0	0	0	0	0	0	0	0	0	0	0	0	0	0	0	0	0	0	0	0	0	0	0	0	0	0	0	0	0	0	0	0	0	0	0	0	0	0	0	0	0	0
ENSDARG00000005887	0	0	0	0	0	0	0	0	0	0	0	0	0	0	0	0	0	0	0	0	0	0	0	0	0	0	0	0	0	0	0	0	1.00012209	0	0	0	0	0	0	0	0	0	0	0	0	0	0	0	0
ENSDARG00000005891	0	0	0	0	0	0	0	0	0	3.00109917	0	0	0	0	1.00012209	0	0	0	1.00012209	0	0	0	1.00012209	0	1.00012209	0	0	0	0	3.00109917	0	1.00012209	0	1.00012209	3.00109917	0	0	0	0	1.00012209	0	1.00012209	0	0	0	0	1.00012209	0	0
ENSDARG00000005894	0	1.00012209	0	0	0	0	0	0	0	0	0	0	0	0	0	0	0	0	0	0	0	0	0	0	0	0	0	0	0	0	1.00012209	0	1.00012209	0	0	0	0	0	0	0	0	0	0	0	0	0	0	0	0
ENSDARG00000005897	0	0	0	0	0	0	0	0	0	1.00012209	0	1.00012209	0	0	0	0	0	1.00012209	0	0	0	1.00012209	1.00012209	0	0	0	0	0	0	0	0	0	0	2.00048844	0	0	0	0	0	0	0	0	0	0	0	0	0	0	0
ENSDARG00000005901	0	0	0	0	0	0	0	0	0	1.00012209	0	0	0	0	0	0	0	0	0	0	0	0	0	0	0	0	0	0	0	0	0	0	0	0	0	0	0	0	0	0	0	0	0	0	0	0	0	0	0
ENSDARG00000005908	0	0	0	0	0	0	0	0	0	0	0	0	0	0	0	0	0	3.00109917	1.00012209	0	0	0	1.00012209	0	0	0	0	0	0	0	0	1.00012209	0	0	0	0	0	0	0	0	0	0	0	0	0	0	0	0	0
ENSDARG00000005913	0	0	0	0	0	0	0	0	0	0	0	0	0	0	0	0	0	0	0	0	0	0	0	0	0	0	0	0	0	0	0	0	0	0	0	0	0	0	0	0	0	0	0	0	0	0	0	0	0
ENSDARG00000005915	0	0	0	0	0	0	0	0	0	0	0	0	0	0	0	0	0	0	0	0	0	0	0	0	0	0	0	0	0	0	0	0	0	0	0	0	0	0	0	0	0	0	0	0	0	0	0	0	0
ENSDARG00000005916	0	0	0	0	1.00012209	0	0	0	0	1.00012209	0	0	0	0	0	0	0	0	0	0	0	0	0	0	0	0	0	0	0	0	0	0	0	0	0	0	0	0	0	0	0	0	0	0	0	0	0	0	0
ENSDARG00000005924	0	3.00109917	0	0	0	0	0	0	0	13.02067364	0	0	0	0	1.00012209	0	0	13.02067364	6.004398828	0	0	1.00012209	6.004398828	0	0	0	0	0	0	4.001954397	2.00048844	7.005988269	3.00109917	2.00048844	1.00012209	0	2.00048844	0	0	0	0	2.00048844	0	0	0	0	5.003054244	0	0
ENSDARG00000005926	3.00109917	0	0	0	0	0	0	1.00012209	0	1.00012209	0	0	0	0	1.00012209	0	0	6.004398828	0	0	0	0	0	0	0	0	0	0	0	0	0	0	0	0	1.00012209	0	0	0	0	2.00048844	0	0	0	0	0	0	6.004398828	0	0
ENSDARG00000005927	0	0	0	0	0	0	0	1.00012209	0	6.004398828	0	0	0	0	0	0	0	0	2.00048844	0	0	0	0	0	0	0	0	0	0	0	0	0	0	1.00012209	3.00109917	0	1.00012209	0	0	0	0	0	0	0	0	0	2.00048844	0	0
ENSDARG00000005941	1.00012209	0	0	0	0	0	2.00048844	1.00012209	0	0	1.00012209	0	0	0	1.00012209	0	0	4.001954397	0	0	0	0	0	0	0	0	0	0	0	0	0	0	2.00048844	0	0	0	0	0	0	0	0	0	0	0	0	0	4.001954397	0	0
ENSDARG00000005944	0	0	0	0	0	1.00012209	0	1.00012209	0	0	0	0	0	0	0	0	0	1.00012209	0	0	0	0	0	0	0	0	0	0	0	0	0	0	0	0	0	0	0	0	0	0	0	0	0	0	0	0	0	0	0
ENSDARG00000005945	0	0	0	0	0	0	0	0	0	0	0	0	0	0	0	0	0	2.00048844	1.00012209	0	0	0	0	0	0	0	0	0	0	0	0	1.00012209	0	0	1.00012209	0	0	0	0	0	0	0	0	0	0	0	0	0	0
ENSDARG00000005947	0	0	0	0	0	0	0	0	0	0	0	0	0	0	0	0	0	1.00012209	0	0	0	0	0	0	0	0	0	0	0	0	0	0	0	0	0	0	0	0	0	0	0	0	0	0	0	0	0	0	0
ENSDARG00000005948	0	0	0	0	0	0	0	0	0	0	0	0	0	0	0	0	0	0	0	0	0	0	0	0	0	0	0	0	0	0	0	0	0	0	0	0	0	0	0	0	0	0	0	0	0	0	1.00012209	0	0
ENSDARG00000005959	0	0	0	0	0	0	0	0	0	0	0	0	0	0	0	0	0	2.00048844	0	0	0	0	0	0	0	0	0	0	0	0	0	0	0	0	0	0	0	0	0	0	0	0	0	0	0	0	0	0	0
ENSDARG00000005972	0	0	0	0	0	0	0	0	0	1.00012209	0	0	0	0	0	0	0	0	0	0	0	0	1.00012209	0	0	0	0	0	0	0	0	0	0	0	0	0	1.00012209	0	0	0	0	0	0	0	0	0	1.00012209	0	0
ENSDARG00000005980	0	0	0	0	0	0	0	0	0	1.00012209	0	0	0	0	0	0	0	0	1.00012209	0	0	0	0	0	0	0	0	0	0	0	0	0	0	0	0	0	0	0	0	0	0	0	0	0	0	0	1.00012209	0	0
ENSDARG00000005989	0	1.00012209	0	0	0	0	0	0	2.00048844	0	0	0	0	0	1.00012209	0	0	3.00109917	0	0	0	0	3.00109917	0	0	0	0	0	0	0	6.004398828	7.005988269	2.00048844	0	0	0	3.00109917	0	0	0	0	0	0	0	0	0	5.003054244	0	0
ENSDARG00000005993	0	0	0	0	0	0	0	0	0	0	0	0	0	0	0	0	0	0	0	0	0	0	0	0	0	0	0	0	0	0	0	0	0	0	0	0	0	0	0	0	0	0	0	0	0	0	1.00012209	0	0
ENSDARG00000006003	0	0	0	0	0	0	0	0	0	0	0	0	0	0	0	0	0	0	0	0	0	0	0	0	0	0	0	0	0	0	0	0	0	0	0	0	0	0	0	0	0	0	0	0	0	0	0	0	0
ENSDARG00000006005	0	0	0	0	0	0	0	0	0	1.00012209	0	0	0	0	0	0	0	0	0	0	0	0	0	0	0	0	0	0	0	1.00012209	0	0	0	0	0	0	0	0	0	0	0	0	0	0	0	0	0	0	0
ENSDARG00000006010	0	0	0	0	0	0	0	0	0	1.00012209	0	0	0	0	0	0	0	2.00048844	0	0	0	0	0	0	0	0	0	0	0	0	0	0	0	0	0	0	0	0	0	0	0	0	0	0	0	0	0	0	0
ENSDARG00000006011	0	0	0	0	0	0	0	0	0	0	0	0	0	0	0	0	0	0	0	0	0	0	0	0	0	0	0	0	0	0	0	1.00012209	0	0	0	0	0	0	0	0	0	0	0	0	0	0	0	0	0
ENSDARG00000006017	0	0	0	0	0	0	0	0	0	0	0	0	0	0	0	0	0	0	0	0	0	0	0	0	0	0	0	0	0	0	0	0	0	0	0	0	0	0	0	0	0	0	0	0	0	0	0	0	0
ENSDARG00000006019	0	1.00012209	0	0	0	0	0	0	0	1.00012209	0	0	0	0	0	0	0	2.00048844	1.00012209	0	0	0	1.00012209	0	0	0	0	0	0	0	0	0	2.00048844	0	0	0	0	0	0	1.00012209	0	0	0	0	0	0	6.004398828	0	0
ENSDARG00000006021	0	0	0	0	0	0	0	0	0	2.00048844	0	0	0	0	0	0	0	0	0	0	0	0	0	0	0	0	0	0	0	0	1.00012209	0	0	0	0	0	0	0	0	0	0	0	0	0	0	0	0	0	0
ENSDARG00000006025	0	0	0	0	0	0	0	1.00012209	0	0	0	0	0	0	0	0	0	0	0	0	0	0	0	0	0	0	0	0	0	0	0	0	0	0	0	0	0	0	0	0	0	0	0	0	0	0	0	0	0
ENSDARG00000006029	1.00012209	0	0	0	0	0	0	1.00012209	0	0	0	0	0	0	0	0	0	0	0	0	0	0	0	0	0	0	0	0	0	0	0	0	0	0	0	0	0	0	0	0	0	0	0	0	0	0	3.00109917	0	0
ENSDARG00000006031	0	0	0	0	0	0	0	0	0	0	0	2.00048844	0	0	0	0	0	3.00109917	0	0	0	0	0	0	0	0	0	0	0	0	0	0	0	0	0	0	0	0	0	1.00012209	0	1.00012209	0	0	0	0	0	0	0
ENSDARG00000006038	0	0	0	1.00012209	0	0	0	2.00048844	0	0	0	0	0	0	0	0	0	0	0	0	0	0	0	0	0	0	0	0	0	0	0	0	1.00012209	0	0	0	0	0	0	0	0	0	0	2.00048844	0	0	0	0	0
ENSDARG00000006040	1.00012209	0	0	0	0	0	0	0	0	0	0	0	0	0	0	0	0	2.00048844	0	0	0	0	0	0	0	0	0	0	0	0	1.00012209	0	1.00012209	0	0	0	2.00048844	0	0	0	0	0	0	0	0	0	1.00012209	0	0
ENSDARG00000006044	0	0	0	0	0	0	0	0	0	0	0	0	0	0	0	0	0	0	0	0	0	0	0	0	0	0	0	0	0	0	0	0	0	0	1.00012209	0	0	0	0	0	0	0	0	0	0	0	0	0	0
ENSDARG00000006052	0	0	0	0	0	0	0	1.00012209	0	0	0	0	0	0	0	0	0	0	0	0	0	0	0	0	0	0	0	0	0	0	0	0	0	0	0	0	0	0	0	0	0	0	0	0	0	0	0	0	0
ENSDARG00000006060	0	0	0	0	0	0	0	0	0	0	0	0	0	0	0	0	0	0	0	0	0	0	2.00048844	0	0	0	0	0	0	0	0	0	0	0	0	0	0	0	0	0	0	0	0	0	0	0	0	0	0
ENSDARG00000006062	0	0	0	0	0	0	0	0	0	1.00012209	0	0	0	0	0	0	0	1.00012209	0	0	0	0	0	0	0	0	0	0	0	0	0	0	0	0	0	0	0	0	0	2.00048844	0	0	0	0	0	0	0	0	0
ENSDARG00000006065	0	0	0	0	0	0	0	0	0	0	0	0	0	0	0	0	0	0	0	0	0	0	0	0	0	0	0	0	0	0	0	0	0	0	0	0	0	0	0	0	0	0	0	0	0	0	0	0	0
ENSDARG00000006074	0	0	0	0	0	0	0	4.001954397	0	0	0	0	0	0	0	0	0	0	1.00012209	0	0	0	0	0	0	0	0	0	0	0	1.00012209	0	0	0	0	0	0	0	0	0	0	0	0	0	0	0	2.00048844	0	0
ENSDARG00000006079	0	0	0	0	0	0	0	0	0	0	0	0	0	0	0	0	0	0	0	0	0	0	0	0	0	0	0	0	0	0	0	0	0	0	0	0	0	0	0	0	0	0	0	0	0	0	0	0	0
ENSDARG00000006092	0	0	0	0	0	0	0	0	0	0	0	0	0	0	0	0	0	1.00012209	0	0	0	0	0	0	0	0	0	0	0	0	0	0	0	0	0	0	0	0	0	0	0	0	0	0	0	0	0	0	0
ENSDARG00000006093	0	0	0	0	0	0	0	0	0	0	0	0	0	0	0	0	0	0	1.00012209	0	0	0	0	0	0	0	0	0	0	0	0	0	0	0	0	0	0	0	0	0	0	0	0	0	0	0	0	0	0
ENSDARG00000006094	1.00012209	0	0	0	0	0	0	3.00109917	1.00012209	11.01479701	1.00012209	0	0	0	0	0	0	2.00048844	0	0	0	0	0	0	0	0	0	0	0	0	0	0	0	0	0	0	0	0	0	1.00012209	0	0	0	0	0	0	2.00048844	0	0
ENSDARG00000006110	0	0	0	0	0	0	0	0	0	0	0	0	0	0	0	0	0	1.00012209	0	0	0	0	0	0	0	0	0	0	0	0	0	0	0	0	0	0	0	0	0	0	0	0	0	0	0	0	0	0	0
ENSDARG00000006112	0	0	0	0	0	0	0	0	0	0	0	0	0	0	0	0	0	1.00012209	0	0	0	0	1.00012209	0	0	0	0	0	0	0	0	0	0	0	0	0	0	0	0	2.00048844	0	0	0	0	0	0	0	0	0
ENSDARG00000006120	0	0	0	0	0	0	0	1.00012209	0	0	0	0	0	0	0	0	0	2.00048844	0	0	0	0	0	0	0	0	0	0	0	0	0	0	0	0	0	0	0	0	0	2.00048844	0	0	0	0	0	0	0	0	0
ENSDARG00000006124	1.00012209	0	0	0	0	0	0	1.00012209	0	2.00048844	0	0	0	0	1.00012209	0	0	10.01222694	1.00012209	0	0	0	2.00048844	0	0	0	0	0	0	0	0	0	0	0	0	0	1.00012209	0	0	2.00048844	0	2.00048844	0	0	0	0	5.003054244	0	0
ENSDARG00000006125	0	0	0	0	0	0	0	1.00012209	0	3.00109917	0	0	0	0	0	0	0	1.00012209	1.00012209	0	0	0	0	0	0	0	0	0	0	0	1.00012209	0	0	0	3.00109917	0	3.00109917	0	0	1.00012209	0	0	0	0	0	0	6.004398828	0	0
ENSDARG00000006128	0	0	0	0	0	0	0	0	0	0	0	0	0	0	0	0	0	2.00048844	0	0	0	0	0	0	0	0	0	0	0	0	0	0	0	0	0	0	0	0	0	0	0	0	0	0	0	0	0	0	0
ENSDARG00000006145	0	0	0	0	0	0	0	0	0	0	0	0	0	0	0	0	0	0	0	0	0	0	0	0	0	0	0	0	0	0	0	0	0	0	0	0	0	0	0	0	0	0	0	0	0	0	0	0	0
ENSDARG00000006169	0	0	0	0	0	0	0	0	0	0	0	0	0	0	0	0	0	0	0	0	0	0	0	0	0	0	0	0	0	0	0	0	0	0	0	0	0	0	0	0	0	0	0	0	0	0	2.00048844	0	0
ENSDARG00000006181	0	1.00012209	0	0	0	0	0	0	0	0	0	0	0	0	0	0	0	0	0	0	0	0	0	0	0	0	0	0	0	0	0	0	0	0	0	0	0	0	0	0	0	1.00012209	0	0	0	0	6.004398828	0	0
ENSDARG00000006192	0	1.00012209	0	0	0	0	0	2.00048844	0	0	0	0	0	0	0	0	0	3.00109917	0	0	0	0	0	0	0	0	0	0	0	0	0	0	0	0	0	0	1.00012209	0	0	0	0	0	0	0	0	0	2.00048844	0	0
ENSDARG00000006196	0	0	0	0	0	0	0	1.00012209	0	1.00012209	0	0	0	0	0	0	0	3.00109917	0	0	0	0	0	0	0	0	0	0	0	0	1.00012209	3.00109917	0	0	0	0	0	0	0	2.00048844	0	0	0	0	0	0	3.00109917	0	0
ENSDARG00000006200	1.00012209	0	0	0	0	0	0	3.00109917	0	3.00109917	0	1.00012209	0	0	0	0	0	16.03133162	2.00048844	0	0	0	6.004398828	0	0	0	0	0	0	1.00012209	1.00012209	0	0	0	1.00012209	0	0	0	0	0	0	1.00012209	0	0	0	0	6.004398828	0	0
ENSDARG00000006207	0	0	0	0	0	0	0	0	0	0	0	0	0	0	0	0	0	0	0	0	0	0	0	0	0	0	0	0	0	0	0	0	0	0	0	0	0	0	0	0	0	0	0	0	0	0	1.00012209	0	0
ENSDARG00000006212	0	0	0	0	0	0	0	0	0	0	0	0	0	0	0	0	0	0	0	0	0	0	1.00012209	0	0	0	0	0	0	0	0	0	0	0	0	0	0	0	0	0	0	0	0	0	0	0	0	0	0
ENSDARG00000006215	0	0	0	0	0	0	0	0	0	0	0	0	0	0	0	0	0	0	0	0	0	0	0	0	0	0	0	0	0	0	0	0	0	0	0	0	0	0	0	0	0	0	0	0	0	0	0	0	0
ENSDARG00000006219	0	0	0	0	0	0	0	0	0	0	0	0	0	0	0	1.00012209	0	2.00048844	0	0	0	0	6.004398828	0	0	0	0	0	0	0	0	0	0	0	0	0	0	0	0	0	0	0	0	0	0	0	2.00048844	0	0
ENSDARG00000006220	0	0	0	0	0	0	0	0	0	0	0	0	0	0	0	0	0	0	0	0	0	0	0	0	0	0	0	0	0	0	0	0	0	0	0	0	0	0	0	0	0	0	0	0	0	0	0	0	0
ENSDARG00000006225	0	0	0	0	0	0	0	2.00048844	0	0	0	1.00012209	0	0	0	0	0	3.00109917	0	0	0	0	2.00048844	0	0	0	0	0	0	0	0	0	1.00012209	0	0	0	0	0	0	0	0	0	0	0	0	0	0	0	0
ENSDARG00000006235	2.00048844	0	0	0	0	0	0	0	0	0	0	0	0	0	0	0	0	1.00012209	0	0	0	0	1.00012209	0	0	0	0	0	0	0	0	0	0	0	0	0	0	0	0	0	0	0	0	0	0	0	0	0	0
ENSDARG00000006240	0	0	0	0	0	0	0	0	0	3.00109917	0	0	0	0	0	0	0	0	0	0	0	0	1.00012209	0	0	0	0	0	0	0	0	0	2.00048844	0	0	0	0	0	0	0	0	0	0	0	0	0	1.00012209	0	0
ENSDARG00000006242	1.00012209	0	0	0	0	0	0	1.00012209	0	3.00109917	0	1.00012209	0	0	1.00012209	0	0	1.00012209	0	0	0	0	0	0	0	0	0	0	0	0	1.00012209	0	0	0	0	0	0	0	0	1.00012209	0	0	0	0	0	0	2.00048844	0	0
ENSDARG00000006251	0	0	0	0	0	0	0	0	0	1.00012209	0	0	1.00012209	0	0	0	0	1.00012209	0	0	0	0	1.00012209	0	0	0	0	0	0	0	0	0	0	0	0	0	2.00048844	0	0	0	0	0	0	0	0	0	1.00012209	0	0
ENSDARG00000006253	0	0	0	0	0	0	0	0	0	0	0	0	0	0	0	0	0	0	0	0	0	0	0	0	0	0	0	0	0	0	0	0	0	0	0	0	0	0	0	0	0	0	0	0	0	0	0	0	0
ENSDARG00000006257	0	0	0	0	0	0	0	0	0	2.00048844	0	0	0	0	0	0	0	0	0	0	0	0	0	0	0	0	0	0	0	0	0	0	0	0	0	0	0	0	0	0	0	0	0	0	0	0	0	0	0
ENSDARG00000006260	3.00109917	2.00048844	1.00012209	0	0	0	0	7.005988269	0	2.00048844	0	2.00048844	1.00012209	0	3.00109917	0	0	79.77178055	12.01761253	1.00012209	0	0	48.28346676	0	1.00012209	0	0	0	0	1.00012209	15.02753306	6.004398828	21.05401772	0	6.004398828	0	18.03966704	0	0	12.01761253	0	0	0	1.00012209	0	0	55.37260192	0	0
ENSDARG00000006266	4.001954397	1.00012209	0	0	0	0	1.00012209	3.00109917	0	8.007822687	0	12.01761253	0	0	4.001954397	0	0	0	6.004398828	0	0	3.00109917	4.001954397	0	0	0	0	0	0	0	1.00012209	4.001954397	3.00109917	0	0	0	0	0	0	8.007822687	0	0	0	0	0	0	13.02067364	1.00012209	0
ENSDARG00000006272	0	0	0	0	0	0	0	2.00048844	0	1.00012209	0	0	0	0	0	0	0	0	1.00012209	0	0	0	0	0	0	0	0	0	0	0	0	0	0	0	0	0	0	0	0	0	0	0	0	0	0	0	1.00012209	0	0
ENSDARG00000006275	0	1.00012209	0	0	0	0	1.00012209	1.00012209	1.00012209	3.00109917	0	1.00012209	0	0	0	0	0	3.00109917	0	0	0	0	0	0	0	0	0	0	0	0	3.00109917	0	2.00048844	0	0	0	1.00012209	0	0	0	0	2.00048844	0	0	0	0	2.00048844	0	0
ENSDARG00000006279	0	0	0	0	0	0	0	0	0	0	0	0	0	0	0	0	0	0	0	0	0	0	0	0	0	0	0	0	0	0	0	0	0	0	0	0	0	0	0	0	0	0	0	0	0	0	0	0	0
ENSDARG00000006283	0	0	0	0	0	0	0	0	0	1.00012209	0	0	0	0	1.00012209	0	0	2.00048844	0	0	0	0	0	0	0	0	0	0	0	0	0	2.00048844	0	0	0	0	1.00012209	0	0	0	0	0	0	0	0	0	0	0	0
ENSDARG00000006288	0	0	0	0	0	0	0	0	0	0	0	0	0	0	0	0	0	1.00012209	0	0	0	0	0	0	0	0	0	0	0	0	0	0	1.00012209	0	0	0	0	0	0	0	0	0	0	0	0	0	0	0	0
ENSDARG00000006290	1.00012209	1.00012209	0	0	0	0	0	3.00109917	0	16.03133162	0	2.00048844	0	0	0	0	0	2.00048844	0	0	0	0	1.00012209	0	0	0	0	0	0	0	0	1.00012209	1.00012209	0	2.00048844	0	0	0	0	0	0	0	0	0	1.00012209	0	4.001954397	0	0
ENSDARG00000006300	0	0	0	0	0	0	0	0	0	2.00048844	0	0	0	0	0	0	0	2.00048844	0	0	0	0	1.00012209	0	0	0	0	0	0	0	0	0	0	0	0	0	0	0	0	0	0	0	0	0	0	0	1.00012209	0	0
ENSDARG00000006301	0	0	0	0	0	0	1.00012209	0	0	1.00012209	0	0	0	0	0	0	0	0	0	0	0	0	0	0	0	0	0	0	0	0	0	0	0	0	0	0	0	0	0	0	0	0	0	0	0	0	0	0	0
ENSDARG00000006307	0	0	0	0	0	0	0	0	0	0	0	0	0	0	0	0	0	0	0	0	0	0	0	0	0	0	0	0	0	2.00048844	0	0	0	0	1.00012209	0	0	0	0	0	0	0	0	0	0	0	0	0	0
ENSDARG00000006314	2.00048844	0	0	0	0	0	0	3.00109917	0	2.00048844	0	0	0	0	0	0	0	10.01222694	1.00012209	0	0	0	0	0	0	0	0	0	0	0	0	1.00012209	0	0	0	0	1.00012209	0	0	1.00012209	0	0	0	0	0	0	2.00048844	0	0
ENSDARG00000006316	14.02398044	3.00109917	2.00048844	1.00012209	0	0	1.00012209	15.02753306	0	41.2065799	0	4.001954397	1.00012209	1.00012209	6.004398828	0	0	47.27173401	11.01479701	0	0	0	38.17736738	0	8.007822687	0	0	0	0	2.00048844	11.01479701	2.00048844	17.03537624	0	5.003054244	2.00048844	3.00109917	0	1.00012209	12.01761253	0	1.00012209	0	0	0	0	41.2065799	0	0
ENSDARG00000006331	0	0	0	0	0	0	0	0	0	0	0	0	0	0	0	0	0	0	0	0	0	0	0	0	0	0	0	0	0	0	0	0	1.00012209	0	0	0	0	0	0	0	0	0	0	0	0	0	0	0	0
ENSDARG00000006332	0	0	0	0	0	0	0	1.00012209	0	0	0	0	0	0	1.00012209	0	0	0	0	0	0	0	0	0	0	0	0	0	0	1.00012209	0	0	0	0	0	0	0	0	0	0	0	0	0	0	0	0	1.00012209	0	0
ENSDARG00000006345	0	0	0	0	0	0	0	0	0	0	0	0	0	0	0	0	0	0	0	0	0	0	0	0	0	0	0	0	0	0	0	0	0	0	0	0	0	0	0	0	0	0	0	0	0	0	1.00012209	0	0
ENSDARG00000006353	0	0	1.00012209	1.00012209	0	1.00012209	1.00012209	3.00109917	0	4.001954397	0	0	0	0	2.00048844	0	0	6.004398828	5.003054244	0	0	0	0	0	1.00012209	0	1.00012209	0	0	1.00012209	3.00109917	1.00012209	0	0	2.00048844	1.00012209	2.00048844	0	0	3.00109917	0	2.00048844	0	0	0	0	20.04898766	0	0
ENSDARG00000006370	1.00012209	0	0	0	0	0	0	7.005988269	0	0	0	0	0	0	0	0	0	2.00048844	0	0	0	0	0	0	0	0	0	0	0	0	0	0	0	0	0	0	0	0	0	0	0	0	0	0	0	0	0	0	0
ENSDARG00000006372	0	0	0	0	0	0	0	0	0	0	0	0	0	0	0	0	0	1.00012209	1.00012209	0	0	0	0	0	0	0	0	0	0	0	0	1.00012209	0	0	0	0	1.00012209	0	0	0	0	0	0	0	0	0	1.00012209	0	0
ENSDARG00000006385	1.00012209	0	0	0	0	0	0	0	0	0	0	0	0	0	0	0	0	1.00012209	0	0	0	0	1.00012209	0	0	0	0	0	0	0	0	0	0	0	0	0	0	0	0	0	0	0	0	0	0	0	1.00012209	0	0
ENSDARG00000006389	0	0	0	0	0	0	0	0	0	0	0	0	0	0	0	0	0	0	0	0	0	0	0	0	0	0	0	0	0	0	0	0	0	0	0	0	0	0	0	0	0	0	0	0	0	0	1.00012209	0	0
ENSDARG00000006392	0	0	0	0	0	0	0	0	0	0	0	0	0	0	0	0	0	1.00012209	0	0	0	0	1.00012209	0	0	0	0	0	0	0	0	0	0	0	0	0	0	0	0	0	0	0	0	0	0	0	0	0	0
ENSDARG00000006394	0	0	0	0	0	0	0	0	0	0	0	1.00012209	0	0	0	0	0	1.00012209	0	0	0	0	0	0	0	0	0	0	0	0	0	0	0	0	0	0	0	0	0	0	0	0	0	0	0	0	0	0	0
ENSDARG00000006395	0	2.00048844	0	0	0	0	0	1.00012209	0	0	0	0	0	0	0	0	0	1.00012209	0	0	0	0	1.00012209	0	0	0	0	0	0	0	0	0	0	2.00048844	1.00012209	0	0	0	0	0	0	0	0	1.00012209	0	0	0	0	0
ENSDARG00000006396	0	0	0	0	0	0	0	0	0	0	0	0	0	0	0	0	0	3.00109917	0	0	0	0	0	0	0	0	0	0	0	0	0	0	0	0	0	0	0	0	0	0	0	0	0	0	0	0	0	0	0
ENSDARG00000006397	4.001954397	0	0	0	0	2.00048844	0	3.00109917	0	3.00109917	0	1.00012209	0	0	1.00012209	0	0	5.003054244	1.00012209	0	0	0	0	0	0	1.00012209	0	0	0	0	4.001954397	1.00012209	0	0	1.00012209	0	1.00012209	0	0	1.00012209	0	0	0	0	0	0	7.005988269	1.00012209	0
ENSDARG00000006399	1.00012209	1.00012209	0	0	0	0	0	4.001954397	1.00012209	6.004398828	0	0	0	0	1.00012209	0	0	13.02067364	2.00048844	0	0	0	5.003054244	0	1.00012209	0	0	1.00012209	0	0	0	1.00012209	3.00109917	3.00109917	2.00048844	0	1.00012209	0	0	3.00109917	0	0	0	0	0	0	4.001954397	0	0
ENSDARG00000006408	0	0	0	0	0	0	0	0	0	1.00012209	0	0	0	0	0	0	0	1.00012209	0	0	0	0	0	0	1.00012209	0	0	0	0	0	0	0	0	0	0	0	0	0	0	0	0	0	0	0	0	0	0	0	0
ENSDARG00000006413	17.03537624	2.00048844	1.00012209	1.00012209	0	0	5.003054244	12.01761253	0	24.07058837	1.00012209	7.005988269	0	1.00012209	4.001954397	0	0	40.19659345	8.007822687	0	0	1.00012209	21.05401772	1.00012209	4.001954397	0	0	0	1.00012209	0	18.03966704	4.001954397	17.03537624	0	5.003054244	0	11.01479701	0	0	24.07058837	0	0	0	0	0	2.00048844	42.21681544	0	1.00012209
ENSDARG00000006420	0	0	0	0	0	0	0	0	0	0	0	0	0	0	1.00012209	0	0	6.004398828	0	0	0	0	0	0	0	0	0	0	0	1.00012209	3.00109917	0	0	0	0	0	0	0	0	0	0	0	0	0	0	0	0	0	0
ENSDARG00000006434	0	0	0	0	0	0	0	1.00012209	0	1.00012209	0	0	0	0	0	0	0	1.00012209	0	0	0	0	0	0	0	0	0	0	0	0	0	0	0	0	0	0	0	0	0	0	0	0	0	0	0	0	0	0	0
ENSDARG00000006456	0	0	0	0	0	0	0	0	0	16.03133162	0	0	0	0	0	0	0	17.03537624	0	0	0	0	0	0	5.003054244	0	0	0	2.00048844	0	0	0	1.00012209	0	0	0	0	0	0	5.003054244	0	1.00012209	0	1.00012209	0	0	0	0	0
ENSDARG00000006462	0	0	0	0	0	0	0	0	0	1.00012209	0	0	0	0	0	0	0	1.00012209	2.00048844	0	0	0	1.00012209	0	0	0	0	0	0	0	0	1.00012209	0	0	0	0	0	0	0	0	0	0	0	0	0	0	4.001954397	0	0
ENSDARG00000006468	0	0	0	0	0	0	0	1.00012209	0	0	0	0	0	0	0	0	0	0	0	0	0	0	0	0	0	0	0	0	0	0	0	0	0	0	0	0	0	0	0	0	0	0	0	0	0	0	0	0	0
ENSDARG00000006477	0	0	0	0	0	0	0	0	0	0	0	0	0	0	0	0	0	1.00012209	0	0	0	0	0	0	0	0	0	0	0	0	0	2.00048844	0	0	0	0	0	0	0	0	0	0	0	0	0	0	1.00012209	0	0
ENSDARG00000006487	0	0	0	0	0	0	1.00012209	0	0	2.00048844	0	0	0	0	0	0	0	7.005988269	0	0	0	0	0	0	1.00012209	0	0	0	0	0	1.00012209	2.00048844	1.00012209	0	0	0	1.00012209	0	0	0	0	0	0	0	0	0	3.00109917	0	0
ENSDARG00000006491	0	0	0	0	0	0	0	0	0	0	0	0	0	0	0	0	0	0	0	0	0	0	0	0	0	0	0	0	0	0	0	0	0	0	0	0	0	0	0	0	0	0	0	0	0	0	0	0	0
ENSDARG00000006494	0	0	0	0	0	0	0	0	0	0	0	1.00012209	0	0	0	0	0	0	0	0	0	0	0	0	0	0	0	0	0	0	0	0	0	0	0	0	0	0	0	0	0	0	0	0	0	0	0	0	0
ENSDARG00000006497	0	0	0	0	0	0	0	1.00012209	0	31.11790484	0	1.00012209	0	0	0	0	0	5.003054244	0	0	0	0	3.00109917	0	3.00109917	0	1.00012209	0	0	5.003054244	4.001954397	0	0	2.00048844	6.004398828	0	2.00048844	0	0	1.00012209	0	2.00048844	0	0	0	0	5.003054244	0	0
ENSDARG00000006508	0	0	0	0	0	0	0	0	0	0	0	0	0	0	0	0	0	0	0	0	0	0	1.00012209	0	0	0	0	0	0	0	3.00109917	2.00048844	0	0	0	0	0	0	0	0	0	0	0	0	0	0	0	0	0
ENSDARG00000006514	0	0	1.00012209	0	0	0	6.004398828	0	0	5.003054244	0	3.00109917	0	0	0	0	0	0	1.00012209	0	0	0	2.00048844	0	0	0	0	0	0	0	9.009902203	1.00012209	6.004398828	0	11.01479701	0	0	0	0	0	0	0	0	0	0	1.00012209	0	0	0
ENSDARG00000006518	0	0	0	0	0	0	0	0	0	0	0	0	0	0	0	0	0	0	0	0	0	0	0	0	0	0	0	0	0	0	0	0	0	0	0	0	0	0	0	0	0	0	0	0	0	0	0	0	0
ENSDARG00000006522	0	0	0	0	0	0	0	0	0	1.00012209	0	0	0	0	0	0	0	0	0	0	0	0	0	0	0	0	0	0	0	0	0	0	0	0	0	0	0	0	0	0	0	0	0	0	0	0	0	0	0
ENSDARG00000006524	1.00012209	0	0	0	0	0	0	0	0	0	0	0	0	0	1.00012209	0	0	3.00109917	0	0	0	1.00012209	0	0	0	0	0	0	0	0	0	1.00012209	0	0	0	0	0	0	0	0	0	0	0	1.00012209	0	0	3.00109917	0	0
ENSDARG00000006526	0	4.001954397	3.00109917	0	1.00012209	2.00048844	0	0	0	2.00048844	0	2.00048844	1.00012209	0	1.00012209	1.00012209	0	405.4180295	0	3.00109917	0	0	1.00012209	0	0	0	3.00109917	0	1.00012209	0	3.00109917	1.00012209	0	0	0	0	0	0	0	62.47402785	1.00012209	0	0	0	0	0	0	0	0
ENSDARG00000006527	0	0	0	1.00012209	0	0	0	0	0	1.00012209	0	0	0	0	0	0	0	0	0	0	0	0	1.00012209	0	0	0	0	0	0	0	0	0	0	0	0	0	0	0	0	0	0	0	0	0	0	0	5.003054244	0	0
ENSDARG00000006544	0	0	0	0	0	0	0	0	0	0	0	0	0	0	0	0	0	1.00012209	0	0	0	0	0	0	0	0	0	0	0	0	0	0	0	0	0	0	0	0	0	0	0	0	0	0	0	0	0	0	0
ENSDARG00000006545	0	0	0	0	0	0	0	1.00012209	0	0	0	0	0	0	0	0	0	0	0	0	0	0	0	0	0	0	0	0	0	0	0	0	0	0	0	0	0	0	0	0	0	0	0	0	0	0	1.00012209	0	0
ENSDARG00000006546	1.00012209	0	0	0	0	0	0	1.00012209	1.00012209	2.00048844	0	0	0	0	1.00012209	0	0	1.00012209	0	0	0	0	0	0	0	0	0	0	0	0	0	0	0	0	0	0	0	0	0	2.00048844	0	0	0	0	0	0	0	0	0
ENSDARG00000006553	1.00012209	0	0	0	0	0	0	3.00109917	0	0	0	0	0	0	0	0	0	1.00012209	1.00012209	0	1.00012209	0	0	0	0	0	0	0	0	0	0	0	0	0	0	0	1.00012209	0	0	1.00012209	0	0	0	0	0	0	1.00012209	0	0
ENSDARG00000006560	0	0	0	0	0	0	0	0	0	0	0	0	0	0	0	0	0	0	0	0	0	0	0	0	0	0	0	0	0	0	0	0	0	0	0	0	0	0	0	0	0	0	0	0	0	0	0	0	0
ENSDARG00000006566	0	0	0	0	0	0	1.00012209	0	0	0	0	0	0	0	0	0	0	0	0	0	0	0	0	0	0	0	0	0	0	0	0	0	0	0	0	0	0	0	0	0	0	0	0	0	0	0	0	0	0
ENSDARG00000006567	0	0	0	0	0	0	0	0	0	0	0	0	0	0	0	0	0	1.00012209	0	0	0	0	0	0	0	0	0	0	0	0	0	0	0	0	0	0	0	0	0	0	0	0	0	0	0	0	0	0	0
ENSDARG00000006584	0	0	0	0	0	0	0	0	0	0	0	0	0	0	0	0	0	0	0	0	0	0	0	0	0	0	0	0	0	0	0	0	0	0	2.00048844	0	0	0	0	0	0	0	0	0	0	0	0	0	0
ENSDARG00000006598	0	0	0	0	0	0	0	0	0	3.00109917	0	0	0	1.00012209	0	0	0	1.00012209	0	0	0	0	1.00012209	0	0	0	0	0	0	0	0	0	0	0	0	0	0	0	0	0	0	0	0	0	0	0	0	0	0
ENSDARG00000006600	0	0	0	0	0	0	0	1.00012209	0	1.00012209	0	0	0	0	3.00109917	0	0	2.00048844	0	0	0	0	0	0	0	0	0	0	0	0	1.00012209	0	1.00012209	0	0	0	0	0	0	0	0	0	0	0	0	0	0	0	0
ENSDARG00000006601	0	0	0	0	0	0	0	0	0	0	0	0	0	0	0	0	0	0	0	0	0	0	0	0	0	0	0	0	0	0	0	0	0	0	0	0	0	0	0	0	0	0	0	0	0	0	0	0	0
ENSDARG00000006603	0	1.00012209	0	0	0	0	0	2.00048844	0	1.00012209	0	0	0	0	0	0	0	31.11790484	1.00012209	0	0	0	7.005988269	0	0	0	0	0	0	0	1.00012209	0	0	0	0	0	1.00012209	0	0	0	0	0	0	0	1.00012209	0	6.004398828	0	0
ENSDARG00000006604	0	0	0	0	0	0	0	0	0	1.00012209	0	0	0	0	0	0	0	0	0	0	0	0	0	0	1.00012209	0	0	0	0	0	0	0	0	0	0	0	0	0	0	0	0	1.00012209	0	0	0	0	0	0	0
ENSDARG00000006609	0	0	0	0	0	0	0	0	0	1.00012209	0	0	0	0	0	0	0	2.00048844	0	0	0	0	0	0	0	0	0	0	0	0	0	0	0	0	0	0	0	0	0	0	0	0	0	0	0	0	1.00012209	0	0
ENSDARG00000006615	0	0	0	0	0	0	0	0	0	0	0	0	0	0	0	0	0	0	0	0	0	0	0	0	0	0	0	0	0	0	0	0	0	0	0	0	0	0	0	0	0	0	0	0	0	0	0	0	0
ENSDARG00000006617	0	0	0	0	0	0	0	0	0	0	0	0	0	0	0	0	0	0	0	0	0	0	0	0	0	0	0	0	0	0	0	0	0	0	0	0	0	0	0	0	0	0	0	0	0	0	1.00012209	0	0
ENSDARG00000006621	0	0	0	0	0	0	0	0	0	4.001954397	0	0	0	0	0	0	0	0	0	0	0	0	0	0	0	0	0	0	0	0	0	0	0	0	0	0	0	0	0	0	0	0	0	0	0	0	0	0	0
ENSDARG00000006624	0	0	0	0	0	0	0	0	0	0	0	0	0	0	0	0	0	1.00012209	0	0	0	0	0	0	0	0	0	0	0	0	0	1.00012209	0	0	0	0	0	0	0	0	0	0	0	0	0	0	2.00048844	0	0
ENSDARG00000006639	0	0	0	0	0	0	0	0	0	0	0	0	0	0	0	0	0	1.00012209	0	0	0	0	0	0	0	0	0	0	0	0	0	0	0	0	1.00012209	0	0	0	0	0	0	0	0	0	0	0	0	0	0
ENSDARG00000006640	0	0	0	0	0	0	0	0	0	0	0	0	0	0	0	0	0	0	0	0	0	0	0	0	0	0	0	0	0	0	0	0	0	0	0	0	0	0	0	0	0	0	0	0	0	0	0	0	0
ENSDARG00000006642	1.00012209	0	0	0	0	0	0	0	1.00012209	1.00012209	0	0	0	0	0	0	0	3.00109917	0	0	0	0	1.00012209	0	0	0	0	0	0	0	0	0	1.00012209	0	0	0	0	0	0	1.00012209	0	0	0	0	0	0	2.00048844	0	0
ENSDARG00000006666	0	0	0	0	0	0	0	0	0	0	0	0	0	0	0	0	0	0	0	0	0	0	0	0	0	0	0	0	0	0	0	0	0	0	0	0	0	0	0	0	0	0	0	0	0	0	0	0	0
ENSDARG00000006672	0	0	0	0	0	0	0	0	0	0	0	0	0	0	0	0	0	0	0	0	0	0	0	0	0	0	0	0	0	0	0	0	0	0	0	0	0	0	0	0	0	0	0	0	0	0	0	0	0
ENSDARG00000006677	0	1.00012209	0	0	0	0	0	0	0	0	0	0	0	0	0	0	0	1.00012209	0	0	0	0	1.00012209	0	0	0	0	0	0	0	0	0	0	0	0	0	0	0	0	0	0	0	0	0	0	0	3.00109917	0	0
ENSDARG00000006683	0	0	0	0	0	0	0	0	0	0	0	0	0	0	0	0	0	1.00012209	0	0	0	0	0	0	0	0	0	0	0	0	0	0	0	0	0	0	0	0	0	0	0	0	0	0	0	0	1.00012209	0	0
ENSDARG00000006686	0	0	0	0	0	0	0	2.00048844	0	0	0	0	0	0	0	0	0	0	0	0	0	0	0	0	0	0	0	0	0	0	0	0	0	0	0	0	0	0	0	0	0	0	0	0	0	0	1.00012209	0	0
ENSDARG00000006687	2.00048844	1.00012209	0	0	0	0	0	0	0	2.00048844	0	1.00012209	0	0	0	2.00048844	0	9.009902203	3.00109917	0	0	0	2.00048844	0	0	0	0	0	0	0	1.00012209	0	0	0	5.003054244	0	1.00012209	0	0	1.00012209	0	3.00109917	0	1.00012209	0	0	2.00048844	0	0
ENSDARG00000006691	4.001954397	0	0	0	0	0	0	5.003054244	0	20.04898766	0	3.00109917	1.00012209	0	3.00109917	0	0	21.05401772	11.01479701	0	0	0	21.05401772	0	1.00012209	0	0	0	0	0	9.009902203	4.001954397	5.003054244	0	4.001954397	0	4.001954397	0	0	20.04898766	0	0	0	0	0	0	29.10314829	0	0
ENSDARG00000006705	0	0	0	0	0	0	0	0	0	0	0	0	0	0	0	0	0	2.00048844	1.00012209	0	0	0	0	0	0	0	0	0	0	0	0	0	0	0	0	0	0	0	0	0	0	0	0	0	0	0	0	0	0
ENSDARG00000006712	0	0	0	0	0	0	0	0	0	0	0	0	0	0	0	0	0	0	0	0	0	0	0	0	0	0	0	0	0	0	0	0	0	0	0	0	0	0	0	0	0	0	0	0	0	0	0	0	0
ENSDARG00000006719	0	0	0	0	0	0	1.00012209	0	0	1.00012209	0	1.00012209	0	0	0	0	0	8.007822687	0	0	0	0	0	0	0	0	0	0	0	0	1.00012209	0	0	0	1.00012209	0	0	0	0	0	0	0	0	0	0	0	5.003054244	0	0
ENSDARG00000006729	0	1.00012209	0	0	0	0	1.00012209	2.00048844	0	2.00048844	0	1.00012209	0	0	1.00012209	0	0	12.01761253	0	0	0	0	2.00048844	0	0	0	0	0	0	0	2.00048844	1.00012209	0	0	3.00109917	0	0	0	0	2.00048844	0	0	0	0	0	0	5.003054244	0	0
ENSDARG00000006747	0	0	0	0	0	0	0	0	0	0	0	0	0	0	0	0	0	0	0	0	0	0	0	0	0	0	0	0	0	0	0	0	0	0	0	0	0	0	0	0	0	0	0	0	0	0	0	0	0
ENSDARG00000006754	0	0	0	0	0	0	0	0	0	0	0	0	0	0	0	0	0	0	0	0	0	0	0	0	0	0	0	0	0	0	0	0	0	0	0	0	0	0	0	0	0	0	0	0	0	0	0	0	0
ENSDARG00000006758	0	0	0	0	0	0	0	0	0	0	0	0	0	0	0	0	0	0	0	0	0	0	0	0	0	0	0	0	0	0	0	0	0	0	0	0	0	0	0	0	0	0	0	0	0	0	0	0	0
ENSDARG00000006760	0	0	0	0	0	0	0	0	0	0	0	0	0	0	1.00012209	0	0	1.00012209	0	0	0	0	3.00109917	0	0	0	0	0	0	0	0	0	0	0	0	0	0	0	0	0	0	0	0	0	0	0	2.00048844	0	0
ENSDARG00000006766	1.00012209	1.00012209	0	1.00012209	0	0	0	2.00048844	0	1.00012209	0	0	0	0	1.00012209	0	0	3.00109917	0	0	0	1.00012209	1.00012209	0	0	0	0	0	0	0	0	0	1.00012209	0	0	0	0	0	0	4.001954397	0	0	0	0	0	0	5.003054244	0	0
ENSDARG00000006775	0	0	0	0	0	0	0	0	0	0	0	0	0	0	0	0	0	1.00012209	0	0	0	0	0	0	0	0	0	0	0	0	0	0	0	0	0	0	0	0	0	0	0	1.00012209	0	0	0	0	0	0	0
ENSDARG00000006782	0	0	0	0	0	0	0	0	0	0	0	0	0	0	0	0	0	0	0	0	0	0	2.00048844	0	0	0	0	0	0	0	0	0	0	0	0	1.00012209	0	0	0	0	0	0	0	0	0	0	1.00012209	0	0
ENSDARG00000006786	0	0	0	0	0	0	0	1.00012209	0	0	0	0	0	0	0	0	0	2.00048844	0	0	0	0	1.00012209	0	0	0	0	0	0	0	0	0	0	0	0	0	0	0	0	0	0	0	0	0	0	0	0	0	0
ENSDARG00000006791	0	0	0	0	0	0	0	0	0	0	0	0	0	0	0	0	0	2.00048844	3.00109917	0	0	0	0	0	0	0	0	0	0	0	0	0	0	0	0	0	0	0	0	0	0	0	0	0	0	0	1.00012209	0	0
ENSDARG00000006811	0	0	1.00012209	0	0	0	0	0	0	0	0	0	0	0	0	0	0	0	0	0	0	0	3.00109917	0	0	0	0	0	0	0	1.00012209	0	2.00048844	0	0	0	4.001954397	0	0	2.00048844	0	0	0	0	0	0	0	0	0
ENSDARG00000006812	0	0	0	0	0	0	1.00012209	2.00048844	0	1.00012209	0	0	0	0	1.00012209	0	0	0	0	0	0	0	2.00048844	0	0	0	0	0	0	0	1.00012209	0	0	0	0	0	1.00012209	0	0	0	0	1.00012209	0	0	0	0	0	0	0
ENSDARG00000006818	0	0	0	0	0	0	0	2.00048844	0	0	0	0	0	0	0	0	0	0	0	0	0	0	0	0	0	0	0	0	0	0	0	0	0	0	0	0	0	0	0	0	0	0	0	0	0	0	0	0	0
ENSDARG00000006840	0	0	0	0	0	0	0	1.00012209	0	0	0	0	0	0	0	0	0	0	0	0	0	0	1.00012209	0	0	0	0	0	0	0	0	0	0	0	0	0	0	0	0	0	0	0	0	0	0	0	0	0	0
ENSDARG00000006848	0	0	0	0	0	0	0	0	0	0	0	0	0	0	0	0	0	0	0	0	0	0	0	0	0	0	0	0	0	0	1.00012209	0	0	0	0	0	1.00012209	0	0	0	0	0	0	0	0	0	0	0	0
ENSDARG00000006849	0	0	0	0	0	0	0	0	0	0	0	0	0	0	0	0	0	0	0	0	0	0	0	0	0	0	0	0	0	0	0	0	0	0	0	0	0	0	0	0	0	0	0	0	0	0	0	0	0
ENSDARG00000006859	0	0	0	0	0	0	0	0	0	0	0	0	0	0	0	0	0	0	0	0	0	0	0	0	0	0	0	0	0	0	0	0	0	0	0	0	0	0	0	0	0	0	0	0	0	0	0	0	0
ENSDARG00000006862	0	0	0	0	0	0	0	0	0	0	0	0	0	0	0	0	0	5.003054244	0	0	0	0	0	0	0	0	0	0	0	0	0	1.00012209	0	0	0	0	0	0	0	0	0	0	0	0	0	0	0	0	0
ENSDARG00000006863	0	0	0	0	0	0	0	0	0	0	0	0	0	0	0	0	0	0	0	0	0	0	0	0	0	0	0	0	0	0	0	0	0	0	0	0	0	0	0	0	0	0	0	0	0	0	0	0	0
ENSDARG00000006877	1.00012209	0	0	0	0	0	0	4.001954397	0	0	0	0	0	0	0	0	0	1.00012209	0	0	0	0	0	0	0	0	0	0	0	0	0	0	0	0	0	0	0	0	0	0	0	0	0	0	0	0	2.00048844	0	0
ENSDARG00000006889	0	0	0	0	0	0	0	0	0	0	0	0	0	0	0	0	0	0	1.00012209	0	0	0	0	0	0	0	0	0	0	0	0	1.00012209	0	0	0	0	0	0	0	0	0	0	0	0	0	0	0	0	0
ENSDARG00000006894	0	0	0	0	0	0	0	0	0	0	0	0	0	0	0	0	0	1.00012209	0	0	0	0	0	0	0	0	0	0	0	0	0	0	0	0	0	0	0	0	0	0	0	0	0	0	0	0	0	0	0
ENSDARG00000006896	0	0	0	0	0	0	0	0	0	0	0	0	0	0	0	0	0	0	0	0	0	0	0	0	0	0	0	0	0	0	0	0	0	0	0	0	0	0	0	0	0	0	0	0	0	0	0	0	0
ENSDARG00000006899	0	0	0	0	0	0	0	0	0	0	0	0	0	0	0	0	0	3.00109917	0	0	0	0	0	0	0	0	0	0	0	0	0	0	0	0	0	0	0	0	0	0	0	0	0	0	0	0	0	0	0
ENSDARG00000006900	0	0	0	0	0	0	0	0	0	3.00109917	0	0	0	0	0	0	0	1.00012209	0	0	0	0	0	0	1.00012209	0	0	0	0	0	0	0	0	0	0	0	0	0	0	2.00048844	0	0	0	0	0	0	0	0	0
ENSDARG00000006901	0	0	0	0	0	0	0	0	0	0	0	0	0	0	0	0	0	12.01761253	0	0	0	0	0	0	0	0	0	0	0	0	0	0	0	0	0	0	0	0	0	3.00109917	0	0	0	0	0	0	0	0	0
ENSDARG00000006915	1.00012209	0	0	0	0	0	0	0	0	5.003054244	0	0	0	0	1.00012209	0	0	0	0	0	0	0	0	0	0	0	0	0	0	0	1.00012209	0	0	0	0	0	0	0	0	0	0	0	0	0	0	0	1.00012209	0	0
ENSDARG00000006921	0	0	1.00012209	0	0	0	1.00012209	0	0	0	0	0	0	0	1.00012209	0	0	0	0	0	0	0	2.00048844	0	0	0	0	0	0	1.00012209	1.00012209	0	0	0	0	0	0	0	0	0	0	0	0	1.00012209	0	0	0	0	0
ENSDARG00000006923	0	0	0	0	0	0	0	0	0	0	0	0	0	0	0	0	0	0	0	0	0	0	0	0	0	0	0	0	0	0	0	0	0	0	0	0	0	0	0	0	0	0	0	0	0	0	0	0	0
ENSDARG00000006924	0	0	0	0	0	0	0	0	0	1.00012209	0	0	0	0	0	0	0	0	0	0	0	0	0	0	0	0	0	0	0	0	0	0	0	0	0	0	0	0	0	0	0	0	0	0	0	0	0	0	0
ENSDARG00000006926	0	0	0	0	0	0	0	0	0	0	0	0	0	0	0	0	0	0	0	0	0	0	0	0	0	0	0	0	0	0	0	0	0	0	0	0	0	0	0	0	0	0	0	0	0	0	0	0	0
ENSDARG00000006944	0	0	0	0	0	0	0	0	0	0	0	0	0	0	0	0	0	0	0	0	0	0	0	0	0	0	0	0	0	0	0	0	0	0	0	0	0	0	0	0	0	0	0	0	0	0	0	0	0
ENSDARG00000006963	0	1.00012209	0	0	0	0	0	3.00109917	0	0	0	0	0	0	0	0	0	0	0	0	0	0	0	0	1.00012209	0	0	0	0	0	0	1.00012209	0	0	0	0	0	0	0	0	0	0	0	0	0	0	0	0	0
ENSDARG00000006978	0	0	0	0	0	0	0	0	0	3.00109917	0	0	0	0	0	0	0	0	0	0	0	0	2.00048844	0	0	0	0	0	0	0	0	0	0	0	0	1.00012209	0	0	0	0	0	0	0	0	0	0	0	0	0
ENSDARG00000006981	0	0	0	0	0	0	0	0	0	0	0	0	0	0	0	0	0	0	0	0	0	0	0	0	0	0	0	0	0	0	0	0	0	0	0	0	0	0	0	0	0	0	0	0	0	0	0	0	0
ENSDARG00000006982	0	0	0	0	0	0	0	0	0	0	0	0	0	0	0	0	0	0	0	0	0	0	0	0	0	0	0	0	0	0	0	0	0	0	0	0	0	0	0	0	0	0	0	0	0	0	0	0	0
ENSDARG00000006983	0	0	0	0	0	0	0	0	0	0	0	0	0	0	0	0	0	0	0	0	0	0	0	0	0	0	0	0	0	0	1.00012209	0	0	0	0	0	0	0	0	0	0	0	0	0	0	0	0	0	0
ENSDARG00000006990	0	0	0	0	0	0	0	0	0	0	0	0	0	0	0	0	0	0	0	0	0	0	0	0	0	0	0	0	0	0	0	0	0	0	0	0	0	0	0	0	0	0	0	0	0	0	0	0	0
ENSDARG00000007015	0	0	0	0	0	0	0	0	0	0	0	0	0	0	0	0	0	0	0	0	0	0	0	0	0	0	0	0	0	0	0	0	0	0	0	0	0	0	0	0	0	0	0	0	0	0	0	0	0
ENSDARG00000007018	1.00012209	0	0	0	0	0	0	1.00012209	0	0	0	0	0	0	0	0	0	0	0	0	0	0	0	0	0	0	0	0	0	0	0	0	0	0	0	0	0	0	0	0	0	0	0	0	0	0	0	0	0
ENSDARG00000007025	0	0	0	0	0	0	0	1.00012209	0	0	0	0	0	0	0	0	0	0	0	0	0	0	0	0	0	0	0	0	0	0	0	0	0	0	0	0	0	0	0	0	0	0	0	0	0	0	0	0	0
ENSDARG00000007034	0	1.00012209	0	0	0	0	0	4.001954397	0	0	0	1.00012209	0	0	0	0	0	6.004398828	0	0	0	0	0	0	0	0	0	0	0	0	0	0	0	0	0	0	1.00012209	0	0	1.00012209	0	0	0	0	0	0	2.00048844	0	0
ENSDARG00000007045	0	0	0	0	0	0	0	0	0	0	0	0	0	0	0	0	0	2.00048844	0	0	0	0	1.00012209	0	0	0	0	0	0	0	0	0	0	0	0	0	0	0	0	0	0	0	0	0	0	0	1.00012209	0	0
ENSDARG00000007065	0	0	0	0	0	0	0	0	0	1.00012209	0	0	0	0	0	0	0	1.00012209	0	0	0	0	0	0	1.00012209	0	0	0	0	0	0	0	0	0	0	0	0	0	0	0	0	0	0	0	0	0	0	0	0
ENSDARG00000007077	0	0	0	0	0	0	0	0	0	0	0	0	0	0	0	0	0	0	0	0	0	0	1.00012209	0	0	0	0	0	0	0	0	0	0	0	0	0	0	0	0	1.00012209	0	0	0	0	0	0	0	0	0
ENSDARG00000007081	0	0	0	0	0	0	0	0	0	0	0	0	0	0	0	0	0	2.00048844	0	0	0	0	0	0	0	0	0	0	0	0	0	0	0	0	0	0	0	0	0	2.00048844	0	0	0	0	0	0	0	0	0
ENSDARG00000007092	0	0	0	0	0	0	0	0	0	0	0	0	0	0	0	0	0	1.00012209	0	0	0	0	0	0	0	0	0	0	0	0	0	1.00012209	0	0	0	0	0	0	0	0	0	0	0	0	0	0	0	0	0
ENSDARG00000007096	0	0	0	0	0	0	0	0	0	0	0	0	0	0	0	0	0	0	0	0	0	0	0	0	0	0	0	0	0	0	0	0	0	0	0	0	0	0	0	0	0	0	0	0	0	0	0	0	0
ENSDARG00000007097	1.00012209	0	0	0	0	0	0	0	0	1.00012209	0	0	0	0	0	0	0	0	0	0	0	0	1.00012209	0	0	0	0	0	0	0	0	0	0	0	0	0	0	0	0	0	0	0	0	0	0	0	0	0	0
ENSDARG00000007098	6.004398828	4.001954397	1.00012209	0	0	2.00048844	3.00109917	5.003054244	0	14.02398044	0	2.00048844	0	0	8.007822687	2.00048844	0	5.003054244	12.01761253	0	0	0	17.03537624	0	3.00109917	0	1.00012209	1.00012209	0	9.009902203	17.03537624	7.005988269	12.01761253	0	17.03537624	0	14.02398044	1.00012209	0	11.01479701	0	4.001954397	0	3.00109917	0	0	41.2065799	0	0
ENSDARG00000007099	0	0	0	0	0	0	0	0	0	0	0	0	0	0	0	0	0	1.00012209	0	0	0	0	0	0	0	0	0	0	0	0	0	0	0	0	0	0	0	0	0	0	0	0	0	0	0	0	0	0	0
ENSDARG00000007108	0	0	0	0	0	0	0	0	0	2.00048844	0	0	0	0	0	0	0	0	0	0	0	0	0	0	0	0	0	0	0	0	0	0	0	0	0	0	0	0	0	0	0	0	0	0	0	0	0	0	0
ENSDARG00000007125	0	0	0	0	0	0	0	0	0	0	0	0	0	0	0	0	0	1.00012209	0	0	0	0	1.00012209	0	0	0	0	0	0	0	0	0	0	0	0	0	0	0	0	0	0	0	0	0	0	0	0	0	0
ENSDARG00000007127	0	0	0	0	0	0	0	0	0	0	0	0	0	0	0	0	0	0	0	0	0	0	0	0	0	0	0	0	0	0	0	0	0	0	0	0	0	0	0	0	0	0	0	0	0	0	1.00012209	0	0
ENSDARG00000007129	0	0	0	0	0	0	1.00012209	0	0	0	0	0	0	0	0	0	0	2.00048844	0	0	0	0	0	0	0	0	0	0	0	1.00012209	0	0	0	0	1.00012209	0	0	0	0	0	0	0	0	0	0	0	0	0	0
ENSDARG00000007130	0	0	0	0	0	0	0	0	0	0	0	0	0	0	3.00109917	0	0	1.00012209	0	0	0	0	0	0	0	0	0	0	0	0	0	0	0	0	0	0	0	0	0	0	0	0	0	0	0	0	1.00012209	0	0
ENSDARG00000007135	0	0	0	0	0	0	0	0	0	1.00012209	0	0	0	0	0	0	0	1.00012209	0	0	0	0	0	0	0	0	0	0	0	0	0	0	0	0	0	0	0	0	0	0	0	0	0	0	0	0	2.00048844	0	0
ENSDARG00000007136	1.00012209	0	0	0	0	0	0	0	0	0	0	0	0	0	1.00012209	0	0	1.00012209	0	0	0	0	0	0	0	0	0	0	0	0	0	0	0	0	0	0	0	0	0	0	0	0	0	0	0	0	0	0	0
ENSDARG00000007141	0	0	0	0	0	0	0	3.00109917	0	0	0	0	0	0	0	0	0	0	0	0	0	2.00048844	0	0	0	0	0	0	0	0	0	0	0	1.00012209	0	0	1.00012209	0	0	0	0	0	0	0	0	0	1.00012209	0	0
ENSDARG00000007169	0	0	0	0	0	0	0	0	0	0	0	0	0	0	0	0	0	0	0	0	0	0	1.00012209	0	1.00012209	0	0	0	0	0	0	0	0	0	0	0	0	0	0	0	0	0	0	0	0	0	2.00048844	0	0
ENSDARG00000007172	0	0	0	0	0	0	0	0	0	0	0	0	0	0	0	0	0	1.00012209	0	0	0	0	0	0	0	0	0	0	0	0	0	0	0	0	0	0	0	0	0	0	0	0	0	0	0	0	1.00012209	0	0
ENSDARG00000007175	0	0	0	0	0	0	0	0	0	0	0	0	0	0	0	0	0	0	0	0	0	0	0	0	0	0	0	0	0	0	0	0	0	0	0	0	0	0	0	0	0	0	0	0	0	0	0	0	0
ENSDARG00000007179	1.00012209	0	0	0	0	0	0	0	0	3.00109917	0	0	0	0	0	0	0	0	0	0	0	0	1.00012209	0	0	0	0	0	0	0	1.00012209	0	0	0	0	0	0	0	0	1.00012209	0	0	0	0	0	0	7.005988269	0	0
ENSDARG00000007180	0	0	0	0	0	0	0	0	0	0	0	0	0	0	0	0	0	1.00012209	0	0	0	0	0	0	0	0	0	0	0	0	0	0	0	0	0	0	1.00012209	0	0	0	0	0	0	0	0	0	0	0	0
ENSDARG00000007181	0	0	0	0	0	0	0	0	0	0	0	0	0	0	0	0	0	2.00048844	0	0	0	0	0	0	0	0	0	0	0	0	0	0	0	0	0	0	0	0	0	0	0	0	0	0	0	0	0	0	0
ENSDARG00000007184	0	0	0	0	0	0	0	0	0	0	0	0	0	0	0	0	0	0	0	0	0	0	0	0	0	0	0	0	0	0	0	0	0	0	0	0	0	0	0	0	0	0	0	0	0	0	0	0	0
ENSDARG00000007186	0	0	0	0	0	0	0	0	0	0	0	0	0	0	0	0	0	0	0	0	0	0	0	0	0	0	0	0	0	0	0	0	0	0	0	0	0	0	0	0	0	0	0	0	0	0	0	0	0
ENSDARG00000007196	0	0	0	0	0	0	0	1.00012209	0	0	0	0	0	0	0	0	0	1.00012209	0	0	0	0	0	0	0	0	0	0	0	0	1.00012209	0	0	0	1.00012209	0	0	0	0	0	0	0	0	0	0	0	0	0	0
ENSDARG00000007198	0	0	0	0	0	0	0	0	0	2.00048844	0	0	0	0	0	0	0	4.001954397	0	0	0	0	0	0	0	0	0	0	0	0	0	0	0	0	0	0	0	0	0	0	0	0	0	0	0	0	0	0	0
ENSDARG00000007204	0	0	0	0	0	0	0	0	0	0	0	0	0	0	0	0	0	2.00048844	0	0	0	0	5.003054244	0	0	0	0	0	0	0	0	0	1.00012209	0	0	0	1.00012209	0	0	0	0	0	0	0	0	0	2.00048844	0	0
ENSDARG00000007207	0	0	0	0	0	0	0	0	0	0	0	0	0	0	1.00012209	0	0	0	0	0	0	0	0	0	0	0	0	0	0	0	0	0	0	0	0	0	0	0	0	0	0	0	0	0	0	0	0	0	0
ENSDARG00000007216	0	1.00012209	0	0	0	0	0	3.00109917	0	0	0	1.00012209	0	0	0	0	0	7.005988269	0	0	0	0	0	0	0	0	0	0	0	0	0	0	0	0	0	0	0	0	0	0	0	0	0	0	0	0	3.00109917	0	0
ENSDARG00000007217	0	0	0	0	0	0	0	0	0	1.00012209	0	0	0	0	0	0	0	0	0	0	0	0	0	0	0	0	0	0	0	0	0	0	0	0	0	0	0	0	0	0	0	0	0	0	0	0	0	0	0
ENSDARG00000007219	0	1.00012209	0	0	0	0	0	0	0	0	0	0	0	0	0	0	0	5.003054244	0	0	0	0	3.00109917	0	0	0	0	0	0	0	1.00012209	0	0	0	0	0	0	0	0	0	0	0	0	0	0	0	3.00109917	0	0
ENSDARG00000007222	0	0	0	0	0	0	0	1.00012209	0	2.00048844	0	0	0	0	0	0	0	0	0	0	0	0	0	0	0	0	0	0	0	0	0	1.00012209	0	0	0	0	0	0	0	0	0	0	0	0	0	0	0	0	0
ENSDARG00000007231	0	1.00012209	0	0	0	0	0	0	0	0	0	0	0	0	0	0	0	2.00048844	0	0	0	0	2.00048844	0	0	0	0	0	0	0	0	0	0	0	0	0	1.00012209	0	0	1.00012209	0	0	0	0	0	0	1.00012209	0	0
ENSDARG00000007241	2.00048844	0	1.00012209	0	0	0	1.00012209	0	0	37.16812751	0	13.02067364	0	0	5.003054244	0	0	20.04898766	41.2065799	0	0	0	68.57077916	0	0	0	0	0	0	0	25.07660581	12.01761253	2.00048844	3.00109917	4.001954397	0	3.00109917	0	0	24.07058837	0	3.00109917	0	0	1.00012209	1.00012209	69.58778723	1.00012209	0
ENSDARG00000007245	0	0	0	0	0	0	0	0	0	0	0	0	0	0	0	0	0	0	0	0	0	0	0	0	0	0	0	0	0	0	0	0	0	0	0	0	0	0	0	0	0	0	0	0	0	0	0	0	0
ENSDARG00000007247	0	0	0	0	0	0	0	2.00048844	0	0	0	0	0	0	0	0	0	1.00012209	0	0	0	0	0	0	0	0	0	0	0	0	0	0	0	0	0	0	0	0	0	0	0	0	0	0	0	0	1.00012209	0	0
ENSDARG00000007250	0	0	0	0	0	0	0	0	0	0	0	0	0	0	0	0	0	0	0	0	0	0	0	0	0	0	0	0	0	0	0	0	0	0	0	0	0	0	0	0	0	0	0	0	0	0	0	0	0
ENSDARG00000007257	0	0	0	0	0	0	0	0	0	1.00012209	0	0	0	0	1.00012209	0	0	1.00012209	0	0	0	0	1.00012209	0	0	0	0	0	0	0	0	0	0	0	2.00048844	0	1.00012209	0	0	0	0	0	0	0	0	0	1.00012209	0	0
ENSDARG00000007264	0	0	1.00012209	0	0	0	0	0	0	4.001954397	0	0	0	0	2.00048844	0	0	1.00012209	0	0	0	0	0	0	1.00012209	0	0	0	0	0	2.00048844	0	0	0	0	0	1.00012209	0	0	0	0	1.00012209	0	0	0	0	1.00012209	0	0
ENSDARG00000007265	0	0	0	0	0	0	0	1.00012209	0	0	0	0	0	0	0	0	0	0	0	0	0	0	0	0	0	0	0	0	0	0	0	0	0	0	0	0	0	0	0	0	0	0	0	0	0	0	0	0	0
ENSDARG00000007271	0	0	0	0	0	0	0	0	0	0	0	0	0	0	0	0	0	2.00048844	0	0	0	0	0	0	0	0	0	0	0	0	0	0	0	0	0	0	0	0	0	0	0	0	0	0	0	0	0	0	0
ENSDARG00000007278	0	0	0	0	0	0	0	0	0	0	0	0	0	0	0	0	0	0	0	0	0	0	0	0	0	0	0	0	0	0	0	0	0	0	0	0	0	0	0	0	0	0	0	0	0	0	0	0	0
ENSDARG00000007279	0	0	0	0	0	0	0	0	0	0	0	0	0	0	0	0	0	4.001954397	0	0	0	0	1.00012209	0	0	0	0	0	0	0	0	0	0	1.00012209	0	0	0	0	0	0	0	0	0	0	0	0	0	0	0
ENSDARG00000007285	0	0	0	0	0	0	0	0	0	3.00109917	0	1.00012209	0	0	0	0	0	1.00012209	0	0	0	0	1.00012209	0	0	0	0	0	0	0	0	0	0	0	0	0	0	0	0	0	0	0	0	0	0	0	1.00012209	0	0
ENSDARG00000007294	0	1.00012209	0	0	0	0	1.00012209	0	0	23.06481795	0	0	0	0	0	0	0	9.009902203	0	0	0	2.00048844	3.00109917	0	4.001954397	0	0	0	0	0	1.00012209	1.00012209	0	0	0	0	0	0	0	1.00012209	0	2.00048844	0	0	0	0	0	0	0
ENSDARG00000007302	0	0	0	0	0	0	0	0	0	0	0	1.00012209	0	0	1.00012209	0	0	1.00012209	1.00012209	0	0	0	0	0	0	0	0	0	0	0	0	0	2.00048844	0	0	0	0	0	0	1.00012209	0	0	0	0	0	0	0	0	0
ENSDARG00000007315	0	0	0	0	0	0	0	0	0	0	0	0	0	0	0	0	0	1.00012209	1.00012209	0	0	0	0	0	0	0	0	0	0	0	0	0	0	0	0	0	0	0	0	1.00012209	0	0	0	0	0	0	0	0	0
ENSDARG00000007320	7.005988269	4.001954397	0	1.00012209	0	0	2.00048844	38.17736738	0	52.33289863	0	2.00048844	1.00012209	0	8.007822687	0	1.00012209	87.9372455	21.05401772	0	0	2.00048844	49.29544947	0	7.005988269	0	0	0	0	1.00012209	15.02753306	1.00012209	14.02398044	2.00048844	11.01479701	1.00012209	5.003054244	0	0	27.08938227	0	0	1.00012209	1.00012209	0	1.00012209	57.40032473	0	0
ENSDARG00000007323	2.00048844	0	0	0	0	2.00048844	0	3.00109917	0	1.00012209	0	1.00012209	0	0	1.00012209	0	0	4.001954397	0	0	0	0	5.003054244	0	0	0	0	0	0	0	1.00012209	1.00012209	0	1.00012209	0	0	1.00012209	0	0	0	0	1.00012209	0	0	0	0	3.00109917	0	0
ENSDARG00000007329	0	0	0	0	0	0	0	0	0	0	0	0	0	0	0	0	0	0	0	0	0	0	0	0	0	0	0	0	0	0	0	0	0	0	0	0	0	0	0	0	0	0	0	0	0	0	0	0	0
ENSDARG00000007344	0	0	0	1.00012209	0	0	1.00012209	1.00012209	0	75.69514423	0	0	1.00012209	0	0	0	0	0	0	0	0	2.00048844	0	0	0	1.00012209	0	0	0	0	2.00048844	0	0	6.004398828	1.00012209	0	0	0	0	0	0	0	0	0	1.00012209	0	0	0	0
ENSDARG00000007347	1.00012209	0	0	0	0	0	0	5.003054244	0	0	0	0	0	0	2.00048844	0	0	7.005988269	2.00048844	0	0	0	2.00048844	0	0	0	0	0	0	0	0	0	1.00012209	0	0	0	1.00012209	0	0	0	0	0	0	0	0	0	7.005988269	0	0
ENSDARG00000007349	0	0	0	0	0	0	0	0	0	0	0	0	0	0	0	0	0	0	0	0	0	0	0	0	0	0	0	0	0	0	0	0	0	0	0	0	0	0	0	0	0	0	0	0	0	0	0	0	0
ENSDARG00000007354	0	0	0	0	0	0	0	2.00048844	0	1.00012209	0	0	0	0	0	0	0	16.03133162	2.00048844	0	0	0	3.00109917	0	0	0	0	0	0	0	0	1.00012209	2.00048844	0	0	0	2.00048844	0	0	0	0	1.00012209	0	0	0	0	7.005988269	0	0
ENSDARG00000007358	0	0	0	0	0	0	0	0	0	0	0	0	0	0	0	0	0	0	0	0	0	0	0	0	0	0	0	0	0	0	0	0	0	0	0	0	0	0	0	0	0	0	0	0	0	0	0	0	0
ENSDARG00000007359	0	0	0	0	0	0	0	0	0	0	0	0	0	0	0	0	0	0	0	0	0	0	0	0	0	0	0	1.00012209	0	0	0	0	0	0	0	0	0	0	0	0	0	0	0	0	0	0	0	0	0
ENSDARG00000007362	0	0	0	0	0	0	0	1.00012209	0	2.00048844	0	0	0	0	0	0	0	0	1.00012209	0	0	0	1.00012209	0	0	0	0	0	0	0	1.00012209	1.00012209	0	0	0	0	0	0	0	0	0	1.00012209	0	0	0	0	2.00048844	0	0
ENSDARG00000007369	0	0	0	0	0	0	0	0	0	0	0	0	0	0	0	0	0	2.00048844	0	0	0	0	1.00012209	0	0	0	0	0	0	0	0	0	0	0	0	0	0	0	0	0	0	0	0	0	0	0	1.00012209	0	0
ENSDARG00000007370	0	0	0	0	0	0	0	0	0	0	0	0	0	0	0	0	0	2.00048844	1.00012209	0	0	0	2.00048844	0	0	0	0	0	0	0	0	0	0	0	0	0	0	0	0	0	0	0	0	0	0	0	2.00048844	0	0
ENSDARG00000007377	0	0	0	0	0	0	0	0	0	0	0	0	0	1.00012209	0	0	0	3.00109917	0	0	0	0	0	0	0	0	0	0	0	0	0	0	0	0	0	0	0	0	0	0	0	0	0	0	0	0	3.00109917	0	0
ENSDARG00000007383	0	0	0	0	0	0	0	0	0	0	0	0	0	0	0	0	0	2.00048844	0	0	0	0	0	0	0	0	0	0	0	0	0	0	0	0	0	0	0	0	0	0	0	0	0	0	0	0	1.00012209	0	0
ENSDARG00000007385	0	1.00012209	0	0	0	0	0	1.00012209	0	3.00109917	0	0	0	0	1.00012209	0	0	3.00109917	0	0	0	0	0	0	0	0	0	0	0	0	0	1.00012209	0	0	0	0	0	0	1.00012209	0	0	0	0	0	0	0	2.00048844	0	0
ENSDARG00000007387	2.00048844	0	0	0	0	0	0	0	0	0	0	0	0	0	0	0	0	1.00012209	0	0	0	0	0	0	0	0	0	0	0	0	0	0	0	0	0	0	0	0	0	0	0	1.00012209	0	0	0	0	0	0	0
ENSDARG00000007396	0	0	0	0	0	0	0	0	0	0	0	0	0	0	0	0	0	13.02067364	0	0	0	0	0	0	0	0	0	0	0	0	0	0	0	0	0	0	0	0	0	0	0	0	0	0	0	0	0	0	0
ENSDARG00000007398	0	0	0	0	0	0	0	0	0	0	0	0	0	0	0	0	0	0	0	0	0	0	1.00012209	0	0	0	0	0	0	0	0	0	0	0	0	0	0	0	0	0	0	0	0	0	0	0	0	0	0
ENSDARG00000007405	1.00012209	0	0	0	0	0	0	1.00012209	0	2.00048844	0	0	0	0	0	0	0	3.00109917	0	0	0	0	0	0	0	0	0	0	0	0	0	0	0	0	0	0	0	0	0	0	0	0	0	0	0	0	4.001954397	0	0
ENSDARG00000007409	0	0	0	0	0	0	0	0	0	0	0	0	0	0	0	0	0	0	0	0	0	0	0	0	0	0	0	0	0	0	0	0	0	0	0	0	0	0	0	0	0	0	0	0	0	0	0	0	0
ENSDARG00000007412	0	1.00012209	0	0	0	1.00012209	0	0	0	10.01222694	1.00012209	0	0	1.00012209	0	0	0	3.00109917	0	0	0	2.00048844	0	0	4.001954397	0	0	0	0	6.004398828	0	0	1.00012209	0	0	0	0	0	0	0	0	2.00048844	0	0	0	0	3.00109917	0	0
ENSDARG00000007413	0	0	0	0	0	0	0	0	0	0	0	0	0	0	0	1.00012209	0	2.00048844	1.00012209	0	0	0	0	0	0	0	0	0	0	0	1.00012209	0	0	0	0	0	1.00012209	0	0	0	0	0	0	0	0	0	2.00048844	0	0
ENSDARG00000007421	0	0	0	0	0	0	0	0	0	0	0	0	0	0	0	0	0	0	0	0	0	0	0	0	0	0	0	0	0	0	0	0	0	0	0	0	0	0	0	0	0	0	0	0	0	0	0	0	0
ENSDARG00000007425	0	0	0	0	0	0	0	0	0	1.00012209	0	0	0	0	0	0	0	0	0	0	0	0	0	0	2.00048844	0	0	0	0	0	0	0	0	0	0	0	1.00012209	0	0	0	0	0	0	0	0	0	0	0	0
ENSDARG00000007429	0	0	0	0	0	0	0	0	0	0	0	0	0	0	0	0	0	1.00012209	0	0	0	0	0	0	0	0	0	0	0	0	0	0	0	0	0	0	0	0	0	0	0	0	0	0	0	0	0	0	0
ENSDARG00000007438	0	0	0	0	0	0	0	2.00048844	0	1.00012209	0	0	0	0	0	0	0	4.001954397	0	0	0	0	1.00012209	0	0	0	0	0	0	0	0	0	1.00012209	0	0	0	0	0	0	0	0	0	0	0	0	0	2.00048844	0	0
ENSDARG00000007443	0	0	0	0	0	0	0	1.00012209	0	0	0	0	0	0	0	0	0	0	0	0	0	0	0	0	0	0	0	0	0	0	0	0	0	0	0	0	0	0	0	0	0	0	0	0	0	0	0	0	0
ENSDARG00000007444	0	0	0	0	0	0	0	0	0	0	0	0	0	0	0	0	0	0	0	0	0	0	0	0	0	0	0	0	0	0	0	0	0	0	0	0	0	0	0	0	0	0	0	0	0	0	0	0	0
ENSDARG00000007449	0	1.00012209	0	0	0	0	0	0	0	0	0	0	0	1.00012209	0	0	0	0	0	0	0	0	0	0	0	0	0	0	0	0	0	0	0	0	0	0	0	0	0	0	0	0	0	0	0	0	0	0	0
ENSDARG00000007461	0	0	0	0	0	0	0	0	0	0	0	0	0	0	1.00012209	0	0	2.00048844	0	0	0	0	1.00012209	0	0	0	0	0	0	0	0	1.00012209	0	0	0	0	0	0	0	0	0	0	0	0	0	0	1.00012209	0	0
ENSDARG00000007467	0	0	0	0	0	0	0	0	0	0	0	0	0	0	0	0	0	0	0	0	0	0	0	0	0	0	0	0	0	0	0	1.00012209	0	0	0	0	0	0	0	0	0	0	0	0	0	0	0	0	0
ENSDARG00000007477	0	0	0	0	0	0	0	3.00109917	0	0	0	0	0	0	0	0	0	0	1.00012209	0	0	0	1.00012209	0	0	1.00012209	0	0	0	0	2.00048844	1.00012209	0	0	1.00012209	1.00012209	4.001954397	0	0	0	0	0	0	0	0	0	1.00012209	0	0
ENSDARG00000007485	0	0	0	0	0	0	0	0	0	0	0	1.00012209	0	0	0	0	0	2.00048844	0	0	0	0	0	0	0	0	0	0	0	0	0	0	0	0	0	0	0	0	0	0	0	0	0	0	0	0	2.00048844	0	0
ENSDARG00000007490	0	0	0	0	0	0	0	0	0	0	0	0	0	0	0	0	0	0	0	0	0	0	0	0	0	0	0	0	0	0	0	0	0	0	0	0	0	0	0	0	0	0	0	0	0	0	0	0	0
ENSDARG00000007494	0	0	0	0	0	0	0	0	0	2.00048844	0	0	0	0	1.00012209	0	0	3.00109917	0	0	0	0	0	0	0	0	0	0	0	1.00012209	0	0	0	0	0	0	0	0	0	0	0	0	0	0	0	0	0	0	0
ENSDARG00000007496	0	0	0	0	0	0	0	0	0	1.00012209	0	0	0	0	0	0	0	0	0	0	0	0	0	0	0	0	0	0	0	0	0	0	1.00012209	0	0	0	0	0	0	0	0	0	0	0	0	0	0	0	0
ENSDARG00000007517	0	0	0	0	0	0	0	0	0	1.00012209	0	0	0	0	0	0	0	0	0	0	0	0	0	0	0	0	0	0	0	0	0	0	0	0	0	0	0	0	0	0	0	0	0	0	0	0	0	0	0
ENSDARG00000007523	0	0	0	0	0	0	1.00012209	0	0	0	0	0	0	0	0	0	0	0	0	0	0	0	1.00012209	0	0	0	0	0	0	0	1.00012209	1.00012209	0	0	0	0	0	0	0	1.00012209	0	0	0	0	0	0	2.00048844	0	0
ENSDARG00000007526	0	0	0	0	0	0	0	1.00012209	0	8.007822687	0	0	0	0	0	0	0	4.001954397	0	0	0	0	2.00048844	0	5.003054244	0	0	0	0	1.00012209	0	1.00012209	0	0	0	0	0	0	0	0	0	0	0	1.00012209	0	0	4.001954397	0	0
ENSDARG00000007531	0	0	0	0	0	0	0	0	0	0	0	0	0	0	0	0	0	3.00109917	0	0	0	0	0	0	0	0	0	0	0	0	1.00012209	2.00048844	0	0	0	0	0	0	0	1.00012209	0	0	0	0	0	0	0	0	0
ENSDARG00000007549	0	0	0	0	0	0	0	2.00048844	0	0	0	0	0	0	0	0	0	0	0	0	0	0	0	0	0	0	0	0	0	0	0	0	0	0	0	0	0	0	0	0	0	0	0	0	0	0	0	0	0
ENSDARG00000007553	0	0	0	0	0	0	0	0	0	0	0	0	0	0	0	0	0	0	0	0	0	0	0	0	0	0	0	0	0	0	0	0	0	0	0	0	0	0	0	0	0	0	0	0	0	0	0	0	0
ENSDARG00000007560	0	0	0	0	0	0	0	0	0	0	0	0	0	0	0	0	0	0	0	0	0	0	0	0	0	0	0	0	0	0	0	0	0	0	0	0	0	0	0	0	0	0	0	0	0	0	1.00012209	0	0
ENSDARG00000007566	1.00012209	0	0	0	0	0	0	0	0	2.00048844	0	0	0	0	0	0	0	1.00012209	0	0	0	0	0	0	0	0	0	0	0	0	1.00012209	0	0	0	0	0	0	0	0	0	0	0	0	0	0	0	1.00012209	0	0
ENSDARG00000007578	0	0	0	0	0	0	0	0	0	0	0	0	0	0	0	0	0	0	0	0	0	0	0	0	0	0	0	0	0	0	0	0	0	0	0	0	0	0	0	0	0	0	0	0	0	0	0	0	0
ENSDARG00000007597	0	0	0	0	0	0	0	0	0	0	0	0	0	0	0	0	0	1.00012209	1.00012209	0	0	0	1.00012209	0	1.00012209	0	0	0	0	0	0	0	0	0	0	0	0	0	0	0	0	0	0	0	0	0	2.00048844	0	0
ENSDARG00000007601	0	0	0	0	0	0	0	0	0	0	0	0	0	0	0	0	0	2.00048844	0	0	0	0	0	0	0	0	0	0	0	0	0	0	0	0	0	0	0	0	0	0	0	0	0	0	0	0	0	0	0
ENSDARG00000007603	1.00012209	0	0	0	0	0	0	2.00048844	0	0	0	0	0	1.00012209	0	0	0	0	0	0	0	0	0	0	0	0	0	0	0	0	0	2.00048844	0	0	1.00012209	0	0	0	0	0	0	0	0	0	0	0	4.001954397	0	0
ENSDARG00000007614	0	0	0	0	0	0	0	0	0	0	0	0	0	0	0	0	0	0	0	0	0	0	0	0	0	0	0	0	0	0	0	0	0	0	0	0	0	0	0	0	0	0	0	0	0	0	0	0	0
ENSDARG00000007624	0	0	0	0	0	0	0	0	0	0	0	0	0	0	0	0	0	0	0	0	0	0	0	0	0	0	0	0	0	0	0	0	0	0	0	0	0	0	0	0	0	0	0	0	0	0	0	0	0
ENSDARG00000007628	29.10314829	1.00012209	0	1.00012209	0	0	1.00012209	23.06481795	0	2.00048844	0	0	0	0	2.00048844	0	0	12.01761253	9.009902203	0	0	0	1.00012209	0	1.00012209	0	0	0	0	0	4.001954397	2.00048844	0	0	0	0	0	1.00012209	0	29.10314829	0	0	0	0	0	0	2.00048844	0	0
ENSDARG00000007630	0	0	0	0	0	0	0	0	0	0	0	0	0	0	0	0	0	0	0	0	0	0	0	0	0	0	0	0	0	0	0	0	0	0	0	0	0	0	0	0	0	0	0	0	0	0	0	0	0
ENSDARG00000007639	1.00012209	0	0	0	0	0	0	0	0	1.00012209	0	0	0	0	0	0	0	3.00109917	1.00012209	0	0	0	0	0	0	0	0	0	0	0	0	1.00012209	0	1.00012209	0	0	0	0	0	0	0	0	0	0	0	0	1.00012209	0	0
ENSDARG00000007657	0	0	0	0	0	0	0	0	0	0	0	0	0	0	0	0	0	1.00012209	0	0	0	0	0	0	0	0	0	0	0	0	0	0	0	0	0	0	0	0	0	0	0	0	0	0	0	0	0	0	0
ENSDARG00000007665	0	0	0	0	0	0	0	0	0	0	0	0	0	0	0	0	0	0	0	0	0	0	0	0	0	0	0	0	0	0	0	0	0	0	0	0	0	0	0	0	0	0	0	0	0	0	0	0	0
ENSDARG00000007671	1.00012209	0	0	0	0	1.00012209	0	0	0	4.001954397	0	1.00012209	0	0	0	0	0	1.00012209	2.00048844	0	0	0	0	0	0	0	0	1.00012209	0	1.00012209	3.00109917	0	0	0	0	0	0	0	0	6.004398828	0	0	0	0	0	0	0	0	0
ENSDARG00000007678	0	0	0	0	0	0	0	0	0	0	0	0	0	0	0	0	0	1.00012209	0	0	0	0	0	0	0	0	0	0	0	0	0	0	0	0	0	0	0	0	0	0	0	0	0	0	0	0	0	0	0
ENSDARG00000007682	0	0	0	0	0	0	0	0	1.00012209	20.04898766	0	0	0	0	0	0	0	0	0	0	0	0	0	0	7.005988269	0	0	0	0	0	0	2.00048844	0	0	0	0	1.00012209	0	0	1.00012209	0	0	0	0	0	0	1.00012209	0	0
ENSDARG00000007691	0	0	0	1.00012209	0	0	0	0	0	0	0	4.001954397	0	0	0	0	0	2.00048844	1.00012209	0	0	0	0	0	0	0	0	0	0	0	0	1.00012209	0	0	0	0	1.00012209	0	0	0	0	0	0	0	0	0	1.00012209	0	0
ENSDARG00000007693	4.001954397	0	0	1.00012209	0	0	0	6.004398828	0	2.00048844	0	4.001954397	0	0	3.00109917	0	0	5.003054244	3.00109917	0	0	0	2.00048844	0	3.00109917	0	0	0	0	0	7.005988269	0	6.004398828	0	13.02067364	0	11.01479701	0	0	3.00109917	0	0	0	0	0	0	2.00048844	0	0
ENSDARG00000007697	0	0	0	0	0	0	0	0	0	0	0	0	0	0	0	0	0	1.00012209	0	0	0	0	0	0	0	0	0	0	0	0	1.00012209	0	0	0	0	0	0	0	0	0	0	0	0	0	0	0	0	0	0
ENSDARG00000007708	0	0	0	0	0	0	0	3.00109917	0	6.004398828	0	0	0	0	5.003054244	0	0	2.00048844	13.02067364	1.00012209	0	0	8.007822687	1.00012209	0	0	0	0	0	0	0	0	1.00012209	1.00012209	1.00012209	0	0	0	0	9.009902203	0	0	0	1.00012209	0	1.00012209	1.00012209	0	0
ENSDARG00000007709	0	0	0	0	0	0	0	0	0	0	0	0	0	0	0	0	0	1.00012209	0	0	0	0	0	0	0	0	0	0	0	0	0	0	0	0	0	0	0	0	0	0	0	0	0	0	0	0	0	0	0
ENSDARG00000007711	0	0	0	0	0	0	0	0	0	0	0	1.00012209	0	0	0	0	0	1.00012209	0	0	0	0	1.00012209	0	0	0	0	0	0	0	0	0	0	0	0	0	0	0	0	0	0	0	0	0	0	0	0	0	0
ENSDARG00000007714	0	0	0	0	0	0	0	0	0	1.00012209	0	0	0	0	0	0	0	1.00012209	0	0	0	0	1.00012209	0	0	0	0	0	0	0	0	0	0	0	0	0	0	0	0	0	0	0	0	0	0	0	0	0	0
ENSDARG00000007720	1.00012209	0	1.00012209	0	0	0	0	0	0	6.004398828	0	0	0	0	1.00012209	0	0	2.00048844	1.00012209	0	0	1.00012209	4.001954397	0	0	0	0	0	0	0	3.00109917	2.00048844	0	0	0	0	2.00048844	0	0	0	0	0	0	0	0	0	2.00048844	0	0
ENSDARG00000007722	0	0	0	0	0	0	0	0	0	2.00048844	0	0	0	0	0	0	0	1.00012209	0	0	0	0	0	0	0	0	0	0	0	0	0	0	0	0	0	0	0	0	0	0	0	0	0	0	0	0	1.00012209	0	0
ENSDARG00000007723	0	0	0	0	0	0	0	0	0	0	0	0	0	0	0	0	0	2.00048844	0	0	0	0	0	0	0	0	0	0	0	0	1.00012209	0	0	0	1.00012209	0	0	0	0	1.00012209	0	0	0	0	0	0	1.00012209	0	0
ENSDARG00000007727	0	0	0	0	0	0	0	0	0	1.00012209	0	0	0	0	1.00012209	0	0	4.001954397	0	0	0	0	0	0	0	1.00012209	0	0	0	0	2.00048844	0	0	0	1.00012209	0	2.00048844	0	0	1.00012209	0	0	0	0	0	0	3.00109917	0	0
ENSDARG00000007734	0	0	0	0	0	0	0	0	0	0	0	0	0	0	0	0	0	0	0	0	0	0	0	0	0	0	0	0	0	0	0	0	0	0	0	0	0	0	0	0	0	0	0	0	0	0	0	0	0
ENSDARG00000007737	0	0	0	0	0	0	0	1.00012209	0	0	0	0	0	0	0	0	0	1.00012209	0	0	0	0	0	0	0	0	0	0	0	0	1.00012209	0	0	0	0	0	0	0	0	0	0	0	0	0	0	0	0	0	0
ENSDARG00000007743	0	0	0	0	0	0	0	0	0	0	0	0	0	0	0	0	0	0	1.00012209	0	0	0	0	0	0	0	0	0	0	0	0	0	0	0	0	0	0	0	0	0	0	0	0	0	0	0	0	0	0
ENSDARG00000007744	0	0	0	0	0	0	0	0	0	2.00048844	0	0	0	0	0	0	0	2.00048844	0	0	0	0	1.00012209	0	0	0	0	0	0	0	0	0	0	0	0	0	0	0	0	0	0	0	0	0	0	0	0	0	0
ENSDARG00000007745	0	0	0	0	0	1.00012209	0	0	0	32.12565488	0	0	0	0	0	0	0	3.00109917	1.00012209	0	0	1.00012209	1.00012209	0	1.00012209	0	0	0	0	0	1.00012209	1.00012209	0	4.001954397	0	1.00012209	1.00012209	0	0	1.00012209	0	2.00048844	0	0	0	0	0	0	0
ENSDARG00000007755	0	0	0	0	0	0	0	1.00012209	0	0	0	0	0	0	0	0	0	1.00012209	0	0	0	0	0	0	0	0	0	0	0	0	0	0	1.00012209	0	0	0	0	0	0	0	0	0	0	0	0	0	0	0	0
ENSDARG00000007760	0	0	0	0	0	0	0	0	0	1.00012209	0	0	0	0	0	0	0	0	0	0	0	0	0	0	0	0	0	0	0	0	0	0	0	0	0	0	0	0	0	0	0	0	0	0	0	0	0	0	0
ENSDARG00000007764	0	0	0	0	0	0	0	0	0	1.00012209	0	0	0	0	1.00012209	0	0	0	0	0	0	0	1.00012209	0	0	0	0	0	0	0	0	0	0	0	0	0	0	0	0	0	0	0	0	0	0	0	0	0	0
ENSDARG00000007774	0	0	0	0	0	0	0	0	0	0	0	0	0	0	0	0	0	0	0	0	0	0	0	0	0	0	0	0	0	0	0	0	0	0	0	0	0	0	0	0	0	0	0	0	0	0	1.00012209	0	0
ENSDARG00000007786	0	0	0	0	0	0	0	0	0	0	0	0	0	0	0	0	0	4.001954397	0	0	0	0	0	0	1.00012209	0	0	0	0	0	0	0	1.00012209	0	0	0	0	0	0	0	0	0	0	0	0	0	3.00109917	0	0
ENSDARG00000007788	1.00012209	0	0	0	0	0	0	0	0	0	0	0	0	0	0	0	0	0	0	0	0	0	0	0	0	0	0	0	0	0	0	0	0	0	0	0	0	0	0	0	0	0	0	0	0	0	1.00012209	0	0
ENSDARG00000007791	0	0	0	0	0	0	0	3.00109917	0	5.003054244	0	1.00012209	0	0	3.00109917	0	0	6.004398828	0	0	0	0	0	0	0	0	0	0	0	0	0	0	0	0	1.00012209	0	1.00012209	0	0	1.00012209	0	3.00109917	0	0	0	0	8.007822687	0	0
ENSDARG00000007795	2.00048844	1.00012209	0	0	0	0	4.001954397	11.01479701	0	6.004398828	0	1.00012209	0	1.00012209	3.00109917	0	0	8.007822687	8.007822687	0	0	0	4.001954397	0	1.00012209	0	0	0	0	2.00048844	4.001954397	2.00048844	5.003054244	0	7.005988269	0	2.00048844	0	0	6.004398828	0	3.00109917	0	1.00012209	0	1.00012209	21.05401772	0	0
ENSDARG00000007804	0	1.00012209	0	0	0	0	0	0	0	1.00012209	0	0	0	0	0	0	0	1.00012209	4.001954397	0	0	0	4.001954397	0	0	0	1.00012209	0	0	0	1.00012209	2.00048844	0	0	1.00012209	0	0	0	0	0	0	3.00109917	0	0	0	0	3.00109917	0	0
ENSDARG00000007807	0	0	0	0	0	0	0	0	0	0	0	1.00012209	0	0	0	0	0	1.00012209	0	0	0	0	1.00012209	0	0	0	0	0	0	0	4.001954397	3.00109917	1.00012209	0	0	0	0	0	0	0	0	0	0	0	0	0	1.00012209	0	0
ENSDARG00000007808	0	0	0	0	0	0	0	0	0	0	0	0	0	0	0	0	0	1.00012209	0	0	0	0	0	0	0	0	0	0	0	0	0	0	0	0	0	0	1.00012209	0	0	1.00012209	0	0	0	0	0	0	1.00012209	0	0
ENSDARG00000007812	1.00012209	0	0	0	0	0	0	0	0	0	0	0	0	0	0	0	0	3.00109917	0	0	0	0	0	0	0	0	0	0	0	0	3.00109917	0	0	0	0	0	0	0	0	0	0	0	0	0	1.00012209	0	0	0	0
ENSDARG00000007813	1.00012209	0	0	0	0	0	0	0	0	1.00012209	0	0	0	0	0	0	0	0	0	0	0	0	0	0	0	0	0	0	0	0	1.00012209	0	0	0	0	0	0	0	0	0	0	0	0	0	0	0	1.00012209	0	0
ENSDARG00000007818	0	0	0	0	0	0	0	0	1.00012209	7.005988269	0	1.00012209	1.00012209	0	2.00048844	0	0	6.004398828	5.003054244	0	0	0	2.00048844	0	0	0	0	0	0	0	0	1.00012209	1.00012209	0	3.00109917	0	0	0	0	1.00012209	0	0	0	1.00012209	0	1.00012209	4.001954397	0	0
ENSDARG00000007823	1.00012209	1.00012209	0	2.00048844	0	0	0	7.005988269	0	58.4145627	0	0	1.00012209	0	0	0	0	0	3.00109917	0	1.00012209	0	8.007822687	0	0	0	0	0	0	0	0	1.00012209	0	0	2.00048844	0	1.00012209	0	0	2.00048844	0	2.00048844	0	0	0	1.00012209	1.00012209	0	0
ENSDARG00000007824	0	0	0	0	0	0	0	0	0	0	0	0	0	0	0	0	0	0	0	0	0	0	2.00048844	0	0	0	0	0	0	0	0	0	0	0	0	0	0	0	0	0	0	0	0	0	0	0	0	0	0
ENSDARG00000007825	0	0	1.00012209	0	0	0	0	0	0	0	0	0	0	0	1.00012209	0	0	2.00048844	3.00109917	0	0	0	1.00012209	0	0	0	0	0	0	1.00012209	1.00012209	1.00012209	0	0	3.00109917	0	3.00109917	0	0	0	0	0	0	0	0	0	4.001954397	0	0
ENSDARG00000007836	0	0	0	0	0	0	1.00012209	0	0	10.01222694	0	0	0	0	4.001954397	0	0	12.01761253	11.01479701	0	0	2.00048844	1.00012209	0	1.00012209	1.00012209	0	0	0	8.007822687	0	0	0	1.00012209	1.00012209	0	0	0	0	0	0	1.00012209	0	0	0	0	28.09614152	0	0
ENSDARG00000007856	0	0	0	0	0	0	0	0	0	0	0	0	0	0	1.00012209	0	0	0	0	0	0	0	0	0	1.00012209	0	0	0	0	0	0	0	0	0	0	0	0	0	0	0	0	1.00012209	0	0	0	0	1.00012209	0	0
ENSDARG00000007863	0	0	0	0	0	0	0	2.00048844	0	0	0	0	0	0	0	0	0	3.00109917	1.00012209	0	0	0	2.00048844	0	0	0	0	0	0	0	0	2.00048844	0	0	0	0	1.00012209	0	0	0	0	0	0	0	0	0	0	0	0
ENSDARG00000007867	0	0	0	0	0	0	0	3.00109917	0	1.00012209	0	0	0	0	0	0	0	1.00012209	0	0	0	0	2.00048844	0	0	0	0	0	0	0	0	1.00012209	0	0	0	0	0	0	0	3.00109917	0	0	0	0	0	0	2.00048844	0	0
ENSDARG00000007869	0	0	0	0	0	0	0	0	0	1.00012209	0	0	0	0	3.00109917	0	0	3.00109917	0	0	0	0	0	0	0	0	0	0	0	0	1.00012209	0	0	0	0	0	0	0	0	0	0	0	0	0	0	0	0	0	0
ENSDARG00000007886	0	0	0	0	0	0	0	0	0	0	0	0	0	0	0	0	0	1.00012209	0	0	0	0	0	0	0	0	0	0	0	0	0	1.00012209	0	0	0	0	0	0	0	0	0	0	0	0	0	0	0	0	0
ENSDARG00000007891	0	0	0	0	0	0	0	0	0	0	0	0	0	0	0	0	0	0	0	0	0	0	0	0	0	0	0	0	0	0	0	0	0	0	0	0	0	0	0	0	0	0	0	0	0	0	0	0	0
ENSDARG00000007901	0	0	0	0	0	0	0	0	0	1.00012209	0	0	0	0	0	0	0	1.00012209	0	0	0	0	1.00012209	0	0	0	0	0	0	0	0	0	0	0	0	0	0	0	0	0	0	0	0	0	0	0	1.00012209	0	0
ENSDARG00000007915	0	0	0	0	0	0	0	0	0	1.00012209	0	1.00012209	0	0	0	0	0	0	0	0	0	0	0	0	0	0	0	0	0	0	0	1.00012209	0	0	1.00012209	0	0	0	0	0	0	0	0	0	0	0	0	0	0
ENSDARG00000007916	0	0	0	0	0	0	0	0	0	0	0	0	0	0	0	0	0	0	0	0	0	0	0	0	1.00012209	0	0	0	0	0	0	0	0	0	0	0	0	0	0	0	0	0	0	0	0	0	0	0	0
ENSDARG00000007918	0	0	0	0	0	0	0	0	0	0	0	0	0	0	0	0	0	1.00012209	0	0	0	0	1.00012209	0	0	0	0	0	0	0	0	0	0	0	0	0	0	0	0	0	0	0	0	0	0	0	2.00048844	0	0
ENSDARG00000007921	0	0	0	0	0	0	0	0	0	0	0	0	0	0	0	0	0	0	0	0	0	0	0	0	0	0	0	0	0	0	0	0	0	0	0	0	0	0	0	0	0	0	0	0	0	0	0	0	0
ENSDARG00000007923	0	0	0	0	0	0	0	0	0	0	0	0	0	0	0	0	0	0	0	0	0	0	1.00012209	0	0	0	0	0	0	0	0	0	0	0	0	0	0	0	0	0	0	0	0	0	0	0	1.00012209	0	0
ENSDARG00000007943	0	0	0	0	0	0	0	2.00048844	0	0	0	0	0	0	0	0	0	1.00012209	0	0	0	0	0	0	0	0	0	0	0	0	0	0	0	0	0	0	0	0	0	0	0	0	0	0	0	0	0	0	0
ENSDARG00000007950	0	0	0	0	0	0	0	0	0	0	0	0	0	0	0	0	0	0	0	0	0	0	0	0	0	0	0	0	0	0	0	0	0	0	0	0	0	0	0	0	0	0	0	0	0	0	0	0	0
ENSDARG00000007955	1.00012209	1.00012209	0	0	0	0	0	3.00109917	0	2.00048844	0	0	0	0	0	0	0	0	0	0	0	0	0	0	0	0	0	0	0	0	0	0	0	0	0	0	0	0	0	1.00012209	0	0	0	0	0	0	2.00048844	0	0
ENSDARG00000007959	0	0	0	0	0	0	0	0	0	1.00012209	0	0	0	0	0	0	0	3.00109917	0	0	0	0	0	0	0	0	0	0	0	0	1.00012209	0	0	0	0	0	0	0	0	0	0	0	0	0	0	0	2.00048844	0	0
ENSDARG00000007960	0	0	0	0	0	1.00012209	1.00012209	1.00012209	0	5.003054244	0	1.00012209	0	0	2.00048844	0	0	6.004398828	2.00048844	0	0	0	10.01222694	0	1.00012209	0	0	0	0	0	1.00012209	3.00109917	2.00048844	0	4.001954397	1.00012209	2.00048844	0	0	2.00048844	0	0	0	0	0	0	15.02753306	0	0
ENSDARG00000007971	0	0	0	0	0	0	0	0	0	0	0	0	0	0	0	0	0	0	0	0	0	0	0	0	0	0	0	0	0	0	0	0	0	0	0	0	0	0	0	0	0	0	0	0	0	0	0	0	0
ENSDARG00000007975	0	0	0	0	0	0	0	0	0	2.00048844	0	0	0	0	0	0	0	1.00012209	0	0	0	0	0	0	2.00048844	0	0	0	0	0	0	0	0	0	0	0	0	0	0	0	0	0	0	0	0	0	1.00012209	0	0
ENSDARG00000007976	0	0	0	0	0	0	0	0	0	1.00012209	0	0	0	0	0	0	0	0	0	0	0	0	1.00012209	0	0	0	0	0	0	0	0	0	0	0	0	0	0	0	0	0	0	0	0	0	0	0	0	0	0
ENSDARG00000007982	0	0	0	0	0	0	0	0	0	0	0	0	0	0	0	0	0	0	0	0	0	0	0	0	0	0	0	0	0	0	0	0	0	0	0	0	0	0	0	0	0	0	0	0	0	0	0	0	0
ENSDARG00000007989	0	0	0	0	0	0	0	0	0	0	0	1.00012209	0	0	0	0	0	1.00012209	1.00012209	0	0	0	1.00012209	0	1.00012209	0	0	0	0	0	0	0	0	1.00012209	0	0	0	0	0	0	0	0	0	0	0	0	0	0	0
ENSDARG00000007990	0	0	0	0	0	0	0	6.004398828	0	0	0	0	0	0	0	0	0	3.00109917	0	0	0	0	0	0	0	0	0	0	0	0	0	0	0	0	0	0	0	0	0	1.00012209	0	0	0	0	0	0	0	0	0
ENSDARG00000007993	0	1.00012209	0	0	0	0	0	0	0	0	0	0	0	0	0	0	0	1.00012209	0	0	0	0	0	0	0	0	0	0	0	0	0	0	0	0	0	0	1.00012209	0	0	0	0	0	0	0	0	0	0	0	0
ENSDARG00000007996	0	0	0	0	0	0	0	0	0	1.00012209	0	0	0	0	0	0	0	0	0	0	0	0	1.00012209	0	0	0	0	0	0	0	0	0	0	0	0	0	0	0	0	0	0	0	0	0	0	0	0	0	0
ENSDARG00000008014	0	0	1.00012209	0	0	0	0	0	0	1.00012209	0	0	0	0	0	0	0	0	0	0	0	0	2.00048844	0	0	0	0	0	0	0	0	0	0	0	0	0	0	1.00012209	0	0	0	1.00012209	0	0	0	0	1.00012209	0	0
ENSDARG00000008020	1.00012209	0	0	0	0	0	0	0	0	0	0	0	0	0	0	0	0	1.00012209	0	0	0	0	1.00012209	0	0	0	0	0	0	0	0	1.00012209	1.00012209	0	0	0	0	0	0	0	0	0	0	0	0	0	1.00012209	0	0
ENSDARG00000008026	1.00012209	0	0	0	0	0	0	3.00109917	0	0	0	0	0	0	0	0	0	4.001954397	0	0	0	0	0	0	0	0	0	0	0	0	1.00012209	0	0	0	0	0	0	0	0	0	0	0	0	0	0	0	3.00109917	0	0
ENSDARG00000008029	0	0	0	0	0	0	0	0	0	0	0	0	0	0	0	0	0	0	0	0	0	0	0	0	0	0	0	0	0	0	0	0	0	0	0	0	0	0	0	0	0	0	0	0	0	0	0	0	0
ENSDARG00000008030	0	3.00109917	2.00048844	0	1.00012209	0	8.007822687	0	0	39.18685599	0	4.001954397	0	0	4.001954397	0	0	20.04898766	8.007822687	0	0	4.001954397	16.03133162	0	4.001954397	1.00012209	0	0	0	0	8.007822687	11.01479701	9.009902203	2.00048844	1.00012209	1.00012209	5.003054244	0	0	10.01222694	0	5.003054244	0	0	0	0	20.04898766	0	0
ENSDARG00000008032	1.00012209	0	0	0	0	0	0	0	0	3.00109917	0	0	0	0	0	0	0	5.003054244	0	0	0	0	1.00012209	0	0	0	0	0	0	0	0	0	3.00109917	0	0	0	0	0	0	0	0	0	0	0	0	0	2.00048844	0	0
ENSDARG00000008034	0	1.00012209	0	0	0	0	0	0	0	0	0	0	0	0	0	0	0	9.009902203	1.00012209	0	0	0	0	0	1.00012209	0	0	0	0	0	1.00012209	3.00109917	2.00048844	0	1.00012209	1.00012209	0	0	0	0	0	0	0	0	0	0	2.00048844	0	0
ENSDARG00000008049	0	0	0	0	0	0	0	2.00048844	0	0	0	0	0	0	0	0	0	5.003054244	0	0	0	0	0	0	0	0	0	0	0	0	0	0	0	0	0	0	0	0	0	1.00012209	0	0	0	0	0	0	0	0	0
ENSDARG00000008052	0	0	0	0	0	0	0	0	0	2.00048844	0	0	0	0	0	0	0	2.00048844	0	0	0	0	0	0	0	0	0	0	0	0	1.00012209	0	0	0	1.00012209	0	0	0	0	0	0	0	0	0	0	0	0	0	0
ENSDARG00000008057	0	0	0	0	0	0	0	0	0	2.00048844	0	0	0	0	0	0	0	0	0	0	0	0	0	0	0	0	0	0	0	2.00048844	0	0	1.00012209	0	0	0	0	0	0	0	0	0	0	0	0	0	1.00012209	0	0
ENSDARG00000008060	0	0	0	0	0	0	0	0	0	0	0	0	0	0	0	0	0	3.00109917	0	0	0	0	0	0	0	0	0	0	0	0	0	0	0	0	0	0	0	0	0	3.00109917	0	0	0	0	0	0	0	0	0
ENSDARG00000008068	0	0	0	0	0	0	0	0	0	0	0	0	0	0	0	0	0	3.00109917	0	0	0	0	0	0	0	0	0	0	0	0	0	0	0	0	0	0	0	0	0	0	0	0	0	0	0	0	0	0	0
ENSDARG00000008097	0	0	0	0	0	0	0	0	0	0	0	0	0	0	0	0	0	0	0	0	0	0	1.00012209	0	0	0	0	0	0	0	0	0	0	0	0	0	0	0	0	1.00012209	0	0	0	0	0	0	0	0	0
ENSDARG00000008098	0	0	0	0	0	0	0	0	0	0	0	0	0	0	0	0	0	1.00012209	0	0	0	0	0	0	0	0	0	0	0	0	0	0	0	0	0	0	0	0	0	0	0	0	0	0	0	0	0	0	0
ENSDARG00000008100	0	0	0	0	0	0	0	0	0	3.00109917	0	0	0	0	0	0	0	13.02067364	0	0	0	0	0	0	0	0	0	0	0	0	0	0	0	0	0	0	0	0	0	0	0	0	0	0	0	0	0	0	0
ENSDARG00000008105	0	0	0	0	0	0	0	1.00012209	0	0	0	0	0	0	0	0	0	0	0	0	0	0	0	0	0	0	0	0	0	0	0	0	0	0	0	0	0	0	0	0	0	0	0	0	0	0	0	0	0
ENSDARG00000008107	0	0	0	0	0	0	0	0	0	1.00012209	0	0	0	0	0	0	0	0	0	0	0	0	0	0	0	0	0	0	0	0	0	0	0	0	0	0	0	0	0	0	0	0	0	0	0	0	0	0	0
ENSDARG00000008109	0	1.00012209	0	0	0	0	1.00012209	2.00048844	0	14.02398044	0	2.00048844	1.00012209	0	1.00012209	0	1.00012209	9.009902203	4.001954397	1.00012209	0	0	8.007822687	0	3.00109917	0	1.00012209	0	0	0	3.00109917	2.00048844	4.001954397	0	0	0	0	0	0	7.005988269	0	2.00048844	0	0	0	0	10.01222694	0	0
ENSDARG00000008119	0	0	0	0	0	0	0	1.00012209	0	0	0	1.00012209	0	0	0	0	0	1.00012209	0	0	0	0	0	0	0	0	0	0	0	0	0	0	0	0	0	0	0	0	0	0	0	0	0	0	0	0	0	0	0
ENSDARG00000008127	0	0	0	0	0	0	0	0	0	0	0	0	0	0	0	0	0	0	0	0	0	0	0	0	0	0	0	0	0	0	0	0	0	0	0	0	0	0	0	0	0	0	0	0	0	0	0	0	0
ENSDARG00000008140	0	0	0	0	0	0	0	0	0	0	0	0	0	0	0	0	0	0	0	0	0	0	0	0	0	0	0	0	0	0	0	0	0	0	0	0	0	0	0	0	0	0	0	0	0	0	0	0	0
ENSDARG00000008141	0	0	0	0	0	0	0	1.00012209	0	1.00012209	0	0	0	0	0	0	0	0	0	0	0	0	0	0	0	0	0	0	0	0	0	0	0	0	0	0	0	0	0	0	0	2.00048844	0	0	0	0	0	0	0
ENSDARG00000008142	0	0	0	0	0	0	0	1.00012209	0	2.00048844	0	0	0	0	1.00012209	0	0	4.001954397	1.00012209	0	0	0	1.00012209	0	0	0	0	1.00012209	0	0	0	1.00012209	0	0	0	0	0	0	0	0	0	0	0	0	0	0	0	0	0
ENSDARG00000008153	0	0	0	0	0	0	0	0	0	0	0	0	0	0	1.00012209	0	0	4.001954397	0	0	0	0	1.00012209	0	0	0	0	0	0	0	0	0	0	0	0	0	0	0	0	0	0	0	0	0	0	0	1.00012209	0	0
ENSDARG00000008155	1.00012209	0	0	0	0	0	0	0	0	0	0	0	0	0	0	0	0	3.00109917	1.00012209	0	0	0	0	0	0	0	0	0	0	0	0	0	0	0	0	0	0	0	0	0	0	0	0	0	0	0	0	0	0
ENSDARG00000008165	0	0	0	0	0	0	0	1.00012209	0	0	0	0	0	0	0	0	0	0	0	0	0	0	0	0	0	0	0	0	0	0	0	0	0	0	0	0	0	0	0	0	0	0	0	0	0	0	0	0	0
ENSDARG00000008184	0	1.00012209	0	0	0	0	0	1.00012209	0	0	0	0	0	0	0	0	0	3.00109917	0	0	0	0	1.00012209	0	0	0	0	0	0	0	0	0	0	0	0	0	2.00048844	0	0	2.00048844	0	1.00012209	0	0	0	0	1.00012209	0	0
ENSDARG00000008186	0	0	0	0	0	0	0	0	0	0	0	0	0	0	0	0	0	0	0	0	0	0	0	0	0	0	0	0	0	0	0	0	0	0	0	0	0	0	0	0	0	0	0	0	0	0	0	0	0
ENSDARG00000008188	1.00012209	0	0	0	0	0	0	0	0	1.00012209	0	0	0	0	0	0	0	7.005988269	1.00012209	0	0	1.00012209	2.00048844	0	0	0	0	0	0	0	1.00012209	1.00012209	0	0	0	0	1.00012209	0	0	0	0	0	0	0	0	0	2.00048844	0	0
ENSDARG00000008191	0	0	1.00012209	0	0	0	0	0	0	0	0	0	0	0	0	0	0	1.00012209	0	0	0	0	0	0	0	0	0	0	0	0	0	0	0	0	0	0	0	0	0	1.00012209	0	0	0	0	0	0	0	0	0
ENSDARG00000008192	0	0	0	0	0	0	0	0	0	4.001954397	0	0	0	0	0	0	0	0	0	0	0	0	0	0	0	0	0	0	0	0	0	0	0	0	0	0	0	0	0	0	0	0	0	0	0	0	0	0	0
ENSDARG00000008200	0	0	0	0	0	0	0	0	0	1.00012209	0	0	0	0	0	0	0	1.00012209	0	0	0	0	0	0	0	0	0	0	0	0	1.00012209	0	0	0	0	0	0	0	0	0	0	0	0	0	0	0	2.00048844	0	0
ENSDARG00000008212	0	0	0	0	0	0	0	0	0	0	0	0	0	0	0	0	0	1.00012209	0	0	0	0	2.00048844	0	0	0	0	0	0	0	0	0	0	0	0	0	0	0	0	0	0	0	0	0	0	0	1.00012209	0	0
ENSDARG00000008218	0	0	0	0	0	0	0	0	0	1.00012209	0	2.00048844	0	0	2.00048844	0	0	0	0	0	0	0	0	0	1.00012209	0	0	0	0	0	0	0	0	0	0	0	0	0	0	0	0	0	0	0	0	0	0	0	0
ENSDARG00000008224	1.00012209	0	0	0	0	0	0	1.00012209	0	1.00012209	0	0	0	1.00012209	2.00048844	0	0	4.001954397	0	0	0	0	1.00012209	0	1.00012209	0	0	0	0	1.00012209	0	1.00012209	0	0	0	1.00012209	1.00012209	0	1.00012209	0	0	1.00012209	0	0	0	0	1.00012209	0	0
ENSDARG00000008235	0	0	0	0	0	0	0	0	0	0	0	0	0	0	0	0	0	0	0	0	0	0	0	0	0	0	0	0	0	0	0	0	0	0	0	0	0	0	0	0	0	0	0	0	0	0	0	0	0
ENSDARG00000008237	0	0	2.00048844	0	0	0	0	1.00012209	0	0	0	0	0	0	2.00048844	0	0	7.005988269	2.00048844	0	0	0	2.00048844	0	0	0	0	0	0	0	0	0	0	0	0	0	0	0	0	0	0	0	0	0	0	0	1.00012209	0	0
ENSDARG00000008238	0	0	0	0	0	0	0	0	0	0	0	0	0	0	0	0	0	0	0	0	0	0	0	0	0	0	0	0	0	0	0	0	0	0	0	0	0	0	0	0	0	0	0	0	0	0	0	0	0
ENSDARG00000008239	0	0	0	0	0	0	0	0	0	0	0	0	0	0	0	0	0	0	0	0	0	0	0	0	0	0	0	0	0	0	0	0	0	0	0	0	0	0	0	0	0	0	0	0	0	0	0	0	0
ENSDARG00000008243	1.00012209	0	0	0	0	0	0	0	0	2.00048844	0	0	0	0	0	0	0	1.00012209	2.00048844	0	0	0	3.00109917	0	1.00012209	0	0	0	0	0	2.00048844	2.00048844	2.00048844	0	0	0	0	0	0	0	0	0	0	0	0	0	4.001954397	0	0
ENSDARG00000008247	0	0	0	0	0	0	0	0	0	0	0	0	0	0	0	0	0	0	0	0	0	0	0	0	0	0	0	0	0	0	0	0	0	0	0	0	0	0	0	1.00012209	0	0	0	0	0	0	0	0	0
ENSDARG00000008255	3.00109917	0	0	0	0	0	0	0	0	2.00048844	0	1.00012209	0	0	1.00012209	0	0	2.00048844	0	0	0	0	2.00048844	0	0	0	0	0	0	0	1.00012209	0	1.00012209	0	1.00012209	0	0	0	0	0	0	0	0	0	0	0	1.00012209	0	0
ENSDARG00000008275	0	0	0	0	0	0	0	2.00048844	0	0	0	0	0	0	1.00012209	0	0	1.00012209	0	0	0	0	0	0	0	0	0	0	0	0	0	0	0	0	0	0	0	0	0	0	0	0	0	0	0	0	0	0	0
ENSDARG00000008279	0	0	0	0	0	0	0	0	0	0	0	0	0	0	0	0	0	0	0	0	0	0	0	0	0	0	0	0	0	0	0	0	0	0	0	0	0	0	0	0	0	0	0	0	0	0	0	0	0
ENSDARG00000008287	0	1.00012209	0	0	0	0	0	0	0	0	0	0	0	0	0	0	0	0	0	0	0	0	0	0	0	0	0	0	0	0	0	0	0	0	0	0	0	0	0	1.00012209	0	0	0	0	0	0	0	0	0
ENSDARG00000008292	3.00109917	1.00012209	0	0	0	0	0	4.001954397	0	18.03966704	0	2.00048844	0	0	3.00109917	0	0	13.02067364	0	0	0	0	13.02067364	0	1.00012209	0	0	0	0	0	2.00048844	0	2.00048844	3.00109917	0	0	1.00012209	0	0	13.02067364	0	0	0	0	0	0	12.01761253	0	0
ENSDARG00000008305	0	0	0	0	0	0	0	0	0	3.00109917	0	0	0	0	0	0	0	0	8.007822687	0	0	0	3.00109917	0	0	0	0	0	0	0	0	0	0	0	1.00012209	0	0	0	0	0	0	0	0	0	0	0	3.00109917	0	0
ENSDARG00000008310	0	0	0	0	0	1.00012209	2.00048844	2.00048844	0	9.009902203	0	0	1.00012209	0	2.00048844	0	0	2.00048844	0	0	0	0	0	0	0	0	0	0	0	0	1.00012209	2.00048844	4.001954397	0	3.00109917	0	2.00048844	0	0	1.00012209	0	0	0	0	0	0	1.00012209	0	0
ENSDARG00000008322	0	0	0	0	0	0	0	0	0	0	0	0	0	0	0	0	0	1.00012209	0	0	0	0	0	0	0	0	0	0	0	0	0	0	0	0	1.00012209	0	0	0	0	0	0	0	0	0	0	0	0	0	0
ENSDARG00000008329	0	0	0	0	0	0	0	0	1.00012209	1.00012209	0	0	0	0	0	0	0	1.00012209	1.00012209	0	0	0	0	0	0	0	0	0	0	0	0	0	0	0	0	0	0	0	0	1.00012209	0	0	0	0	0	0	0	0	0
ENSDARG00000008336	0	0	0	0	0	0	0	0	0	0	0	0	0	0	0	0	0	3.00109917	0	0	0	0	1.00012209	0	0	0	0	0	0	0	0	0	0	0	0	0	0	0	0	0	0	0	0	0	0	0	1.00012209	0	0
ENSDARG00000008350	0	0	0	0	0	0	0	0	0	0	0	0	0	0	0	0	0	0	0	0	0	0	0	0	0	0	0	0	0	0	0	0	0	0	0	0	0	0	0	0	0	0	0	0	0	0	0	0	0
ENSDARG00000008359	0	0	0	0	0	0	1.00012209	0	0	1.00012209	0	0	0	0	3.00109917	0	0	17.03537624	1.00012209	0	0	0	29.10314829	0	1.00012209	0	0	0	0	0	3.00109917	5.003054244	0	0	3.00109917	0	2.00048844	0	1.00012209	0	0	0	0	0	0	1.00012209	44.23803433	0	0
ENSDARG00000008363	5.003054244	0	0	0	1.00012209	0	0	2.00048844	0	9.009902203	0	0	0	0	1.00012209	0	0	15.02753306	2.00048844	0	0	1.00012209	2.00048844	0	2.00048844	0	0	0	0	0	3.00109917	1.00012209	0	0	6.004398828	1.00012209	2.00048844	0	0	11.01479701	0	0	0	0	0	0	11.01479701	1.00012209	0
ENSDARG00000008366	0	0	0	0	0	0	0	0	0	0	0	0	0	0	0	0	0	1.00012209	0	0	0	0	0	0	0	0	0	0	0	0	0	0	0	0	0	0	0	0	0	0	0	0	0	0	0	0	0	0	0
ENSDARG00000008370	0	0	0	0	1.00012209	0	0	2.00048844	0	0	0	0	0	1.00012209	0	0	0	0	0	0	0	0	0	0	1.00012209	0	0	0	0	0	0	0	0	0	2.00048844	0	2.00048844	0	0	0	0	0	0	0	0	0	4.001954397	0	0
ENSDARG00000008372	0	0	0	0	0	0	0	0	0	0	0	0	0	0	0	0	0	0	0	0	0	0	0	0	0	0	0	0	0	0	0	0	0	0	0	0	0	0	0	0	0	0	0	0	0	0	1.00012209	0	0
ENSDARG00000008377	1.00012209	2.00048844	0	0	0	0	0	3.00109917	0	1.00012209	0	0	0	0	1.00012209	0	0	5.003054244	0	0	0	0	0	0	0	0	0	0	0	0	1.00012209	0	0	0	0	0	0	0	0	1.00012209	0	0	0	0	0	0	1.00012209	0	0
ENSDARG00000008380	0	0	0	0	0	0	0	0	0	0	0	0	0	0	0	0	0	1.00012209	1.00012209	0	0	0	0	0	1.00012209	0	0	0	0	0	0	0	0	0	0	0	0	0	0	0	0	1.00012209	0	0	0	0	0	0	0
ENSDARG00000008383	2.00048844	0	0	0	1.00012209	0	0	4.001954397	0	5.003054244	0	0	0	0	0	0	0	10.01222694	1.00012209	0	0	1.00012209	7.005988269	0	0	0	0	0	0	0	1.00012209	1.00012209	0	0	4.001954397	0	2.00048844	0	0	1.00012209	0	0	0	0	0	0	13.02067364	0	0
ENSDARG00000008384	0	0	0	0	0	0	0	0	0	0	0	0	0	0	0	0	0	0	0	0	0	0	0	0	0	0	0	0	0	0	0	0	0	0	0	0	0	0	0	0	0	0	0	0	0	0	0	0	0
ENSDARG00000008388	0	0	0	0	0	0	0	3.00109917	0	0	0	0	0	0	0	0	0	12.01761253	0	0	0	0	0	0	0	0	0	0	0	0	0	0	0	0	0	0	0	0	0	2.00048844	0	0	0	0	0	0	3.00109917	0	0
ENSDARG00000008395	0	1.00012209	0	0	0	0	0	0	0	0	0	0	0	0	0	0	0	4.001954397	0	0	0	0	0	0	0	0	0	0	0	0	0	0	0	0	0	0	0	0	0	0	0	0	0	0	0	0	1.00012209	0	0
ENSDARG00000008396	0	0	0	0	0	0	0	0	0	0	0	0	0	0	0	0	0	0	0	0	0	0	0	0	0	0	0	0	0	0	0	0	0	0	0	0	0	0	0	0	0	0	0	0	0	0	0	0	0
ENSDARG00000008398	0	0	0	0	0	0	0	0	0	6.004398828	0	0	0	0	0	0	0	2.00048844	0	0	0	0	0	0	4.001954397	0	1.00012209	0	0	4.001954397	0	0	1.00012209	0	0	0	0	0	0	0	0	0	0	1.00012209	0	0	0	0	0
ENSDARG00000008407	0	0	0	0	0	0	0	0	0	5.003054244	0	0	0	0	0	0	0	0	0	0	0	0	0	0	2.00048844	0	0	0	0	1.00012209	0	0	0	0	0	0	0	0	0	0	0	5.003054244	0	0	0	0	0	0	0
ENSDARG00000008413	0	0	0	0	0	0	0	0	0	7.005988269	0	0	0	0	0	0	0	0	1.00012209	0	0	0	5.003054244	0	1.00012209	0	0	0	0	1.00012209	1.00012209	4.001954397	0	0	0	0	5.003054244	0	0	0	0	0	0	1.00012209	0	0	10.01222694	0	0
ENSDARG00000008414	0	0	0	0	0	0	0	0	0	0	0	0	0	0	1.00012209	0	0	0	0	0	0	0	0	0	0	0	0	0	0	0	0	0	0	0	0	0	0	0	0	0	0	0	0	0	0	0	0	0	0
ENSDARG00000008423	1.00012209	1.00012209	0	0	0	0	0	0	0	0	0	0	0	0	0	0	0	0	0	0	0	0	0	0	0	0	0	0	0	0	0	0	0	0	0	0	0	0	0	0	0	0	0	0	0	0	0	0	0
ENSDARG00000008433	0	0	0	0	0	0	0	0	0	13.02067364	0	0	0	0	0	0	0	0	0	0	0	1.00012209	0	0	0	0	0	0	0	0	0	0	0	1.00012209	0	0	0	0	0	0	0	0	0	1.00012209	0	0	0	0	0
ENSDARG00000008434	1.00012209	0	0	0	0	1.00012209	0	0	0	3.00109917	0	0	0	0	1.00012209	0	0	3.00109917	1.00012209	0	0	0	0	0	1.00012209	0	0	0	0	0	4.001954397	0	0	0	0	0	5.003054244	0	0	1.00012209	0	0	0	0	0	0	5.003054244	0	0
ENSDARG00000008439	0	0	0	0	0	0	0	0	0	0	0	0	0	0	0	0	0	0	0	0	0	0	0	0	0	0	0	0	0	0	3.00109917	0	0	0	0	0	0	0	0	0	0	0	0	0	0	0	0	0	0
ENSDARG00000008447	0	0	0	0	0	0	1.00012209	0	0	1.00012209	0	0	0	0	0	0	0	1.00012209	2.00048844	0	0	0	0	0	1.00012209	0	0	0	0	0	0	0	5.003054244	0	0	0	0	0	0	0	0	0	0	0	0	0	1.00012209	0	0
ENSDARG00000008454	0	0	0	0	0	0	0	0	0	1.00012209	0	0	0	0	0	0	0	0	0	0	0	0	0	0	0	0	0	0	0	0	0	0	0	0	0	0	0	0	0	0	0	0	0	0	0	0	0	0	0
ENSDARG00000008457	0	0	0	0	0	0	0	0	0	0	0	0	0	0	0	0	0	0	0	0	0	0	0	0	0	0	0	0	0	0	0	0	0	0	0	0	0	0	0	0	0	1.00012209	0	0	0	0	1.00012209	0	0
ENSDARG00000008461	0	0	0	0	0	0	0	0	0	1.00012209	0	0	0	0	0	0	0	0	0	0	0	0	0	0	0	0	0	0	0	0	0	0	0	0	0	0	0	0	0	0	0	0	0	0	0	0	0	0	0
ENSDARG00000008472	0	0	0	0	0	0	0	0	0	0	0	0	0	0	0	0	0	1.00012209	0	0	0	0	0	0	0	0	0	0	0	0	0	0	0	0	0	0	0	0	0	0	0	0	0	0	0	0	0	0	0
ENSDARG00000008480	0	0	0	0	0	0	0	1.00012209	0	0	0	0	0	0	0	0	0	0	0	0	0	0	1.00012209	0	0	0	0	0	0	0	0	0	0	0	0	0	0	0	1.00012209	2.00048844	0	0	0	0	0	0	0	0	0
ENSDARG00000008485	0	0	0	0	0	0	0	0	0	0	0	0	0	0	0	0	0	0	0	0	0	0	0	0	0	0	0	0	0	0	0	0	0	0	0	0	0	0	0	0	0	0	0	0	0	0	0	0	0
ENSDARG00000008487	0	0	0	0	0	0	0	0	0	0	0	0	0	0	0	0	0	1.00012209	0	0	0	0	0	0	0	0	0	0	0	0	0	0	0	0	0	0	0	0	0	0	0	0	0	0	0	0	0	0	0
ENSDARG00000008490	0	0	0	0	0	0	0	0	0	0	0	0	0	0	1.00012209	0	0	2.00048844	0	0	0	0	0	0	2.00048844	0	0	0	0	0	0	0	0	1.00012209	0	0	0	0	0	0	0	0	0	0	0	0	4.001954397	0	0
ENSDARG00000008491	0	0	0	0	0	0	0	0	0	1.00012209	0	0	0	0	0	0	0	1.00012209	0	0	0	0	0	0	0	0	0	0	0	0	0	0	0	0	0	0	0	0	0	0	0	0	0	0	0	0	0	0	0
ENSDARG00000008494	0	0	0	0	0	0	1.00012209	0	0	1.00012209	0	0	1.00012209	1.00012209	2.00048844	0	0	8.007822687	1.00012209	0	0	0	2.00048844	0	0	0	0	0	0	0	2.00048844	0	1.00012209	0	0	1.00012209	1.00012209	0	0	1.00012209	0	0	0	0	0	0	18.03966704	0	0
ENSDARG00000008502	2.00048844	1.00012209	0	1.00012209	0	1.00012209	0	2.00048844	0	3.00109917	0	0	0	0	1.00012209	0	0	2.00048844	1.00012209	0	0	0	1.00012209	0	0	0	0	0	0	0	1.00012209	0	1.00012209	0	0	0	0	0	0	1.00012209	0	0	0	0	0	0	4.001954397	0	0
ENSDARG00000008503	0	0	0	0	0	0	0	0	0	1.00012209	0	0	0	0	0	0	0	1.00012209	0	0	0	0	2.00048844	0	0	0	0	0	0	0	0	0	0	0	0	0	0	0	0	1.00012209	0	0	0	0	0	0	1.00012209	0	0
ENSDARG00000008548	0	0	0	0	0	0	0	0	0	0	0	0	0	0	0	0	0	0	0	0	0	0	2.00048844	0	0	0	0	0	0	0	0	0	0	0	0	0	0	0	0	0	0	0	0	0	0	0	0	0	0
ENSDARG00000008551	0	0	0	0	0	0	0	0	0	0	0	0	0	0	0	0	0	0	0	0	0	0	1.00012209	0	0	0	0	0	0	0	0	0	0	0	1.00012209	0	0	0	0	0	0	0	0	0	0	0	0	0	0
ENSDARG00000008560	0	0	0	0	0	0	0	0	0	0	0	0	0	0	0	0	0	0	0	0	0	0	0	0	1.00012209	0	0	0	0	0	0	0	0	0	0	0	0	0	0	0	0	0	0	0	0	0	0	0	0
ENSDARG00000008568	0	0	0	0	0	0	0	1.00012209	0	0	0	1.00012209	0	0	0	0	0	5.003054244	0	0	0	0	1.00012209	0	1.00012209	0	0	0	0	0	0	0	0	0	0	0	0	0	0	0	0	0	0	0	0	0	1.00012209	0	0
ENSDARG00000008573	0	0	0	0	0	0	0	1.00012209	0	0	0	0	0	0	0	0	0	2.00048844	0	0	0	0	0	0	0	0	0	0	0	0	0	0	0	0	0	0	0	0	0	2.00048844	0	0	0	0	0	0	0	0	0
ENSDARG00000008575	0	0	0	0	0	0	0	0	0	0	0	0	0	0	0	0	0	0	0	0	0	0	0	0	0	0	0	0	0	0	0	0	0	0	0	0	3.00109917	0	0	0	0	0	0	0	0	0	0	0	0
ENSDARG00000008592	0	0	0	0	0	0	0	0	0	0	0	0	0	0	1.00012209	0	0	1.00012209	0	0	0	0	1.00012209	0	0	0	0	0	0	0	0	0	0	0	0	0	0	0	0	0	0	0	0	0	0	0	2.00048844	0	0
ENSDARG00000008593	0	0	0	0	0	0	0	0	0	0	0	0	0	0	1.00012209	0	0	1.00012209	0	0	0	0	1.00012209	0	0	0	0	0	0	0	0	0	0	0	0	0	0	0	0	0	0	0	0	0	0	0	0	0	0
ENSDARG00000008623	0	0	0	0	0	0	0	0	0	0	0	0	0	0	0	0	0	0	0	0	0	0	0	0	0	0	0	0	0	0	0	0	0	0	0	0	0	0	0	0	0	0	0	0	0	0	0	0	0
ENSDARG00000008639	0	0	0	0	0	0	0	0	0	2.00048844	0	0	0	0	0	0	0	0	0	0	0	0	0	0	1.00012209	0	0	0	0	0	0	0	0	0	0	0	0	0	0	0	0	0	0	0	0	0	0	0	0
ENSDARG00000008660	0	0	0	0	0	0	0	0	0	0	0	0	0	0	0	0	0	0	1.00012209	0	0	0	0	0	0	0	0	0	0	0	0	0	0	0	0	0	0	0	0	0	0	0	0	0	0	0	0	0	0
ENSDARG00000008662	0	0	0	0	0	0	0	0	0	0	0	0	0	0	0	0	0	0	1.00012209	0	0	0	0	0	0	0	0	0	0	0	0	0	0	0	0	0	0	0	0	0	0	0	0	0	0	0	0	0	0
ENSDARG00000008678	1.00012209	0	0	0	0	0	0	0	0	1.00012209	0	0	0	0	0	0	0	7.005988269	1.00012209	0	0	0	0	0	0	0	0	0	0	0	0	2.00048844	0	0	0	0	0	0	0	0	0	0	0	0	0	0	2.00048844	0	0
ENSDARG00000008680	0	0	0	0	1.00012209	0	0	2.00048844	0	4.001954397	0	0	0	0	2.00048844	0	0	0	0	0	0	0	1.00012209	0	0	0	0	0	0	0	0	0	0	0	0	0	1.00012209	0	0	2.00048844	0	1.00012209	0	0	0	0	6.004398828	0	0
ENSDARG00000008697	0	0	0	0	0	0	0	0	0	1.00012209	0	0	0	0	0	0	0	0	0	0	0	0	0	0	0	0	0	0	0	0	0	0	0	0	0	0	0	0	0	3.00109917	0	0	0	0	0	0	0	0	0
ENSDARG00000008703	0	0	0	0	0	0	0	0	0	0	0	0	0	0	0	0	0	0	0	0	0	0	0	0	0	0	0	0	0	0	0	0	0	0	1.00012209	0	0	0	0	0	0	0	0	0	0	0	1.00012209	0	0
ENSDARG00000008706	0	0	0	0	0	0	1.00012209	1.00012209	0	1.00012209	0	0	1.00012209	0	0	0	0	3.00109917	0	0	0	0	0	0	1.00012209	0	0	0	0	0	2.00048844	1.00012209	1.00012209	1.00012209	0	0	1.00012209	0	0	1.00012209	0	0	0	0	0	0	2.00048844	0	0
ENSDARG00000008723	0	0	0	0	0	0	0	0	0	0	0	0	0	0	0	0	0	0	0	0	0	0	0	0	0	0	0	0	0	0	0	0	0	0	0	0	0	0	0	0	0	0	0	0	0	0	0	0	0
ENSDARG00000008727	1.00012209	0	0	0	0	0	0	0	0	0	0	0	0	0	0	0	0	0	0	0	0	0	0	0	0	0	0	0	0	0	0	0	0	0	0	0	0	0	0	0	0	0	0	0	0	0	1.00012209	0	0
ENSDARG00000008732	0	0	0	0	0	0	0	0	0	0	0	0	0	0	0	0	0	0	0	0	0	0	0	0	0	0	0	0	0	0	0	0	0	0	0	0	0	0	0	0	0	0	0	0	0	0	0	0	0
ENSDARG00000008735	5.003054244	0	0	0	0	0	0	2.00048844	0	2.00048844	0	0	0	0	1.00012209	0	0	2.00048844	0	0	0	1.00012209	0	0	0	0	0	0	0	0	0	1.00012209	0	0	1.00012209	0	0	0	0	0	0	1.00012209	0	0	0	0	2.00048844	0	0
ENSDARG00000008740	0	0	0	0	0	0	0	1.00012209	0	1.00012209	0	0	0	0	0	0	0	1.00012209	0	0	0	0	0	0	0	0	0	0	0	0	2.00048844	1.00012209	1.00012209	0	0	0	0	0	0	0	0	0	0	0	0	0	0	0	0
ENSDARG00000008748	2.00048844	0	0	1.00012209	0	0	0	4.001954397	0	0	0	0	0	0	1.00012209	1.00012209	0	5.003054244	0	0	0	0	1.00012209	0	0	0	0	0	0	0	3.00109917	1.00012209	0	0	0	0	1.00012209	0	0	0	0	0	0	0	0	0	4.001954397	0	0
ENSDARG00000008757	0	0	0	0	0	1.00012209	0	1.00012209	0	0	0	0	0	0	0	0	0	3.00109917	4.001954397	0	0	0	0	0	0	0	0	0	0	0	0	1.00012209	0	0	0	0	0	0	0	0	0	0	0	0	0	0	4.001954397	0	0
ENSDARG00000008765	0	0	0	0	0	0	0	1.00012209	0	0	0	0	0	0	0	0	0	3.00109917	0	0	0	0	0	0	0	0	0	0	0	0	0	0	0	0	0	0	0	0	0	0	0	0	0	0	0	0	1.00012209	0	0
ENSDARG00000008767	0	0	0	0	0	0	0	0	0	0	0	0	0	0	0	0	0	0	0	0	0	0	0	0	0	0	0	0	0	0	0	0	0	0	0	0	0	0	0	0	0	0	0	0	0	0	0	0	0
ENSDARG00000008784	0	0	0	0	0	0	0	0	0	0	0	0	0	0	0	0	0	0	0	0	0	0	0	0	0	0	0	0	0	0	0	1.00012209	0	0	0	0	0	0	0	0	0	0	0	0	0	0	0	0	0
ENSDARG00000008785	1.00012209	0	0	0	0	0	0	0	0	30.11040269	0	0	0	0	0	0	0	5.003054244	0	0	0	1.00012209	2.00048844	0	1.00012209	0	0	0	0	1.00012209	0	0	0	0	0	3.00109917	0	0	0	0	0	1.00012209	0	0	0	0	2.00048844	0	0
ENSDARG00000008790	0	0	0	0	0	0	0	0	0	0	0	0	0	0	0	0	0	0	0	0	0	0	0	0	0	0	0	0	0	0	0	0	0	0	0	0	0	0	0	0	0	0	0	0	0	0	0	0	0
ENSDARG00000008803	0	0	0	0	0	0	0	0	0	0	0	0	0	0	0	0	0	3.00109917	0	0	0	0	0	0	0	0	0	0	0	0	0	0	0	0	0	0	0	0	0	0	0	0	0	0	0	0	2.00048844	0	0
ENSDARG00000008805	0	0	0	0	0	0	0	0	0	0	0	0	0	0	0	0	0	0	0	0	0	0	0	0	0	0	0	0	0	0	0	0	0	0	0	0	0	0	0	0	0	0	0	0	0	0	0	0	0
ENSDARG00000008808	0	0	0	0	0	0	0	0	0	0	0	0	0	0	0	0	0	4.001954397	0	0	0	0	0	0	0	0	0	0	0	0	0	0	0	0	0	0	0	0	0	0	0	0	0	0	0	0	0	0	0
ENSDARG00000008811	0	0	0	0	0	0	0	0	0	0	0	0	0	0	0	0	0	6.004398828	1.00012209	0	0	0	0	0	0	0	0	0	0	0	2.00048844	0	0	0	0	0	0	0	0	0	0	0	0	0	0	0	2.00048844	0	0
ENSDARG00000008816	1.00012209	0	0	0	0	0	0	0	0	0	0	0	0	0	0	0	0	7.005988269	1.00012209	0	0	0	1.00012209	0	0	0	0	0	0	0	1.00012209	0	2.00048844	0	2.00048844	0	0	0	0	4.001954397	0	0	0	0	0	0	2.00048844	0	0
ENSDARG00000008818	0	0	0	0	0	0	0	0	0	0	0	0	0	0	0	0	0	0	0	0	0	0	0	0	0	0	0	0	0	0	0	0	0	0	0	0	0	0	0	0	0	0	0	0	0	0	0	0	0
ENSDARG00000008832	0	0	0	0	0	0	0	0	0	0	0	0	0	0	0	0	0	1.00012209	1.00012209	0	0	0	2.00048844	0	0	0	0	0	0	0	0	0	0	0	1.00012209	0	0	0	0	1.00012209	0	0	0	0	0	0	0	0	0
ENSDARG00000008840	0	0	0	0	0	0	0	1.00012209	0	2.00048844	0	0	0	0	0	0	0	0	0	0	0	0	0	0	0	0	0	0	0	0	0	0	0	0	0	0	0	0	0	0	0	0	0	0	0	0	0	0	0
ENSDARG00000008849	0	0	0	0	0	0	0	0	0	0	0	0	0	0	0	0	0	0	0	0	0	0	0	0	0	0	0	0	0	0	0	0	0	0	0	0	0	0	0	0	0	0	0	0	0	0	0	0	0
ENSDARG00000008852	0	0	2.00048844	0	0	0	0	0	0	0	0	0	0	0	0	0	0	0	0	0	0	0	0	0	0	0	0	0	0	0	0	0	0	0	0	0	0	0	0	0	0	0	0	0	0	0	0	0	0
ENSDARG00000008858	0	0	0	0	0	0	0	0	0	0	0	0	0	0	1.00012209	0	0	6.004398828	0	0	0	0	0	0	0	0	0	0	0	0	0	0	2.00048844	0	0	0	1.00012209	0	0	2.00048844	0	0	0	0	0	0	1.00012209	0	0
ENSDARG00000008859	0	0	0	0	0	0	1.00012209	0	0	4.001954397	0	0	0	0	0	0	0	0	3.00109917	0	0	0	0	0	0	0	0	0	0	0	0	0	0	0	3.00109917	0	0	0	0	0	0	0	0	0	0	0	1.00012209	0	0
ENSDARG00000008867	8.007822687	1.00012209	0	0	0	0	1.00012209	6.004398828	0	6.004398828	0	1.00012209	0	0	1.00012209	0	0	14.02398044	3.00109917	0	0	0	5.003054244	1.00012209	0	0	1.00012209	1.00012209	0	0	2.00048844	4.001954397	3.00109917	0	2.00048844	0	2.00048844	0	0	3.00109917	0	0	0	1.00012209	0	0	11.01479701	0	0
ENSDARG00000008880	0	0	0	0	0	0	0	0	0	7.005988269	0	0	0	0	0	0	0	0	0	0	0	0	0	0	2.00048844	0	0	0	0	0	0	0	0	0	0	0	0	0	0	0	0	1.00012209	0	0	0	0	0	0	0
ENSDARG00000008884	0	0	0	0	0	0	0	0	0	1.00012209	0	0	0	0	0	0	0	3.00109917	0	0	0	0	0	0	0	0	0	0	0	0	1.00012209	0	0	0	0	0	0	0	0	0	0	0	0	0	0	0	0	0	0
ENSDARG00000008887	0	0	0	0	0	0	0	0	0	0	0	0	0	0	0	0	0	0	0	0	0	0	0	0	0	0	0	0	0	0	0	0	0	0	0	0	0	0	0	0	0	0	0	0	0	0	0	0	0
ENSDARG00000008890	0	0	0	0	0	0	0	0	0	0	0	0	0	0	0	1.00012209	0	2.00048844	1.00012209	0	0	0	0	0	0	0	0	0	0	0	0	0	0	0	0	0	0	0	0	0	0	0	0	0	0	0	0	0	0
ENSDARG00000008904	0	0	0	0	0	0	0	0	0	8.007822687	0	0	0	0	2.00048844	0	0	1.00012209	0	0	0	0	1.00012209	0	0	0	0	0	0	0	0	1.00012209	0	0	1.00012209	0	0	0	0	1.00012209	0	0	0	0	0	0	1.00012209	0	0
ENSDARG00000008906	0	0	0	0	0	0	0	1.00012209	0	0	0	0	0	0	0	0	0	0	0	0	0	0	0	0	0	0	0	0	0	0	1.00012209	0	0	0	0	0	0	0	0	0	0	0	0	0	0	0	0	0	0
ENSDARG00000008912	0	0	0	0	0	0	0	0	0	0	0	0	0	0	0	0	0	0	0	0	0	0	0	0	0	0	0	0	0	0	0	0	0	0	0	0	0	0	0	0	0	0	0	0	0	0	0	0	0
ENSDARG00000008915	0	0	0	0	0	0	0	0	0	0	0	0	0	0	0	0	0	2.00048844	0	0	0	0	0	0	0	0	0	0	0	0	0	0	1.00012209	0	0	0	0	0	0	0	0	0	0	0	0	0	0	0	0
ENSDARG00000008921	0	0	0	0	0	0	0	0	0	0	0	0	0	0	0	0	0	0	0	0	0	0	0	0	0	0	0	0	0	0	0	0	0	0	0	0	0	0	0	0	0	0	0	0	0	0	0	0	0
ENSDARG00000008931	0	0	0	0	0	0	0	0	0	0	0	0	0	0	0	0	0	0	0	0	0	0	0	0	0	0	0	0	0	0	0	0	0	0	0	0	0	0	0	0	0	0	0	0	0	0	0	0	0
ENSDARG00000008936	0	0	0	0	0	0	0	1.00012209	0	0	0	0	0	0	0	0	0	4.001954397	1.00012209	0	0	0	0	0	0	0	0	0	0	0	0	1.00012209	2.00048844	0	0	0	0	0	0	0	0	1.00012209	0	0	0	0	3.00109917	0	0
ENSDARG00000008937	0	0	0	0	0	0	0	0	0	5.003054244	0	0	0	0	0	0	0	14.02398044	0	0	0	0	0	0	0	0	0	0	0	0	0	0	0	0	0	0	0	0	0	0	0	1.00012209	0	0	0	0	1.00012209	0	0
ENSDARG00000008946	0	0	0	0	0	0	0	0	0	0	0	0	0	0	0	0	0	0	0	0	0	0	0	0	0	0	0	0	0	0	0	0	0	0	0	0	0	0	0	0	0	0	0	0	0	0	0	0	0
ENSDARG00000008947	0	0	0	0	0	0	0	1.00012209	0	1.00012209	0	0	0	1.00012209	0	0	0	0	3.00109917	0	0	0	0	0	0	0	0	0	0	0	1.00012209	2.00048844	1.00012209	0	2.00048844	1.00012209	0	0	0	1.00012209	0	0	0	0	0	0	0	0	0
ENSDARG00000008953	0	0	0	0	0	0	0	0	0	0	0	0	0	0	0	0	0	0	0	0	0	0	0	0	0	0	0	0	0	0	0	0	0	0	0	0	0	0	0	0	0	0	0	0	0	0	2.00048844	0	0
ENSDARG00000008966	0	0	0	0	0	0	0	0	0	1.00012209	0	0	0	0	0	0	0	0	0	0	0	0	1.00012209	0	0	0	0	0	0	0	0	0	0	0	0	0	0	0	0	0	0	0	0	0	0	0	1.00012209	0	0
ENSDARG00000008976	0	0	0	0	0	0	0	0	0	0	0	0	0	0	0	0	0	1.00012209	1.00012209	0	0	0	1.00012209	0	0	0	0	0	0	0	0	0	0	0	0	0	2.00048844	0	0	0	0	0	0	0	0	0	2.00048844	0	0
ENSDARG00000008979	0	0	0	0	0	0	0	0	0	2.00048844	0	0	0	0	2.00048844	0	0	1.00012209	0	0	0	0	0	0	0	0	0	0	0	0	0	0	0	0	0	0	0	0	0	0	0	0	0	0	0	0	0	0	0
ENSDARG00000008982	0	0	0	0	0	1.00012209	0	0	0	40.19659345	0	0	0	0	0	0	0	0	0	0	0	2.00048844	1.00012209	1.00012209	3.00109917	0	0	0	0	0	0	4.001954397	0	0	0	0	0	0	0	0	0	1.00012209	0	0	0	0	0	0	0
ENSDARG00000008983	0	0	0	0	0	0	0	0	0	0	0	0	0	0	0	0	0	0	0	0	0	0	0	0	0	0	0	0	0	0	1.00012209	0	0	0	0	0	0	0	0	1.00012209	0	0	0	0	0	0	1.00012209	0	0
ENSDARG00000009001	0	0	0	0	0	0	0	0	0	1.00012209	0	1.00012209	0	0	0	0	0	10.01222694	1.00012209	0	0	0	0	0	0	0	0	0	0	0	0	0	0	0	1.00012209	0	0	0	0	0	0	0	0	0	0	0	0	0	0
ENSDARG00000009014	0	0	0	0	0	0	0	0	0	0	0	0	0	0	0	0	0	46.26025111	0	0	0	0	0	0	0	0	0	0	0	1.00012209	0	0	0	0	0	0	0	0	0	0	0	0	0	0	0	0	2.00048844	0	0
ENSDARG00000009017	0	0	0	0	0	0	0	0	0	0	0	0	0	0	0	0	0	0	0	0	0	0	0	0	0	0	0	0	0	0	0	0	0	0	0	0	0	0	0	0	0	0	0	0	0	0	0	0	0
ENSDARG00000009020	0	0	0	0	0	0	0	0	0	0	0	0	0	0	0	0	0	0	0	0	0	0	0	0	0	0	0	0	0	0	0	0	0	0	0	0	0	0	0	0	0	0	0	0	0	0	0	0	0
ENSDARG00000009023	0	0	0	0	0	0	0	0	0	0	0	0	1.00012209	0	0	0	0	0	0	0	0	0	1.00012209	0	0	0	0	0	0	0	2.00048844	0	0	1.00012209	0	0	0	0	0	0	0	1.00012209	0	0	0	0	1.00012209	0	0
ENSDARG00000009026	0	0	0	0	0	0	0	1.00012209	0	6.004398828	0	0	0	0	0	0	0	0	0	0	0	0	0	0	0	0	0	0	0	0	0	0	0	0	0	0	0	0	0	0	0	0	0	0	0	0	0	0	0
ENSDARG00000009031	0	0	0	0	0	0	0	0	0	0	0	0	0	0	0	0	0	0	0	0	0	0	0	0	0	0	0	0	0	0	0	0	1.00012209	0	0	0	0	0	0	0	0	0	0	0	0	0	0	0	0
ENSDARG00000009040	0	0	0	0	0	0	0	0	0	3.00109917	0	0	0	0	0	0	0	0	0	0	0	0	0	0	0	0	0	0	0	0	0	0	0	0	0	0	0	0	0	0	0	0	0	0	0	0	0	0	0
ENSDARG00000009074	0	0	0	0	0	0	0	0	0	0	0	0	0	0	0	0	0	0	0	0	0	0	0	0	0	0	0	0	0	0	0	0	0	0	0	0	0	0	0	0	0	0	0	0	0	0	0	0	0
ENSDARG00000009081	0	0	0	0	0	0	0	0	0	0	0	0	0	0	0	0	0	1.00012209	0	0	0	0	0	0	0	0	0	0	0	0	0	0	0	0	0	0	0	0	0	1.00012209	0	0	0	0	0	0	0	0	0
ENSDARG00000009087	189.3080759	8.007822687	4.001954397	2.00048844	1.00012209	0	9.009902203	217.6833016	1.00012209	1.00012209	0	10.01222694	2.00048844	1.00012209	4.001954397	3.00109917	1.00012209	18.03966704	5.003054244	0	0	0	14.02398044	0	0	0	0	0	0	0	8.007822687	44.23803433	14.02398044	0	10.01222694	0	32.12565488	2.00048844	1.00012209	1.00012209	1.00012209	0	1.00012209	0	2.00048844	0	2.00048844	1.00012209	0
ENSDARG00000009106	0	1.00012209	1.00012209	1.00012209	0	0	2.00048844	4.001954397	0	13.02067364	0	0	2.00048844	0	5.003054244	0	0	7.005988269	3.00109917	0	0	1.00012209	3.00109917	0	3.00109917	0	0	0	0	5.003054244	0	1.00012209	5.003054244	1.00012209	5.003054244	0	2.00048844	0	0	2.00048844	0	5.003054244	0	0	0	0	5.003054244	0	0
ENSDARG00000009113	0	0	0	0	0	0	0	0	0	0	0	0	0	0	2.00048844	0	0	0	0	0	0	0	0	0	0	0	0	0	0	0	0	0	0	0	0	0	0	0	0	0	0	0	0	0	0	0	0	0	0
ENSDARG00000009123	2.00048844	1.00012209	0	0	0	0	0	0	0	1.00012209	0	12.01761253	0	0	5.003054244	0	0	0	5.003054244	0	0	0	45.24901792	0	1.00012209	0	0	0	0	0	2.00048844	6.004398828	2.00048844	0	1.00012209	0	14.02398044	0	0	0	0	0	0	0	0	0	63.48952308	0	0
ENSDARG00000009134	0	0	0	0	0	0	0	0	0	0	0	0	0	0	0	0	0	0	0	0	0	0	0	0	0	0	0	0	0	0	0	0	0	0	0	0	0	0	0	0	0	0	0	0	0	0	1.00012209	0	0
ENSDARG00000009136	0	0	0	0	0	0	0	1.00012209	0	0	0	0	0	0	0	0	0	2.00048844	0	0	0	0	3.00109917	0	0	0	0	0	0	0	1.00012209	0	2.00048844	0	0	0	0	0	0	1.00012209	0	0	0	0	0	0	4.001954397	0	0
ENSDARG00000009142	0	0	0	0	0	0	0	0	0	0	0	0	0	0	0	0	0	2.00048844	0	0	0	0	0	0	0	0	0	0	0	0	1.00012209	0	0	0	0	1.00012209	0	0	0	2.00048844	0	0	0	0	0	0	0	0	0
ENSDARG00000009160	1.00012209	0	0	0	0	0	0	0	0	0	0	0	0	0	0	0	0	0	0	0	0	0	0	0	0	0	0	0	0	0	0	0	0	0	0	0	0	0	0	0	0	0	0	0	0	0	0	0	0
ENSDARG00000009169	0	0	0	0	0	0	0	0	0	2.00048844	0	0	0	0	0	0	0	2.00048844	1.00012209	0	0	0	0	0	0	0	0	0	0	0	0	0	0	0	0	0	0	0	0	0	0	0	0	0	0	0	0	0	0
ENSDARG00000009170	0	0	0	0	0	0	0	0	0	0	0	0	0	0	0	0	0	0	1.00012209	0	0	0	0	0	0	1.00012209	0	0	0	0	0	0	0	0	0	0	0	0	0	0	0	0	0	0	0	0	0	0	0
ENSDARG00000009175	0	0	0	0	0	0	0	1.00012209	0	0	0	0	0	0	0	0	0	1.00012209	0	0	0	0	0	0	1.00012209	0	0	0	0	0	0	0	0	0	0	0	0	0	0	2.00048844	0	0	0	0	0	0	0	0	0
ENSDARG00000009178	0	0	0	0	0	0	0	0	0	0	0	0	0	0	0	0	0	1.00012209	0	0	0	0	0	0	0	0	0	0	0	0	0	0	0	0	0	0	0	0	0	0	0	0	0	0	0	0	0	0	0
ENSDARG00000009194	0	0	0	0	0	0	2.00048844	0	0	0	0	0	0	0	0	0	0	14.02398044	0	0	0	0	1.00012209	0	0	0	0	0	0	0	0	1.00012209	0	0	1.00012209	0	0	0	0	2.00048844	0	0	0	0	0	0	0	0	0
ENSDARG00000009208	0	0	0	0	0	0	0	1.00012209	0	2.00048844	0	0	0	0	0	0	0	0	0	0	0	0	0	0	2.00048844	0	0	0	0	0	0	0	0	0	0	0	0	0	0	0	0	0	0	0	0	0	1.00012209	0	0
ENSDARG00000009209	0	0	0	0	0	0	0	0	0	0	0	0	0	0	0	0	0	0	0	0	0	0	0	0	0	0	0	0	0	0	0	0	0	0	0	0	0	0	0	0	0	0	0	0	0	0	0	0	0
ENSDARG00000009212	45.24901792	5.003054244	2.00048844	2.00048844	1.00012209	0	7.005988269	60.44379237	0	10.01222694	0	17.03537624	1.00012209	0	18.03966704	0	0	137.2748558	16.03133162	0	0	0	63.48952308	0	7.005988269	1.00012209	0	0	0	1.00012209	16.03133162	15.02753306	35.15039348	5.003054244	25.07660581	2.00048844	21.05401772	0	0	34.14189908	0	3.00109917	0	1.00012209	0	0	122.8232279	0	0
ENSDARG00000009214	0	0	0	0	0	0	0	0	0	0	0	0	0	0	0	0	0	1.00012209	0	0	0	0	1.00012209	0	0	0	0	0	0	0	0	1.00012209	0	0	0	0	0	0	0	0	0	0	0	0	0	0	2.00048844	0	0
ENSDARG00000009217	0	1.00012209	0	0	0	0	0	3.00109917	0	1.00012209	0	0	0	0	0	0	0	1.00012209	0	0	0	0	1.00012209	0	0	0	0	0	0	0	1.00012209	1.00012209	1.00012209	0	3.00109917	1.00012209	0	0	0	0	0	1.00012209	0	0	0	0	3.00109917	0	0
ENSDARG00000009218	0	0	0	0	0	0	0	0	0	0	0	0	0	0	0	0	0	0	0	0	0	0	0	0	0	0	0	0	0	0	0	0	0	0	0	0	0	0	0	0	0	0	0	0	0	0	0	0	0
ENSDARG00000009250	0	0	0	0	0	1.00012209	0	1.00012209	0	7.005988269	0	0	1.00012209	0	0	0	0	1.00012209	0	0	0	0	0	0	0	0	0	0	0	0	0	0	1.00012209	0	0	0	0	0	0	1.00012209	0	0	0	0	0	0	3.00109917	0	0
ENSDARG00000009252	0	0	0	0	0	0	0	0	0	0	0	0	0	0	0	0	0	1.00012209	0	0	0	0	0	0	0	0	0	0	0	0	0	0	0	0	0	0	0	0	0	0	0	0	0	0	0	0	0	0	0
ENSDARG00000009253	1.00012209	0	0	0	0	0	0	0	0	1.00012209	0	0	0	0	0	0	0	4.001954397	0	0	0	0	0	0	0	0	0	0	0	0	2.00048844	0	0	0	0	0	1.00012209	0	0	1.00012209	0	0	0	0	0	0	0	0	0
ENSDARG00000009257	0	0	0	0	0	0	0	0	0	0	0	0	0	0	0	0	0	0	0	0	0	0	0	0	0	0	0	0	0	0	0	0	0	0	0	0	0	0	0	0	0	0	0	0	0	0	1.00012209	0	0
ENSDARG00000009262	0	0	0	0	0	0	0	0	0	0	0	1.00012209	0	0	1.00012209	0	0	2.00048844	0	0	0	0	0	0	1.00012209	0	0	0	0	0	0	0	0	0	0	0	0	0	0	1.00012209	0	0	0	0	0	0	0	0	0
ENSDARG00000009264	0	0	0	0	0	0	0	0	0	0	0	0	0	0	0	0	0	0	0	0	0	0	0	0	1.00012209	0	0	0	0	0	0	0	1.00012209	0	0	0	0	0	0	0	0	0	0	0	0	0	0	0	0
ENSDARG00000009266	0	0	0	0	0	0	0	4.001954397	0	0	0	0	0	0	0	0	0	0	2.00048844	0	0	0	0	0	0	0	0	0	0	0	0	0	0	0	0	0	0	0	0	0	0	0	0	0	0	0	2.00048844	0	0
ENSDARG00000009267	0	0	0	0	0	0	0	0	0	0	0	0	0	0	0	0	0	0	0	0	0	0	0	0	0	0	0	0	0	0	0	0	0	0	0	0	0	0	0	0	0	0	0	0	0	0	0	0	0
ENSDARG00000009273	0	0	0	0	0	0	0	0	0	0	0	0	0	0	0	0	0	0	0	0	0	0	0	0	0	0	0	0	0	0	0	0	0	0	0	0	0	0	0	0	0	0	0	0	0	0	0	0	0
ENSDARG00000009280	0	0	0	0	0	0	0	0	0	0	0	0	0	0	0	0	0	0	0	0	0	0	0	0	0	0	0	0	0	0	0	0	0	0	0	0	0	0	0	0	0	0	0	0	0	0	0	0	0
ENSDARG00000009285	7.005988269	2.00048844	0	0	0	2.00048844	2.00048844	20.04898766	0	30.11040269	0	3.00109917	0	0	5.003054244	0	0	89.98115772	14.02398044	0	0	0	40.19659345	0	6.004398828	0	0	0	0	0	10.01222694	4.001954397	17.03537624	0	4.001954397	0	4.001954397	0	0	22.05929444	0	0	0	0	0	0	54.35911682	0	0
ENSDARG00000009299	0	0	0	0	1.00012209	0	0	3.00109917	0	2.00048844	0	0	0	0	0	0	0	2.00048844	1.00012209	0	0	1.00012209	1.00012209	0	1.00012209	0	0	0	0	0	1.00012209	1.00012209	0	0	2.00048844	0	0	0	0	1.00012209	0	0	0	0	0	0	0	0	0
ENSDARG00000009313	5.003054244	0	0	0	0	0	0	2.00048844	0	0	0	0	0	0	0	0	0	2.00048844	0	0	0	0	0	0	0	0	0	0	0	0	2.00048844	0	0	0	0	0	0	0	0	0	0	0	0	0	0	0	4.001954397	0	0
ENSDARG00000009315	0	0	1.00012209	0	0	0	0	0	0	1.00012209	0	0	0	0	0	0	0	0	0	0	0	0	0	0	1.00012209	0	0	0	0	0	2.00048844	0	1.00012209	0	1.00012209	0	0	0	0	0	0	0	0	0	0	0	0	0	0
ENSDARG00000009336	5.003054244	1.00012209	0	0	0	0	0	0	0	0	0	0	0	0	0	0	0	0	0	0	0	0	0	0	0	0	0	0	0	1.00012209	0	0	0	1.00012209	0	0	0	0	0	1.00012209	0	0	0	0	0	0	0	0	0
ENSDARG00000009341	0	0	0	0	0	0	0	0	1.00012209	2.00048844	0	0	0	0	0	0	0	0	0	0	0	0	0	0	10.01222694	0	1.00012209	0	0	0	0	0	0	0	0	1.00012209	0	0	0	0	0	1.00012209	0	2.00048844	0	0	1.00012209	0	0
ENSDARG00000009342	0	0	0	0	0	0	0	2.00048844	0	0	0	0	0	0	1.00012209	0	0	8.007822687	1.00012209	0	0	0	2.00048844	0	2.00048844	0	0	0	0	1.00012209	1.00012209	0	0	0	0	0	0	0	0	1.00012209	0	0	0	0	0	0	3.00109917	0	0
ENSDARG00000009346	0	0	0	0	0	0	0	0	0	0	0	0	0	1.00012209	0	0	0	3.00109917	0	0	0	0	0	0	0	0	0	0	0	0	0	1.00012209	0	0	0	0	0	0	0	0	0	0	0	0	0	0	2.00048844	0	0
ENSDARG00000009350	0	0	0	0	0	0	0	0	0	0	0	0	0	0	0	0	0	1.00012209	0	0	0	0	1.00012209	0	0	0	0	0	0	0	0	0	2.00048844	0	0	0	0	0	0	0	0	0	0	0	0	0	0	0	0
ENSDARG00000009361	0	0	0	0	0	0	0	0	0	0	0	0	0	0	0	0	0	0	0	0	0	0	0	0	0	0	0	0	0	0	0	0	0	0	0	0	0	0	0	0	0	0	0	0	0	0	0	0	0
ENSDARG00000009387	0	0	0	0	0	0	0	0	0	0	0	0	0	0	0	0	0	0	0	0	0	0	0	0	0	0	0	0	0	0	0	0	0	0	0	0	0	0	0	0	0	0	0	0	0	0	3.00109917	0	0
ENSDARG00000009390	2.00048844	0	0	0	0	0	0	0	0	1.00012209	0	0	0	0	0	0	0	3.00109917	0	0	0	0	0	0	0	0	0	0	0	0	0	0	0	0	0	0	0	0	0	0	0	0	0	0	0	0	1.00012209	0	0
ENSDARG00000009401	0	1.00012209	1.00012209	0	0	0	0	77.73295522	0	0	0	0	0	0	0	0	0	4.001954397	1.00012209	0	0	0	2.00048844	0	0	0	0	0	0	1.00012209	0	0	0	0	0	0	0	1.00012209	0	2.00048844	0	1.00012209	0	0	0	0	0	1.00012209	0
ENSDARG00000009418	0	0	0	0	0	0	0	0	0	0	0	0	0	0	1.00012209	0	0	0	0	0	0	0	1.00012209	0	1.00012209	0	0	0	0	0	1.00012209	2.00048844	0	0	0	0	0	0	0	1.00012209	0	2.00048844	0	0	0	0	2.00048844	0	0
ENSDARG00000009430	0	0	0	0	0	0	0	0	0	0	0	0	0	0	0	0	0	0	0	0	0	0	0	0	0	0	0	0	0	0	0	0	0	0	0	0	0	0	0	0	0	0	0	0	0	0	0	0	0
ENSDARG00000009436	0	0	0	0	0	0	0	0	0	2.00048844	0	0	0	0	0	0	0	1.00012209	0	0	0	0	0	0	0	0	0	0	0	0	0	0	0	0	0	0	0	0	0	0	0	0	0	0	0	0	0	0	0
ENSDARG00000009447	4.001954397	4.001954397	2.00048844	1.00012209	1.00012209	5.003054244	1.00012209	3.00109917	1.00012209	187.2140063	0	0	3.00109917	0	1.00012209	0	0	19.04420413	1.00012209	0	0	1.00012209	14.02398044	0	14.02398044	0	0	0	0	0	4.001954397	5.003054244	4.001954397	2.00048844	5.003054244	0	3.00109917	1.00012209	0	2.00048844	0	6.004398828	3.00109917	1.00012209	0	0	15.02753306	0	0
ENSDARG00000009449	0	0	0	0	0	0	0	0	0	0	0	0	0	0	0	0	0	0	0	0	0	0	0	0	0	0	0	0	0	0	0	0	0	0	0	0	0	0	0	0	0	0	0	0	0	0	0	0	0
ENSDARG00000009459	0	0	0	0	0	0	0	1.00012209	0	1.00012209	0	0	0	0	0	0	0	0	0	0	0	0	0	0	0	0	0	0	0	0	0	0	0	0	0	0	0	0	0	0	0	0	0	0	0	0	0	0	0
ENSDARG00000009472	0	0	0	0	0	0	0	0	0	2.00048844	0	0	0	0	0	0	0	0	0	0	0	1.00012209	0	0	0	0	0	0	0	0	0	1.00012209	1.00012209	0	0	0	0	0	0	0	0	0	0	0	0	0	1.00012209	0	0
ENSDARG00000009473	0	0	0	0	0	1.00012209	0	1.00012209	0	0	0	0	0	0	0	0	0	0	0	0	0	0	0	0	0	0	0	0	0	0	0	0	2.00048844	0	0	0	0	0	0	0	0	0	0	0	0	0	1.00012209	0	0
ENSDARG00000009480	0	0	0	0	0	0	0	0	0	0	0	0	0	0	0	0	0	0	0	0	0	0	0	0	0	0	0	0	0	0	0	0	0	0	0	0	0	0	0	0	0	0	0	0	0	0	0	0	0
ENSDARG00000009482	0	0	0	0	0	0	0	0	0	0	0	0	0	0	0	0	0	1.00012209	0	0	0	0	1.00012209	0	0	0	0	0	0	0	0	0	0	0	0	0	0	0	0	0	0	0	0	0	0	0	0	0	0
ENSDARG00000009484	0	0	0	0	0	0	0	2.00048844	0	0	0	0	0	0	0	0	0	3.00109917	0	0	0	0	4.001954397	0	0	0	0	0	0	0	0	1.00012209	1.00012209	0	1.00012209	0	0	0	0	2.00048844	0	0	0	0	0	0	3.00109917	0	0
ENSDARG00000009488	0	0	0	0	0	0	0	0	0	0	0	0	0	0	0	0	0	0	0	0	0	0	0	0	0	0	0	0	0	0	0	0	0	0	0	0	0	0	0	0	0	0	0	0	0	0	0	0	0
ENSDARG00000009494	1.00012209	0	0	0	0	0	0	0	0	0	0	0	0	0	0	0	0	0	0	0	0	0	0	0	0	0	0	0	0	0	0	0	0	0	0	0	0	0	0	0	0	0	0	0	0	0	0	0	0
ENSDARG00000009499	0	0	0	0	0	0	0	0	0	0	0	0	0	0	0	0	0	1.00012209	0	0	0	0	0	0	0	1.00012209	0	0	0	0	1.00012209	0	0	0	0	0	1.00012209	0	0	0	0	0	0	0	0	0	2.00048844	0	0
ENSDARG00000009505	0	0	1.00012209	0	0	0	0	2.00048844	0	38.17736738	0	2.00048844	0	0	0	0	1.00012209	6.004398828	4.001954397	0	0	1.00012209	6.004398828	0	1.00012209	0	0	0	0	0	8.007822687	0	1.00012209	2.00048844	0	1.00012209	0	0	0	0	0	1.00012209	1.00012209	0	0	0	4.001954397	0	0
ENSDARG00000009510	0	0	0	0	0	1.00012209	0	0	0	1.00012209	0	0	0	0	0	0	0	0	0	0	0	0	0	0	1.00012209	0	0	0	0	0	0	0	0	0	0	0	0	0	0	0	0	1.00012209	0	0	0	0	0	0	0
ENSDARG00000009511	0	0	0	0	0	0	0	2.00048844	0	0	0	0	0	0	0	0	0	0	0	0	0	0	0	0	0	0	0	0	0	0	0	0	0	0	0	0	0	0	0	0	0	0	0	0	0	0	0	0	0
ENSDARG00000009524	0	0	0	0	0	0	0	1.00012209	0	0	0	0	0	0	2.00048844	0	0	1.00012209	1.00012209	0	0	0	0	0	0	0	0	0	0	0	0	0	1.00012209	0	0	0	0	0	0	0	0	0	0	0	0	0	0	0	0
ENSDARG00000009525	1.00012209	0	0	0	0	0	1.00012209	0	0	2.00048844	0	0	0	0	1.00012209	0	0	1.00012209	0	0	0	0	0	0	1.00012209	0	0	0	0	0	2.00048844	0	0	0	0	0	0	0	0	1.00012209	0	0	0	0	0	0	1.00012209	0	0
ENSDARG00000009534	3.00109917	0	0	0	0	0	1.00012209	0	0	3.00109917	0	1.00012209	0	0	1.00012209	1.00012209	0	16.03133162	4.001954397	0	0	1.00012209	11.01479701	0	0	0	0	0	0	1.00012209	4.001954397	7.005988269	2.00048844	0	2.00048844	0	2.00048844	0	0	0	0	0	0	0	0	1.00012209	8.007822687	0	0
ENSDARG00000009549	0	0	0	1.00012209	0	0	1.00012209	2.00048844	0	2.00048844	0	0	0	0	0	0	0	5.003054244	0	0	0	0	2.00048844	0	1.00012209	0	0	0	0	0	4.001954397	3.00109917	0	0	6.004398828	0	0	0	0	0	0	0	0	2.00048844	0	0	5.003054244	0	0
ENSDARG00000009557	0	0	0	0	0	0	0	0	0	0	0	0	0	0	0	0	0	0	0	0	0	0	0	0	0	0	0	0	0	0	0	0	0	0	0	0	0	0	0	0	0	0	0	0	0	0	0	0	0
ENSDARG00000009567	0	0	0	0	0	0	0	0	0	3.00109917	0	0	0	0	0	0	0	0	0	0	0	0	0	0	0	0	0	0	0	0	0	0	0	0	0	1.00012209	0	0	0	0	0	0	0	0	0	0	0	0	0
ENSDARG00000009582	0	0	0	0	0	0	0	0	0	0	0	0	0	0	0	0	0	0	0	0	0	0	0	0	0	0	0	0	0	0	0	0	0	0	0	0	0	0	0	0	0	0	0	0	0	0	0	0	0
ENSDARG00000009585	0	0	0	0	0	0	2.00048844	4.001954397	0	1.00012209	0	0	0	0	2.00048844	0	0	3.00109917	0	0	0	0	3.00109917	0	0	0	0	0	0	0	0	0	0	0	0	0	2.00048844	0	0	2.00048844	0	0	0	0	0	0	5.003054244	0	0
ENSDARG00000009594	0	0	0	0	0	0	0	1.00012209	0	2.00048844	0	1.00012209	0	0	0	0	0	2.00048844	5.003054244	0	0	0	0	0	1.00012209	0	0	0	0	0	7.005988269	0	0	0	0	0	0	0	0	0	0	0	0	0	0	0	0	0	0
ENSDARG00000009607	0	0	0	0	0	0	0	0	0	0	0	0	0	0	0	0	0	1.00012209	0	0	0	0	0	0	0	0	0	0	0	0	1.00012209	0	0	1.00012209	0	0	1.00012209	0	0	0	0	0	0	0	0	0	0	0	0
ENSDARG00000009610	0	0	0	0	0	0	0	0	0	0	0	0	0	0	0	0	0	0	0	0	0	0	0	0	0	0	0	0	0	0	1.00012209	2.00048844	0	0	0	0	0	0	0	0	0	0	0	0	0	0	0	0	0
ENSDARG00000009612	0	0	0	0	0	0	0	0	0	0	0	0	0	0	0	0	0	0	0	0	0	0	0	0	0	0	0	0	0	0	0	0	0	0	0	0	0	0	0	0	0	0	0	0	0	0	0	0	0
ENSDARG00000009624	0	0	0	0	0	0	0	0	0	1.00012209	0	0	0	0	0	0	0	0	0	0	0	0	0	0	0	0	0	0	0	0	0	0	0	0	0	0	0	0	0	0	0	0	0	0	0	0	0	0	0
ENSDARG00000009626	0	0	0	0	0	0	0	0	0	1.00012209	0	0	0	0	0	0	0	0	0	0	0	0	0	0	0	0	0	0	0	0	0	0	0	0	0	0	0	0	0	0	0	0	0	0	0	0	0	0	0
ENSDARG00000009629	1.00012209	0	0	0	0	0	0	0	0	0	0	0	0	0	0	0	0	0	0	0	0	0	0	0	0	0	0	0	0	0	0	0	0	0	0	0	0	0	0	0	0	0	0	0	0	0	0	0	0
ENSDARG00000009640	0	0	1.00012209	0	0	0	0	2.00048844	0	2.00048844	0	1.00012209	0	0	0	0	0	6.004398828	0	0	0	0	0	0	0	0	0	0	0	0	1.00012209	2.00048844	0	0	0	0	1.00012209	0	0	0	0	0	0	0	0	0	1.00012209	0	0
ENSDARG00000009653	0	0	0	0	0	0	0	0	0	0	0	0	0	0	0	0	0	0	0	0	0	0	0	0	0	0	0	0	0	0	0	0	0	0	0	0	0	0	0	0	0	0	0	0	0	0	0	0	0
ENSDARG00000009657	0	0	0	0	0	0	0	3.00109917	0	0	0	0	0	0	0	0	0	2.00048844	1.00012209	0	0	0	0	0	0	0	0	0	0	0	0	0	0	0	0	0	0	0	0	1.00012209	0	0	0	0	0	0	1.00012209	0	0
ENSDARG00000009673	0	0	0	0	0	0	0	0	0	0	0	0	0	0	0	0	0	0	0	0	0	0	0	0	0	0	0	0	0	0	0	0	0	0	0	0	0	0	0	0	0	0	0	0	0	0	0	0	0
ENSDARG00000009677	0	0	0	0	0	0	0	0	0	0	0	0	0	0	0	0	0	1.00012209	0	0	0	0	0	0	0	0	0	0	0	0	0	0	1.00012209	0	0	0	0	0	0	0	0	0	0	0	0	0	0	0	0
ENSDARG00000009681	0	0	0	0	0	0	0	0	0	1.00012209	0	0	0	0	0	0	0	0	0	0	0	0	0	0	0	0	0	0	0	0	0	0	0	0	0	0	0	0	0	0	0	0	0	0	0	0	0	0	0
ENSDARG00000009685	0	0	0	0	0	0	0	0	0	0	0	0	0	0	0	0	0	0	0	0	0	0	0	0	0	0	0	0	0	0	0	0	0	0	0	0	1.00012209	0	0	0	0	0	0	0	0	0	0	0	0
ENSDARG00000009689	0	0	1.00012209	0	0	0	0	0	0	2.00048844	0	0	0	0	0	0	0	1.00012209	0	0	0	0	0	0	1.00012209	0	0	0	0	0	0	0	0	0	0	0	0	0	0	0	0	0	0	0	0	0	0	0	0
ENSDARG00000009693	0	0	0	0	0	0	0	0	0	0	0	0	0	0	0	0	0	6.004398828	0	0	0	0	0	0	0	0	0	0	0	0	0	0	0	0	0	0	0	0	0	0	0	0	0	0	0	0	0	0	0
ENSDARG00000009702	1.00012209	1.00012209	0	0	0	0	0	3.00109917	0	0	0	0	0	0	1.00012209	0	0	0	0	0	0	0	0	0	0	0	0	0	0	0	1.00012209	2.00048844	0	0	0	0	1.00012209	0	0	0	0	0	0	0	0	0	0	0	0
ENSDARG00000009724	0	0	0	0	0	0	0	0	0	0	0	0	0	0	0	0	0	2.00048844	0	0	0	0	0	0	0	0	0	0	0	0	0	0	0	0	0	0	1.00012209	0	0	0	0	0	0	0	0	0	0	0	0
ENSDARG00000009727	0	0	0	0	0	0	0	0	0	3.00109917	0	0	0	0	0	0	0	0	0	0	0	0	0	0	0	0	0	0	0	0	0	0	0	0	0	0	0	0	0	0	0	0	0	0	0	0	4.001954397	0	0
ENSDARG00000009733	0	0	0	0	0	0	0	0	0	0	0	0	0	0	0	0	0	0	0	0	0	0	0	0	0	0	0	0	0	0	0	0	0	0	0	0	0	0	0	0	0	0	0	0	0	0	0	0	0
ENSDARG00000009735	0	0	0	0	0	0	1.00012209	0	0	0	0	0	1.00012209	0	0	0	0	1.00012209	0	0	0	0	1.00012209	0	0	0	0	0	0	0	0	0	0	0	0	0	0	0	0	0	0	0	0	0	0	0	4.001954397	0	0
ENSDARG00000009738	0	0	0	0	0	0	0	0	0	3.00109917	0	0	0	0	0	0	0	0	0	0	0	0	0	0	0	0	0	0	0	0	0	0	0	0	0	0	0	0	0	0	0	0	0	0	0	0	0	0	0
ENSDARG00000009740	0	0	0	0	0	0	1.00012209	0	0	0	0	0	0	0	0	0	0	1.00012209	0	0	0	0	0	0	2.00048844	0	0	0	0	0	0	0	0	0	0	0	0	0	0	0	0	0	0	0	0	0	2.00048844	0	0
ENSDARG00000009745	0	0	0	0	0	0	1.00012209	1.00012209	0	0	0	0	0	0	0	0	0	1.00012209	0	0	0	0	0	0	0	0	0	0	0	0	0	0	0	0	0	0	0	0	0	2.00048844	0	0	0	0	0	0	3.00109917	0	0
ENSDARG00000009748	0	0	0	0	0	0	0	0	0	0	0	0	0	0	0	0	0	0	0	0	0	0	0	0	0	0	0	0	0	0	0	0	1.00012209	0	0	0	0	0	0	0	0	0	0	0	0	0	0	0	0
ENSDARG00000009753	0	0	0	0	0	0	0	1.00012209	0	2.00048844	0	1.00012209	0	0	0	0	0	0	2.00048844	0	0	1.00012209	2.00048844	0	0	0	0	0	0	0	0	1.00012209	0	0	0	0	0	0	0	0	0	0	0	0	0	0	1.00012209	0	0
ENSDARG00000009754	0	0	0	0	0	0	0	1.00012209	0	2.00048844	0	0	0	0	0	0	0	1.00012209	0	0	0	0	0	0	0	0	0	0	0	0	1.00012209	1.00012209	0	0	0	0	0	0	0	0	0	0	0	0	0	0	1.00012209	0	0
ENSDARG00000009764	0	0	0	0	0	0	0	0	0	0	0	0	0	0	0	0	0	0	0	0	0	0	0	0	0	0	0	0	0	0	0	0	0	0	0	0	0	0	0	0	0	0	0	0	0	0	0	0	0
ENSDARG00000009771	0	0	0	0	0	0	2.00048844	0	0	1.00012209	0	0	0	0	1.00012209	0	0	3.00109917	0	0	0	0	0	0	0	0	0	0	0	0	0	0	0	0	1.00012209	0	0	0	0	0	0	0	0	0	0	0	1.00012209	0	0
ENSDARG00000009779	5.003054244	1.00012209	1.00012209	1.00012209	0	0	0	20.04898766	0	52.33289863	0	9.009902203	0	0	9.009902203	0	1.00012209	62.47402785	27.08938227	0	0	0	23.06481795	0	0	0	0	0	0	0	22.05929444	8.007822687	10.01222694	0	8.007822687	1.00012209	3.00109917	0	0	17.03537624	0	0	0	2.00048844	0	0	60.44379237	0	0
ENSDARG00000009782	0	0	0	0	0	0	0	0	0	0	0	0	0	0	2.00048844	0	0	0	0	0	0	0	0	0	0	0	0	0	0	0	0	0	0	0	0	0	1.00012209	0	0	1.00012209	0	0	0	0	0	0	13.02067364	0	0
ENSDARG00000009783	0	0	0	0	0	0	0	1.00012209	0	1.00012209	0	0	0	0	0	0	0	1.00012209	0	0	0	0	0	0	0	0	0	0	0	0	0	0	0	0	0	0	0	0	0	0	0	0	0	0	0	0	5.003054244	0	0
ENSDARG00000009789	0	0	0	0	0	0	0	0	0	1.00012209	0	0	0	0	1.00012209	0	0	2.00048844	0	0	0	0	0	0	0	0	0	0	0	1.00012209	0	0	0	0	0	1.00012209	0	0	0	0	0	1.00012209	0	0	0	0	1.00012209	0	0
ENSDARG00000009793	0	0	0	0	0	0	0	1.00012209	0	0	0	0	0	0	0	0	0	0	1.00012209	0	0	0	1.00012209	0	0	0	0	0	0	0	1.00012209	0	0	0	0	0	0	0	0	0	0	0	0	0	0	0	2.00048844	0	0
ENSDARG00000009796	0	0	0	0	0	0	0	0	0	0	0	0	0	0	0	0	0	0	0	0	0	0	0	0	0	0	0	0	0	0	0	0	0	0	0	0	0	0	0	1.00012209	0	0	0	0	0	0	0	0	0
ENSDARG00000009802	1.00012209	0	0	0	0	1.00012209	0	0	0	0	0	0	0	0	1.00012209	0	0	1.00012209	1.00012209	0	0	0	0	0	0	0	0	0	0	0	0	0	1.00012209	1.00012209	0	1.00012209	0	0	0	0	0	0	0	0	0	1.00012209	3.00109917	0	0
ENSDARG00000009806	0	0	0	0	0	0	0	0	0	0	0	0	0	0	0	0	0	0	0	0	0	0	1.00012209	0	0	0	0	0	0	0	0	0	1.00012209	0	0	0	0	0	0	0	0	0	0	0	0	0	0	0	0
ENSDARG00000009822	0	0	0	0	0	0	0	0	0	0	0	0	0	0	0	0	0	0	0	0	0	0	0	0	0	0	0	0	0	0	0	0	0	0	0	0	0	0	0	0	0	0	0	0	0	0	0	0	0
ENSDARG00000009823	0	0	0	0	0	0	0	0	0	0	0	0	0	0	0	0	0	0	0	0	0	0	0	0	0	0	0	0	0	0	0	0	0	0	0	0	0	0	0	0	0	0	0	0	0	0	0	0	0
ENSDARG00000009825	0	0	0	0	0	0	0	0	0	0	0	0	0	0	0	0	0	0	0	0	0	0	0	0	0	0	0	0	0	0	0	0	0	0	0	0	0	0	0	0	0	0	0	0	0	0	0	0	0
ENSDARG00000009830	1.00012209	2.00048844	1.00012209	0	1.00012209	4.001954397	1.00012209	3.00109917	1.00012209	15.02753306	0	1.00012209	1.00012209	0	1.00012209	0	0	56.38633785	6.004398828	0	0	1.00012209	4.001954397	0	6.004398828	0	0	0	0	0	5.003054244	3.00109917	5.003054244	0	5.003054244	0	0	0	1.00012209	4.001954397	0	3.00109917	0	0	0	1.00012209	30.11040269	0	1.00012209
ENSDARG00000009837	0	0	0	0	0	0	0	0	0	0	0	0	0	0	0	0	0	0	0	0	0	0	0	0	0	0	0	0	0	0	1.00012209	0	0	0	0	0	0	0	0	0	0	0	0	0	0	0	3.00109917	0	0
ENSDARG00000009839	0	0	0	0	0	0	0	0	0	0	0	0	0	0	0	0	0	0	0	0	0	0	0	0	0	0	0	0	0	0	0	0	0	0	0	0	0	0	0	0	0	0	0	0	0	0	0	0	0
ENSDARG00000009850	0	0	0	0	0	0	0	1.00012209	0	0	0	0	0	0	0	0	0	0	0	0	0	0	0	0	0	0	0	0	0	0	0	0	0	0	0	0	0	0	0	0	0	0	0	0	0	0	0	0	0
ENSDARG00000009851	0	0	0	0	0	0	0	0	1.00012209	0	0	0	0	0	0	0	0	0	0	0	0	0	0	0	0	0	0	0	0	0	0	0	0	0	0	0	0	0	0	0	0	0	0	0	0	0	1.00012209	0	0
ENSDARG00000009852	0	0	0	0	0	0	0	0	0	0	0	0	0	0	0	0	0	0	0	0	0	0	0	0	0	0	0	0	0	0	0	0	0	0	0	0	0	0	0	0	0	0	0	0	0	0	0	0	0
ENSDARG00000009862	0	0	0	0	0	0	0	0	0	0	0	0	0	0	0	0	0	0	0	0	0	0	0	0	0	0	0	0	0	0	0	0	0	0	0	0	0	0	0	0	0	0	0	0	0	0	0	0	0
ENSDARG00000009864	2.00048844	0	0	0	0	0	0	0	0	0	0	0	0	0	0	0	0	0	0	0	0	0	0	0	0	0	0	0	0	0	0	0	0	0	0	0	0	0	0	0	0	0	0	0	0	0	0	0	0
ENSDARG00000009867	0	0	0	0	0	0	0	0	0	6.004398828	0	0	0	0	0	0	0	0	0	0	0	1.00012209	0	0	0	0	0	0	0	1.00012209	0	0	0	0	0	0	0	0	0	0	0	0	0	0	0	0	0	0	0
ENSDARG00000009868	0	0	0	0	0	0	0	0	0	0	0	0	0	0	0	0	0	0	0	0	0	0	0	0	0	0	0	0	0	0	0	0	0	0	0	0	1.00012209	0	0	0	0	0	0	0	0	0	0	0	0
ENSDARG00000009870	1.00012209	0	0	0	0	0	0	0	0	0	0	0	0	0	0	0	0	0	0	0	0	0	0	0	0	0	0	0	0	0	0	0	0	0	0	0	0	0	0	0	0	0	0	0	0	0	0	0	0
ENSDARG00000009871	0	0	0	0	0	0	0	1.00012209	0	1.00012209	0	0	0	0	0	0	0	0	0	0	0	0	0	0	0	0	0	0	0	0	1.00012209	0	1.00012209	1.00012209	1.00012209	0	0	0	0	0	0	0	0	0	0	0	0	0	0
ENSDARG00000009881	2.00048844	0	0	0	1.00012209	0	0	0	0	24.07058837	0	3.00109917	0	0	0	2.00048844	0	22.05929444	2.00048844	0	0	1.00012209	8.007822687	0	1.00012209	0	0	0	0	0	5.003054244	16.03133162	10.01222694	0	2.00048844	0	0	0	0	0	0	0	1.00012209	0	0	0	29.10314829	0	1.00012209
ENSDARG00000009885	0	0	0	0	0	0	0	0	0	0	0	0	0	0	0	0	0	0	0	0	0	0	0	0	0	0	0	0	0	0	0	0	0	0	0	0	0	0	0	0	0	0	0	0	0	0	0	0	0
ENSDARG00000009886	2.00048844	0	0	0	0	0	0	2.00048844	0	2.00048844	0	1.00012209	0	0	0	0	0	2.00048844	1.00012209	0	0	0	0	0	0	0	0	0	0	0	1.00012209	1.00012209	0	0	0	0	1.00012209	0	0	1.00012209	0	0	0	0	0	0	0	0	0
ENSDARG00000009890	0	0	0	0	0	0	0	0	0	0	0	0	0	0	0	0	0	0	0	0	0	0	0	0	0	0	0	0	0	0	0	0	0	0	0	0	0	0	0	1.00012209	0	0	0	0	0	0	0	0	0
ENSDARG00000009899	1.00012209	0	0	0	0	0	0	0	0	0	0	0	0	0	0	0	0	7.005988269	1.00012209	0	0	0	5.003054244	0	0	1.00012209	0	0	0	0	0	0	0	0	0	0	0	0	0	1.00012209	0	0	0	0	0	0	1.00012209	0	0
ENSDARG00000009901	2.00048844	0	0	0	0	0	0	0	0	1.00012209	0	0	0	0	0	0	0	1.00012209	1.00012209	0	0	0	4.001954397	0	0	0	0	0	0	0	0	1.00012209	0	0	0	0	0	0	0	0	0	0	0	0	0	0	11.01479701	0	0
ENSDARG00000009922	0	0	0	0	0	0	0	0	0	0	0	0	0	0	0	0	0	0	0	0	0	0	0	0	0	0	0	0	0	0	0	0	0	0	0	0	0	0	0	0	0	0	0	0	0	0	0	0	0
ENSDARG00000009933	0	0	0	0	0	0	0	1.00012209	0	0	0	0	0	0	0	0	0	3.00109917	1.00012209	0	0	0	0	0	1.00012209	0	0	0	0	0	0	0	1.00012209	0	0	0	0	0	0	0	0	0	0	0	0	0	0	0	0
ENSDARG00000009939	0	0	0	0	0	0	0	0	0	2.00048844	0	0	0	0	1.00012209	0	0	1.00012209	0	0	0	1.00012209	1.00012209	0	0	0	0	0	0	0	1.00012209	0	0	0	0	0	0	0	0	0	0	0	0	0	0	0	0	0	0
ENSDARG00000009941	0	0	0	0	0	0	0	0	0	0	0	0	0	0	0	0	0	0	0	0	0	0	0	0	0	0	0	0	0	0	0	0	0	0	0	0	0	0	0	0	0	0	0	0	0	0	0	0	0
ENSDARG00000009942	0	0	0	0	0	0	0	0	0	0	0	0	0	0	0	0	0	0	0	0	0	0	0	0	0	0	0	0	0	0	0	0	0	0	0	0	0	0	0	0	0	0	0	0	0	0	0	0	0
ENSDARG00000009949	0	0	0	0	0	0	0	0	0	0	0	0	0	0	0	0	0	0	0	0	0	0	0	0	0	0	0	0	0	0	0	0	0	0	0	1.00012209	0	0	0	0	0	0	0	0	0	0	0	0	0
ENSDARG00000009950	1.00012209	0	0	0	0	0	0	2.00048844	0	2.00048844	0	0	0	0	1.00012209	0	0	3.00109917	0	0	0	0	3.00109917	0	0	0	0	0	0	0	0	1.00012209	0	1.00012209	1.00012209	0	0	0	0	0	0	1.00012209	0	0	0	0	1.00012209	0	0
ENSDARG00000009953	0	0	0	0	0	0	0	0	0	0	0	0	0	0	0	0	0	0	0	0	0	0	0	0	0	0	0	0	0	0	0	0	0	0	0	0	0	0	0	0	0	0	0	0	0	0	1.00012209	0	0
ENSDARG00000009958	0	0	0	0	0	0	0	0	0	0	0	0	0	0	0	0	0	0	0	0	0	0	1.00012209	0	0	0	0	0	0	0	1.00012209	3.00109917	2.00048844	0	0	0	0	0	0	0	0	0	0	0	0	0	0	0	0
ENSDARG00000009978	11.01479701	7.005988269	1.00012209	0	2.00048844	1.00012209	4.001954397	33.13365292	0	1.00012209	0	5.003054244	0	1.00012209	5.003054244	0	0	110.476572	14.02398044	0	0	0	39.18685599	0	0	0	1.00012209	0	0	0	23.06481795	17.03537624	23.06481795	1.00012209	8.007822687	1.00012209	9.009902203	1.00012209	0	86.91567173	0	0	0	0	0	0	21.05401772	0	0
ENSDARG00000009982	1.00012209	0	0	0	0	0	0	0	0	2.00048844	0	0	0	0	0	0	0	0	0	0	0	0	0	0	0	0	0	0	0	0	0	0	0	0	2.00048844	0	0	0	0	2.00048844	0	0	0	0	0	0	0	0	0
ENSDARG00000010002	1.00012209	0	0	0	0	1.00012209	0	1.00012209	0	2.00048844	0	0	0	0	1.00012209	0	0	1.00012209	0	0	0	0	0	0	0	0	0	0	0	0	3.00109917	0	0	0	0	0	0	0	0	3.00109917	0	0	0	0	0	0	0	0	0
ENSDARG00000010008	0	0	0	0	0	0	0	0	0	5.003054244	0	0	0	0	0	0	0	8.007822687	1.00012209	0	0	0	0	0	0	0	0	0	0	0	0	0	0	0	0	0	0	0	0	3.00109917	0	0	0	0	0	0	0	0	0
ENSDARG00000010010	0	0	0	0	0	0	0	0	0	0	0	0	0	0	1.00012209	0	0	0	0	0	0	0	1.00012209	0	0	0	0	0	0	0	1.00012209	0	0	0	0	0	0	0	0	0	0	0	0	0	0	0	0	0	0
ENSDARG00000010018	1.00012209	0	0	0	0	0	0	0	0	2.00048844	0	0	0	0	0	0	0	0	0	0	0	0	0	0	0	0	0	0	0	0	4.001954397	2.00048844	1.00012209	0	1.00012209	0	0	0	0	1.00012209	0	1.00012209	0	0	0	0	0	0	0
ENSDARG00000010021	0	0	0	0	0	0	0	0	0	2.00048844	0	0	0	0	2.00048844	0	0	0	0	0	0	0	0	0	1.00012209	0	0	0	0	0	0	0	0	0	1.00012209	0	1.00012209	0	0	1.00012209	0	0	0	0	0	0	3.00109917	0	0
ENSDARG00000010023	0	0	0	0	0	0	0	0	0	0	0	0	0	0	0	0	0	1.00012209	0	0	0	0	0	0	0	0	0	0	0	1.00012209	2.00048844	0	0	0	0	0	0	0	0	1.00012209	0	0	0	0	0	0	0	0	0
ENSDARG00000010029	0	0	0	0	0	0	0	0	0	0	0	0	0	0	0	0	0	3.00109917	0	0	0	0	0	0	0	0	0	0	0	0	0	0	0	0	0	0	0	0	0	0	0	0	0	0	0	0	0	0	0
ENSDARG00000010032	0	0	0	0	0	0	0	1.00012209	0	0	0	0	0	0	0	0	0	0	1.00012209	0	0	0	2.00048844	0	0	0	0	0	0	0	0	0	0	0	0	0	0	0	0	0	0	0	0	0	0	0	4.001954397	0	0
ENSDARG00000010035	0	0	0	0	0	0	0	0	0	0	0	0	0	0	0	0	0	0	0	0	0	0	0	0	0	0	0	0	0	0	0	0	0	0	0	0	0	0	0	0	0	0	0	0	0	0	0	0	0
ENSDARG00000010047	0	0	0	0	0	0	0	0	0	0	0	0	0	0	0	0	0	0	0	0	0	0	0	0	0	0	0	0	0	0	0	0	0	0	0	0	0	0	0	0	0	0	0	0	0	0	0	0	0
ENSDARG00000010051	0	0	0	0	0	0	0	1.00012209	0	2.00048844	0	0	0	0	0	0	0	0	0	0	0	0	1.00012209	0	1.00012209	0	0	0	0	0	1.00012209	0	0	0	0	0	0	0	0	0	0	0	0	0	0	0	0	0	0
ENSDARG00000010052	1.00012209	0	0	0	0	0	0	2.00048844	0	0	0	0	0	0	0	0	0	0	0	0	0	0	3.00109917	0	1.00012209	0	0	0	0	0	0	0	0	0	0	0	0	0	0	0	0	0	0	0	0	0	0	0	0
ENSDARG00000010059	0	0	0	0	0	0	0	1.00012209	0	0	0	0	0	0	0	0	0	0	0	0	0	0	1.00012209	0	0	0	0	0	0	0	1.00012209	0	4.001954397	0	2.00048844	1.00012209	1.00012209	0	0	0	0	0	0	0	0	0	5.003054244	0	0
ENSDARG00000010070	3.00109917	2.00048844	0	0	0	0	0	1.00012209	0	0	0	0	0	0	2.00048844	0	0	3.00109917	0	0	0	0	4.001954397	0	0	0	0	0	0	0	2.00048844	0	0	0	0	0	0	0	0	0	0	0	0	0	0	0	11.01479701	0	0
ENSDARG00000010073	0	0	0	0	0	0	0	0	0	1.00012209	0	0	0	0	0	0	0	0	0	0	0	0	0	0	0	0	0	0	0	0	0	0	0	0	0	0	0	0	0	0	0	0	0	0	0	0	0	0	0
ENSDARG00000010078	0	0	0	0	0	0	0	0	0	0	0	0	0	0	0	0	0	0	1.00012209	0	0	0	1.00012209	0	0	0	0	0	0	0	0	0	0	0	0	0	0	0	0	0	0	0	0	0	0	0	1.00012209	0	0
ENSDARG00000010083	0	0	0	0	0	0	0	0	0	0	0	0	0	0	0	0	0	0	0	0	0	0	0	0	0	0	0	0	0	0	0	0	0	0	0	0	0	0	0	0	0	0	0	0	0	0	0	0	0
ENSDARG00000010085	0	0	0	0	1.00012209	0	0	0	0	0	0	0	0	0	0	0	0	6.004398828	0	0	0	0	3.00109917	0	0	0	0	0	0	3.00109917	0	0	0	0	1.00012209	0	0	0	0	0	0	0	0	0	0	0	4.001954397	0	0
ENSDARG00000010096	0	0	0	0	0	0	0	1.00012209	0	3.00109917	0	0	1.00012209	0	0	0	0	3.00109917	0	0	0	0	4.001954397	0	0	0	0	0	0	0	0	0	0	0	1.00012209	0	1.00012209	0	0	1.00012209	0	2.00048844	0	0	0	0	4.001954397	0	0
ENSDARG00000010098	0	0	0	0	0	0	0	1.00012209	0	0	0	1.00012209	0	0	0	0	0	0	1.00012209	0	0	0	0	0	0	0	0	0	0	0	1.00012209	0	1.00012209	0	1.00012209	0	0	0	0	0	0	0	0	0	0	0	4.001954397	0	0
ENSDARG00000010108	4.001954397	0	0	0	0	0	0	0	0	3.00109917	0	0	0	0	0	0	0	0	1.00012209	0	0	0	1.00012209	0	0	0	0	0	0	0	0	0	0	0	0	1.00012209	1.00012209	0	0	0	0	0	0	0	0	0	0	0	0
ENSDARG00000010113	2.00048844	0	0	0	0	1.00012209	1.00012209	0	0	16.03133162	0	2.00048844	0	0	1.00012209	0	0	2.00048844	2.00048844	0	0	0	0	0	2.00048844	0	0	0	0	0	0	0	0	0	0	0	1.00012209	0	0	2.00048844	0	1.00012209	0	0	0	0	1.00012209	0	0
ENSDARG00000010132	0	0	0	0	0	0	0	0	0	2.00048844	0	0	0	0	0	0	0	0	0	0	0	0	0	0	1.00012209	0	0	0	0	0	0	0	0	0	0	0	0	0	0	0	0	1.00012209	0	0	0	0	0	0	0
ENSDARG00000010137	0	0	0	0	0	0	0	0	0	2.00048844	0	0	0	0	1.00012209	0	0	1.00012209	0	0	0	0	0	0	0	0	0	0	0	0	0	0	0	0	0	0	0	0	0	0	0	0	0	0	0	0	1.00012209	0	0
ENSDARG00000010144	0	0	0	0	0	0	0	0	0	0	0	0	0	0	0	1.00012209	0	0	0	0	0	0	0	0	0	0	0	0	0	0	0	0	0	0	0	0	0	0	0	0	0	0	0	0	0	0	0	0	0
ENSDARG00000010145	0	0	0	0	0	0	0	0	0	0	0	0	0	0	0	0	0	0	0	0	0	0	0	0	0	0	0	0	0	0	0	0	0	0	0	0	0	0	0	0	0	0	0	0	0	0	0	0	0
ENSDARG00000010149	1.00012209	1.00012209	3.00109917	1.00012209	4.001954397	4.001954397	2.00048844	10.01222694	1.00012209	121.7929173	0	3.00109917	2.00048844	2.00048844	4.001954397	0	1.00012209	33.13365292	3.00109917	0	0	6.004398828	6.004398828	0	9.009902203	1.00012209	0	0	0	3.00109917	5.003054244	4.001954397	1.00012209	5.003054244	3.00109917	1.00012209	3.00109917	0	0	6.004398828	1.00012209	5.003054244	0	1.00012209	0	1.00012209	17.03537624	1.00012209	0
ENSDARG00000010154	0	0	0	0	0	0	0	0	0	0	0	0	0	0	0	0	0	1.00012209	0	0	0	0	0	0	0	0	0	0	0	0	0	0	0	0	0	0	0	0	0	0	0	0	0	0	0	0	0	0	0
ENSDARG00000010155	0	0	0	0	0	0	1.00012209	2.00048844	0	0	0	0	0	0	1.00012209	0	0	0	0	0	0	0	2.00048844	0	0	0	0	0	0	0	1.00012209	3.00109917	0	0	0	0	0	0	0	1.00012209	0	0	0	0	0	0	3.00109917	0	0
ENSDARG00000010158	0	0	0	0	0	0	0	0	0	0	0	0	0	0	0	0	0	0	0	0	0	0	0	0	0	0	0	0	0	0	0	0	0	0	0	0	0	0	0	0	0	0	0	0	0	0	0	0	0
ENSDARG00000010160	12.01761253	5.003054244	2.00048844	0	0	0	1.00012209	23.06481795	0	24.07058837	0	7.005988269	0	0	3.00109917	0	0	51.32016528	10.01222694	0	0	2.00048844	49.29544947	0	2.00048844	0	0	0	0	0	15.02753306	2.00048844	11.01479701	1.00012209	10.01222694	2.00048844	9.009902203	0	2.00048844	17.03537624	0	0	0	0	0	0	53.34588243	0	0
ENSDARG00000010169	0	0	0	0	0	0	0	0	0	0	0	1.00012209	0	0	0	0	0	0	0	0	0	0	4.001954397	0	0	0	0	0	0	0	0	1.00012209	0	0	0	0	0	0	0	0	0	0	0	0	0	0	0	0	0
ENSDARG00000010181	0	0	0	0	0	0	1.00012209	0	0	0	0	0	0	0	1.00012209	0	0	1.00012209	2.00048844	0	0	0	9.009902203	0	0	0	0	0	0	0	3.00109917	3.00109917	0	0	5.003054244	0	0	0	0	0	0	0	0	0	0	0	11.01479701	0	0
ENSDARG00000010183	0	0	0	0	0	0	0	0	0	0	0	0	0	0	0	0	0	0	0	0	0	0	0	0	0	0	0	0	0	0	0	0	0	0	0	0	1.00012209	0	0	0	0	0	0	0	0	0	0	0	0
ENSDARG00000010186	0	0	0	0	0	0	0	0	0	1.00012209	0	0	0	0	0	0	0	0	0	0	0	0	0	0	0	0	0	0	0	0	0	0	0	0	0	0	0	0	0	0	0	0	0	0	0	0	0	0	0
ENSDARG00000010191	2.00048844	0	0	0	0	0	0	7.005988269	0	0	0	0	0	0	0	0	0	2.00048844	0	0	0	0	0	0	0	0	0	0	0	0	0	0	0	0	0	0	0	0	0	1.00012209	0	0	0	0	0	0	0	0	0
ENSDARG00000010194	2.00048844	0	0	0	0	0	0	3.00109917	0	5.003054244	0	0	0	0	0	0	0	1.00012209	0	0	0	2.00048844	0	0	2.00048844	0	0	0	0	0	1.00012209	0	0	0	2.00048844	0	0	0	0	1.00012209	0	0	0	0	0	0	2.00048844	0	0
ENSDARG00000010207	0	0	0	0	0	0	0	0	0	1.00012209	0	0	0	0	0	0	0	3.00109917	0	0	0	0	0	0	1.00012209	0	0	0	0	0	0	0	0	0	0	0	0	0	1.00012209	0	0	0	0	0	0	0	1.00012209	0	0
ENSDARG00000010231	0	0	0	0	0	0	0	0	0	0	0	0	0	0	0	0	0	0	0	0	0	0	0	0	0	0	0	0	0	0	0	0	0	0	0	0	0	0	0	0	0	0	0	0	0	0	0	0	0
ENSDARG00000010244	1.00012209	1.00012209	0	0	0	0	0	5.003054244	0	7.005988269	0	0	0	0	1.00012209	0	0	10.01222694	2.00048844	0	0	0	14.02398044	0	0	0	0	0	0	0	0	1.00012209	0	0	0	0	1.00012209	0	0	8.007822687	0	0	0	0	0	0	5.003054244	0	0
ENSDARG00000010246	0	0	0	0	0	0	0	0	0	5.003054244	0	1.00012209	0	0	0	0	0	10.01222694	0	0	0	0	3.00109917	0	0	0	0	0	0	0	0	0	0	0	0	0	0	0	0	0	0	0	0	0	0	0	4.001954397	0	0
ENSDARG00000010248	0	0	0	0	0	0	0	0	0	0	0	0	0	0	0	0	0	0	0	0	0	0	0	0	0	0	0	0	0	0	1.00012209	0	0	0	0	0	0	0	0	0	0	0	0	0	0	0	0	0	0
ENSDARG00000010250	0	0	0	0	0	0	0	0	0	0	0	0	0	0	0	0	0	1.00012209	0	0	0	1.00012209	0	0	0	0	0	0	0	0	0	0	0	0	0	0	0	0	0	0	0	0	0	0	0	0	0	0	0
ENSDARG00000010252	1.00012209	0	0	0	0	0	0	1.00012209	0	0	0	1.00012209	0	0	0	0	0	0	0	0	0	0	0	0	0	0	0	0	0	0	0	0	0	0	0	0	0	0	0	0	0	0	0	0	0	0	0	0	0
ENSDARG00000010255	1.00012209	0	0	0	0	0	0	1.00012209	0	0	0	0	0	0	0	0	0	0	0	0	0	0	1.00012209	0	0	0	0	0	0	0	0	0	0	0	0	0	0	0	0	0	0	0	0	0	0	0	3.00109917	0	0
ENSDARG00000010266	0	0	0	0	0	0	0	0	0	0	0	0	0	0	0	0	0	0	0	0	0	0	0	0	0	0	0	0	0	0	0	0	0	0	0	0	0	0	0	0	0	0	0	0	0	0	0	0	0
ENSDARG00000010276	0	0	0	1.00012209	0	0	1.00012209	0	0	0	0	0	0	0	0	0	0	0	0	0	0	0	22.05929444	0	0	0	0	0	0	0	0	0	0	0	0	0	0	0	0	0	0	0	0	0	0	0	30.11040269	0	0
ENSDARG00000010279	1.00012209	0	0	0	0	0	0	2.00048844	0	0	0	1.00012209	0	0	0	0	0	1.00012209	1.00012209	0	0	0	0	0	0	0	0	0	0	1.00012209	0	0	0	0	2.00048844	0	0	0	0	1.00012209	0	0	0	0	0	0	5.003054244	0	0
ENSDARG00000010280	0	0	0	0	0	0	1.00012209	1.00012209	0	0	0	0	0	0	2.00048844	0	0	1.00012209	0	0	0	0	2.00048844	0	0	0	0	0	0	0	0	0	0	0	1.00012209	0	0	0	0	0	0	0	0	0	0	0	1.00012209	0	0
ENSDARG00000010281	0	0	0	0	0	0	0	0	0	0	0	0	0	0	0	0	0	0	0	0	0	0	0	0	1.00012209	0	0	0	0	0	0	1.00012209	0	0	0	0	1.00012209	0	0	0	0	0	0	0	0	0	0	0	0
ENSDARG00000010290	1.00012209	0	0	0	0	0	0	3.00109917	0	0	0	0	0	0	0	0	0	0	0	0	0	0	1.00012209	0	0	0	0	0	0	0	0	2.00048844	1.00012209	0	0	0	0	0	0	0	0	0	0	0	0	0	4.001954397	0	0
ENSDARG00000010294	0	0	0	0	0	0	0	0	0	0	0	0	0	0	0	0	0	1.00012209	0	0	0	0	0	0	0	0	0	0	0	0	0	0	0	0	0	0	0	0	0	0	0	0	0	0	0	0	0	0	0
ENSDARG00000010297	0	0	0	0	0	0	0	0	0	1.00012209	0	0	0	0	0	0	0	1.00012209	0	0	0	0	0	0	0	0	0	0	0	0	0	0	0	0	0	0	0	0	0	0	0	0	0	0	0	0	0	0	0
ENSDARG00000010300	0	0	0	0	0	0	0	0	0	0	0	0	0	0	0	0	0	0	0	0	0	0	0	0	0	0	0	0	0	0	0	0	0	0	0	0	0	0	0	0	0	0	0	0	0	0	0	0	0
ENSDARG00000010301	0	0	0	0	0	0	0	2.00048844	0	1.00012209	0	1.00012209	0	0	0	0	0	0	0	0	0	0	2.00048844	0	1.00012209	0	0	0	0	0	0	0	0	0	0	0	1.00012209	0	0	0	0	0	0	0	0	0	1.00012209	0	0
ENSDARG00000010316	0	0	0	0	0	0	1.00012209	5.003054244	0	0	0	0	0	0	0	0	0	5.003054244	0	0	0	0	1.00012209	0	0	0	0	0	0	0	0	0	0	0	0	0	0	0	0	0	0	0	0	0	0	0	3.00109917	0	0
ENSDARG00000010317	3.00109917	0	0	0	0	0	0	0	0	0	0	0	0	0	0	0	0	0	0	0	0	0	0	0	0	0	0	0	0	0	0	0	0	0	0	0	0	0	0	0	0	0	0	0	0	0	0	0	0
ENSDARG00000010318	0	0	0	0	0	0	0	0	0	0	0	0	0	0	1.00012209	0	0	1.00012209	1.00012209	0	0	0	0	0	0	0	0	0	0	0	0	0	0	0	2.00048844	0	0	0	0	0	0	0	0	0	0	0	2.00048844	0	0
ENSDARG00000010331	0	0	0	0	0	0	0	0	0	0	0	0	0	0	0	0	0	0	0	0	0	0	0	0	0	0	0	0	0	0	0	0	0	0	0	0	0	0	0	0	0	0	0	0	0	0	0	0	0
ENSDARG00000010376	0	0	0	0	0	0	0	0	0	0	0	0	0	0	0	0	0	0	0	0	0	0	0	0	0	0	0	0	0	0	0	0	0	0	0	0	0	0	0	0	0	0	0	0	0	0	0	0	0
ENSDARG00000010378	0	0	0	0	0	0	0	0	0	0	0	0	0	0	0	0	0	0	0	0	0	0	0	0	0	0	0	0	0	0	0	0	0	0	0	0	0	0	0	0	0	0	0	0	0	0	0	0	0
ENSDARG00000010381	1.00012209	0	0	0	0	0	0	0	0	0	0	0	0	0	0	0	0	1.00012209	0	0	0	0	0	0	0	0	0	0	0	0	0	1.00012209	0	0	1.00012209	0	1.00012209	0	0	0	0	0	0	0	0	0	2.00048844	0	0
ENSDARG00000010382	0	0	0	0	0	0	0	0	0	0	0	0	0	0	0	0	0	1.00012209	0	0	0	0	1.00012209	0	0	0	0	0	0	0	0	0	0	0	0	0	0	0	0	0	0	0	0	0	0	0	0	0	0
ENSDARG00000010384	0	0	0	0	0	0	0	0	0	0	0	0	0	0	0	0	0	0	0	0	0	0	0	0	0	0	0	0	0	0	0	0	0	0	0	0	0	0	0	0	0	0	0	0	0	0	0	0	0
ENSDARG00000010400	0	0	0	0	0	0	0	0	0	3.00109917	0	0	0	0	0	0	0	0	0	0	0	0	0	0	5.003054244	0	0	0	0	0	0	0	0	0	0	0	0	0	0	0	0	0	0	0	0	0	0	0	0
ENSDARG00000010411	0	0	0	0	0	0	0	5.003054244	0	7.005988269	0	0	0	0	0	0	0	1.00012209	0	0	0	2.00048844	2.00048844	0	0	0	0	0	0	0	0	0	0	0	0	0	0	0	0	1.00012209	0	0	0	0	0	0	1.00012209	0	0
ENSDARG00000010415	0	0	0	0	0	0	0	0	0	0	0	0	0	0	0	0	0	2.00048844	0	0	0	0	0	0	0	0	0	0	0	0	0	0	0	0	0	0	0	0	0	0	0	0	0	0	0	0	0	0	0
ENSDARG00000010425	0	0	0	0	0	0	0	0	0	5.003054244	0	0	0	0	0	0	0	3.00109917	0	0	0	0	0	0	0	0	0	0	0	0	0	1.00012209	0	0	1.00012209	0	3.00109917	0	0	0	0	1.00012209	0	0	0	0	1.00012209	0	0
ENSDARG00000010432	0	1.00012209	0	0	0	0	0	0	0	0	0	0	0	0	0	0	0	1.00012209	0	0	0	0	0	0	0	0	0	0	0	0	0	0	0	0	0	0	0	0	0	0	0	0	0	0	0	0	1.00012209	0	0
ENSDARG00000010433	0	0	0	0	0	0	0	0	0	0	0	0	0	0	0	0	0	0	0	0	0	0	0	0	0	0	0	0	0	0	0	0	0	0	0	0	0	0	0	0	0	0	0	0	0	0	0	0	0
ENSDARG00000010434	0	0	0	0	0	0	0	0	0	0	0	0	0	0	0	0	0	10.01222694	0	0	0	0	0	0	0	0	0	0	0	0	0	0	4.001954397	0	0	0	0	0	0	0	0	0	0	0	0	0	0	0	0
ENSDARG00000010437	0	0	0	0	0	0	0	0	0	19.04420413	0	0	0	0	0	0	0	3.00109917	0	0	0	0	0	0	0	0	0	0	0	0	0	0	0	0	0	0	0	0	0	0	0	0	0	0	0	0	0	0	0
ENSDARG00000010442	2.00048844	0	0	0	0	0	0	1.00012209	0	0	0	0	0	0	0	0	0	0	0	0	0	0	0	0	0	0	0	0	0	0	0	0	0	0	0	0	0	0	0	0	0	0	0	0	0	0	0	0	0
ENSDARG00000010445	0	0	0	0	0	0	0	1.00012209	0	0	0	0	0	0	0	0	0	0	0	0	0	0	0	0	0	0	0	0	0	0	0	0	0	0	0	0	0	0	0	0	0	0	0	0	0	0	0	0	0
ENSDARG00000010462	0	0	0	0	0	0	0	0	0	0	0	0	0	0	0	0	0	0	0	0	0	0	0	0	0	0	0	0	0	0	0	0	0	0	0	0	0	0	0	0	0	0	0	0	0	0	0	0	0
ENSDARG00000010478	0	0	0	0	0	0	0	1.00012209	0	5.003054244	0	0	0	0	0	0	0	0	0	0	0	1.00012209	0	0	0	0	0	0	0	2.00048844	0	0	0	0	0	1.00012209	0	0	0	0	0	0	0	0	0	0	3.00109917	0	0
ENSDARG00000010481	0	1.00012209	1.00012209	0	0	0	0	3.00109917	0	2.00048844	0	0	0	0	3.00109917	0	0	10.01222694	1.00012209	1.00012209	0	0	3.00109917	0	0	0	0	0	0	0	0	2.00048844	0	1.00012209	0	0	1.00012209	0	0	1.00012209	0	0	0	0	0	0	10.01222694	0	0
ENSDARG00000010487	0	0	0	0	0	0	0	0	0	0	0	0	0	0	0	0	0	2.00048844	0	0	0	0	0	0	1.00012209	0	0	0	0	0	0	0	0	0	0	0	0	0	0	0	0	0	0	0	0	0	0	0	0
ENSDARG00000010515	0	0	0	0	0	0	0	0	0	0	0	0	0	0	0	0	0	0	0	0	0	0	0	0	0	0	0	0	0	0	0	0	0	0	0	0	0	0	0	0	0	0	0	0	0	0	0	0	0
ENSDARG00000010516	20.04898766	3.00109917	0	1.00012209	0	2.00048844	5.003054244	31.11790484	0	53.34588243	0	9.009902203	2.00048844	0	4.001954397	0	0	68.57077916	18.03966704	0	0	1.00012209	40.19659345	0	5.003054244	0	1.00012209	0	0	1.00012209	21.05401772	9.009902203	16.03133162	0	13.02067364	1.00012209	12.01761253	0	0	23.06481795	0	0	1.00012209	0	0	0	35.15039348	0	0
ENSDARG00000010519	0	0	0	0	0	0	0	0	0	0	0	0	0	0	2.00048844	1.00012209	0	0	1.00012209	0	0	0	1.00012209	0	0	0	0	0	0	0	0	0	0	0	0	0	0	0	0	0	0	0	0	0	0	0	2.00048844	0	0
ENSDARG00000010524	0	0	0	0	0	0	0	1.00012209	0	0	0	0	0	0	0	0	0	0	0	0	0	0	2.00048844	0	0	0	0	0	0	0	0	0	0	0	0	0	0	0	0	0	0	0	0	0	0	0	0	0	0
ENSDARG00000010531	0	0	0	0	0	0	0	0	0	0	0	0	0	0	0	0	0	3.00109917	1.00012209	0	0	0	0	0	0	0	0	0	0	0	0	0	0	0	1.00012209	0	0	0	0	0	0	0	0	0	0	0	0	0	0
ENSDARG00000010541	1.00012209	0	0	0	0	0	0	3.00109917	0	0	0	0	0	0	1.00012209	0	0	0	0	0	0	0	0	0	0	0	0	0	0	0	0	0	0	0	0	0	1.00012209	0	0	0	0	0	0	0	0	0	0	0	0
ENSDARG00000010553	0	0	0	0	0	0	0	0	0	0	0	0	0	0	1.00012209	0	0	1.00012209	0	0	0	0	0	0	0	0	0	0	0	0	0	0	0	1.00012209	0	0	0	0	0	0	0	0	0	0	0	0	3.00109917	0	0
ENSDARG00000010556	0	0	0	0	0	0	0	1.00012209	0	0	0	0	0	0	0	0	0	0	0	0	0	0	0	0	0	0	0	0	0	0	0	0	0	0	0	0	0	0	0	0	0	0	0	0	0	0	0	0	0
ENSDARG00000010563	0	0	0	0	0	0	0	0	0	0	0	0	0	0	1.00012209	0	0	0	0	0	0	0	0	0	0	0	0	0	0	0	0	0	0	0	0	0	0	0	0	2.00048844	0	0	0	0	0	0	1.00012209	0	0
ENSDARG00000010565	0	0	0	0	0	0	0	0	0	0	0	0	0	0	0	0	0	0	0	0	0	0	0	0	0	0	0	0	0	0	0	0	0	0	0	0	0	0	0	0	0	1.00012209	0	0	0	0	0	0	0
ENSDARG00000010571	0	0	0	0	0	0	0	0	0	0	0	0	0	0	0	0	0	0	0	0	0	0	0	0	0	0	0	0	0	0	0	0	0	0	0	0	0	0	0	0	0	0	0	0	0	0	0	0	0
ENSDARG00000010572	2.00048844	1.00012209	0	0	0	0	0	0	0	7.005988269	0	1.00012209	0	0	1.00012209	0	0	1.00012209	3.00109917	0	0	1.00012209	4.001954397	0	0	0	0	0	0	0	0	1.00012209	2.00048844	0	0	0	0	0	0	0	0	0	0	0	0	0	1.00012209	0	0
ENSDARG00000010583	0	0	0	0	0	0	0	0	0	0	0	0	0	0	0	0	0	2.00048844	0	0	0	0	1.00012209	0	0	0	0	0	0	0	0	0	0	0	0	1.00012209	0	0	0	0	0	0	0	0	0	0	1.00012209	0	0
ENSDARG00000010596	0	0	0	0	0	0	0	1.00012209	0	1.00012209	0	0	0	0	1.00012209	0	0	3.00109917	0	0	0	0	1.00012209	0	0	0	0	0	0	0	0	0	0	0	0	0	0	0	0	0	0	0	0	0	0	0	2.00048844	0	0
ENSDARG00000010601	0	0	0	0	0	0	0	0	0	0	0	0	0	0	0	0	0	0	0	0	0	0	0	0	0	0	0	0	0	0	0	0	0	0	0	0	0	0	0	0	0	0	0	0	0	0	1.00012209	0	0
ENSDARG00000010602	0	0	0	0	0	0	0	0	0	0	0	0	0	0	0	0	0	0	0	0	0	0	0	0	0	0	0	0	0	0	0	0	0	0	0	0	0	0	0	0	0	0	0	0	0	0	0	0	0
ENSDARG00000010603	0	0	0	0	0	0	0	0	0	1.00012209	0	0	0	0	0	0	0	2.00048844	0	0	0	0	0	0	0	0	0	0	0	0	0	0	1.00012209	2.00048844	0	0	0	0	0	0	0	2.00048844	0	0	0	0	0	0	0
ENSDARG00000010619	0	0	0	0	0	0	0	0	0	0	0	0	0	0	0	0	0	0	0	0	0	0	0	0	0	0	0	0	0	0	0	0	0	0	0	0	0	1.00012209	0	0	0	0	0	0	0	0	0	0	0
ENSDARG00000010625	9.009902203	0	2.00048844	2.00048844	0	0	4.001954397	23.06481795	0	5.003054244	0	17.03537624	2.00048844	1.00012209	10.01222694	0	1.00012209	4.001954397	34.14189908	0	0	0	33.13365292	0	0	0	0	0	0	1.00012209	52.33289863	39.18685599	9.009902203	0	16.03133162	0	15.02753306	0	0	0	0	0	0	0	0	1.00012209	100.2160456	0	0
ENSDARG00000010640	0	0	0	0	0	0	0	0	0	0	0	0	0	0	0	0	0	1.00012209	0	0	0	0	0	0	0	0	0	0	0	0	0	0	0	0	0	0	0	0	0	0	0	0	0	0	0	0	0	0	0
ENSDARG00000010641	0	1.00012209	0	0	0	0	0	0	0	0	0	0	0	0	0	0	0	10.01222694	1.00012209	0	0	0	9.009902203	0	0	0	0	0	0	0	2.00048844	4.001954397	0	0	0	0	0	0	0	4.001954397	0	0	0	1.00012209	0	0	5.003054244	0	0
ENSDARG00000010655	0	0	0	0	0	0	1.00012209	0	0	1.00012209	0	0	0	0	0	0	0	0	1.00012209	0	0	0	1.00012209	0	0	0	0	0	0	0	1.00012209	1.00012209	1.00012209	0	1.00012209	0	0	0	0	0	0	0	0	0	0	0	0	0	0
ENSDARG00000010657	0	0	0	0	0	0	0	1.00012209	0	0	0	0	0	0	0	0	0	0	0	0	0	0	0	0	0	0	0	0	0	0	1.00012209	0	1.00012209	0	0	0	0	0	0	0	0	0	0	0	0	0	1.00012209	0	0
ENSDARG00000010658	0	0	0	0	0	0	0	6.004398828	0	0	0	0	0	0	0	1.00012209	0	0	0	0	0	0	1.00012209	0	0	0	0	0	0	0	0	0	0	0	0	0	0	0	0	0	0	0	0	0	0	0	2.00048844	0	0
ENSDARG00000010673	0	0	0	0	0	0	0	0	0	0	0	0	0	0	0	0	0	0	0	0	0	0	0	0	0	0	0	0	0	0	0	0	0	0	0	0	0	0	0	0	0	0	0	0	0	0	0	0	0
ENSDARG00000010681	0	0	0	0	0	0	0	2.00048844	0	0	0	0	0	0	0	0	0	0	0	0	0	0	0	0	0	0	0	0	0	0	0	0	0	0	0	0	0	0	0	0	0	0	0	0	0	0	0	0	0
ENSDARG00000010700	0	0	0	0	0	0	0	0	0	0	0	0	0	0	0	0	0	1.00012209	0	0	0	0	1.00012209	0	0	0	0	0	0	0	0	0	0	0	0	0	0	0	0	1.00012209	0	0	0	0	0	0	2.00048844	0	0
ENSDARG00000010701	0	0	0	0	0	0	0	0	0	0	0	0	0	0	0	0	0	1.00012209	0	0	0	0	0	0	0	0	0	0	0	0	0	0	0	0	0	0	0	0	0	0	0	0	0	0	0	0	0	0	0
ENSDARG00000010710	0	0	0	0	0	0	0	0	0	0	0	0	0	0	0	0	0	0	0	0	0	0	0	0	0	0	0	0	0	0	0	0	0	0	0	0	0	0	0	0	0	0	0	0	0	0	0	0	0
ENSDARG00000010717	0	0	0	0	0	0	0	0	1.00012209	9.009902203	0	0	0	0	0	0	0	1.00012209	0	0	0	0	0	0	1.00012209	0	0	0	0	0	0	0	0	0	0	0	0	0	0	0	0	0	0	0	0	0	2.00048844	0	0
ENSDARG00000010721	0	0	1.00012209	0	0	0	0	1.00012209	0	0	0	0	0	0	0	0	0	1.00012209	0	0	0	0	1.00012209	0	0	0	0	0	0	0	3.00109917	5.003054244	5.003054244	0	6.004398828	1.00012209	2.00048844	0	0	0	0	0	0	0	0	0	7.005988269	0	0
ENSDARG00000010728	0	0	0	0	0	0	0	0	0	0	0	0	0	0	0	0	0	0	0	0	0	0	0	0	0	0	0	0	0	0	0	0	0	0	0	0	0	0	0	0	0	0	0	0	0	0	0	0	0
ENSDARG00000010729	0	0	0	0	0	0	0	1.00012209	0	1.00012209	0	5.003054244	0	0	0	0	0	0	0	0	0	0	0	0	0	0	0	0	0	0	0	8.007822687	0	0	0	0	0	0	0	0	0	0	0	0	0	0	3.00109917	0	0
ENSDARG00000010732	0	0	0	0	0	0	0	0	0	1.00012209	0	0	0	0	0	0	0	0	0	0	0	0	0	0	1.00012209	0	0	0	0	0	0	0	0	0	0	0	0	0	0	0	0	0	0	0	0	0	0	0	0
ENSDARG00000010738	0	0	0	0	0	0	0	0	0	0	0	0	0	0	0	0	0	2.00048844	0	0	0	0	0	0	0	0	0	0	0	0	0	0	0	0	0	0	0	0	0	1.00012209	0	0	0	0	0	0	0	0	0
ENSDARG00000010745	0	1.00012209	0	0	0	0	0	1.00012209	0	1.00012209	0	0	0	0	0	0	0	4.001954397	1.00012209	0	0	0	0	0	0	0	0	0	0	0	0	0	2.00048844	0	0	0	0	0	0	1.00012209	0	0	0	0	0	0	1.00012209	0	0
ENSDARG00000010752	1.00012209	0	0	0	0	0	0	0	0	0	0	1.00012209	0	0	0	0	0	0	0	0	0	0	5.003054244	0	0	0	0	0	0	0	1.00012209	2.00048844	2.00048844	0	0	0	1.00012209	0	0	0	0	0	0	0	0	0	8.007822687	0	0
ENSDARG00000010756	0	0	0	0	0	0	0	1.00012209	0	0	0	3.00109917	0	0	0	0	0	0	0	0	0	0	0	0	0	0	0	0	0	0	0	0	0	0	0	0	0	0	0	0	0	0	0	0	0	0	0	0	0
ENSDARG00000010758	0	0	0	0	0	0	0	0	0	0	0	0	0	0	0	0	0	0	0	0	0	0	0	0	0	0	0	0	0	0	0	0	0	0	0	0	0	0	0	0	0	0	0	0	0	0	0	0	0
ENSDARG00000010764	0	0	0	0	0	0	0	0	0	0	0	0	0	0	0	0	0	0	0	0	0	0	0	0	0	0	0	0	0	0	0	0	0	0	0	0	0	0	0	0	0	0	0	0	0	0	0	0	0
ENSDARG00000010767	0	0	0	0	0	0	0	0	0	3.00109917	0	0	0	0	0	0	0	1.00012209	0	0	0	0	0	0	0	0	0	0	0	0	0	1.00012209	0	0	0	0	0	0	0	0	0	0	0	0	0	0	1.00012209	0	0
ENSDARG00000010771	0	0	0	0	0	0	0	0	0	0	0	0	0	0	0	0	0	5.003054244	0	0	0	0	2.00048844	0	0	0	0	0	0	0	0	0	0	0	0	1.00012209	0	0	0	2.00048844	0	0	0	0	0	0	1.00012209	0	0
ENSDARG00000010773	0	1.00012209	0	0	0	0	0	0	0	4.001954397	0	0	0	0	0	0	0	0	0	0	0	1.00012209	0	0	0	0	0	0	0	0	0	0	0	0	0	0	0	0	0	1.00012209	0	0	0	0	0	0	0	0	0
ENSDARG00000010779	0	0	0	0	0	0	0	0	0	0	0	0	0	0	0	0	0	1.00012209	0	0	0	0	0	0	0	0	0	0	0	0	0	0	0	0	0	0	1.00012209	0	0	0	0	0	0	0	0	0	0	0	0
ENSDARG00000010783	0	0	0	0	0	0	0	0	0	0	0	0	0	0	0	0	0	0	0	0	0	0	0	0	0	0	0	0	0	0	0	0	0	0	0	0	0	0	0	0	0	0	0	0	0	0	0	0	0
ENSDARG00000010784	0	0	0	0	0	0	0	0	0	8.007822687	0	0	0	0	0	0	0	1.00012209	0	0	0	0	0	1.00012209	3.00109917	0	0	0	0	0	0	1.00012209	0	0	0	0	0	0	0	0	0	0	0	0	0	0	0	0	0
ENSDARG00000010785	0	0	0	0	0	0	0	0	0	0	0	0	0	0	0	0	0	0	0	0	0	0	0	0	0	0	0	0	0	0	0	0	0	0	0	0	0	0	0	0	0	0	0	0	0	0	0	0	0
ENSDARG00000010789	0	0	0	0	0	0	0	0	0	0	0	0	0	0	0	0	0	1.00012209	0	0	0	0	0	0	0	0	0	0	0	0	0	0	0	0	0	0	0	0	0	1.00012209	0	0	0	0	0	0	0	0	0
ENSDARG00000010792	5.003054244	0	0	0	1.00012209	0	0	1.00012209	0	0	0	0	0	0	0	0	0	0	0	0	0	0	0	0	0	0	0	0	0	0	0	0	0	0	0	0	0	0	0	0	0	0	0	0	0	0	0	0	0
ENSDARG00000010793	0	1.00012209	0	0	0	0	0	0	0	0	0	0	0	0	0	0	0	0	0	0	0	0	0	0	0	0	0	0	0	0	0	0	1.00012209	1.00012209	0	0	0	0	0	0	0	0	0	0	0	0	0	0	0
ENSDARG00000010794	1.00012209	0	0	0	0	0	0	0	0	3.00109917	0	0	0	0	0	0	0	0	0	0	0	0	0	0	0	0	0	0	0	0	0	0	0	0	0	0	0	0	0	0	0	0	0	0	0	0	0	0	0
ENSDARG00000010823	0	0	0	0	0	0	0	0	0	1.00012209	0	0	0	0	0	0	0	0	0	0	0	0	0	0	0	0	0	0	0	0	0	1.00012209	0	0	0	0	0	0	0	0	0	0	0	0	0	0	0	0	0
ENSDARG00000010831	0	0	0	0	0	0	0	0	0	1.00012209	0	0	0	0	0	0	0	0	0	0	0	0	0	0	0	0	0	0	0	0	0	0	1.00012209	0	0	0	1.00012209	0	0	0	0	0	0	0	0	0	0	0	0
ENSDARG00000010844	0	0	0	0	0	0	0	0	3.00109917	2.00048844	0	0	0	0	0	0	0	3.00109917	0	0	0	0	1.00012209	0	0	0	0	0	0	0	0	0	0	0	1.00012209	0	0	0	0	0	0	0	0	0	0	0	2.00048844	0	0
ENSDARG00000010853	0	0	0	0	0	0	0	2.00048844	0	0	0	0	0	0	1.00012209	0	0	0	1.00012209	0	0	0	1.00012209	0	0	0	0	0	0	0	0	0	0	0	0	0	0	0	0	0	0	0	0	0	0	0	4.001954397	0	0
ENSDARG00000010873	0	0	0	0	0	0	0	0	0	0	0	0	0	0	0	0	0	1.00012209	0	0	0	0	0	0	0	0	0	0	0	0	0	0	1.00012209	0	0	0	0	0	0	0	0	0	0	0	0	0	0	0	0
ENSDARG00000010878	0	0	0	0	0	0	0	0	0	1.00012209	0	0	0	0	0	0	0	0	0	0	0	0	0	0	0	0	0	0	0	0	0	0	0	0	0	0	0	0	0	0	0	0	0	0	0	0	0	0	0
ENSDARG00000010905	0	0	0	0	0	0	0	0	0	0	0	0	0	0	0	0	0	0	0	0	0	0	1.00012209	0	0	0	0	0	0	0	0	0	0	0	0	0	0	0	0	0	0	0	0	0	0	0	0	0	0
ENSDARG00000010906	0	0	0	0	0	0	0	0	0	0	0	0	0	0	1.00012209	0	0	0	0	0	0	0	0	0	0	0	0	0	0	0	0	0	0	0	0	0	1.00012209	0	0	0	0	0	0	0	0	0	0	0	0
ENSDARG00000010918	0	0	0	0	0	0	0	0	0	0	0	0	0	0	0	0	0	0	0	0	0	0	0	0	0	0	0	0	0	0	0	0	0	0	0	0	0	0	0	0	0	0	0	0	0	0	0	0	0
ENSDARG00000010925	0	0	0	0	0	0	0	0	0	0	0	0	0	0	0	0	0	1.00012209	0	0	0	0	0	0	0	0	0	0	0	0	0	0	0	0	0	0	0	0	0	0	0	0	0	0	0	0	0	0	0
ENSDARG00000010936	0	0	0	0	0	0	0	0	0	0	0	0	0	0	0	0	0	0	0	0	0	0	0	0	1.00012209	0	0	0	0	0	0	0	0	0	0	0	0	0	0	0	0	2.00048844	0	0	0	0	0	0	0
ENSDARG00000010940	0	0	0	0	0	0	0	0	0	0	0	0	0	0	0	0	0	0	0	0	0	0	0	0	0	0	0	0	0	0	0	0	0	0	1.00012209	0	0	0	0	0	0	0	0	0	0	0	0	0	0
ENSDARG00000010941	0	0	0	0	0	0	0	0	0	0	0	0	0	0	0	0	0	3.00109917	0	0	0	0	2.00048844	0	0	0	0	0	0	0	1.00012209	0	0	0	0	0	1.00012209	0	0	0	0	0	0	0	0	0	1.00012209	0	0
ENSDARG00000010946	0	0	0	0	0	0	0	0	0	0	0	0	0	0	0	0	0	5.003054244	0	0	0	0	0	0	0	0	0	0	0	0	0	0	0	0	0	0	0	0	0	0	0	0	0	0	0	0	0	0	0
ENSDARG00000010948	0	0	0	0	0	0	0	0	0	0	0	0	0	0	0	0	0	0	0	0	0	0	0	0	0	0	0	0	0	0	0	0	0	0	0	0	0	0	0	0	0	0	0	0	0	0	0	0	0
ENSDARG00000010953	0	0	0	0	0	0	0	1.00012209	0	0	0	0	0	0	0	0	0	0	1.00012209	0	0	1.00012209	0	0	0	0	0	0	0	0	0	1.00012209	0	0	0	0	0	0	0	3.00109917	0	1.00012209	0	0	0	0	0	0	0
ENSDARG00000010956	0	0	0	0	0	0	0	1.00012209	0	0	0	0	0	0	0	0	0	0	1.00012209	0	0	0	0	0	1.00012209	0	0	0	0	0	0	0	1.00012209	0	1.00012209	0	0	0	0	0	0	0	0	0	0	0	0	0	0
ENSDARG00000010957	0	0	0	0	0	0	0	0	0	1.00012209	0	0	0	0	0	0	0	0	0	0	0	0	1.00012209	0	0	0	0	0	0	0	0	0	0	0	0	0	0	0	0	0	0	0	0	0	0	0	4.001954397	0	0
ENSDARG00000010962	0	0	0	0	0	0	0	0	0	0	0	1.00012209	0	0	0	0	0	11.01479701	0	0	0	0	1.00012209	0	0	0	0	0	0	0	0	0	0	0	0	0	0	0	0	4.001954397	0	0	0	0	0	0	3.00109917	0	0
ENSDARG00000010965	1.00012209	0	0	1.00012209	0	0	0	2.00048844	0	1.00012209	0	0	0	0	0	0	0	1.00012209	1.00012209	0	0	0	1.00012209	0	0	0	0	0	0	0	0	0	0	0	0	0	0	0	0	1.00012209	0	1.00012209	0	0	0	0	3.00109917	0	0
ENSDARG00000010977	0	0	0	0	0	0	0	0	0	0	0	0	0	0	0	0	0	1.00012209	0	0	0	0	0	0	0	0	0	0	0	0	0	1.00012209	0	0	0	0	0	0	0	0	0	0	0	0	0	0	0	0	0
ENSDARG00000010978	0	0	0	0	0	0	0	0	0	0	0	0	0	0	0	0	0	0	0	0	0	0	0	0	0	0	0	0	0	0	0	0	0	0	0	0	0	0	0	0	0	0	0	0	0	0	0	0	0
ENSDARG00000010981	0	0	0	0	0	0	0	0	0	0	0	0	0	0	0	0	0	0	1.00012209	0	0	0	0	0	0	0	0	0	0	0	0	0	0	0	0	0	0	0	0	0	0	0	0	0	0	0	0	0	0
ENSDARG00000010995	0	0	0	0	0	0	0	0	0	0	0	0	0	0	0	0	0	0	0	0	0	0	0	0	0	0	0	0	0	0	0	0	0	0	0	0	0	0	0	0	0	0	0	0	0	0	0	0	0
ENSDARG00000011000	0	0	0	0	0	0	0	0	0	3.00109917	0	0	0	0	0	0	0	1.00012209	0	2.00048844	0	0	1.00012209	0	0	0	0	0	0	0	0	0	0	0	0	0	0	0	0	0	0	0	0	0	0	0	0	0	0
ENSDARG00000011020	1.00012209	0	1.00012209	0	0	0	2.00048844	1.00012209	0	2.00048844	0	1.00012209	0	0	1.00012209	0	0	6.004398828	0	0	0	0	6.004398828	0	0	0	0	0	0	0	0	4.001954397	2.00048844	0	2.00048844	0	2.00048844	0	0	1.00012209	0	0	0	0	0	0	3.00109917	0	0
ENSDARG00000011023	0	0	0	0	0	0	0	0	0	0	0	0	0	0	0	0	0	0	0	0	0	0	0	0	0	0	0	0	0	0	0	0	0	0	0	0	0	0	0	0	0	0	0	0	0	0	0	0	0
ENSDARG00000011026	1.00012209	0	0	0	0	1.00012209	0	0	0	0	0	1.00012209	0	0	0	0	0	1.00012209	0	0	0	0	0	0	0	0	0	0	0	0	0	0	0	0	0	0	1.00012209	0	0	0	0	0	0	0	0	0	0	0	0
ENSDARG00000011027	0	0	0	0	0	0	0	0	0	0	0	0	0	0	0	0	0	0	0	0	0	0	0	0	0	0	0	0	0	0	0	0	0	0	0	0	0	0	0	0	0	0	0	0	0	0	0	0	0
ENSDARG00000011049	0	0	0	0	0	0	0	0	0	0	0	0	0	0	2.00048844	0	0	1.00012209	0	0	0	0	0	0	0	0	0	0	0	0	0	0	0	0	0	0	0	0	0	0	0	0	0	0	0	0	0	0	0
ENSDARG00000011055	1.00012209	0	0	0	0	0	0	0	0	1.00012209	0	0	0	0	0	0	0	3.00109917	0	0	0	0	1.00012209	0	2.00048844	0	0	0	0	0	0	0	0	0	0	0	0	0	0	0	0	2.00048844	0	1.00012209	0	0	1.00012209	0	0
ENSDARG00000011065	0	0	0	0	0	0	0	0	0	0	0	0	0	0	0	0	0	0	0	0	0	0	0	0	0	0	0	0	0	0	0	0	0	0	0	0	0	0	0	0	0	0	0	0	0	0	0	0	0
ENSDARG00000011072	0	0	1.00012209	0	0	0	0	0	0	0	0	0	0	0	0	0	0	0	0	0	0	0	0	0	0	0	0	0	0	0	0	0	0	0	0	0	0	0	0	0	0	0	0	0	0	0	0	0	0
ENSDARG00000011076	0	0	0	0	0	0	0	0	0	0	0	0	0	0	0	0	0	0	0	0	0	0	0	0	0	0	0	0	0	0	0	0	0	0	0	0	0	0	0	0	0	0	0	0	0	0	0	0	0
ENSDARG00000011079	0	0	0	0	0	0	0	0	0	0	0	0	0	0	0	0	0	3.00109917	0	0	0	0	2.00048844	0	0	0	0	0	0	0	0	0	0	0	0	0	1.00012209	0	0	0	0	0	0	0	0	0	0	0	0
ENSDARG00000011088	0	0	0	0	0	0	0	0	0	0	0	0	0	0	0	0	0	0	0	0	0	0	0	0	0	0	0	0	0	0	0	0	0	0	0	0	0	0	0	0	0	0	0	0	0	0	0	0	0
ENSDARG00000011122	0	1.00012209	0	0	0	0	0	0	0	5.003054244	0	0	0	0	2.00048844	0	0	0	0	0	0	0	2.00048844	0	0	0	0	0	0	0	0	0	0	0	0	0	0	0	0	0	0	0	0	0	0	0	2.00048844	0	0
ENSDARG00000011125	0	0	1.00012209	0	0	0	1.00012209	0	0	0	0	0	0	0	0	1.00012209	0	2.00048844	1.00012209	0	0	0	0	0	0	0	0	0	0	0	1.00012209	0	0	1.00012209	0	0	0	0	0	0	0	0	0	0	0	0	4.001954397	0	0
ENSDARG00000011127	0	0	0	0	0	0	0	2.00048844	0	0	0	0	0	0	0	1.00012209	0	0	0	0	0	0	1.00012209	0	0	0	0	0	0	0	0	0	0	0	0	0	0	0	0	0	0	0	0	0	0	1.00012209	2.00048844	0	0
ENSDARG00000011146	0	0	0	0	0	0	0	2.00048844	0	11.01479701	0	0	0	0	0	0	0	1.00012209	0	0	0	0	0	0	1.00012209	0	0	0	0	0	0	1.00012209	0	0	0	0	0	0	0	0	0	0	0	0	0	0	3.00109917	0	0
ENSDARG00000011152	0	0	0	0	0	0	0	0	0	2.00048844	0	0	0	0	0	0	0	0	0	0	0	0	0	0	0	0	0	0	0	0	0	0	0	0	0	0	0	0	0	0	0	0	0	0	0	0	0	0	0
ENSDARG00000011157	0	0	0	0	0	0	0	0	0	0	0	0	0	0	0	0	0	0	0	0	0	0	1.00012209	0	0	0	0	0	0	0	0	0	0	0	0	0	0	0	0	0	0	0	0	0	0	0	0	0	0
ENSDARG00000011170	0	0	0	0	0	0	3.00109917	0	0	6.004398828	0	0	0	0	0	0	0	1.00012209	4.001954397	0	0	2.00048844	0	0	2.00048844	0	0	0	0	1.00012209	2.00048844	0	4.001954397	0	0	1.00012209	0	0	0	0	0	0	0	2.00048844	0	0	0	0	0
ENSDARG00000011171	0	0	0	0	0	0	0	0	0	0	0	0	0	0	0	0	0	0	0	0	0	0	0	0	0	0	0	0	0	0	0	0	0	0	0	0	0	0	0	0	0	0	0	0	0	0	0	0	0
ENSDARG00000011175	0	0	0	0	0	0	0	2.00048844	0	0	0	0	0	0	0	0	0	2.00048844	0	0	0	0	0	0	0	0	0	0	0	0	0	1.00012209	0	0	0	0	0	0	0	0	0	1.00012209	0	0	0	0	0	0	0
ENSDARG00000011186	0	0	0	0	0	0	1.00012209	0	0	0	0	0	0	0	0	0	0	1.00012209	0	0	0	0	0	0	0	0	0	0	0	0	0	0	0	1.00012209	0	0	1.00012209	0	0	0	0	0	0	0	0	0	0	0	0
ENSDARG00000011188	0	0	0	0	0	0	0	0	0	4.001954397	0	0	0	0	0	0	0	4.001954397	0	0	0	0	0	0	0	0	0	0	0	0	0	0	0	0	0	0	1.00012209	0	0	0	0	0	0	0	0	0	1.00012209	0	0
ENSDARG00000011196	0	0	0	0	0	0	0	0	0	1.00012209	0	0	0	0	0	0	0	0	0	0	0	0	0	0	0	0	0	0	0	0	0	0	0	3.00109917	0	0	0	0	0	1.00012209	0	0	0	0	0	0	0	0	0
ENSDARG00000011201	7.005988269	3.00109917	3.00109917	3.00109917	0	1.00012209	3.00109917	28.09614152	0	19.04420413	0	5.003054244	0	1.00012209	7.005988269	1.00012209	0	83.85247827	8.007822687	0	0	2.00048844	51.32016528	0	3.00109917	0	2.00048844	1.00012209	1.00012209	0	17.03537624	8.007822687	18.03966704	1.00012209	8.007822687	3.00109917	6.004398828	0	0	16.03133162	0	0	1.00012209	1.00012209	0	1.00012209	80.7915739	0	0
ENSDARG00000011208	0	0	0	0	0	0	0	0	0	2.00048844	0	0	0	0	0	0	0	1.00012209	0	0	0	0	0	0	0	0	0	0	0	0	0	0	0	0	1.00012209	0	0	0	0	0	0	0	0	1.00012209	0	0	0	0	0
ENSDARG00000011219	1.00012209	0	0	0	0	0	0	3.00109917	0	1.00012209	0	2.00048844	0	0	0	0	0	8.007822687	4.001954397	0	0	0	1.00012209	0	0	0	0	0	0	0	0	0	0	0	1.00012209	0	0	0	0	0	0	0	0	0	0	0	3.00109917	0	0
ENSDARG00000011222	0	0	0	0	0	0	0	0	0	0	0	0	0	0	0	0	0	0	0	0	0	0	0	0	0	0	0	0	0	0	0	0	0	0	0	0	0	0	0	0	0	0	0	0	0	0	0	0	0
ENSDARG00000011233	0	0	0	0	0	0	0	2.00048844	0	1.00012209	0	0	0	0	0	0	0	0	0	0	0	0	1.00012209	0	0	0	0	0	0	0	0	0	0	0	0	0	0	0	0	1.00012209	0	1.00012209	0	0	0	0	2.00048844	0	0
ENSDARG00000011240	0	0	0	0	0	0	0	0	0	0	0	0	0	0	0	0	0	0	0	0	0	0	0	0	0	0	0	0	0	0	1.00012209	0	0	0	0	0	0	0	0	0	0	0	0	0	0	0	1.00012209	0	0
ENSDARG00000011246	0	0	0	0	0	0	0	0	0	0	0	0	0	0	0	0	0	3.00109917	0	0	0	0	0	0	0	0	0	0	0	0	0	0	0	0	3.00109917	0	0	0	0	0	0	0	0	0	0	0	4.001954397	0	0
ENSDARG00000011247	0	0	0	1.00012209	0	0	0	1.00012209	0	1.00012209	0	0	0	0	0	0	0	0	0	0	0	0	0	0	0	0	0	0	0	0	0	0	0	0	0	0	0	0	0	0	0	0	0	0	0	0	0	0	0
ENSDARG00000011259	0	0	0	0	0	0	0	0	0	0	0	0	0	0	0	0	0	0	0	0	0	0	0	0	0	0	0	0	0	0	0	0	0	0	0	0	0	0	0	0	0	0	0	0	0	0	0	0	0
ENSDARG00000011272	0	0	0	0	0	0	0	0	0	3.00109917	0	0	0	0	0	0	0	2.00048844	0	0	0	0	0	0	0	0	0	0	0	0	0	0	0	0	0	0	0	0	0	0	0	0	0	0	0	0	0	0	0
ENSDARG00000011281	0	0	0	0	0	0	0	0	0	4.001954397	0	0	0	0	0	0	0	1.00012209	0	0	0	0	0	0	0	0	0	0	0	0	0	0	0	0	0	0	0	0	0	0	0	0	0	0	0	0	0	0	0
ENSDARG00000011298	0	0	0	0	0	0	0	0	0	1.00012209	0	0	0	0	0	0	0	0	0	0	0	0	1.00012209	0	0	0	0	0	0	0	1.00012209	0	0	0	0	0	0	0	0	0	0	0	0	0	0	0	3.00109917	0	0
ENSDARG00000011299	0	0	0	0	0	0	0	0	0	1.00012209	0	0	0	0	0	0	0	0	0	0	0	0	0	0	0	0	0	0	0	0	1.00012209	0	0	0	0	0	0	0	0	1.00012209	0	0	0	0	0	0	1.00012209	0	0
ENSDARG00000011301	0	0	0	0	0	0	0	2.00048844	0	3.00109917	0	0	0	0	0	0	0	3.00109917	0	0	0	0	0	0	0	0	0	0	0	0	0	0	0	0	0	0	0	0	0	0	0	0	0	0	0	0	0	0	0
ENSDARG00000011312	0	0	0	0	0	0	0	0	0	0	0	0	0	0	0	0	0	0	0	0	0	0	0	0	0	0	0	0	0	0	1.00012209	0	0	0	0	0	0	0	0	0	0	0	0	0	0	0	0	0	0
ENSDARG00000011333	1.00012209	0	0	0	0	0	0	0	0	0	0	0	0	0	0	0	0	0	0	0	0	0	0	0	0	0	0	0	0	0	0	0	0	0	0	0	0	0	0	0	0	0	0	0	0	0	1.00012209	0	0
ENSDARG00000011334	0	0	0	0	0	0	0	0	0	1.00012209	0	0	0	0	0	0	0	0	0	0	0	0	0	0	0	0	0	0	0	0	0	0	0	1.00012209	0	0	0	0	0	0	0	0	0	0	0	0	0	0	0
ENSDARG00000011360	0	0	0	0	0	0	0	0	0	0	0	0	0	0	0	0	0	1.00012209	0	0	0	0	0	0	0	0	0	0	0	0	0	1.00012209	0	0	0	0	0	0	0	0	0	0	0	0	0	0	0	0	0
ENSDARG00000011370	0	0	0	0	0	0	0	0	0	0	0	0	0	0	0	0	0	0	0	0	0	0	0	0	0	0	0	0	0	0	0	0	0	0	0	0	0	0	0	0	0	0	0	0	0	0	0	0	0
ENSDARG00000011371	0	0	0	0	0	0	1.00012209	0	0	0	0	2.00048844	0	0	2.00048844	1.00012209	0	0	4.001954397	0	0	0	2.00048844	0	0	0	0	0	0	0	6.004398828	1.00012209	4.001954397	0	1.00012209	0	4.001954397	0	0	0	0	0	0	0	0	0	4.001954397	0	0
ENSDARG00000011373	1.00012209	0	0	0	0	0	0	0	0	2.00048844	0	0	0	0	0	0	0	0	0	0	0	0	0	0	0	0	0	0	0	0	1.00012209	0	0	0	0	0	0	0	0	0	0	0	0	0	0	0	0	0	0
ENSDARG00000011376	1.00012209	0	0	0	0	0	0	0	0	0	0	1.00012209	0	0	0	0	0	0	0	0	0	0	0	0	0	0	0	0	0	0	0	0	0	0	4.001954397	0	6.004398828	0	0	0	0	0	0	0	0	0	2.00048844	0	0
ENSDARG00000011390	0	0	0	0	0	0	0	0	0	0	0	0	0	0	0	0	0	1.00012209	0	0	0	0	1.00012209	0	0	0	0	0	0	0	0	1.00012209	0	0	0	0	0	0	0	0	0	5.003054244	0	0	0	0	0	0	0
ENSDARG00000011400	1.00012209	1.00012209	1.00012209	0	2.00048844	3.00109917	0	1.00012209	2.00048844	226.1286654	0	1.00012209	2.00048844	0	2.00048844	0	0	1.00012209	0	0	0	8.007822687	4.001954397	1.00012209	31.11790484	1.00012209	1.00012209	0	0	2.00048844	0	1.00012209	0	5.003054244	2.00048844	3.00109917	0	0	0	0	0	20.04898766	0	1.00012209	0	0	5.003054244	0	0
ENSDARG00000011404	0	0	0	0	0	0	0	0	0	0	0	0	0	0	0	0	0	0	0	0	0	0	0	0	0	0	0	0	0	0	0	0	0	0	0	0	0	0	0	0	0	0	0	0	0	0	0	0	0
ENSDARG00000011405	10.01222694	2.00048844	2.00048844	0	1.00012209	0	1.00012209	31.11790484	0	35.15039348	0	11.01479701	3.00109917	1.00012209	8.007822687	2.00048844	0	78.75224103	21.05401772	0	0	0	71.62256125	0	7.005988269	0	0	0	0	0	30.11040269	4.001954397	25.07660581	3.00109917	13.02067364	2.00048844	7.005988269	0	0	28.09614152	0	0	0	1.00012209	0	0	92.02609036	0	0
ENSDARG00000011407	0	0	0	0	0	0	0	0	0	0	0	0	0	0	0	0	0	9.009902203	0	0	0	0	0	0	0	0	0	0	0	0	0	0	0	0	0	0	0	0	0	0	0	0	0	0	0	0	1.00012209	0	0
ENSDARG00000011408	0	0	0	0	0	0	0	0	0	1.00012209	0	0	0	0	2.00048844	0	0	4.001954397	0	0	0	0	3.00109917	0	1.00012209	0	0	0	0	0	2.00048844	0	0	0	1.00012209	0	0	0	0	0	0	0	0	0	0	0	2.00048844	0	0
ENSDARG00000011418	0	0	0	0	0	0	0	1.00012209	0	0	0	0	0	0	0	0	0	1.00012209	0	0	0	0	0	0	0	0	0	0	0	0	0	0	0	0	0	0	0	0	0	0	0	0	0	0	0	0	0	0	0
ENSDARG00000011422	0	0	0	0	0	0	0	0	0	0	0	0	0	0	0	0	0	0	0	0	0	1.00012209	5.003054244	0	0	0	0	0	0	0	0	0	0	0	1.00012209	0	0	0	0	0	0	0	0	0	0	0	0	0	0
ENSDARG00000011445	0	0	0	0	0	0	0	0	0	0	0	0	0	0	0	0	0	0	0	0	0	0	0	0	0	0	0	0	0	0	0	0	0	0	0	0	0	0	0	0	0	0	0	0	0	0	0	0	0
ENSDARG00000011449	3.00109917	0	0	0	0	0	0	0	0	0	0	0	0	0	0	0	0	0	1.00012209	0	0	0	0	0	0	0	0	0	0	0	0	0	0	0	0	0	0	0	0	0	0	0	0	0	0	0	0	0	0
ENSDARG00000011459	0	1.00012209	0	1.00012209	0	0	0	2.00048844	0	4.001954397	0	0	0	0	2.00048844	0	0	7.005988269	0	0	0	0	2.00048844	0	0	0	0	0	0	1.00012209	0	0	0	0	1.00012209	0	0	0	0	1.00012209	0	0	0	0	0	0	3.00109917	0	0
ENSDARG00000011462	0	0	0	0	0	0	0	0	0	2.00048844	0	0	0	1.00012209	0	0	0	4.001954397	0	0	0	0	0	0	0	0	0	0	0	0	0	0	0	0	0	0	0	0	0	0	0	0	0	0	0	0	0	0	0
ENSDARG00000011463	0	0	0	0	0	0	0	0	0	0	0	0	0	0	0	0	0	0	0	0	0	0	0	0	0	0	0	0	0	0	0	0	0	0	0	1.00012209	0	0	0	0	0	0	0	0	0	0	0	0	0
ENSDARG00000011466	0	0	0	0	0	0	0	2.00048844	0	0	0	0	0	0	0	0	0	3.00109917	0	0	0	0	0	0	0	0	0	0	0	0	0	0	0	0	0	0	1.00012209	0	0	0	0	0	0	0	0	0	0	0	0
ENSDARG00000011468	0	0	0	0	0	0	0	0	0	0	0	0	0	0	0	0	0	0	0	0	0	0	0	0	0	0	0	0	0	0	0	0	0	0	0	0	0	0	0	0	0	0	0	0	0	0	0	0	0
ENSDARG00000011473	0	0	0	0	0	0	0	0	0	0	0	0	0	0	1.00012209	0	0	0	0	0	0	0	1.00012209	0	0	0	0	0	0	0	0	0	0	0	0	0	0	0	0	0	0	0	0	0	0	0	0	0	0
ENSDARG00000011488	0	0	0	0	1.00012209	0	0	0	0	3.00109917	0	4.001954397	0	0	0	0	0	2.00048844	0	0	0	0	2.00048844	0	0	0	0	0	0	0	2.00048844	2.00048844	0	0	1.00012209	0	3.00109917	0	0	1.00012209	0	0	0	0	0	0	2.00048844	0	0
ENSDARG00000011490	0	0	0	1.00012209	0	0	0	0	0	0	0	0	0	0	0	0	0	2.00048844	0	0	0	0	0	0	0	0	0	0	0	0	0	0	0	0	0	0	0	0	0	0	0	0	0	0	0	0	0	0	0
ENSDARG00000011493	0	0	1.00012209	0	0	0	0	0	0	0	0	0	0	0	0	0	0	0	0	0	0	0	0	0	0	0	0	0	0	0	0	0	0	0	0	0	0	0	0	0	0	0	0	0	0	0	0	0	0
ENSDARG00000011496	0	0	0	0	0	0	0	0	0	1.00012209	0	0	0	0	0	0	0	1.00012209	0	0	0	0	1.00012209	0	0	0	0	0	0	0	0	0	0	0	2.00048844	0	0	0	0	1.00012209	0	0	0	0	0	0	3.00109917	0	0
ENSDARG00000011498	0	0	0	0	0	0	0	0	0	3.00109917	0	0	0	0	0	0	0	0	0	0	0	0	0	0	0	0	0	0	0	0	0	0	0	0	0	0	0	0	0	0	0	1.00012209	0	0	0	0	0	0	0
ENSDARG00000011506	0	0	0	0	0	0	0	0	0	0	0	0	0	0	0	0	0	0	0	0	0	0	0	0	0	0	0	0	0	0	0	0	0	0	0	0	0	0	0	1.00012209	0	0	0	0	0	0	0	0	0
ENSDARG00000011510	0	0	0	0	0	0	1.00012209	0	0	0	0	0	0	0	0	0	0	2.00048844	0	0	0	0	0	0	1.00012209	0	0	0	0	0	0	0	0	0	0	0	0	0	0	1.00012209	0	0	0	0	0	0	0	0	0
ENSDARG00000011511	0	0	0	0	0	0	0	0	0	0	0	0	0	0	0	0	0	0	0	0	0	0	0	0	0	0	0	0	0	0	0	0	0	0	0	0	0	0	0	0	0	0	0	0	0	0	0	0	0
ENSDARG00000011515	0	0	0	0	0	0	0	0	0	0	0	0	0	0	0	0	0	3.00109917	0	0	0	0	0	0	0	0	0	0	0	1.00012209	1.00012209	0	0	0	1.00012209	0	0	0	0	0	0	0	0	0	0	0	0	0	0
ENSDARG00000011520	0	0	0	0	0	0	0	0	0	0	0	0	0	0	0	0	0	0	0	0	0	0	0	0	0	0	0	0	0	0	0	0	0	0	0	0	0	0	0	0	0	0	0	0	0	0	0	0	0
ENSDARG00000011521	0	0	0	0	0	0	0	0	0	0	0	0	0	0	1.00012209	0	0	0	0	0	0	0	0	0	0	0	0	0	0	0	0	0	0	0	0	0	0	0	0	0	0	0	0	0	0	0	0	0	0
ENSDARG00000011533	0	0	0	0	0	0	0	0	0	0	0	0	0	0	1.00012209	0	0	0	0	0	0	0	0	0	0	0	0	0	0	0	0	0	0	0	0	0	0	0	0	0	0	0	0	0	0	0	0	0	0
ENSDARG00000011537	0	0	0	0	0	0	0	0	0	0	0	0	0	0	0	0	0	1.00012209	0	0	0	0	0	0	0	0	0	0	0	0	0	0	0	0	0	0	0	0	0	0	0	0	0	0	0	0	0	0	0
ENSDARG00000011538	0	1.00012209	1.00012209	0	1.00012209	1.00012209	0	1.00012209	1.00012209	77.73295522	0	2.00048844	2.00048844	2.00048844	0	0	0	1.00012209	1.00012209	0	0	5.003054244	1.00012209	0	42.21681544	1.00012209	2.00048844	0	0	0	3.00109917	5.003054244	1.00012209	7.005988269	0	0	0	0	0	0	0	7.005988269	0	2.00048844	0	0	6.004398828	0	0
ENSDARG00000011545	0	0	0	0	0	0	0	3.00109917	0	1.00012209	0	0	0	0	0	0	0	0	0	0	0	0	2.00048844	0	0	0	0	0	0	0	0	0	1.00012209	0	0	1.00012209	0	0	0	0	0	0	0	0	0	0	8.007822687	0	0
ENSDARG00000011553	1.00012209	0	0	1.00012209	0	2.00048844	0	4.001954397	0	64.50527014	1.00012209	0	1.00012209	0	1.00012209	0	0	18.03966704	1.00012209	0	0	0	0	0	8.007822687	1.00012209	1.00012209	0	0	1.00012209	1.00012209	4.001954397	2.00048844	2.00048844	1.00012209	0	2.00048844	0	0	2.00048844	0	1.00012209	0	1.00012209	0	0	8.007822687	0	0
ENSDARG00000011555	0	0	0	0	0	0	0	2.00048844	0	12.01761253	0	0	0	0	0	0	0	1.00012209	1.00012209	0	0	0	0	0	1.00012209	0	0	0	0	0	1.00012209	0	0	2.00048844	5.003054244	0	0	0	0	0	0	0	0	0	0	0	3.00109917	0	0
ENSDARG00000011564	2.00048844	0	0	0	0	0	1.00012209	1.00012209	0	6.004398828	0	0	0	0	0	1.00012209	0	7.005988269	2.00048844	0	0	0	2.00048844	0	0	0	0	0	0	0	1.00012209	0	2.00048844	0	1.00012209	0	0	0	0	1.00012209	0	0	0	1.00012209	0	0	7.005988269	0	0
ENSDARG00000011570	0	0	0	0	0	0	0	0	0	0	0	0	0	0	0	0	0	0	0	0	0	0	0	0	0	0	0	0	0	0	0	0	0	0	0	0	0	0	0	0	0	0	0	0	0	0	0	0	0
ENSDARG00000011571	0	0	0	0	0	0	0	0	0	0	0	1.00012209	0	0	0	0	0	1.00012209	1.00012209	0	0	0	0	0	0	0	0	0	0	0	2.00048844	0	1.00012209	0	5.003054244	0	0	0	0	1.00012209	0	0	0	0	0	0	5.003054244	0	0
ENSDARG00000011573	0	0	0	0	0	0	0	0	0	0	0	0	0	0	0	0	0	0	0	0	0	0	0	0	0	0	0	0	0	0	0	0	0	0	0	0	0	0	0	0	0	0	0	0	0	0	0	0	0
ENSDARG00000011581	0	0	0	0	0	0	0	0	0	0	0	0	0	0	0	0	0	0	0	0	0	0	1.00012209	0	0	0	0	0	0	0	0	2.00048844	0	0	0	0	0	0	0	0	0	0	0	0	0	0	0	0	0
ENSDARG00000011582	0	0	0	0	0	0	0	0	0	0	0	0	0	0	0	0	0	0	0	0	0	0	0	0	0	0	0	0	0	0	0	0	1.00012209	0	0	0	0	0	0	0	0	0	0	0	0	0	0	0	0
ENSDARG00000011583	0	0	0	0	0	0	0	0	0	3.00109917	0	0	0	0	0	0	0	0	0	0	0	0	0	0	0	0	0	0	0	0	0	0	1.00012209	0	0	0	0	0	0	0	0	0	0	0	0	0	0	0	0
ENSDARG00000011594	0	0	0	0	0	0	0	0	0	0	0	0	0	0	1.00012209	0	0	1.00012209	0	0	0	0	0	0	0	0	0	0	0	0	0	0	0	0	0	0	0	0	0	0	0	0	0	0	0	0	0	0	0
ENSDARG00000011597	1.00012209	0	0	0	0	0	0	1.00012209	0	0	0	0	0	0	0	0	0	0	1.00012209	0	0	0	1.00012209	0	0	0	0	0	0	0	1.00012209	2.00048844	0	0	0	0	0	0	0	1.00012209	0	0	0	0	0	0	4.001954397	0	0
ENSDARG00000011600	0	0	0	0	0	0	0	0	0	0	0	0	0	0	0	0	0	4.001954397	0	0	0	0	0	0	0	0	0	0	0	0	0	0	0	0	0	0	0	0	0	0	0	0	0	0	0	0	1.00012209	0	0
ENSDARG00000011602	0	0	0	0	0	0	0	0	0	0	0	0	0	0	0	0	0	0	0	0	0	0	0	0	0	0	0	0	0	0	0	0	0	0	0	0	0	0	0	0	0	0	0	0	0	0	0	0	0
ENSDARG00000011605	0	0	0	0	0	0	0	0	0	0	0	0	0	0	0	0	0	0	0	0	0	0	0	0	0	0	0	0	0	0	0	0	0	0	0	0	0	0	0	0	0	0	0	0	0	0	0	0	0
ENSDARG00000011609	0	0	0	0	0	0	0	1.00012209	0	2.00048844	0	0	0	0	0	0	0	0	0	0	0	0	2.00048844	0	1.00012209	0	0	0	0	0	0	0	1.00012209	0	2.00048844	0	0	0	0	0	0	0	0	0	0	0	1.00012209	0	0
ENSDARG00000011611	0	0	0	0	1.00012209	0	1.00012209	0	0	0	0	1.00012209	0	0	1.00012209	0	0	6.004398828	0	0	0	0	1.00012209	0	1.00012209	0	0	0	0	0	0	0	1.00012209	1.00012209	0	0	0	0	0	0	0	0	0	0	0	0	4.001954397	0	0
ENSDARG00000011613	0	0	0	0	0	0	0	1.00012209	0	3.00109917	0	0	0	0	2.00048844	0	0	3.00109917	3.00109917	0	0	0	0	0	0	0	0	0	0	0	0	0	1.00012209	0	0	0	2.00048844	0	0	0	0	2.00048844	0	0	0	0	0	0	0
ENSDARG00000011615	1.00012209	3.00109917	0	2.00048844	4.001954397	12.01761253	0	2.00048844	3.00109917	279.3104045	0	4.001954397	7.005988269	0	1.00012209	0	0	3.00109917	1.00012209	0	0	27.08938227	6.004398828	0	21.05401772	3.00109917	3.00109917	1.00012209	0	5.003054244	4.001954397	3.00109917	0	16.03133162	1.00012209	5.003054244	4.001954397	1.00012209	0	0	0	18.03966704	2.00048844	13.02067364	0	0	5.003054244	0	0
ENSDARG00000011618	0	0	0	0	0	0	0	0	0	0	0	0	0	0	0	0	0	0	0	0	0	0	0	0	0	0	0	0	0	0	2.00048844	0	0	0	0	0	0	0	0	0	0	0	0	0	0	0	0	0	0
ENSDARG00000011636	0	0	0	0	0	0	0	0	0	0	0	0	0	0	0	0	0	0	1.00012209	0	0	0	0	0	0	0	0	0	0	0	0	0	1.00012209	0	0	0	0	0	0	0	0	0	0	0	0	0	0	0	0
ENSDARG00000011637	0	0	0	0	0	1.00012209	0	1.00012209	0	5.003054244	0	0	0	0	0	0	0	4.001954397	1.00012209	0	0	0	0	2.00048844	1.00012209	0	0	0	0	0	1.00012209	0	0	0	0	0	1.00012209	0	0	0	0	0	0	0	0	0	5.003054244	0	0
ENSDARG00000011648	0	0	0	1.00012209	0	0	0	0	0	0	0	0	0	0	1.00012209	0	0	2.00048844	0	0	0	0	0	0	0	0	0	0	0	0	1.00012209	0	0	0	0	0	0	0	0	0	0	0	0	0	0	0	3.00109917	0	0
ENSDARG00000011652	0	0	0	0	0	0	0	0	0	0	0	0	0	0	0	0	0	0	0	0	0	0	0	0	0	0	0	0	0	0	0	0	0	0	0	0	0	0	0	0	0	0	0	0	0	0	0	0	0
ENSDARG00000011661	0	0	0	0	0	0	0	0	0	0	0	0	0	0	0	0	0	0	0	0	0	0	0	0	0	0	0	0	0	0	0	0	0	0	0	0	0	0	0	0	0	0	0	0	0	0	0	0	0
ENSDARG00000011662	0	0	1.00012209	0	0	0	0	0	0	2.00048844	0	1.00012209	0	0	0	0	0	1.00012209	0	0	0	0	0	0	0	0	0	0	0	0	0	0	0	0	0	0	1.00012209	0	0	0	0	0	0	0	0	0	4.001954397	0	0
ENSDARG00000011665	6.004398828	1.00012209	3.00109917	4.001954397	2.00048844	10.01222694	3.00109917	39.18685599	3.00109917	220.8482728	0	6.004398828	0	0	8.007822687	1.00012209	0	73.65834658	9.009902203	1.00012209	2.00048844	6.004398828	96.119021	0	24.07058837	2.00048844	1.00012209	1.00012209	0	2.00048844	13.02067364	17.03537624	12.01761253	13.02067364	6.004398828	1.00012209	5.003054244	3.00109917	0	14.02398044	0	14.02398044	0	7.005988269	1.00012209	2.00048844	201.8950256	1.00012209	0
ENSDARG00000011666	0	0	0	0	0	0	0	0	0	1.00012209	0	0	0	0	0	0	0	0	0	0	0	0	0	0	0	0	0	0	0	0	0	0	0	0	0	0	0	0	0	0	0	0	0	0	0	0	0	0	0
ENSDARG00000011671	0	0	0	0	0	0	0	0	0	0	0	0	0	0	0	0	0	0	0	0	0	0	0	0	0	0	0	0	0	0	0	0	0	0	0	0	0	0	0	0	0	0	0	0	0	0	0	0	0
ENSDARG00000011673	0	0	0	0	0	0	0	0	0	0	0	0	0	0	0	0	0	0	0	0	0	0	0	0	0	0	0	0	0	0	0	0	0	0	0	0	0	0	0	1.00012209	0	0	0	0	0	0	0	0	0
ENSDARG00000011683	0	0	0	0	0	0	0	0	0	0	0	0	0	0	0	0	0	0	0	0	0	0	0	0	0	0	0	0	0	0	0	0	0	0	0	0	0	0	0	0	0	0	0	0	0	0	0	0	0
ENSDARG00000011696	0	0	0	0	0	0	0	0	0	0	0	0	0	0	0	0	0	0	0	0	0	0	1.00012209	0	0	0	0	0	0	0	0	0	0	0	0	0	0	0	0	0	0	0	0	0	0	0	0	0	0
ENSDARG00000011701	0	0	0	0	0	0	0	0	0	0	0	0	0	0	0	0	0	0	0	0	0	0	0	0	0	0	0	0	0	0	0	0	0	0	0	0	0	0	0	0	0	0	0	0	0	0	0	0	0
ENSDARG00000011703	0	0	0	0	0	0	0	0	0	0	0	0	0	0	0	0	0	0	0	0	0	0	0	0	0	0	0	0	0	0	0	0	0	0	0	0	0	0	0	0	0	0	0	0	0	0	0	0	0
ENSDARG00000011723	0	0	0	0	0	0	0	0	0	1.00012209	0	0	0	0	0	0	0	0	0	0	0	0	1.00012209	0	0	0	0	0	0	0	0	0	0	0	0	0	0	0	0	0	0	0	0	0	0	0	0	0	0
ENSDARG00000011724	0	0	0	0	0	0	0	1.00012209	0	0	0	0	0	0	0	0	0	1.00012209	0	0	0	0	3.00109917	0	0	0	0	0	0	0	0	0	1.00012209	0	0	0	0	0	0	1.00012209	0	0	0	0	0	0	1.00012209	0	1.00012209
ENSDARG00000011727	0	0	0	0	0	0	0	0	0	1.00012209	0	0	0	0	0	0	0	0	0	0	0	0	0	0	0	0	0	0	0	0	0	0	0	0	0	0	0	0	0	0	0	0	0	0	0	0	0	0	0
ENSDARG00000011740	0	0	0	0	0	0	0	0	0	4.001954397	0	0	0	0	1.00012209	0	0	4.001954397	0	0	0	1.00012209	3.00109917	0	2.00048844	0	0	0	0	0	0	0	0	0	0	0	0	0	0	1.00012209	0	1.00012209	0	0	0	0	1.00012209	0	0
ENSDARG00000011743	0	0	0	0	0	0	0	0	0	0	0	0	0	0	0	0	0	0	0	0	0	0	0	0	1.00012209	0	0	0	0	0	0	0	0	0	0	0	0	0	0	0	0	0	0	0	0	0	0	0	0
ENSDARG00000011764	0	0	0	0	0	0	0	0	0	0	0	0	0	0	0	0	0	1.00012209	0	0	0	0	1.00012209	0	0	0	0	0	0	0	2.00048844	0	0	0	0	0	0	0	0	0	0	0	0	0	0	0	2.00048844	0	0
ENSDARG00000011769	0	0	0	0	0	0	0	0	0	0	0	1.00012209	0	0	0	0	0	0	0	0	0	0	0	0	0	0	0	0	0	0	0	0	0	0	0	0	0	0	0	0	0	0	0	0	0	0	1.00012209	0	0
ENSDARG00000011770	0	0	0	0	0	0	0	0	0	0	0	0	0	0	0	0	0	0	0	0	0	0	0	0	0	0	0	0	0	0	0	0	0	0	0	0	0	0	0	0	0	0	0	0	0	0	1.00012209	0	0
ENSDARG00000011777	0	0	0	0	0	0	0	0	0	0	0	0	0	0	0	0	0	1.00012209	0	0	0	0	0	0	0	0	0	0	0	0	0	0	0	0	0	0	0	0	0	1.00012209	0	0	0	0	0	0	0	0	0
ENSDARG00000011783	0	0	0	0	0	0	0	0	0	2.00048844	0	2.00048844	0	0	0	0	0	1.00012209	0	0	0	0	2.00048844	0	0	0	0	0	0	0	0	0	0	0	1.00012209	0	1.00012209	0	0	1.00012209	0	0	0	0	1.00012209	0	1.00012209	0	0
ENSDARG00000011785	0	0	0	0	0	0	0	0	0	2.00048844	0	0	0	0	0	0	0	0	0	0	0	0	0	0	0	0	0	0	0	0	0	0	0	0	0	0	0	0	0	0	0	0	0	0	0	0	0	0	0
ENSDARG00000011797	0	0	0	0	0	0	0	0	0	0	0	0	0	0	0	0	0	1.00012209	0	0	0	0	0	0	0	0	0	0	0	0	0	0	0	0	0	0	0	0	0	0	0	0	0	0	0	0	0	0	0
ENSDARG00000011801	0	0	0	0	0	0	0	1.00012209	0	0	0	0	0	0	0	0	0	0	0	0	0	0	0	0	0	0	0	0	0	0	0	0	0	0	0	0	0	0	0	0	0	0	0	0	0	0	0	0	0
ENSDARG00000011809	0	0	0	0	0	0	0	0	0	0	0	0	0	0	0	0	0	1.00012209	0	0	0	0	0	0	0	0	0	0	0	0	0	0	0	0	0	1.00012209	3.00109917	0	0	0	0	0	0	0	0	0	3.00109917	0	0
ENSDARG00000011818	0	0	0	0	0	0	0	0	0	0	0	0	0	0	0	0	0	0	0	0	0	0	0	0	0	0	0	0	0	0	0	0	0	0	0	0	0	0	0	0	0	0	0	0	0	0	0	0	0
ENSDARG00000011819	1.00012209	0	0	0	0	0	0	0	0	0	0	0	0	0	0	0	0	1.00012209	0	0	0	0	0	0	0	0	0	0	0	0	0	0	0	0	0	0	0	0	0	0	0	0	0	0	0	0	1.00012209	0	0
ENSDARG00000011821	0	1.00012209	0	0	0	0	0	1.00012209	0	0	0	0	0	0	2.00048844	1.00012209	0	36.15913625	8.007822687	0	0	0	26.08287041	0	0	0	0	0	0	0	0	1.00012209	1.00012209	0	1.00012209	0	2.00048844	0	0	2.00048844	0	2.00048844	0	0	0	0	22.05929444	0	0
ENSDARG00000011824	0	0	0	0	0	0	0	0	0	2.00048844	0	0	0	0	2.00048844	0	0	0	1.00012209	0	0	3.00109917	10.01222694	0	1.00012209	0	0	0	0	2.00048844	0	0	0	1.00012209	0	0	0	0	0	1.00012209	0	9.009902203	0	1.00012209	0	0	1.00012209	0	0
ENSDARG00000011825	0	0	0	0	0	0	0	0	0	0	0	0	0	0	0	0	0	1.00012209	0	0	0	0	0	0	0	0	0	0	0	0	0	0	0	0	0	0	0	0	0	0	0	0	0	0	0	0	0	0	0
ENSDARG00000011830	0	0	0	0	0	0	0	1.00012209	0	1.00012209	0	0	0	0	0	0	0	1.00012209	0	0	0	0	0	0	0	0	0	0	0	0	0	0	0	0	0	0	0	0	0	0	0	0	0	0	0	0	0	0	0
ENSDARG00000011837	0	0	0	0	0	0	0	0	0	0	0	0	0	0	0	0	0	0	0	0	0	0	0	0	0	0	0	0	0	0	0	0	0	0	0	0	0	0	0	0	0	0	0	0	0	0	0	0	0
ENSDARG00000011841	3.00109917	0	1.00012209	0	0	1.00012209	2.00048844	0	0	57.40032473	0	3.00109917	1.00012209	0	2.00048844	0	0	15.02753306	2.00048844	0	0	2.00048844	6.004398828	0	6.004398828	0	0	2.00048844	0	0	3.00109917	2.00048844	3.00109917	1.00012209	6.004398828	2.00048844	2.00048844	0	0	2.00048844	0	3.00109917	0	1.00012209	0	0	10.01222694	0	0
ENSDARG00000011845	0	0	0	0	0	0	0	0	0	1.00012209	0	0	0	0	0	0	0	0	0	0	0	0	0	0	0	0	0	0	0	0	2.00048844	0	0	0	0	0	0	0	0	0	0	0	0	0	0	0	0	0	0
ENSDARG00000011851	1.00012209	0	0	0	0	0	0	0	0	0	0	0	0	0	0	0	0	0	0	0	0	0	0	0	0	0	0	0	0	0	0	0	0	0	0	0	0	0	0	0	0	0	0	0	0	0	0	0	0
ENSDARG00000011855	0	0	0	0	0	0	0	0	0	0	0	0	0	0	0	0	0	0	0	0	0	0	0	0	0	0	0	0	0	0	0	0	0	0	0	0	0	0	0	0	0	0	0	0	0	0	0	0	0
ENSDARG00000011863	0	0	0	0	0	0	0	0	0	0	0	0	0	0	0	0	0	1.00012209	0	0	0	0	0	0	0	0	0	0	0	0	0	0	0	0	0	0	0	0	0	1.00012209	0	0	0	0	0	0	0	0	0
ENSDARG00000011876	0	0	0	0	0	0	0	0	0	1.00012209	0	1.00012209	0	0	1.00012209	0	0	4.001954397	0	0	0	0	1.00012209	0	0	0	0	1.00012209	0	1.00012209	0	2.00048844	0	0	0	0	0	0	0	0	0	0	0	0	0	0	1.00012209	0	0
ENSDARG00000011879	0	0	0	0	0	0	0	0	0	0	0	0	0	0	0	0	0	0	0	0	0	0	0	0	0	0	0	0	0	0	0	0	0	0	0	0	0	0	0	0	0	0	0	0	0	0	0	0	0
ENSDARG00000011885	0	1.00012209	0	0	0	0	0	0	0	2.00048844	0	0	0	0	0	0	0	0	0	0	0	0	0	0	0	0	0	0	0	0	0	1.00012209	0	0	0	0	0	0	0	0	0	0	0	0	0	0	0	0	0
ENSDARG00000011886	0	0	0	0	0	0	0	0	0	0	0	0	0	0	0	0	0	0	0	0	0	0	0	0	0	0	0	0	0	0	0	0	0	0	0	0	0	0	0	0	0	0	0	0	0	0	0	0	0
ENSDARG00000011890	0	0	0	0	0	0	0	0	0	1.00012209	0	1.00012209	0	0	0	0	0	0	0	0	0	0	0	0	0	0	0	0	0	0	0	0	0	0	0	0	0	0	0	0	0	0	0	0	0	0	0	0	0
ENSDARG00000011897	1.00012209	0	0	0	0	1.00012209	1.00012209	1.00012209	0	0	0	0	0	0	1.00012209	0	1.00012209	4.001954397	1.00012209	0	0	0	1.00012209	0	0	0	0	0	0	0	1.00012209	0	2.00048844	0	1.00012209	0	3.00109917	0	0	0	0	0	0	0	0	0	2.00048844	0	0
ENSDARG00000011909	0	0	0	0	0	0	0	1.00012209	0	0	0	0	0	0	0	0	0	0	0	0	0	0	0	0	0	0	0	0	0	0	1.00012209	0	0	0	1.00012209	0	0	0	0	0	0	0	0	0	0	0	0	0	0
ENSDARG00000011921	0	0	0	1.00012209	0	0	0	0	0	2.00048844	0	0	0	0	0	0	0	4.001954397	0	0	0	0	0	0	1.00012209	0	0	0	0	0	0	0	0	0	0	0	0	0	0	0	0	0	0	0	0	0	0	0	0
ENSDARG00000011925	0	0	0	0	0	0	0	0	0	0	0	0	0	0	0	0	0	1.00012209	0	0	0	0	0	0	0	0	0	0	0	0	0	0	0	0	1.00012209	0	0	0	0	0	0	0	0	0	0	0	4.001954397	0	0
ENSDARG00000011926	0	0	0	0	0	0	0	0	0	0	0	0	0	0	0	0	0	0	0	0	0	0	0	0	0	0	0	0	0	0	0	0	0	0	0	0	0	0	0	0	0	0	0	0	0	0	0	0	0
ENSDARG00000011929	0	0	0	0	0	0	0	0	0	0	0	0	0	0	0	0	0	0	0	0	0	0	0	0	0	0	0	0	0	0	0	0	0	0	0	0	0	0	0	0	0	0	0	0	0	0	0	0	0
ENSDARG00000011931	0	0	0	0	0	0	0	0	0	0	0	0	0	0	0	0	0	4.001954397	0	0	0	0	0	0	0	0	0	0	0	0	0	0	0	0	0	0	0	0	0	0	0	0	0	0	0	0	0	0	0
ENSDARG00000011932	0	0	0	0	0	0	0	0	0	0	0	0	0	0	0	0	0	1.00012209	0	0	0	0	0	0	0	0	0	0	0	0	0	0	0	0	0	0	0	0	0	0	0	0	0	0	0	0	0	0	0
ENSDARG00000011934	2.00048844	0	0	0	0	0	0	5.003054244	0	4.001954397	0	0	0	0	0	0	0	3.00109917	0	0	1.00012209	0	1.00012209	0	0	0	0	0	0	0	0	0	1.00012209	0	1.00012209	2.00048844	0	0	0	0	0	0	0	0	0	0	3.00109917	0	0
ENSDARG00000011941	0	0	0	0	0	0	0	0	0	2.00048844	0	0	0	0	5.003054244	0	1.00012209	5.003054244	0	0	0	0	1.00012209	0	0	0	0	0	0	0	0	2.00048844	4.001954397	0	6.004398828	0	1.00012209	0	0	3.00109917	0	0	0	0	0	0	4.001954397	0	0
ENSDARG00000011945	0	0	0	0	0	0	0	0	0	0	0	0	0	0	0	0	0	0	0	0	0	0	0	0	0	0	0	0	0	0	0	0	0	0	0	0	0	0	0	0	0	0	0	0	0	0	1.00012209	0	0
ENSDARG00000011948	0	2.00048844	0	0	0	1.00012209	1.00012209	1.00012209	0	0	0	0	0	0	4.001954397	0	0	3.00109917	1.00012209	0	0	0	11.01479701	0	0	0	0	0	0	0	4.001954397	3.00109917	4.001954397	0	2.00048844	0	6.004398828	0	0	0	0	0	0	0	0	0	4.001954397	0	0
ENSDARG00000011956	0	0	0	0	0	0	0	0	0	0	0	0	0	0	0	0	0	0	0	0	0	0	0	0	0	0	0	0	0	0	0	0	0	0	0	0	0	0	0	0	0	0	0	0	0	0	0	0	0
ENSDARG00000011958	0	0	0	0	0	0	0	0	0	0	0	0	0	0	0	0	0	1.00012209	0	0	0	0	0	0	0	0	0	0	0	0	0	0	0	0	0	0	0	0	0	0	0	0	0	0	0	0	0	0	0
ENSDARG00000011961	0	0	0	0	0	0	0	0	0	0	0	0	0	0	0	0	0	1.00012209	0	0	0	0	0	0	0	0	0	0	0	0	0	0	0	0	0	0	0	0	0	0	0	0	0	0	0	0	0	0	0
ENSDARG00000011973	0	0	0	0	0	0	0	0	0	0	0	0	0	0	0	0	0	2.00048844	0	0	0	0	0	0	0	0	0	0	0	0	0	0	0	0	0	0	0	0	0	0	0	0	0	0	0	0	0	0	0
ENSDARG00000011983	0	0	0	0	0	0	0	0	0	0	0	0	0	0	0	0	0	0	0	0	0	0	0	0	0	0	0	0	0	0	0	0	0	0	0	0	0	0	0	0	0	0	0	0	0	0	0	0	0
ENSDARG00000011989	0	0	0	0	0	0	0	0	0	0	0	0	0	0	0	0	0	0	0	0	0	0	0	0	0	0	0	0	0	0	0	0	0	0	0	0	0	0	0	0	0	0	0	0	0	0	0	0	0
ENSDARG00000011999	0	0	0	0	0	0	0	1.00012209	0	0	0	0	0	0	0	0	0	0	0	0	0	0	0	0	0	0	0	0	0	0	0	0	0	0	0	0	0	0	0	0	0	0	0	0	0	0	0	0	0
ENSDARG00000012002	0	0	0	0	0	0	0	2.00048844	0	0	0	0	0	0	0	0	0	0	0	0	0	0	0	0	0	0	0	0	0	0	0	0	0	0	0	0	0	0	0	0	0	0	0	0	0	0	0	0	0
ENSDARG00000012005	0	0	0	0	0	0	0	0	0	0	0	0	0	0	0	0	0	0	0	0	0	0	0	0	0	0	0	0	0	0	1.00012209	1.00012209	0	0	0	0	0	0	0	0	0	0	0	0	0	0	0	0	0
ENSDARG00000012016	0	0	0	0	0	0	0	0	0	0	0	1.00012209	0	0	0	0	0	0	0	0	0	0	0	0	0	0	0	0	0	0	0	0	1.00012209	0	1.00012209	0	0	0	0	0	0	0	0	0	0	0	0	0	0
ENSDARG00000012021	0	0	0	0	0	0	0	0	0	1.00012209	0	1.00012209	0	0	3.00109917	0	0	0	1.00012209	0	0	0	0	0	0	0	0	0	0	0	0	0	0	0	0	0	0	0	0	0	0	0	0	0	0	0	3.00109917	0	0
ENSDARG00000012025	0	0	0	0	0	0	0	1.00012209	0	0	0	0	0	0	0	0	0	1.00012209	0	0	0	0	0	0	0	0	0	0	0	0	0	0	0	0	0	0	0	0	0	0	0	0	0	0	0	0	0	0	0
ENSDARG00000012035	0	0	0	0	0	0	0	0	0	1.00012209	0	0	0	0	0	0	0	1.00012209	0	0	0	0	0	0	0	0	0	0	0	0	0	0	0	0	0	0	0	0	0	0	0	0	0	0	0	0	0	0	0
ENSDARG00000012039	0	0	0	0	0	0	0	1.00012209	0	0	0	0	0	0	0	0	0	0	0	0	0	0	0	0	2.00048844	0	0	0	0	0	0	0	0	0	0	0	0	0	0	0	0	0	0	0	0	0	0	0	0
ENSDARG00000012040	0	0	1.00012209	0	0	0	0	1.00012209	0	0	0	0	0	0	0	0	0	1.00012209	0	0	0	0	0	0	0	0	0	0	0	0	0	3.00109917	0	0	0	0	0	0	0	0	0	0	0	0	0	0	2.00048844	0	0
ENSDARG00000012044	0	0	0	0	0	0	0	0	0	0	0	0	0	0	0	0	0	0	0	0	0	0	0	0	0	0	0	0	0	0	0	0	0	0	0	0	0	0	0	0	0	0	0	0	0	0	0	0	0
ENSDARG00000012051	0	0	0	0	0	0	0	0	0	0	0	0	0	0	0	0	0	0	0	0	0	0	0	0	0	0	0	0	0	0	0	0	1.00012209	0	0	0	0	0	0	0	0	0	0	0	0	0	0	0	0
ENSDARG00000012060	0	0	0	0	0	0	0	0	0	0	0	0	0	0	0	0	0	0	0	0	0	0	1.00012209	0	0	0	0	0	0	0	0	0	0	0	0	0	0	0	0	0	0	0	0	0	0	0	0	0	0
ENSDARG00000012066	0	1.00012209	0	0	0	0	1.00012209	0	0	0	0	1.00012209	0	0	1.00012209	0	0	113.5597487	1.00012209	0	0	0	3.00109917	0	0	0	0	0	0	0	0	1.00012209	0	0	2.00048844	0	0	0	0	48.28346676	0	0	0	0	0	1.00012209	4.001954397	0	0
ENSDARG00000012071	0	0	0	0	0	0	0	0	0	0	0	0	0	0	0	0	0	4.001954397	0	0	0	0	0	0	0	0	0	0	0	0	0	0	0	0	0	0	0	0	0	0	0	0	0	0	0	0	1.00012209	0	0
ENSDARG00000012072	0	0	1.00012209	0	0	0	0	1.00012209	0	0	0	0	0	0	0	0	0	2.00048844	0	0	0	0	0	0	0	0	0	0	0	0	0	0	0	0	0	0	0	0	0	0	0	0	0	0	0	0	0	0	0
ENSDARG00000012078	1.00012209	0	0	0	0	0	0	0	0	2.00048844	0	2.00048844	1.00012209	0	0	0	0	11.01479701	3.00109917	0	0	0	0	0	0	0	0	0	0	0	2.00048844	4.001954397	1.00012209	0	1.00012209	0	0	0	0	0	0	1.00012209	0	0	0	0	11.01479701	0	0
ENSDARG00000012081	0	0	0	0	0	0	0	0	0	0	0	0	0	0	0	0	0	0	0	0	0	0	1.00012209	0	0	0	0	0	0	0	1.00012209	0	0	0	0	0	0	0	0	0	0	0	0	0	0	0	0	0	0
ENSDARG00000012094	0	0	0	0	0	0	0	0	0	1.00012209	0	0	0	0	0	0	0	0	0	0	0	0	0	0	0	0	0	0	0	0	0	0	0	0	1.00012209	0	0	0	0	0	0	0	0	0	0	0	0	0	0
ENSDARG00000012113	0	0	0	0	0	0	0	0	0	0	0	0	0	0	0	0	0	0	0	0	0	0	1.00012209	0	0	0	0	0	0	0	0	0	0	0	0	0	0	0	0	1.00012209	0	0	0	0	0	0	0	0	0
ENSDARG00000012130	0	0	0	0	0	0	0	2.00048844	0	3.00109917	0	1.00012209	0	1.00012209	0	0	1.00012209	0	1.00012209	0	0	0	5.003054244	0	2.00048844	0	0	0	0	0	3.00109917	0	1.00012209	0	1.00012209	0	0	0	0	1.00012209	0	0	0	0	0	0	4.001954397	0	0
ENSDARG00000012135	0	0	0	0	0	0	0	0	0	0	0	0	0	0	0	0	0	0	0	0	0	0	0	0	0	0	0	0	0	0	0	0	0	0	1.00012209	0	0	0	0	0	0	0	0	0	0	0	0	0	0
ENSDARG00000012137	0	0	0	0	0	0	0	0	0	0	0	0	0	0	0	0	0	0	0	0	0	0	0	0	0	0	0	0	0	0	0	0	0	0	0	0	0	0	0	0	0	0	0	0	0	0	0	0	0
ENSDARG00000012138	0	0	0	0	0	0	0	1.00012209	0	1.00012209	0	0	0	0	0	0	0	5.003054244	3.00109917	0	0	0	3.00109917	0	1.00012209	0	0	0	0	1.00012209	0	0	1.00012209	0	0	0	0	0	0	2.00048844	0	0	0	0	0	0	2.00048844	0	0
ENSDARG00000012140	0	0	0	0	0	0	0	2.00048844	0	1.00012209	0	2.00048844	0	0	0	0	0	2.00048844	0	0	0	0	0	0	0	0	0	0	0	0	0	0	0	0	1.00012209	0	0	0	0	0	0	0	0	0	0	0	4.001954397	0	0
ENSDARG00000012141	0	0	0	0	0	0	1.00012209	0	0	4.001954397	0	0	0	0	0	0	0	0	1.00012209	0	0	0	0	0	0	0	0	0	0	0	0	0	0	0	1.00012209	0	1.00012209	0	0	1.00012209	0	0	0	0	0	0	1.00012209	0	0
ENSDARG00000012144	2.00048844	0	0	0	0	0	0	1.00012209	0	2.00048844	0	0	0	0	2.00048844	0	0	0	1.00012209	0	0	2.00048844	0	0	0	0	0	0	0	0	0	1.00012209	0	0	2.00048844	0	0	0	0	0	0	0	0	0	0	0	2.00048844	0	0
ENSDARG00000012177	0	1.00012209	0	0	0	0	0	0	0	0	0	0	0	0	0	0	0	3.00109917	0	0	0	0	0	0	0	0	0	0	0	0	1.00012209	0	1.00012209	0	0	0	0	0	0	0	0	1.00012209	0	0	0	0	1.00012209	0	0
ENSDARG00000012187	0	0	0	1.00012209	0	0	0	0	0	0	0	0	0	0	0	0	0	6.004398828	2.00048844	0	0	0	0	0	0	0	0	0	0	0	2.00048844	0	0	0	0	0	0	0	0	0	0	0	0	0	0	0	0	0	0
ENSDARG00000012192	0	0	0	0	0	0	0	0	0	0	0	0	0	0	1.00012209	0	0	2.00048844	0	0	0	0	1.00012209	0	0	0	0	0	0	0	0	0	0	0	0	0	0	0	0	0	0	0	0	0	0	0	0	0	0
ENSDARG00000012194	0	0	0	0	0	0	0	0	0	2.00048844	0	0	0	0	0	0	0	1.00012209	0	0	0	0	0	0	0	0	0	0	0	0	0	0	0	0	0	0	0	0	0	0	0	0	0	0	0	0	0	0	0
ENSDARG00000012196	0	0	0	0	0	0	0	0	0	0	0	0	0	0	0	0	0	0	0	0	0	0	0	0	0	0	0	0	0	0	0	0	0	0	1.00012209	0	0	0	0	0	0	0	0	0	0	0	0	0	0
ENSDARG00000012199	0	0	0	0	0	0	0	0	0	0	0	0	0	0	0	0	0	1.00012209	0	0	0	0	0	0	0	0	0	0	0	0	0	0	0	0	0	0	0	0	0	0	0	0	0	0	0	0	0	0	0
ENSDARG00000012203	0	0	0	0	0	0	0	0	0	1.00012209	0	0	0	0	0	0	0	0	0	0	0	0	0	0	0	0	0	0	0	0	0	0	0	0	0	0	0	0	0	0	0	0	0	0	0	0	0	0	0
ENSDARG00000012204	0	0	0	0	0	0	0	0	0	0	0	0	0	0	0	0	0	0	0	0	0	0	0	0	0	0	0	0	0	0	0	0	0	0	0	0	0	0	0	0	0	0	0	0	0	0	0	0	0
ENSDARG00000012215	0	0	0	0	0	0	0	0	0	0	0	0	0	0	0	0	0	0	0	0	0	0	0	0	0	0	0	0	0	0	0	0	0	0	0	0	0	0	0	0	0	0	0	0	0	0	0	0	0
ENSDARG00000012219	0	0	0	0	0	0	0	0	0	0	0	0	0	0	0	0	0	0	0	0	0	0	0	0	0	0	0	0	0	0	0	0	0	0	0	0	0	0	0	0	0	0	0	0	0	0	0	0	0
ENSDARG00000012222	0	0	0	0	0	0	0	0	0	0	0	0	0	0	0	0	0	0	0	0	0	0	0	0	0	0	0	0	0	0	0	0	0	0	0	0	0	0	0	0	0	0	0	0	0	0	0	0	0
ENSDARG00000012234	0	0	0	0	0	0	0	0	0	0	0	0	0	0	0	0	0	0	0	0	0	0	1.00012209	0	0	0	0	0	0	0	0	0	0	0	0	0	0	0	0	0	0	0	0	0	0	0	0	0	0
ENSDARG00000012244	2.00048844	0	1.00012209	0	0	0	0	0	0	27.08938227	0	0	0	0	3.00109917	0	0	6.004398828	2.00048844	0	0	2.00048844	7.005988269	0	0	0	0	0	0	0	0	0	1.00012209	1.00012209	0	1.00012209	0	0	0	0	0	0	0	0	0	0	21.05401772	0	0
ENSDARG00000012247	0	0	0	0	0	0	0	0	0	0	0	0	0	0	0	0	0	0	0	0	0	0	0	0	0	0	0	0	0	0	0	0	0	0	0	0	0	0	0	0	0	0	0	0	0	0	0	0	0
ENSDARG00000012248	0	0	1.00012209	0	0	0	0	0	0	0	0	0	0	0	0	0	0	0	2.00048844	0	0	0	0	0	0	0	0	0	0	0	0	0	0	0	0	1.00012209	0	0	0	0	0	0	0	0	0	0	0	0	0
ENSDARG00000012249	0	0	0	0	0	0	0	0	0	0	0	0	0	0	0	0	0	0	0	0	0	0	0	0	0	0	0	0	0	0	0	0	0	0	0	0	0	0	0	0	0	0	0	0	0	0	0	0	0
ENSDARG00000012256	0	1.00012209	1.00012209	0	0	0	0	6.004398828	1.00012209	0	0	2.00048844	0	0	0	0	0	6.004398828	3.00109917	0	0	1.00012209	5.003054244	0	1.00012209	0	0	0	0	0	1.00012209	0	0	0	0	0	2.00048844	0	0	2.00048844	0	0	0	0	0	0	4.001954397	0	0
ENSDARG00000012261	0	0	0	0	0	0	0	0	0	0	0	2.00048844	0	0	0	0	0	1.00012209	0	0	0	0	0	0	0	0	0	0	0	0	1.00012209	0	0	0	0	0	0	0	0	0	0	0	0	0	0	0	2.00048844	0	0
ENSDARG00000012271	0	0	0	0	0	0	0	3.00109917	0	0	0	1.00012209	0	0	0	0	0	0	0	0	0	0	0	0	0	0	0	0	0	0	0	1.00012209	0	0	1.00012209	0	0	0	0	0	0	0	0	0	0	0	0	0	0
ENSDARG00000012274	0	0	0	0	0	0	0	0	0	0	0	0	0	0	0	0	0	2.00048844	0	0	0	0	2.00048844	0	0	0	0	0	0	0	0	0	0	0	0	0	0	0	0	0	0	0	0	0	0	0	2.00048844	0	0
ENSDARG00000012294	0	0	0	0	0	0	0	0	0	1.00012209	0	0	0	0	0	0	0	0	1.00012209	0	0	2.00048844	0	0	0	0	0	0	0	0	0	0	1.00012209	0	0	0	0	0	0	0	0	0	0	0	0	0	0	0	0
ENSDARG00000012295	0	0	0	0	0	0	0	0	0	0	0	0	0	0	0	0	0	2.00048844	0	0	0	0	0	0	0	0	0	0	0	0	0	0	0	0	0	0	0	0	0	0	0	0	0	0	0	0	0	0	0
ENSDARG00000012306	0	0	0	0	0	0	0	0	0	0	0	0	0	0	0	0	0	0	0	0	0	0	0	0	3.00109917	0	0	0	0	0	0	0	0	0	0	0	1.00012209	0	0	0	0	3.00109917	0	0	0	0	0	0	0
ENSDARG00000012311	0	0	0	0	0	0	0	0	0	0	0	0	0	0	0	0	0	0	0	0	0	0	0	0	0	0	0	0	0	0	0	0	0	0	0	0	0	0	0	0	0	0	0	0	0	0	0	0	0
ENSDARG00000012314	0	0	0	0	0	0	0	0	0	0	0	0	0	0	0	0	0	0	0	0	0	0	0	0	0	0	0	0	0	0	0	0	0	0	1.00012209	0	0	0	0	0	0	0	0	0	0	0	0	0	0
ENSDARG00000012336	0	0	0	0	0	0	0	0	0	0	0	0	0	0	0	0	0	0	0	0	0	0	1.00012209	0	0	0	0	0	0	0	0	0	0	0	0	0	0	0	0	0	0	0	0	0	0	0	0	0	0
ENSDARG00000012340	0	0	0	0	0	0	0	0	0	0	0	0	0	0	0	0	0	0	0	0	0	0	5.003054244	0	0	0	0	0	0	0	0	0	0	0	0	0	0	0	0	1.00012209	0	1.00012209	0	0	0	0	14.02398044	0	0
ENSDARG00000012353	0	0	0	0	0	0	0	0	0	1.00012209	0	0	0	0	0	0	0	3.00109917	0	0	0	0	0	0	0	0	0	0	0	0	0	0	1.00012209	0	0	0	0	0	0	0	0	0	0	0	0	0	0	0	0
ENSDARG00000012368	0	0	0	0	0	0	0	0	0	0	0	0	0	0	0	0	0	0	0	0	0	0	0	0	0	0	0	0	0	0	0	0	0	0	0	0	0	0	0	0	0	0	0	0	0	0	1.00012209	0	0
ENSDARG00000012369	0	0	0	0	0	0	0	1.00012209	0	1.00012209	0	0	0	0	0	0	0	3.00109917	0	0	0	0	0	0	0	0	0	0	0	0	0	0	0	0	0	0	2.00048844	0	0	0	0	0	0	0	0	0	1.00012209	0	0
ENSDARG00000012378	1.00012209	0	0	0	0	0	0	0	0	0	0	0	0	0	0	0	0	3.00109917	0	0	0	0	0	0	0	0	0	0	0	0	0	0	0	0	0	0	0	0	0	0	0	0	0	0	0	0	3.00109917	0	0
ENSDARG00000012381	0	0	0	0	0	0	0	0	0	28.09614152	0	0	1.00012209	0	0	4.001954397	0	0	0	0	0	1.00012209	0	0	0	0	0	0	0	1.00012209	1.00012209	0	0	1.00012209	0	1.00012209	0	0	0	0	0	0	0	1.00012209	0	0	1.00012209	0	0
ENSDARG00000012387	0	0	0	0	0	0	0	1.00012209	0	19.04420413	0	0	0	0	0	0	0	2.00048844	3.00109917	0	0	0	3.00109917	0	0	0	0	0	0	0	0	1.00012209	0	0	0	0	1.00012209	1.00012209	0	0	0	1.00012209	0	1.00012209	0	0	3.00109917	1.00012209	0
ENSDARG00000012388	1.00012209	2.00048844	0	0	0	2.00048844	0	1.00012209	0	35.15039348	0	1.00012209	3.00109917	0	1.00012209	0	0	1.00012209	5.003054244	0	0	2.00048844	4.001954397	0	11.01479701	3.00109917	0	0	0	2.00048844	0	3.00109917	0	6.004398828	1.00012209	2.00048844	0	0	0	2.00048844	0	5.003054244	0	7.005988269	0	0	12.01761253	0	0
ENSDARG00000012389	0	0	0	0	0	1.00012209	0	0	0	0	0	0	0	0	0	0	0	0	0	0	0	0	0	0	0	0	0	0	0	0	0	0	0	0	0	0	0	0	0	0	0	0	0	0	0	0	1.00012209	0	0
ENSDARG00000012395	0	0	0	0	0	0	0	0	0	0	0	0	0	0	0	0	0	0	0	0	0	0	0	0	0	0	0	0	0	0	0	0	0	0	0	0	0	0	0	0	0	0	0	0	0	0	0	0	0
ENSDARG00000012397	0	0	0	0	0	0	0	0	0	0	0	0	0	0	0	0	0	0	0	0	0	0	0	0	0	0	0	0	0	0	0	0	0	0	0	0	0	0	0	0	0	0	0	0	0	0	0	0	0
ENSDARG00000012399	0	0	0	0	0	0	0	3.00109917	0	0	0	0	0	0	0	0	0	2.00048844	0	0	0	0	0	0	2.00048844	0	0	0	0	0	2.00048844	0	2.00048844	0	0	0	0	0	0	0	0	0	2.00048844	0	0	0	1.00012209	0	0
ENSDARG00000012403	0	0	0	0	0	0	0	0	0	4.001954397	0	0	0	0	0	0	0	0	1.00012209	0	0	0	0	0	0	0	0	0	0	0	0	0	0	0	0	0	0	0	0	0	0	0	0	0	0	0	0	0	0
ENSDARG00000012405	0	4.001954397	1.00012209	0	0	0	1.00012209	0	0	0	0	0	0	0	1.00012209	0	1.00012209	249.4436055	9.009902203	0	0	0	13.02067364	0	0	0	0	0	0	0	0	2.00048844	0	0	1.00012209	1.00012209	0	0	0	9.009902203	0	0	1.00012209	1.00012209	0	0	10.01222694	0	0
ENSDARG00000012407	1.00012209	0	0	0	0	0	0	0	0	0	0	0	0	0	0	0	0	1.00012209	0	0	0	0	0	0	0	0	0	0	0	0	0	1.00012209	0	0	0	0	1.00012209	0	0	0	0	0	0	0	0	0	2.00048844	0	0
ENSDARG00000012409	0	0	0	0	0	0	0	0	0	13.02067364	0	1.00012209	0	0	0	1.00012209	0	0	0	0	0	0	1.00012209	0	4.001954397	2.00048844	0	0	0	0	0	0	0	1.00012209	0	0	0	0	0	0	0	1.00012209	0	0	0	0	0	0	0
ENSDARG00000012426	0	0	0	0	0	0	0	0	0	0	0	0	0	0	0	0	0	0	0	0	0	0	0	0	0	0	0	0	0	0	0	0	0	0	0	0	0	0	0	0	0	0	0	0	0	0	0	0	0
ENSDARG00000012432	1.00012209	0	0	0	0	0	0	2.00048844	0	1.00012209	0	0	0	0	0	0	0	0	0	0	0	0	3.00109917	0	0	0	0	0	0	0	0	1.00012209	0	1.00012209	0	0	0	0	0	0	0	0	0	0	0	0	2.00048844	0	0
ENSDARG00000012446	0	0	0	0	0	0	0	0	0	0	0	0	0	0	0	0	0	0	0	0	0	0	0	0	0	0	0	0	0	0	0	0	0	0	0	0	0	0	0	0	0	0	0	0	0	0	0	0	0
ENSDARG00000012449	0	0	0	0	0	0	0	0	0	0	0	0	0	0	0	0	0	0	0	0	0	0	0	0	0	0	0	0	0	0	0	0	0	1.00012209	0	0	0	0	0	0	0	0	0	0	0	0	0	0	0
ENSDARG00000012450	0	0	0	0	0	0	0	5.003054244	0	0	0	0	0	0	1.00012209	0	0	5.003054244	0	0	0	0	0	0	0	0	0	0	0	0	0	0	0	0	0	0	0	0	0	0	0	0	0	0	0	0	3.00109917	0	0
ENSDARG00000012453	0	0	0	0	0	0	0	0	0	1.00012209	0	0	0	0	0	0	0	0	0	0	0	0	0	0	0	0	0	0	0	0	0	0	0	0	0	0	0	0	0	0	0	0	0	0	0	0	0	0	0
ENSDARG00000012458	2.00048844	0	0	0	0	0	0	4.001954397	0	1.00012209	0	0	0	0	1.00012209	0	0	3.00109917	0	0	0	0	1.00012209	0	1.00012209	0	0	0	0	0	1.00012209	0	2.00048844	2.00048844	2.00048844	0	0	0	0	2.00048844	0	1.00012209	0	0	0	1.00012209	3.00109917	0	0
ENSDARG00000012468	0	0	0	0	0	0	0	0	0	0	0	0	0	0	0	0	0	0	0	0	0	0	0	0	0	1.00012209	0	0	0	0	0	0	0	0	0	0	0	0	0	0	0	0	0	0	0	0	0	0	0
ENSDARG00000012482	0	0	0	0	0	0	0	0	0	0	0	0	0	0	0	0	0	0	0	0	0	0	0	0	0	0	0	0	0	0	0	0	0	0	0	0	0	0	0	0	0	0	0	0	0	0	0	0	0
ENSDARG00000012493	0	0	0	0	0	0	0	0	0	1.00012209	0	0	0	0	0	0	0	0	0	0	0	0	0	0	0	0	0	0	0	0	0	0	0	0	0	0	0	0	0	0	0	0	0	0	0	0	0	0	0
ENSDARG00000012495	0	0	0	0	0	0	0	0	0	0	0	0	0	0	0	0	0	2.00048844	0	0	0	0	0	0	0	0	0	0	0	0	0	0	0	0	0	0	0	0	0	0	0	0	0	0	0	0	3.00109917	0	0
ENSDARG00000012499	3.00109917	0	0	0	0	0	0	0	0	0	0	0	0	0	0	0	0	3.00109917	1.00012209	0	0	0	0	0	0	0	0	0	0	0	0	1.00012209	0	0	0	0	0	0	0	0	0	0	0	0	0	0	0	0	0
ENSDARG00000012505	0	0	0	0	0	0	0	0	0	0	0	0	0	0	0	0	0	0	0	0	0	0	0	0	0	0	0	0	0	0	0	0	0	1.00012209	1.00012209	0	0	0	0	0	0	0	0	0	0	0	0	0	0
ENSDARG00000012506	0	0	0	0	0	0	0	0	0	0	0	0	0	0	0	0	0	0	0	0	0	0	0	0	0	0	0	0	0	0	0	0	0	0	0	0	0	0	0	0	0	0	0	0	0	0	0	0	0
ENSDARG00000012513	11.01479701	0	1.00012209	0	0	1.00012209	1.00012209	18.03966704	0	8.007822687	0	4.001954397	0	0	5.003054244	0	0	27.08938227	5.003054244	0	0	0	15.02753306	0	0	3.00109917	0	0	0	0	2.00048844	13.02067364	2.00048844	2.00048844	8.007822687	1.00012209	5.003054244	0	1.00012209	4.001954397	0	0	0	0	0	0	47.27173401	0	0
ENSDARG00000012519	0	0	0	0	0	0	0	0	0	0	0	0	0	0	0	0	0	4.001954397	0	0	0	0	1.00012209	0	0	0	0	0	0	1.00012209	0	0	2.00048844	0	3.00109917	0	0	0	0	2.00048844	0	0	0	0	0	0	3.00109917	0	0
ENSDARG00000012524	0	0	0	0	0	0	0	1.00012209	0	0	0	0	0	0	0	0	0	1.00012209	0	0	0	0	0	0	0	0	0	0	0	0	0	0	0	0	0	0	0	0	0	0	0	0	0	0	0	0	0	0	0
ENSDARG00000012534	0	0	0	0	0	0	0	0	0	0	0	0	0	0	1.00012209	0	0	0	0	0	0	0	0	0	0	0	0	0	0	0	0	0	0	0	0	0	0	0	0	0	0	0	0	0	0	0	0	0	0
ENSDARG00000012535	0	0	0	0	0	0	0	0	0	0	0	0	0	0	0	0	0	0	0	0	0	0	0	0	0	0	0	0	0	0	0	0	0	0	0	0	0	0	0	0	0	0	0	0	0	0	0	0	0
ENSDARG00000012552	0	0	0	0	0	0	0	0	0	2.00048844	0	0	0	0	1.00012209	0	0	3.00109917	0	0	0	0	0	0	0	0	0	0	0	0	0	0	0	0	0	0	0	0	0	0	0	0	0	0	0	0	0	0	0
ENSDARG00000012553	0	0	0	0	0	0	0	1.00012209	0	0	0	0	0	0	0	0	0	2.00048844	0	0	0	0	0	0	0	0	0	0	0	0	0	0	0	0	1.00012209	0	0	0	0	0	0	0	0	0	0	0	2.00048844	0	0
ENSDARG00000012563	0	0	0	0	0	0	0	0	0	0	0	0	0	0	0	0	0	0	0	0	0	0	0	0	0	0	0	0	0	0	0	0	0	0	0	0	0	0	0	0	0	0	0	0	0	0	1.00012209	0	0
ENSDARG00000012572	0	0	0	0	0	0	0	0	0	0	0	0	0	0	0	0	0	0	0	0	0	0	0	0	0	0	0	0	0	0	2.00048844	0	0	0	0	0	0	0	0	0	0	0	0	0	0	0	2.00048844	0	0
ENSDARG00000012574	0	0	0	0	0	0	0	0	0	0	0	0	0	0	1.00012209	0	0	0	0	0	0	0	0	0	0	0	0	0	0	0	1.00012209	1.00012209	0	0	0	0	0	0	0	0	0	0	0	0	0	0	1.00012209	0	0
ENSDARG00000012577	0	0	0	0	0	0	0	1.00012209	0	0	0	0	0	0	0	0	0	0	1.00012209	0	0	0	0	0	0	0	0	0	0	0	0	0	0	0	0	0	0	0	0	0	0	0	0	0	0	0	1.00012209	0	0
ENSDARG00000012581	0	0	0	0	0	0	0	0	0	2.00048844	0	0	0	0	1.00012209	0	0	0	0	0	0	0	0	0	0	0	0	0	0	0	0	0	0	0	0	0	0	0	0	0	0	0	0	0	0	0	0	0	0
ENSDARG00000012586	0	0	0	0	0	0	1.00012209	0	0	0	0	0	0	0	1.00012209	0	0	1.00012209	3.00109917	0	0	0	0	0	0	0	0	0	0	0	1.00012209	0	0	0	1.00012209	0	0	0	0	2.00048844	0	1.00012209	0	0	0	0	4.001954397	0	0
ENSDARG00000012588	0	0	0	0	0	0	0	0	0	3.00109917	0	0	0	0	0	0	0	1.00012209	0	0	0	0	0	0	0	0	0	0	0	1.00012209	0	0	0	0	0	0	0	0	0	1.00012209	0	0	0	0	0	0	1.00012209	0	0
ENSDARG00000012591	1.00012209	0	0	0	0	0	0	0	0	0	0	0	0	0	2.00048844	0	0	3.00109917	0	0	0	2.00048844	0	0	0	0	0	0	0	0	0	0	0	0	1.00012209	0	0	0	0	0	0	0	0	0	0	0	4.001954397	0	0
ENSDARG00000012592	0	0	0	0	0	0	0	0	0	0	0	0	0	0	0	0	0	0	0	0	0	0	0	0	0	0	0	0	0	1.00012209	0	1.00012209	0	0	0	0	0	0	0	0	0	0	0	0	0	0	2.00048844	0	0
ENSDARG00000012593	1.00012209	1.00012209	1.00012209	1.00012209	0	0	0	0	0	0	0	1.00012209	1.00012209	0	0	0	2.00048844	190.3555123	1.00012209	0	0	0	7.005988269	0	0	0	0	0	0	0	0	5.003054244	3.00109917	0	1.00012209	0	0	0	1.00012209	4.001954397	1.00012209	0	0	0	0	0	9.009902203	0	0
ENSDARG00000012600	1.00012209	0	0	0	0	0	0	1.00012209	0	0	0	0	0	0	0	0	0	0	0	0	0	0	0	0	0	0	0	0	0	0	0	1.00012209	0	0	0	0	0	0	0	0	0	0	0	0	0	0	0	0	0
ENSDARG00000012603	0	0	0	0	0	0	0	1.00012209	0	0	0	0	0	0	0	0	0	6.004398828	0	0	0	0	2.00048844	0	0	0	0	0	0	0	1.00012209	0	0	0	2.00048844	0	0	0	0	0	0	1.00012209	0	0	0	0	7.005988269	0	0
ENSDARG00000012610	0	0	0	0	0	0	0	0	0	0	0	0	0	0	0	0	0	0	1.00012209	0	0	0	0	0	0	0	0	0	0	0	0	0	0	0	0	0	0	0	0	0	0	0	0	0	0	0	0	0	0
ENSDARG00000012625	0	0	0	0	0	0	0	0	0	2.00048844	0	0	0	0	0	0	0	1.00012209	0	0	0	0	0	0	1.00012209	0	0	0	0	0	0	0	0	0	0	0	0	0	0	0	0	3.00109917	0	0	0	0	2.00048844	0	0
ENSDARG00000012627	3.00109917	0	0	0	0	0	0	2.00048844	0	0	0	0	0	0	0	0	0	0	0	0	0	0	0	0	1.00012209	0	0	0	0	0	1.00012209	0	1.00012209	0	0	0	0	0	0	0	0	0	0	0	0	0	2.00048844	0	0
ENSDARG00000012642	0	0	0	0	0	0	2.00048844	0	0	0	0	0	0	0	0	0	0	1.00012209	0	0	0	0	0	0	0	1.00012209	0	0	0	0	1.00012209	0	0	0	0	0	0	0	0	0	0	0	0	0	0	0	0	0	0
ENSDARG00000012656	0	0	0	0	0	0	0	4.001954397	0	0	0	0	0	0	0	1.00012209	0	5.003054244	0	0	0	0	0	0	1.00012209	0	0	0	0	0	0	0	1.00012209	0	1.00012209	0	0	0	0	4.001954397	0	0	0	0	0	0	6.004398828	0	0
ENSDARG00000012671	0	0	0	0	0	0	0	0	0	0	0	0	0	1.00012209	0	0	0	0	0	0	0	0	0	0	0	0	0	0	0	0	1.00012209	0	0	0	0	0	0	0	0	0	0	0	0	0	0	0	1.00012209	0	0
ENSDARG00000012672	0	0	0	0	0	0	0	1.00012209	0	2.00048844	0	0	0	0	0	0	0	1.00012209	0	0	0	0	0	0	0	0	0	0	0	0	0	0	0	0	1.00012209	0	0	0	0	0	0	0	0	0	0	0	0	0	0
ENSDARG00000012674	0	0	0	0	0	0	0	0	0	2.00048844	0	0	0	0	0	0	0	3.00109917	0	0	0	0	2.00048844	0	0	0	0	0	0	0	0	0	0	0	0	0	0	0	0	0	0	0	0	0	0	0	9.009902203	0	0
ENSDARG00000012682	1.00012209	1.00012209	0	1.00012209	0	1.00012209	2.00048844	1.00012209	0	6.004398828	0	1.00012209	0	0	1.00012209	0	0	23.06481795	3.00109917	0	0	0	12.01761253	0	0	0	0	0	0	0	1.00012209	2.00048844	4.001954397	1.00012209	1.00012209	1.00012209	1.00012209	0	0	3.00109917	0	0	0	0	0	0	15.02753306	0	0
ENSDARG00000012684	0	0	0	0	0	0	0	0	0	1.00012209	0	0	0	0	0	0	0	1.00012209	1.00012209	0	0	0	2.00048844	0	0	0	0	0	0	0	0	0	0	0	0	0	0	0	0	0	0	0	0	0	0	0	4.001954397	0	0
ENSDARG00000012688	3.00109917	0	2.00048844	0	0	0	1.00012209	13.02067364	0	45.24901792	0	11.01479701	0	1.00012209	3.00109917	0	0	24.07058837	10.01222694	0	0	1.00012209	12.01761253	1.00012209	9.009902203	1.00012209	0	0	0	0	10.01222694	8.007822687	1.00012209	2.00048844	1.00012209	0	7.005988269	0	0	6.004398828	0	0	1.00012209	1.00012209	0	0	26.08287041	0	0
ENSDARG00000012699	0	0	0	0	0	0	0	0	0	0	0	0	0	0	0	0	0	0	0	0	0	0	0	0	0	0	0	0	0	0	0	0	0	0	0	0	0	0	0	0	0	0	0	0	0	0	0	0	0
ENSDARG00000012709	0	1.00012209	0	0	0	0	0	0	0	3.00109917	0	0	2.00048844	0	0	0	0	1.00012209	0	0	0	0	1.00012209	0	0	0	0	0	0	1.00012209	0	1.00012209	0	0	0	0	0	0	0	0	0	0	0	0	0	0	2.00048844	0	0
ENSDARG00000012718	1.00012209	0	0	0	0	0	0	0	0	0	0	0	0	0	0	0	0	0	0	0	0	0	0	0	0	0	0	0	0	0	0	0	0	0	0	0	0	0	0	0	0	0	0	0	0	0	0	0	0
ENSDARG00000012723	0	0	0	0	0	0	0	0	1.00012209	0	0	0	0	0	1.00012209	0	0	1.00012209	2.00048844	0	0	0	2.00048844	0	0	0	0	0	0	0	0	1.00012209	2.00048844	0	1.00012209	0	0	0	0	1.00012209	0	0	0	0	0	0	2.00048844	0	0
ENSDARG00000012726	0	0	0	0	0	0	0	0	0	0	0	0	0	0	2.00048844	0	0	1.00012209	0	0	0	0	0	0	0	0	0	0	0	0	0	0	0	0	0	0	0	0	0	0	0	0	0	0	0	0	0	0	0
ENSDARG00000012729	0	1.00012209	0	0	0	0	1.00012209	6.004398828	0	0	0	0	0	0	0	0	0	0	0	0	0	0	1.00012209	0	0	1.00012209	0	0	0	0	0	0	0	0	0	0	0	0	1.00012209	0	0	0	0	0	0	0	0	0	0
ENSDARG00000012738	0	0	0	0	0	0	0	0	0	0	0	0	0	0	0	0	0	0	0	0	0	0	0	0	0	0	0	0	0	0	0	0	0	0	0	0	0	0	0	0	0	0	0	0	0	0	0	0	0
ENSDARG00000012741	1.00012209	0	0	0	0	0	0	0	0	2.00048844	0	0	0	0	1.00012209	0	0	0	0	0	0	0	0	0	0	0	0	0	0	0	0	0	0	0	0	0	0	0	0	0	0	0	0	0	0	0	0	0	0
ENSDARG00000012745	0	0	0	0	0	0	0	0	0	0	0	0	0	0	0	0	0	4.001954397	0	0	0	0	0	0	0	0	0	0	0	0	0	0	0	0	0	0	0	0	0	1.00012209	0	0	0	0	0	0	0	0	0
ENSDARG00000012747	0	0	1.00012209	0	0	0	0	0	0	2.00048844	0	1.00012209	0	0	0	0	0	2.00048844	0	0	0	0	0	0	0	0	0	0	0	0	0	0	1.00012209	0	2.00048844	0	0	0	0	1.00012209	0	0	0	0	0	0	6.004398828	0	0
ENSDARG00000012763	0	0	0	0	0	0	0	0	0	0	0	0	0	0	0	0	0	1.00012209	0	0	0	0	1.00012209	0	0	0	0	0	0	0	0	0	0	0	0	0	0	0	0	0	0	0	0	0	0	0	1.00012209	0	0
ENSDARG00000012776	0	0	0	0	0	0	3.00109917	0	0	0	0	0	0	0	0	0	0	0	1.00012209	0	0	0	0	0	0	0	0	0	0	0	0	1.00012209	0	0	0	0	0	0	0	0	0	0	0	0	0	0	1.00012209	0	0
ENSDARG00000012777	0	0	0	0	0	0	0	0	0	1.00012209	0	2.00048844	0	0	0	0	0	5.003054244	3.00109917	0	0	0	2.00048844	0	0	0	0	0	0	0	3.00109917	0	1.00012209	2.00048844	1.00012209	0	0	0	0	0	0	0	0	0	0	0	0	0	0
ENSDARG00000012790	0	0	0	0	0	0	0	0	0	0	0	0	0	0	0	0	0	0	0	0	0	0	0	0	0	0	0	0	0	0	0	0	0	0	0	0	0	0	0	0	0	0	0	0	0	0	0	0	0
ENSDARG00000012801	0	0	0	0	0	0	0	0	0	4.001954397	0	0	0	0	0	0	0	0	0	0	0	0	0	0	0	0	0	0	0	0	0	0	0	2.00048844	0	0	0	0	0	0	0	1.00012209	0	0	0	0	3.00109917	0	0
ENSDARG00000012816	0	0	0	0	0	0	0	0	0	0	0	0	0	0	0	0	0	0	0	0	0	0	0	0	0	0	0	0	0	0	0	0	0	0	0	0	0	0	0	0	0	0	0	0	0	0	0	0	0
ENSDARG00000012818	0	0	0	0	0	0	0	0	0	0	0	0	0	0	0	0	0	0	0	0	0	1.00012209	0	0	0	0	0	0	0	0	0	0	1.00012209	0	0	0	0	0	0	0	0	0	0	0	0	0	0	0	0
ENSDARG00000012820	6.004398828	1.00012209	0	0	0	0	0	5.003054244	0	2.00048844	0	1.00012209	0	0	0	0	0	14.02398044	4.001954397	0	0	0	4.001954397	0	1.00012209	0	0	0	0	0	0	1.00012209	0	0	3.00109917	0	7.005988269	0	0	4.001954397	0	0	0	0	0	0	12.01761253	1.00012209	0
ENSDARG00000012823	0	0	0	0	0	0	0	0	0	0	0	0	0	0	0	0	0	1.00012209	0	0	0	0	0	0	0	0	0	0	0	0	0	0	0	0	0	0	0	0	0	0	0	0	0	0	0	0	0	0	0
ENSDARG00000012824	0	0	0	0	0	0	0	0	0	0	0	0	0	0	0	0	0	0	0	0	0	0	0	0	0	0	0	0	0	2.00048844	0	0	0	0	0	0	0	0	0	0	0	2.00048844	0	0	0	0	0	0	0
ENSDARG00000012827	0	0	0	0	0	0	0	0	0	0	0	1.00012209	0	0	0	0	0	1.00012209	0	0	0	0	0	0	0	0	0	0	0	0	0	0	0	0	0	0	0	0	0	0	0	0	0	0	0	0	0	0	0
ENSDARG00000012829	0	0	0	0	0	0	0	0	0	0	0	0	0	0	0	0	0	0	0	0	0	0	0	0	0	0	0	0	0	0	0	0	0	0	0	0	0	0	0	0	0	0	0	0	0	0	0	0	0
ENSDARG00000012833	0	0	0	0	0	0	0	0	0	0	0	0	0	0	1.00012209	0	0	0	0	0	0	0	1.00012209	0	0	0	0	0	0	0	0	1.00012209	0	0	0	0	0	0	0	0	0	0	0	0	0	0	0	0	0
ENSDARG00000012840	0	0	0	0	0	0	0	0	0	0	0	0	0	0	0	0	0	0	0	0	0	0	1.00012209	0	0	0	0	0	0	0	0	1.00012209	0	0	0	0	0	0	0	0	0	0	0	0	0	0	0	0	0
ENSDARG00000012848	1.00012209	0	0	0	0	0	0	2.00048844	0	2.00048844	0	0	0	0	0	0	0	2.00048844	0	0	0	0	0	0	0	0	0	0	0	0	0	0	0	0	0	0	0	0	0	0	0	0	0	0	0	0	2.00048844	0	0
ENSDARG00000012866	0	0	0	0	0	0	0	0	0	0	0	0	0	0	0	0	0	0	0	0	0	0	0	0	0	0	0	0	0	0	1.00012209	0	0	0	0	0	0	0	0	0	0	0	0	0	0	0	1.00012209	0	0
ENSDARG00000012871	0	0	0	0	0	0	0	0	0	0	0	0	0	0	0	0	0	3.00109917	1.00012209	0	0	0	0	0	0	0	0	0	0	0	0	0	0	0	3.00109917	0	0	0	0	0	0	0	0	0	0	0	2.00048844	0	0
ENSDARG00000012874	0	1.00012209	0	0	0	0	0	1.00012209	0	0	0	0	0	0	0	0	0	0	0	0	0	0	2.00048844	0	1.00012209	0	0	0	0	0	0	0	0	0	0	0	0	0	0	0	0	0	0	0	0	0	0	0	0
ENSDARG00000012881	0	0	0	0	0	0	0	0	0	0	0	0	0	0	0	0	0	0	0	0	0	0	0	0	0	0	0	0	0	0	0	0	0	0	0	0	0	0	0	0	0	0	0	0	0	0	0	0	0
ENSDARG00000012887	0	0	0	0	0	0	1.00012209	2.00048844	0	0	0	0	0	0	0	0	0	0	0	0	0	0	0	0	0	0	0	0	0	0	0	0	0	0	0	0	0	0	0	0	0	0	0	0	0	0	1.00012209	0	0
ENSDARG00000012892	0	0	0	0	0	0	1.00012209	2.00048844	0	1.00012209	0	0	0	0	3.00109917	0	0	14.02398044	1.00012209	0	0	0	3.00109917	0	0	0	0	0	0	0	2.00048844	0	0	0	0	0	1.00012209	0	0	0	0	0	0	0	0	0	0	1.00012209	0
ENSDARG00000012899	0	0	0	0	0	0	0	2.00048844	0	0	0	0	0	0	0	0	0	0	0	0	0	0	1.00012209	0	1.00012209	0	0	0	0	1.00012209	0	0	0	0	0	0	1.00012209	0	0	0	0	0	0	0	0	0	1.00012209	0	0
ENSDARG00000012914	0	0	0	0	0	0	0	0	0	7.005988269	0	0	0	0	0	0	0	2.00048844	0	0	0	0	0	0	3.00109917	0	0	0	0	0	0	0	0	1.00012209	0	0	0	0	0	0	0	2.00048844	0	1.00012209	0	0	0	0	0
ENSDARG00000012915	0	0	0	0	0	0	0	0	0	2.00048844	0	0	0	0	0	0	0	1.00012209	0	0	0	0	1.00012209	0	0	0	0	0	0	0	0	0	0	0	0	0	0	0	0	0	0	0	0	0	0	0	1.00012209	0	0
ENSDARG00000012927	0	0	0	0	0	0	0	0	0	0	0	0	0	0	0	0	0	1.00012209	0	0	0	0	1.00012209	0	0	0	0	0	0	0	0	0	0	0	0	0	0	0	0	0	0	0	0	0	0	0	1.00012209	0	0
ENSDARG00000012929	0	0	0	0	0	0	0	0	0	0	0	0	0	0	0	0	0	1.00012209	0	0	0	0	0	0	0	0	0	0	0	0	0	0	0	0	0	0	0	0	0	0	0	0	0	0	0	0	0	0	0
ENSDARG00000012932	0	0	0	0	0	1.00012209	1.00012209	0	0	2.00048844	0	0	0	0	0	0	0	0	0	0	0	0	1.00012209	0	1.00012209	0	0	0	0	0	0	0	0	1.00012209	0	0	0	0	0	0	0	0	0	0	0	0	2.00048844	0	0
ENSDARG00000012942	0	0	0	0	0	0	0	0	0	0	0	0	0	0	0	0	0	0	0	0	0	0	0	0	0	0	0	0	0	0	0	0	0	0	4.001954397	0	0	0	0	1.00012209	0	0	0	0	0	0	2.00048844	0	0
ENSDARG00000012944	0	0	0	0	0	0	0	0	0	0	0	0	0	0	0	0	0	0	0	0	0	0	0	0	0	0	0	0	0	0	0	0	0	0	0	0	0	0	0	0	0	0	0	0	0	0	0	0	0
ENSDARG00000012945	0	0	0	0	0	0	0	0	0	0	0	0	0	0	0	0	0	0	0	0	0	0	0	0	0	0	0	0	0	0	0	0	0	0	0	0	0	0	0	0	0	0	0	0	0	0	0	0	0
ENSDARG00000012946	1.00012209	0	0	0	1.00012209	0	2.00048844	0	0	1.00012209	0	0	0	0	0	0	0	1.00012209	0	0	0	0	2.00048844	0	0	0	0	0	0	0	1.00012209	0	2.00048844	1.00012209	1.00012209	0	2.00048844	0	0	0	0	0	0	0	0	0	1.00012209	0	0
ENSDARG00000012947	0	0	0	0	0	0	0	0	0	2.00048844	0	0	0	0	0	0	0	0	0	0	0	0	1.00012209	0	0	0	0	0	0	0	0	4.001954397	0	0	0	0	0	0	0	2.00048844	0	0	0	0	0	0	0	0	0
ENSDARG00000012948	0	0	0	0	0	0	0	0	0	0	0	0	0	0	0	0	0	0	0	0	0	0	0	0	0	0	0	0	0	0	0	0	0	0	0	0	0	0	0	0	0	0	0	0	0	0	0	0	0
ENSDARG00000012949	0	0	0	0	0	0	0	0	0	0	0	0	0	0	0	0	0	1.00012209	0	0	0	0	0	0	0	0	0	0	0	0	0	0	0	0	0	0	0	0	0	0	0	0	0	0	0	0	0	0	0
ENSDARG00000012953	1.00012209	0	0	0	0	0	1.00012209	1.00012209	0	2.00048844	0	0	0	0	0	0	0	0	0	0	0	0	0	0	0	0	0	0	0	0	0	0	0	0	1.00012209	0	0	0	0	0	0	0	0	0	0	0	0	0	0
ENSDARG00000012982	0	0	0	0	0	0	0	0	0	0	0	0	0	0	1.00012209	0	0	0	0	0	0	0	0	0	0	0	0	0	0	0	1.00012209	0	0	0	0	0	0	0	0	0	0	0	0	0	0	0	0	0	0
ENSDARG00000012986	0	0	0	0	0	0	0	0	0	0	0	0	0	0	0	0	0	1.00012209	0	0	0	0	0	0	0	0	0	0	0	0	0	0	1.00012209	0	0	0	0	0	0	0	0	0	0	0	0	0	0	0	0
ENSDARG00000012987	0	0	0	0	0	2.00048844	0	5.003054244	0	3.00109917	0	0	1.00012209	0	0	0	0	9.009902203	0	0	0	0	8.007822687	1.00012209	1.00012209	0	0	0	0	0	1.00012209	0	0	1.00012209	4.001954397	0	0	0	0	0	0	0	0	0	0	0	34.14189908	0	0
ENSDARG00000012990	0	0	0	0	0	0	0	0	0	0	0	0	0	0	0	0	0	2.00048844	0	0	0	0	0	0	0	0	0	0	0	0	0	1.00012209	0	0	0	0	0	0	0	1.00012209	0	0	0	0	0	0	2.00048844	0	0
ENSDARG00000012995	0	0	0	0	0	0	0	0	0	0	0	0	0	0	0	0	0	2.00048844	0	0	0	0	0	0	0	0	0	0	0	0	1.00012209	0	0	0	0	0	0	0	0	0	0	0	0	0	0	0	0	0	0
ENSDARG00000013004	0	0	0	0	0	0	0	0	0	0	0	1.00012209	0	0	0	0	0	0	0	0	0	0	0	0	0	0	0	0	0	0	0	0	0	0	0	0	0	0	0	0	0	0	0	0	0	0	0	0	0
ENSDARG00000013006	0	0	0	0	0	0	0	0	0	0	0	0	0	0	0	0	0	0	0	0	0	0	0	0	0	0	0	0	0	0	0	0	0	0	0	0	0	0	0	0	0	0	0	0	0	0	0	0	0
ENSDARG00000013007	0	0	0	0	0	0	0	0	0	1.00012209	0	0	0	0	0	0	0	0	0	0	0	0	0	0	0	0	0	0	0	0	0	0	0	0	1.00012209	0	0	0	0	0	0	0	0	0	0	0	5.003054244	0	0
ENSDARG00000013009	2.00048844	0	0	0	0	0	0	1.00012209	0	1.00012209	0	0	0	0	0	0	0	0	0	0	0	0	0	0	0	0	0	0	0	0	0	1.00012209	0	0	0	0	0	0	0	0	0	0	0	0	0	0	0	0	0
ENSDARG00000013012	20.04898766	0	1.00012209	1.00012209	0	2.00048844	0	36.15913625	1.00012209	60.44379237	0	9.009902203	1.00012209	0	7.005988269	1.00012209	0	65.52126915	15.02753306	0	0	4.001954397	53.34588243	1.00012209	4.001954397	0	1.00012209	0	0	0	27.08938227	8.007822687	24.07058837	0	11.01479701	0	11.01479701	0	1.00012209	29.10314829	1.00012209	0	0	0	0	0	73.65834658	1.00012209	0
ENSDARG00000013015	0	0	0	0	0	0	0	0	0	3.00109917	0	0	0	0	0	0	0	0	0	0	0	0	0	0	0	0	0	0	0	0	0	0	0	0	0	0	0	0	0	0	0	0	0	0	0	0	0	0	0
ENSDARG00000013016	0	0	1.00012209	0	0	0	0	0	0	0	0	0	0	0	0	0	0	0	0	0	0	0	0	0	0	0	0	0	0	0	0	0	1.00012209	1.00012209	0	0	0	0	0	0	0	0	0	0	0	0	0	0	0
ENSDARG00000013020	0	1.00012209	0	0	0	0	1.00012209	0	0	1.00012209	0	0	0	0	1.00012209	0	0	1.00012209	0	0	0	0	3.00109917	0	0	0	0	0	0	0	0	0	0	0	2.00048844	1.00012209	3.00109917	0	0	0	0	0	0	0	0	0	13.02067364	0	0
ENSDARG00000013022	2.00048844	1.00012209	0	0	0	1.00012209	0	3.00109917	0	1.00012209	0	0	0	0	2.00048844	0	0	3.00109917	0	0	0	0	1.00012209	0	0	0	0	0	0	2.00048844	0	3.00109917	2.00048844	0	3.00109917	0	2.00048844	0	0	3.00109917	0	0	0	0	0	0	10.01222694	0	0
ENSDARG00000013024	0	0	0	0	0	0	0	0	0	0	0	0	0	0	0	0	0	0	0	0	0	0	0	0	0	0	0	0	0	0	0	0	0	0	0	0	0	0	0	0	0	0	0	0	0	0	0	0	0
ENSDARG00000013025	0	0	0	0	0	0	0	0	0	0	0	0	0	0	0	0	0	0	0	0	0	0	0	0	0	0	0	0	0	0	0	0	0	0	0	0	0	0	0	0	0	0	0	0	0	0	0	0	0
ENSDARG00000013031	0	0	0	0	0	0	0	0	0	0	0	0	0	0	0	0	0	3.00109917	0	0	0	0	0	0	0	0	0	0	0	0	1.00012209	0	0	0	0	0	0	0	0	0	0	0	0	0	0	0	1.00012209	0	0
ENSDARG00000013042	0	0	0	0	0	0	0	0	0	0	0	0	0	0	0	0	0	0	0	0	0	0	0	0	0	0	0	0	0	0	0	0	0	0	0	0	0	0	0	0	0	0	0	0	0	0	0	0	0
ENSDARG00000013044	0	1.00012209	0	0	0	1.00012209	0	3.00109917	1.00012209	9.009902203	0	2.00048844	0	0	0	0	0	0	0	0	0	0	2.00048844	0	2.00048844	0	0	0	0	0	0	0	0	0	0	0	0	0	0	2.00048844	0	0	0	0	0	0	0	0	0
ENSDARG00000013047	0	0	0	0	0	0	0	0	0	0	0	0	0	0	1.00012209	0	0	0	0	0	0	0	1.00012209	0	0	0	0	0	0	0	0	0	0	0	0	0	0	0	0	0	0	0	0	0	0	0	0	0	0
ENSDARG00000013051	0	0	0	0	0	0	0	0	0	0	0	0	0	0	0	0	0	0	0	0	0	0	0	0	0	0	0	0	0	0	0	0	0	0	0	0	0	0	0	0	0	0	0	0	0	0	0	0	0
ENSDARG00000013056	0	0	0	0	0	0	0	0	0	0	0	0	0	0	0	0	0	0	0	0	0	0	0	0	0	0	0	0	0	0	0	0	0	0	0	0	0	0	0	0	0	0	0	0	0	0	0	0	0
ENSDARG00000013057	0	0	0	0	0	0	0	0	0	0	0	0	0	0	0	0	0	2.00048844	0	0	0	0	0	0	0	0	0	0	0	0	0	0	0	0	0	0	0	0	0	0	0	0	0	0	0	0	0	0	0
ENSDARG00000013058	0	0	0	0	0	0	0	0	0	0	0	0	0	0	0	0	0	0	0	0	0	0	0	0	0	0	0	0	0	0	0	0	0	0	0	0	0	0	0	0	0	0	0	0	0	0	0	0	0
ENSDARG00000013063	0	0	0	0	0	0	0	0	0	0	0	0	0	0	0	0	0	0	0	0	0	0	0	0	0	0	0	0	0	0	0	0	0	0	0	0	0	0	0	0	0	0	0	0	0	0	0	0	0
ENSDARG00000013072	0	0	0	0	0	0	0	0	0	1.00012209	0	0	0	0	0	0	0	0	0	0	0	0	0	0	0	0	0	0	0	0	0	0	0	0	0	0	0	0	0	0	0	0	0	0	0	0	0	0	0
ENSDARG00000013075	0	0	0	0	0	0	0	0	0	0	0	0	0	0	0	0	0	2.00048844	0	0	0	0	0	0	0	0	0	0	0	0	0	0	0	0	0	0	0	0	0	0	0	0	0	0	0	0	0	0	0
ENSDARG00000013076	0	0	0	0	0	0	0	0	0	1.00012209	0	0	0	0	0	0	0	2.00048844	0	0	0	0	0	0	0	0	0	0	0	0	0	0	0	0	0	0	0	0	0	0	0	0	0	0	0	0	0	0	0
ENSDARG00000013078	5.003054244	0	0	0	0	0	2.00048844	14.02398044	0	7.005988269	0	5.003054244	0	1.00012209	7.005988269	0	0	35.15039348	1.00012209	0	0	0	19.04420413	0	1.00012209	0	0	0	0	0	4.001954397	3.00109917	0	0	4.001954397	2.00048844	2.00048844	0	1.00012209	3.00109917	0	1.00012209	0	0	0	0	16.03133162	1.00012209	0
ENSDARG00000013079	0	0	0	0	0	0	0	0	0	0	0	0	0	0	0	0	0	0	0	0	0	0	1.00012209	0	0	0	0	0	0	0	0	0	0	0	0	0	0	0	0	0	0	0	0	0	0	0	0	0	0
ENSDARG00000013082	0	0	0	0	0	0	0	0	0	0	0	0	0	0	0	0	0	0	0	0	0	0	0	0	0	0	0	0	0	0	0	0	0	0	0	0	0	0	0	0	0	0	0	0	0	0	0	0	0
ENSDARG00000013087	0	0	0	0	0	0	0	0	0	8.007822687	0	0	0	0	0	0	0	0	0	0	0	0	0	0	1.00012209	1.00012209	0	0	0	0	3.00109917	0	2.00048844	0	0	0	0	0	0	0	0	0	0	0	0	0	0	0	0
ENSDARG00000013095	0	0	0	0	0	0	0	7.005988269	0	0	0	0	0	0	0	0	0	1.00012209	0	0	0	0	0	0	0	0	0	0	0	0	0	0	0	0	0	0	0	0	0	0	0	0	0	0	0	0	0	0	0
ENSDARG00000013110	0	0	0	0	0	0	0	0	0	0	0	1.00012209	0	0	0	0	0	0	2.00048844	0	0	0	0	0	0	0	0	0	0	0	0	0	0	0	0	0	0	0	0	0	0	0	0	0	0	0	2.00048844	0	0
ENSDARG00000013117	0	0	0	0	0	0	0	0	0	0	0	0	0	0	0	0	0	0	0	0	0	0	0	0	1.00012209	0	0	0	0	0	0	0	1.00012209	0	0	0	0	0	0	0	0	0	0	0	0	0	1.00012209	0	0
ENSDARG00000013122	0	0	0	0	0	0	3.00109917	2.00048844	0	1.00012209	0	3.00109917	0	0	0	0	0	0	0	0	0	0	0	0	0	0	0	0	0	0	0	0	1.00012209	0	0	0	0	0	0	0	0	0	0	0	0	0	1.00012209	0	0
ENSDARG00000013128	0	0	0	0	0	0	0	0	0	0	0	0	0	0	0	0	0	2.00048844	0	0	0	0	0	0	0	0	0	0	0	0	0	0	0	0	0	0	0	0	0	0	0	0	0	0	0	0	1.00012209	0	0
ENSDARG00000013144	2.00048844	3.00109917	0	2.00048844	0	0	1.00012209	7.005988269	4.001954397	39.18685599	0	2.00048844	3.00109917	0	2.00048844	0	0	15.02753306	5.003054244	0	0	2.00048844	11.01479701	0	10.01222694	0	1.00012209	1.00012209	0	5.003054244	6.004398828	3.00109917	6.004398828	1.00012209	3.00109917	0	2.00048844	1.00012209	0	3.00109917	0	12.01761253	0	4.001954397	0	1.00012209	36.15913625	0	0
ENSDARG00000013150	0	0	0	0	0	0	0	0	0	0	0	0	0	0	0	0	0	2.00048844	0	0	0	0	0	0	0	0	0	0	0	0	0	0	0	0	0	0	0	0	0	0	0	0	0	0	0	0	0	0	0
ENSDARG00000013153	0	0	0	0	0	0	0	0	0	0	0	0	0	0	0	0	0	0	0	0	0	0	0	0	0	0	0	0	0	0	0	0	0	0	0	0	0	0	0	0	0	0	0	0	0	0	0	0	0
ENSDARG00000013161	0	0	0	0	0	0	0	0	0	0	0	0	0	0	0	0	0	0	0	0	0	0	0	0	0	0	0	0	0	0	0	0	0	0	0	0	2.00048844	0	0	0	0	0	0	0	0	0	1.00012209	0	0
ENSDARG00000013168	0	0	0	0	0	0	0	0	0	0	0	0	0	0	0	0	0	1.00012209	0	0	0	0	0	0	0	0	0	0	0	0	0	0	0	0	0	0	0	0	0	0	0	0	0	0	0	0	0	0	0
ENSDARG00000013174	0	0	0	0	0	0	0	0	0	0	0	0	0	0	0	0	0	2.00048844	0	0	0	0	0	0	0	0	0	0	0	0	0	0	0	0	0	0	0	0	0	0	0	0	0	0	0	0	0	0	0
ENSDARG00000013175	1.00012209	0	0	0	0	0	0	1.00012209	0	0	0	1.00012209	0	0	0	0	0	2.00048844	1.00012209	0	0	0	3.00109917	0	0	0	0	0	0	0	0	3.00109917	0	0	0	0	0	0	0	2.00048844	0	0	0	0	0	0	6.004398828	0	0
ENSDARG00000013177	0	0	0	0	0	0	0	0	0	0	0	0	0	0	0	0	0	0	0	0	0	0	0	0	0	0	0	0	0	0	1.00012209	0	0	0	0	0	0	0	0	0	0	0	0	0	0	0	0	0	0
ENSDARG00000013184	1.00012209	0	0	0	0	0	0	3.00109917	0	4.001954397	0	1.00012209	0	1.00012209	0	0	0	3.00109917	0	0	0	0	1.00012209	0	0	0	0	0	0	0	0	0	1.00012209	0	0	0	3.00109917	0	0	0	0	0	0	0	0	0	3.00109917	0	0
ENSDARG00000013207	0	0	0	1.00012209	0	0	1.00012209	1.00012209	0	1.00012209	0	0	0	0	0	0	0	0	2.00048844	0	0	0	1.00012209	0	0	2.00048844	0	0	0	0	5.003054244	0	0	0	0	0	0	0	0	1.00012209	1.00012209	0	0	0	0	0	1.00012209	0	0
ENSDARG00000013221	0	0	0	0	0	0	0	0	0	0	0	0	0	0	0	0	0	0	0	0	0	0	0	0	0	0	0	0	0	0	0	0	0	0	0	0	0	0	0	0	0	0	0	0	0	0	0	0	0
ENSDARG00000013222	0	0	0	0	0	0	0	0	0	1.00012209	0	0	0	0	0	0	0	1.00012209	0	0	0	0	1.00012209	0	0	0	0	0	0	0	1.00012209	0	0	0	0	0	0	0	0	0	0	0	0	0	0	0	0	0	0
ENSDARG00000013224	0	0	0	0	0	0	0	0	0	0	0	0	0	0	0	0	0	0	0	0	0	0	1.00012209	0	0	0	0	0	0	0	0	0	0	0	0	0	0	0	0	1.00012209	0	0	0	0	0	0	0	0	0
ENSDARG00000013245	0	0	0	0	0	0	1.00012209	0	0	0	0	0	0	0	0	0	0	0	0	0	0	0	0	0	0	0	0	0	0	0	0	0	0	0	0	0	0	0	0	0	0	0	0	0	0	0	0	0	0
ENSDARG00000013250	0	0	0	0	0	0	0	4.001954397	0	1.00012209	0	0	0	0	0	0	1.00012209	6.004398828	1.00012209	0	0	0	1.00012209	0	0	0	0	0	0	0	0	1.00012209	0	0	3.00109917	0	2.00048844	0	0	0	0	0	0	0	0	0	4.001954397	0	0
ENSDARG00000013266	0	0	0	0	0	0	0	0	0	0	0	0	0	0	0	0	0	0	0	0	0	0	0	0	0	0	0	0	0	0	0	0	0	0	0	0	0	0	0	0	0	0	0	0	0	0	0	0	0
ENSDARG00000013269	0	0	0	0	0	0	0	0	0	0	0	1.00012209	0	0	0	0	0	0	1.00012209	0	0	0	2.00048844	0	0	0	0	0	0	0	0	1.00012209	1.00012209	0	0	0	0	0	0	0	0	0	0	0	0	0	1.00012209	0	0
ENSDARG00000013274	0	0	0	0	0	0	1.00012209	0	0	0	0	0	0	0	0	0	0	3.00109917	0	0	0	0	1.00012209	0	2.00048844	0	0	0	0	0	0	0	0	0	1.00012209	0	0	0	0	0	0	0	0	0	0	0	0	0	0
ENSDARG00000013279	0	0	0	0	0	0	0	0	0	0	0	0	0	0	0	0	0	0	0	0	0	0	0	0	0	0	0	0	0	0	0	0	0	0	0	0	0	0	0	0	0	0	0	0	0	0	0	0	0
ENSDARG00000013292	0	0	0	0	0	0	0	0	0	1.00012209	0	0	0	0	0	0	0	0	0	0	0	0	0	0	0	0	0	0	0	0	0	0	0	0	0	0	0	0	0	0	0	0	0	0	0	0	0	0	0
ENSDARG00000013295	0	0	0	0	0	0	0	0	0	0	0	0	0	0	0	0	0	0	0	0	0	0	0	0	0	0	0	0	0	0	0	0	0	0	0	0	0	0	0	0	0	0	0	0	0	0	0	0	0
ENSDARG00000013302	0	0	0	0	0	0	0	0	0	0	0	0	0	0	0	0	0	1.00012209	0	0	0	0	0	0	0	0	0	0	0	0	0	0	0	0	0	0	0	0	0	0	0	0	0	0	0	0	0	0	0
ENSDARG00000013307	20.04898766	0	9.009902203	0	0	2.00048844	3.00109917	30.11040269	0	64.50527014	0	15.02753306	3.00109917	0	18.03966704	1.00012209	2.00048844	84.87328824	25.07660581	0	0	0	49.29544947	0	5.003054244	1.00012209	1.00012209	0	1.00012209	1.00012209	26.08287041	6.004398828	37.16812751	0	12.01761253	5.003054244	13.02067364	1.00012209	0	75.69514423	0	0	0	0	1.00012209	2.00048844	89.98115772	0	0
ENSDARG00000013310	0	0	0	0	0	0	0	11.01479701	0	6.004398828	0	0	0	0	0	0	0	0	0	0	0	0	0	0	0	0	0	0	0	0	0	0	0	0	0	0	0	0	0	0	0	0	0	0	0	0	0	0	0
ENSDARG00000013312	0	0	0	0	0	0	1.00012209	0	0	0	0	2.00048844	0	0	2.00048844	0	0	0	1.00012209	0	0	0	1.00012209	0	0	0	0	0	0	0	0	0	1.00012209	0	1.00012209	0	1.00012209	0	0	0	0	0	0	0	0	0	1.00012209	0	0
ENSDARG00000013317	0	0	0	0	0	0	0	0	0	18.03966704	0	0	0	0	0	0	0	4.001954397	1.00012209	0	0	1.00012209	1.00012209	0	1.00012209	0	0	0	0	0	0	0	1.00012209	0	0	0	0	0	0	0	0	0	0	0	0	0	6.004398828	0	0
ENSDARG00000013329	0	0	0	0	0	0	0	0	0	0	0	0	0	0	0	0	0	0	0	0	0	0	0	0	0	0	0	0	0	0	0	0	0	0	0	0	0	0	0	0	0	0	0	0	0	0	0	0	0
ENSDARG00000013333	0	0	0	0	0	0	0	0	0	10.01222694	0	0	0	0	0	0	0	2.00048844	0	0	0	0	0	0	1.00012209	0	0	0	0	0	0	0	0	0	0	0	0	0	0	1.00012209	0	1.00012209	0	0	0	0	0	0	0
ENSDARG00000013335	0	0	0	0	0	0	0	0	0	3.00109917	0	0	0	0	0	0	0	1.00012209	1.00012209	0	0	0	0	0	0	0	0	0	0	0	0	0	0	2.00048844	0	0	0	0	0	0	0	1.00012209	0	0	0	0	0	0	0
ENSDARG00000013340	0	0	0	0	0	0	0	0	0	0	0	0	0	0	0	0	0	0	0	0	0	0	0	0	0	0	0	0	0	0	0	0	1.00012209	0	0	0	0	0	0	0	0	0	0	0	0	0	0	0	0
ENSDARG00000013343	0	0	1.00012209	0	0	0	0	0	0	0	0	0	0	0	0	0	0	6.004398828	0	0	0	0	0	0	2.00048844	0	0	0	0	0	0	0	0	0	0	0	0	0	0	0	0	2.00048844	0	0	0	0	0	0	0
ENSDARG00000013346	0	0	0	0	0	0	0	0	0	0	0	0	0	0	0	0	0	1.00012209	0	0	0	0	0	0	0	0	0	0	0	0	0	0	0	0	0	0	0	0	0	0	0	0	0	0	0	0	1.00012209	0	0
ENSDARG00000013351	6.004398828	5.003054244	0	2.00048844	0	0	0	13.02067364	0	36.15913625	0	4.001954397	2.00048844	0	9.009902203	1.00012209	0	30.11040269	9.009902203	0	0	0	14.02398044	0	2.00048844	1.00012209	0	1.00012209	0	0	8.007822687	9.009902203	19.04420413	0	1.00012209	3.00109917	9.009902203	0	0	5.003054244	0	3.00109917	0	0	0	0	39.18685599	0	0
ENSDARG00000013360	0	0	0	0	0	0	0	8.007822687	0	0	0	0	0	0	0	0	0	3.00109917	0	0	0	0	0	0	0	0	0	0	0	0	2.00048844	0	0	0	0	1.00012209	0	0	0	0	0	0	0	0	0	0	0	0	0
ENSDARG00000013371	0	0	0	0	0	0	0	0	0	8.007822687	0	0	0	0	0	0	0	0	1.00012209	0	0	0	1.00012209	0	0	0	0	0	0	0	0	2.00048844	1.00012209	0	0	0	0	0	0	0	0	0	0	0	0	0	0	0	0
ENSDARG00000013375	1.00012209	0	0	0	0	0	0	1.00012209	0	0	0	0	0	0	0	0	0	2.00048844	0	0	0	0	2.00048844	0	0	0	0	0	0	0	2.00048844	0	0	0	0	0	0	0	0	0	0	0	0	0	0	0	1.00012209	0	0
ENSDARG00000013379	0	0	0	0	0	0	0	1.00012209	0	2.00048844	0	1.00012209	0	0	0	0	0	4.001954397	2.00048844	0	0	0	0	0	0	0	0	0	0	0	0	3.00109917	0	0	0	0	0	0	0	0	0	0	0	0	0	0	1.00012209	0	0
ENSDARG00000013382	1.00012209	0	0	0	1.00012209	0	1.00012209	2.00048844	0	2.00048844	0	0	0	1.00012209	2.00048844	0	0	7.005988269	0	0	0	0	3.00109917	0	0	0	0	0	0	0	0	0	1.00012209	0	0	0	0	0	0	0	0	0	0	0	0	0	3.00109917	0	0
ENSDARG00000013390	0	0	0	0	0	0	0	0	0	0	0	0	0	0	0	0	0	0	0	0	0	0	0	0	0	0	0	0	0	0	0	0	0	0	0	0	0	0	0	0	0	0	0	0	0	0	0	0	0
ENSDARG00000013397	0	0	0	0	0	0	0	0	0	0	0	0	0	0	0	0	0	3.00109917	0	0	0	0	0	0	0	0	0	0	0	0	0	0	0	0	0	0	0	0	0	0	0	0	0	0	0	0	1.00012209	0	0
ENSDARG00000013400	0	0	0	0	0	0	0	0	0	0	0	0	0	0	0	0	0	0	0	0	0	0	0	0	0	0	0	0	0	0	0	0	0	0	0	0	0	0	0	0	0	0	0	0	0	0	0	0	0
ENSDARG00000013415	0	0	0	0	0	0	0	0	0	1.00012209	0	0	0	0	0	0	0	3.00109917	0	0	0	0	8.007822687	0	0	0	0	0	0	0	0	1.00012209	0	0	0	1.00012209	0	0	0	1.00012209	0	0	0	0	0	0	31.11790484	0	0
ENSDARG00000013420	0	0	0	0	0	0	0	0	0	0	0	0	0	0	0	0	0	1.00012209	0	0	0	0	1.00012209	0	0	0	0	0	0	0	0	0	0	0	0	0	1.00012209	0	0	0	0	0	0	0	0	0	0	0	0
ENSDARG00000013422	0	0	0	0	0	0	0	0	0	29.10314829	0	1.00012209	0	0	1.00012209	0	0	0	0	0	0	1.00012209	0	0	0	0	0	0	0	16.03133162	0	1.00012209	0	0	0	0	1.00012209	0	0	0	0	3.00109917	0	1.00012209	0	0	0	0	0
[truncated: 21,787 more rows]
[truncated: 1,487 more columns]
