# Supplementary material for: Single-cell analysis uncovers that metabolic reprogramming by ErbB2 signaling is essential for cardiomyocyte proliferation in the regenerating heart
Source: eLife. 2019 Dec 23;8:e50163. doi: 10.7554/eLife.50163 (PMC7000220; doi:10.7554/eLife.50163)
Supplement: Figure 3—source data 1. [file elife-50163-fig3-data1.xlsx]

## Sheet: genes_SOM.xls
GeneID	module nr	avrg expression	gene symbol	gene name
ENSDARG00000002013	1	5.28546	GRB10A	growth factor receptor-bound protein 10a
ENSDARG00000009087	1	26.1872	CD74A	CD74 molecule, major histocompatibility complex, class II invariant chain a
ENSDARG00000012405	1	3.83529	COL1A1A	collagen, type I, alpha 1a
ENSDARG00000019307	1	2.24634	DUSP5	dual specificity phosphatase 5
ENSDARG00000022013	1	4.64553
ENSDARG00000036628	1	11.163	CD74B	CD74 molecule, major histocompatibility complex, class II invariant chain b
ENSDARG00000041959	1	5.59879	CXCR4B	chemokine (C-X-C motif), receptor 4b
ENSDARG00000044129	1	3.67811	SI:CH211-214P16.1	si:ch211-214p16.1
ENSDARG00000045141	1	19.0661	AQP8A.1	aquaporin 8a, tandem duplicate 1
ENSDARG00000053858	1	5.42913	CRIP1	cysteine-rich protein 1
ENSDARG00000060498	1	2.24634	TNFRSF9A	tumor necrosis factor receptor superfamily, member 9a
ENSDARG00000063895	1	116.713	MT-ND1	NADH dehydrogenase 1, mitochondrial
ENSDARG00000063899	1	117.418	MT-ND2	NADH dehydrogenase 2, mitochondrial
ENSDARG00000063905	1	498.29	MT-CO1	cytochrome c oxidase I, mitochondrial
ENSDARG00000063908	1	574.687	MT-CO2	cytochrome c oxidase II, mitochondrial
ENSDARG00000063910	1	6.18782	MT-ATP8	ATP synthase 8, mitochondrial
ENSDARG00000063911	1	391.367	MT-ATP6	ATP synthase 6, mitochondrial
ENSDARG00000063912	1	391.439	MT-CO3	cytochrome c oxidase III, mitochondrial
ENSDARG00000063914	1	68.3073	MT-ND3	NADH dehydrogenase 3, mitochondrial
ENSDARG00000063916	1	11.5412	MT-ND4L	NADH dehydrogenase 4L, mitochondrial
ENSDARG00000063917	1	180.211	MT-ND4	NADH dehydrogenase 4, mitochondrial
ENSDARG00000063921	1	49.5087	MT-ND5	NADH dehydrogenase 5, mitochondrial
ENSDARG00000063922	1	4.32106	MT-ND6	NADH dehydrogenase 6, mitochondrial
ENSDARG00000063924	1	246.702	MT-CYB	cytochrome b, mitochondrial
ENSDARG00000070266	1	17.2893	SPOCK3	sparc/osteonectin, cwcv and kazal-like domains proteoglycan (testican) 3
ENSDARG00000077231	1	2.77218	VWF	von Willebrand factor
ENSDARG00000077641	1	3.19081	THBS3A	thrombospondin 3a
ENSDARG00000080128	1	5.94028	AC024175.1	MT-tRNA
ENSDARG00000080337	1	2807.4	AC024175.4	MT-tRNA
ENSDARG00000081369	1	5.7599	AC024175.9	MT-tRNA
ENSDARG00000081938	1	7.82958	AC024175.13	MT-tRNA
ENSDARG00000082753	1	183.896	AC024175.17	MT-tRNA
ENSDARG00000082787	1	3.96148	5S_RRNA	5S ribosomal RNA
ENSDARG00000083310	1	6.49255	DRE-MIR-146A	dre-mir-146a
ENSDARG00000089327	1	2.24634
ENSDARG00000089441	1	2.41652	SI:CH211-105C13.3	si:ch211-105c13.3
ENSDARG00000090113	1	7.1725
ENSDARG00000094706	1	2.24634	CXCL11.6	chemokine (C-X-C motif) ligand 11, duplicate 6
ENSDARG00000095556	1	37.933	SI:DKEY-238C7.12	si:dkey-238c7.12
ENSDARG00000006526	2	10.0962	FN1B	fibronectin 1b
ENSDARG00000009978	2	10.0315	ICN	ictacalcin
ENSDARG00000033466	2	6.59753	TAGLN2	transgelin 2
ENSDARG00000044975	2	13.587	KRT94	keratin 94
ENSDARG00000056795	2	6.22812	SERPINE1	serpin peptidase inhibitor, clade E (nexin, plasminogen activator inhibitor type 1), member 1
ENSDARG00000063708	2	2.36513	tbk1	TANK-binding kinase 1
ENSDARG00000005861	3	2.41652	RALGAPA2	Ral GTPase activating protein, alpha subunit 2 (catalytic)
ENSDARG00000058358	3	23.5528	KRT8	keratin 8
ENSDARG00000058980	3	4.48788
ENSDARG00000061165	3	17.363	SLC6A4A	solute carrier family 6 (neurotransmitter transporter), member 4a
ENSDARG00000070434	3	2.00393	RHOV	ras homolog family member V
ENSDARG00000087277	3	2.36513	SELJ	selenoprotein J
ENSDARG00000006514	4	5.61595	HER6	hairy-related 6
ENSDARG00000031776	4	3.59106	ZGC:92066	zgc:92066
ENSDARG00000042962	4	2.8172	DGCR2	DiGeorge syndrome critical region gene 2
ENSDARG00000056978	4	2.74414	LETM1	leucine zipper-EF-hand containing transmembrane protein 1
ENSDARG00000059699	4	2.00393	DNAJC16_(1_OF_MANY)	DnaJ heat shock protein family (Hsp40) member C16
ENSDARG00000004377	5	7.45058	PPP1R13BA	protein phosphatase 1, regulatory subunit 13Ba
ENSDARG00000006275	5	2.41652
ENSDARG00000007671	5	2.5896	GHRB	growth hormone receptor b
ENSDARG00000007960	5	3.36493	HNRNPABA	heterogeneous nuclear ribonucleoprotein A/Ba
ENSDARG00000008292	5	2.15622	EIF2S3	eukaryotic translation initiation factor 2, subunit 3 gamma
ENSDARG00000008859	5	3.36493	MYLIPA	myosin regulatory light chain interacting protein a
ENSDARG00000011824	5	8.26831	PBXIP1B	pre-B-cell leukemia homeobox interacting protein 1b
ENSDARG00000013351	5	23.0218	CIRBPB	cold inducible RNA binding protein b
ENSDARG00000014830	5	9.08624
ENSDARG00000016651	5	13.998	ZNF106A	zinc finger protein 106a
ENSDARG00000017219	5	37.8406	PABPC1A	poly(A) binding protein, cytoplasmic 1a
ENSDARG00000018602	5	2.81176	RAB5AA	RAB5A, member RAS oncogene family, a
ENSDARG00000018989	5	2.5484	HSPA4B	heat shock protein 4b
ENSDARG00000019417	5	5.08163	GADD45GA	growth arrest and DNA-damage-inducible, gamma a
ENSDARG00000020178	5	2.5896	NOVA1	neuro-oncological ventral antigen 1
ENSDARG00000020764	5	2.5484	SLMAPB	sarcolemma associated protein b
ENSDARG00000020893	5	7.64706	SLC25A22	solute carrier family 25 (mitochondrial carrier: glutamate), member 22
ENSDARG00000021140	5	17.2766	PABPC1B	poly A binding protein, cytoplasmic 1 b
ENSDARG00000021252	5	6.63305	CCT6A	chaperonin containing TCP1, subunit 6A (zeta 1)
ENSDARG00000023921	5	5.50765		hsp40
ENSDARG00000025522	5	2.18665	SGK1	serum/glucocorticoid regulated kinase 1
ENSDARG00000026611	5	3.99806	SOCS3B	suppressor of cytokine signaling 3b
ENSDARG00000028323	5	2.5484
ENSDARG00000028676	5	3.66708	NUAK1B	NUAK family, SNF1-like kinase, 1b
ENSDARG00000029663	5	2.53256	RAB1AB	RAB1A, member RAS oncogene family b
ENSDARG00000029764	5	10.7227	MEF2CA	myocyte enhancer factor 2ca
ENSDARG00000031702	5	2.80363	PRKG1B	protein kinase, cGMP-dependent, type Ib
ENSDARG00000031795	5	2.5484	ABCF1	ATP-binding cassette, sub-family F (GCN20), member 1
ENSDARG00000032802	5	3.36493	KTN1	kinectin 1
ENSDARG00000035751	5	2.53256	IPO7	importin 7
ENSDARG00000035756	5	9.90437
ENSDARG00000035871	5	10.7227	RPL30	ribosomal protein L30
ENSDARG00000037421	5	6.20181	EGR1	early growth response 1
ENSDARG00000038559	5	3.54264	H1F0	H1 histone family, member 0
ENSDARG00000042236	5	2.5484	ATRX	alpha thalassemia/mental retardation syndrome X-linked homolog (human)
ENSDARG00000042389	5	14.8174		ribosomal
ENSDARG00000042848	5	4.6207	PCMTL	l-isoaspartyl protein carboxyl methyltransferase, like
ENSDARG00000043502	5	6.63305	CCDC124	coiled-coil domain containing 124
ENSDARG00000043571	5	3.36493	KIF2A	zgc:103670
ENSDARG00000044093	5	7.45058	RPL13A	ribosomal protein L13a
ENSDARG00000045947	5	12.36
ENSDARG00000052022	5	2.15628
ENSDARG00000052747	5	2.53256	GPATCH3	G patch domain containing 3
ENSDARG00000053365	5	12.36	RPL31	ribosomal protein L31
ENSDARG00000053753	5	2.53256	MFF	mitochondrial fission factor
ENSDARG00000054272	5	3.36493	CAPRIN1B	cell cycle associated protein 1b
ENSDARG00000054290	5	3.36493	ACIN1A	apoptotic chromatin condensation inducer 1a
ENSDARG00000059906	5	9.53037	SDC4	syndecan 4
ENSDARG00000062054	5	2.41652	CPT1AB	carnitine palmitoyltransferase 1Ab (liver)
ENSDARG00000063167	5	2.5896	CHKB	choline kinase beta
ENSDARG00000068478	5	2.5896	GPX4A	glutathione peroxidase 4a
ENSDARG00000069135	5	13.8282	PPP1R15A	protein phosphatase 1, regulatory subunit 15A
ENSDARG00000071113	5	10.5845	XIRP2A	xin actin binding repeat containing 2a
ENSDARG00000074242	5	4.99859	SERBP1A	SERPINE1 mRNA binding protein 1a
ENSDARG00000074758	5	4.99859	CSDE1	cold shock domain containing E1, RNA-binding
ENSDARG00000075024	5	3.36493		kif1c?
ENSDARG00000077785	5	4.99859	ATF5B	activating transcription factor 5b
ENSDARG00000078227	5	3.21237	CSPG4	chondroitin sulfate proteoglycan 4
ENSDARG00000081926	5	3.36493	SNORD33	Small nucleolar RNA Z195/SNORD33/SNORD32 family
ENSDARG00000090013	5	2.5484	SI:DKEY-248G15.2	si:dkey-248g15.2
ENSDARG00000091479	5	2.74894
ENSDARG00000093817	5	13.5931
ENSDARG00000095268	5	9.53037	SI:DKEY-261H17.1	si:dkey-261h17.1
ENSDARG00000001950	6	35.026	AK1	adenylate kinase 1
ENSDARG00000003191	6	3.39802
ENSDARG00000004187	6	5.08163	DNAJB5_(1_OF_MANY)	DnaJ heat shock protein family (Hsp40) member B5
ENSDARG00000005791	6	6.63305	RPL28	ribosomal protein L28
ENSDARG00000006316	6	8.26831	RPL23A	ribosomal protein L23a
ENSDARG00000006413	6	8.26831	RPL38	ribosomal protein L38
ENSDARG00000007320	6	11.6051	RPL7	ribosomal protein L7
ENSDARG00000009285	6	7.76063	RPL15	ribosomal protein L15
ENSDARG00000009779	6	4.95937	MCL1A	myeloid cell leukemia 1a
ENSDARG00000010516	6	9.08624	RPL21	ribosomal protein L21
ENSDARG00000011400	6	36.1909	TNNC1A	troponin C type 1a (slow)
ENSDARG00000011405	6	10.8354	RPS9	ribosomal protein S9
ENSDARG00000012381	6	2.74414	HSC70	heat shock cognate 70
ENSDARG00000012513	6	3.13637	SDCBP2	syndecan binding protein (syntenin) 2
ENSDARG00000012709	6	2.00393
ENSDARG00000013012	6	10.1502
ENSDARG00000013307	6	18.0967	RPL19	ribosomal protein L19
ENSDARG00000014230	6	5.131	DLST	dihydrolipoamide S-succinyltransferase
ENSDARG00000016443	6	6.63305	EIF3C	eukaryotic translation initiation factor 3, subunit C
ENSDARG00000017775	6	3.18895	ATP5G3A	ATP synthase, H+ transporting, mitochondrial Fo complex, subunit C3 (subunit 9), genome duplicate a
ENSDARG00000018334	6	11.5412	RPL35	ribosomal protein L35
ENSDARG00000019231	6	5.33974	SPNA2	spectrin alpha 2
ENSDARG00000019332	6	4.02836	NDUFB4	NADH dehydrogenase (ubiquinone) 1 beta subcomplex, 4
ENSDARG00000020086	6	2.51957	NUAK1A	NUAK family, SNF1-like kinase, 1a
ENSDARG00000022833	6	13.2489
ENSDARG00000023298	6	7.45058	RPS27.1	ribosomal protein S27, isoform 1
ENSDARG00000025073	6	10.7227	RPL18A	ribosomal protein L18a
ENSDARG00000025850	6	7.74696	RPS21	ribosomal protein S21
ENSDARG00000026655	6	2.5896	TSPO	translocator protein
ENSDARG00000027744	6	23.5528	GADD45BA	growth arrest and DNA-damage-inducible, beta a
ENSDARG00000029150	6	12.36	HSP90AB1	heat shock protein 90, alpha (cytosolic), class B member 1
ENSDARG00000029500	6	7.76063	RPL34	ribosomal protein L34
ENSDARG00000030012	6	2.15628	LRRFIP1A	leucine rich repeat (in FLII) interacting protein 1a
ENSDARG00000030585	6	8.26831
ENSDARG00000032725	6	15.7978	RPS27A	ribosomal protein S27a
ENSDARG00000033789	6	2.45751	NDUFB7	NADH dehydrogenase (ubiquinone) 1 beta subcomplex, 7
ENSDARG00000034291	6	2.9166	RPL37	ribosomal protein L37
ENSDARG00000035596	6	2.41652	ISCU_(1_OF_MANY)	iron-sulfur cluster assembly enzyme
ENSDARG00000035692	6	8.84145	RPS3A	ribosomal protein S3A
ENSDARG00000036044	6	9.08624	RPS20	ribosomal protein S20
ENSDARG00000036174	6	7.82805
ENSDARG00000036298	6	4.99859	RPS13	ribosomal protein S13
ENSDARG00000036316	6	5.84196	RPL39	ribosomal protein L39
ENSDARG00000036438	6	3.48078	NDUFV1	NADH dehydrogenase (ubiquinone) flavoprotein 1
ENSDARG00000036629	6	8.91297	RPS14	ribosomal protein S14
ENSDARG00000036875	6	12.36	RPS12	ribosomal protein S12
ENSDARG00000037071	6	4.71021	RPS26	ribosomal protein S26
ENSDARG00000037393	6	3.91167	SLC43A1A	solute carrier family 43 (amino acid system L transporter), member 1a
ENSDARG00000037867	6	5.15854	SI:CH211-194I10.5	si:ch211-194i10.5
ENSDARG00000037870	6	43.6155	ACTB2	actin, beta 2
ENSDARG00000038068	6	3.28775	DDX5	DEAD (Asp-Glu-Ala-Asp) box helicase 5
ENSDARG00000039347	6	10.7227	RPS24	ribosomal protein S24
ENSDARG00000039399	6	3.21237	NT5C2A	5'-nucleotidase, cytosolic IIa
ENSDARG00000039641	6	13.1789
ENSDARG00000040439	6	3.15975	RSL24D1	ribosomal L24 domain containing 1
ENSDARG00000041232	6	7.45058	RPS29	ribosomal protein S29
ENSDARG00000041435	6	9.08624	UBA52	ubiquitin A-52 residue ribosomal protein fusion product 1
ENSDARG00000041599	6	2.36513	ZGC:91860	zgc:91860
ENSDARG00000041811	6	10.7227	RPS25	ribosomal protein S25
ENSDARG00000042566	6	8.91297	RPS7	ribosomal protein S7
ENSDARG00000043453	6	11.6051	RPS5	ribosomal protein S5
ENSDARG00000043457	6	87.4404	GAPDH	glyceraldehyde-3-phosphate dehydrogenase
ENSDARG00000044562	6	8.31659	CYCSB	cytochrome c, somatic b
ENSDARG00000044601	6	2.00393	RTN4A	reticulon 4a
ENSDARG00000045487	6	11.5412	RPS16	ribosomal protein S16
ENSDARG00000046119	6	8.40244
ENSDARG00000046157	6	6.16042	RPS17	ribosomal protein S17
ENSDARG00000053457	6	9.08624	RPL23	ribosomal protein L23
ENSDARG00000054300	6	2.5896	DHRS1	dehydrogenase/reductase (SDR family) member 1
ENSDARG00000054537	6	2.42058	NHSL1A	NHS-like 1a
ENSDARG00000054818	6	11.2202	RPL32	ribosomal protein L32
ENSDARG00000055751	6	24.2611	FOSB	FBJ murine osteosarcoma viral oncogene homolog B
ENSDARG00000056119	6	10.4507	EEF1G	eukaryotic translation elongation factor 1 gamma
ENSDARG00000057687	6	2.13758	SBK3	SH3 domain binding kinase family, member 3
ENSDARG00000058105	6	9.90437	RPL36A	ribosomal protein L36A
ENSDARG00000058451	6	13.1789	RPL6	ribosomal protein L6
ENSDARG00000058597	6	2.39425	NT5C3A	5'-nucleotidase, cytosolic IIIA
ENSDARG00000059836	6	2.6046	DDIT3	DNA-damage-inducible transcript 3
ENSDARG00000062721	6	2.5896	DENND4A	DENN/MADD domain containing 4A
ENSDARG00000068214	6	4.21406	CCNI	cyclin I
ENSDARG00000069100	6	2.84251	ALDH9A1A.1	aldehyde dehydrogenase 9 family, member A1a, tandem duplicate 1
ENSDARG00000070437	6	7.79956	RPL22	ribosomal protein L22
ENSDARG00000070844	6	2.84204	GAMT	guanidinoacetate N-methyltransferase
ENSDARG00000070849	6	11.2202	RPS15	ribosomal protein S15
ENSDARG00000071378	6	2.84204	SI:DKEY-78L4.14	si:dkey-78l4.14
ENSDARG00000076412	6	2.00393
ENSDARG00000077291	6	23.0218	RPS2	ribosomal protein S2
ENSDARG00000077717	6	6.2255
ENSDARG00000079307	6	3.52797	SI:DKEY-205H13.1	si:dkey-205h13.1
ENSDARG00000079617	6	4.46538
ENSDARG00000087456	6	4.30871
ENSDARG00000087636	6	3.15975	SI:DKEYP-86F7.3	si:dkeyp-86f7.3
ENSDARG00000088371	6	14.7175
ENSDARG00000089920	6	3.83592
ENSDARG00000092807	6	18.1623	RPL41	si:dkey-151g10.6
ENSDARG00000095897	6	12.474	ATP5E	ATP synthase, H+ transporting, mitochondrial F1 complex, epsilon subunit
ENSDARG00000096003	6	5.88691	USMG5	up-regulated during skeletal muscle growth 5 homolog (mouse)
ENSDARG00000013628	7	2.15628	CD164	CD164 molecule, sialomucin
ENSDARG00000020133	7	8.4618	JDP2B	Jun dimerization protein 2b
ENSDARG00000021864	7	10.6016	RPLP1	ribosomal protein, large, P1
ENSDARG00000030602	7	6.99288	RPS19	ribosomal protein S19
ENSDARG00000037350	7	9.90437	RPL9	ribosomal protein L9
ENSDARG00000042533	7	2.15628	GSTM.1	glutathione S-transferase mu, tandem duplicate 1
ENSDARG00000042905	7	9.68166	RPL10A	ribosomal protein L10a
ENSDARG00000055996	7	4.99859	RPS8A	ribosomal protein S8a
ENSDARG00000067850	7	5.63293	JUND	jun D proto-oncogene
ENSDARG00000087421	7	3.78772	SERBP1B	SERPINE1 mRNA binding protein 1b
ENSDARG00000091234	7	20.9861	CU019646.2
ENSDARG00000003216	8	25.221	ANXA2A	annexin A2a
ENSDARG00000007344	8	5.39215	TCAP	titin-cap (telethonin)
ENSDARG00000007682	8	3.75757	PPDPFA	pancreatic progenitor cell differentiation and proliferation factor a
ENSDARG00000015978	8	2.688	COX5B_(1_OF_MANY)	zgc:86599
ENSDARG00000019702	8	3.5786	ALDOCB	aldolase C, fructose-bisphosphate, b
ENSDARG00000022684	8	2.03517	FKBP1AA	FK506 binding protein 1Aa
ENSDARG00000024478	8	3.12055	MPC2	mitochondrial pyruvate carrier 2
ENSDARG00000025254	8	5.59737	S100A10B	S100 calcium binding protein A10b
ENSDARG00000026369	8	2.96214	DBI	diazepam binding inhibitor (GABA receptor modulator, acyl-CoA binding protein)
ENSDARG00000028389	8	2.33509	RAB44	RAB44, member RAS oncogene family
ENSDARG00000028889	8	3.18895	NDUFB10	NADH dehydrogenase (ubiquinone) 1 beta subcomplex, 10
ENSDARG00000030236	8	2.30318	TMEM30AA	transmembrane protein 30Aa
ENSDARG00000039997	8	3.92563	PTP4A3	protein tyrosine phosphatase type IVA, member 3
ENSDARG00000041400	8	2.42058	NDUFA3	NADH dehydrogenase (ubiquinone) 1 alpha subcomplex, 3
ENSDARG00000042904	8	3.78772	FOXO3B	forkhead box O3b
ENSDARG00000044125	8	5.06149	TXN	thioredoxin
ENSDARG00000058285	8	2.00393	CPT1B	carnitine palmitoyltransferase 1B (muscle)
ENSDARG00000079497	8	10.441	ZGC:110340	zgc:110340
ENSDARG00000010478	9	5.33974	HSP90AA1.1	heat shock protein 90, alpha (cytosolic), class A member 1, tandem duplicate 1
ENSDARG00000015128	9	7.53104	RPL27	ribosomal protein L27
ENSDARG00000035400	9	6.60914	BTF3	basic transcription factor 3
ENSDARG00000091334	9	11.532
ENSDARG00000002791	10	3.93604	ATP1A1A.1	ATPase, Na+/K+ transporting, alpha 1a polypeptide, tandem duplicate 1
ENSDARG00000003046	10	6.66538	SORBS2A	sorbin and SH3 domain containing 2a
ENSDARG00000014571	10	4.30871	CTNNB1	catenin (cadherin-associated protein), beta 1
ENSDARG00000015862	10	10.4507	RPL5B	ribosomal protein L5b
ENSDARG00000021443	10	6.99288	ZFP36L1B	zinc finger protein 36, C3H type-like 1b
ENSDARG00000023724	10	2.96214	CDC42SE1	CDC42 small effector 1
ENSDARG00000027249	10	5.84196	BTG1	B-cell translocation gene 1, anti-proliferative
ENSDARG00000034270	10	2.9776	OGDHA	oxoglutarate (alpha-ketoglutarate) dehydrogenase a (lipoamide)
ENSDARG00000037746	10	14.6614	ACTB1	actin, beta 1
ENSDARG00000039486	10	6.32354	BAG3	BCL2-associated athanogene 3
ENSDARG00000042874	10	4.74178	PHLDA2	pleckstrin homology-like domain, family A, member 2
ENSDARG00000045367	10	2.76411	TUBA1B	tubulin, alpha 1b
ENSDARG00000061688	10	2.75598	ARVCFB	armadillo repeat gene deleted in velocardiofacial syndrome b
ENSDARG00000062416	10	7.58305
ENSDARG00000068732	10	3.4411	SPRY4	sprouty homolog 4 (Drosophila)
ENSDARG00000071196	10	4.16424	SDPRB	serum deprivation response b
ENSDARG00000075433	10	5.41651	MYOM2	myomesin 2
ENSDARG00000075608	10	2.54152	MICAL2A	microtubule associated monooxygenase, calponin and LIM domain containing 2a
ENSDARG00000089418	10	9.27104	SI:DKEY-164F24.2	si:dkey-164f24.2
ENSDARG00000001975	10	3.83924	HSD11B2	hydroxysteroid (11-beta) dehydrogenase 2
ENSDARG00000002204	10	37.6452	HSPB11	heat shock protein, alpha-crystallin-related, b11
ENSDARG00000003102	10	2.17323
ENSDARG00000003706	10	5.34206	RYR2B	ryanodine receptor 2b (cardiac)
ENSDARG00000005673	10	3.62532	F3B	coagulation factor IIIb
ENSDARG00000007241	10	7.42571	MYCB	v-myc avian myelocytomatosis viral oncogene homolog b
ENSDARG00000009341	10	10.631	NRAP	nebulin-related anchoring protein
ENSDARG00000018566	10	32.9627	FLNCA	filamin C, gamma a (actin binding protein 280)
ENSDARG00000020845	10	8.13339	TNS1B	tensin 1b
ENSDARG00000021987	10	9.08185	PLECB	plectin b
ENSDARG00000024746	10	8.89843	HSP90AA1.2	heat shock protein 90, alpha (cytosolic), class A member 1, tandem duplicate 2
ENSDARG00000026531	10	3.05097	ALCAMA	activated leukocyte cell adhesion molecule a
ENSDARG00000030514	10	2.37193	ACSL1A	acyl-CoA synthetase long-chain family member 1a
ENSDARG00000031756	10	3.89565	MEF2AA	myocyte enhancer factor 2aa
ENSDARG00000043182	10	2.00393	HHLA2A.1	HERV-H LTR-associating 2a, tandem duplicate 1
ENSDARG00000043313	10	2.41225	ANK2B	ankyrin 2b, neuronal
ENSDARG00000053484	10	5.4471	SYNE2B	spectrin repeat containing, nuclear envelope 2b
ENSDARG00000055075	10	4.07506	SVILA	supervillin a
ENSDARG00000055854	10	3.97788	NR4A3	nuclear receptor subfamily 4, group A, member 3
ENSDARG00000057317	10	3.45676	NEXN	nexilin (F actin binding protein)
ENSDARG00000058365	10	5.0543	HSPB8	heat shock protein b8
ENSDARG00000058688	10	3.77533
ENSDARG00000059054	10	5.74532	PDK2B	pyruvate dehydrogenase kinase, isozyme 2b
ENSDARG00000061764	10	7.79335	AHNAK	AHNAK nucleoprotein
ENSDARG00000062350	10	5.07514	SYNM	synemin, intermediate filament protein
ENSDARG00000062590	10	2.75425	PLECA	plectin a
ENSDARG00000069608	10	5.58843	PALM2	paralemmin 2
ENSDARG00000076821	10	3.02837
ENSDARG00000079564	10	82.4304	VMHC	ventricular myosin heavy chain
ENSDARG00000079782	10	196.871	VMHCL	ventricular myosin heavy chain-like
ENSDARG00000086230	10	4.95937
ENSDARG00000089913	10	2.34299	CACNA1G	calcium channel, voltage-dependent, T type, alpha 1G subunit
ENSDARG00000000103	10	4.91997	MYH10	myosin, heavy chain 10, non-muscle
ENSDARG00000000563	10	96.1609	TTNB	titin b
ENSDARG00000000779	10	2.34299	SCFD1	sec1 family domain containing 1
ENSDARG00000007412	10	4.58763	SLC2A1B	solute carrier family 2 (facilitated glucose transporter), member 1b
ENSDARG00000007836	10	6.08497	CTSLA	cathepsin La
ENSDARG00000008398	10	3.09102	CACNA1C	calcium channel, voltage-dependent, L type, alpha 1C subunit
ENSDARG00000009106	10	3.83924	SERINC1	serine incorporator 1
ENSDARG00000010085	10	2.34299	P4HA2	procollagen-proline, 2-oxoglutarate 4-dioxygenase (proline 4-hydroxylase), alpha polypeptide 2
ENSDARG00000010625	10	6.72965	CLIC2	chloride intracellular channel 2
ENSDARG00000013422	10	12.0817	SLC8A1A	solute carrier family 8 (sodium/calcium exchanger), member 1a
ENSDARG00000014215	10	3.09102	CDH13	cadherin 13, H-cadherin (heart)
ENSDARG00000017246	10	3.05684	PRX	periaxin
ENSDARG00000017602	10	3.64282	CCNG2	cyclin G2
ENSDARG00000018693	10	4.62575	CDH2	cadherin 2, type 1, N-cadherin (neuronal)
ENSDARG00000021195	10	6.08497	ST8SIA6	ST8 alpha-N-acetyl-neuraminide alpha-2,8-sialyltransferase 6
ENSDARG00000022101	10	4.2454	OBSCNB	obscurin, cytoskeletal calmodulin and titin-interacting RhoGEF b
ENSDARG00000022904	10	2.33794	SKILB	SKI-like proto-oncogene b
ENSDARG00000023062	10	8.74667	CYR61	cysteine-rich, angiogenic inducer, 61
ENSDARG00000023472	10	3.09102	CTNNB2	catenin, beta 2
ENSDARG00000028213	10	155.935	TTNA	titin a
ENSDARG00000028533	10	3.77419	MACF1A	microtubule-actin crosslinking factor 1a
ENSDARG00000028786	10	2.34299	CHST12A	carbohydrate (chondroitin 4) sulfotransferase 12a
ENSDARG00000029072	10	12.2742	KLF6A	Kruppel-like factor 6a
ENSDARG00000029931	10	2.34299	ATP13A1	ATPase type 13A1
ENSDARG00000030722	10	27.3829	XIRP1	xin actin binding repeat containing 1
ENSDARG00000031228	10	3.30739	PODXL	podocalyxin-like
ENSDARG00000031720	10	5.33621	CLSTN1	calsyntenin 1
ENSDARG00000032049	10	2.16554	ENAH	enabled homolog (Drosophila)
ENSDARG00000039041	10	2.34299	SFRP5	secreted frizzled-related protein 5
ENSDARG00000039576	10	8.06858	FSTL1B	follistatin-like 1b
ENSDARG00000041575	10	2.34299	TRMT10C	tRNA methyltransferase 10C, mitochondrial RNase P subunit
ENSDARG00000044395	10	4.95937
ENSDARG00000045180	10	17.7114	ACTA2	actin, alpha 2, smooth muscle, aorta
ENSDARG00000045803	10	2.34299	MFGE8B	milk fat globule-EGF factor 8 protein b
ENSDARG00000045864	10	12.4102	LMOD2B	leiomodin 2 (cardiac) b
ENSDARG00000052948	10	2.34299	ZGC:195023	zgc:195023
ENSDARG00000052958	10	91.8969	NPPB	natriuretic peptide B
ENSDARG00000052960	10	79.5994	NPPA	natriuretic peptide A
ENSDARG00000054864	10	9.08185	APLP2	amyloid beta (A4) precursor-like protein 2
ENSDARG00000055412	10	2.64798	MYLK4B	myosin light chain kinase family, member 4b
ENSDARG00000055543	10	3.83924	APPB	amyloid beta (A4) precursor protein b
ENSDARG00000056075	10	3.83924	RCA2.1	regulator of complement activation group 2 gene 1
ENSDARG00000057644	10	3.83924	ADAM8B	ADAM metallopeptidase domain 8b
ENSDARG00000058221	10	2.34299	UGCG	UDP-glucose ceramide glucosyltransferase
ENSDARG00000059712	10	3.09102	SLC19A2	solute carrier family 19 (thiamine transporter), member 2
ENSDARG00000059950	10	2.34299	PLXDC2	plexin domain containing 2
ENSDARG00000060457	10	5.74571	PMP22B	peripheral myelin protein 22b
ENSDARG00000060796	10	7.58305	SLC20A2	solute carrier family 20 (phosphate transporter), member 2
ENSDARG00000061737	10	2.34299	ECE1	endothelin converting enzyme 1
ENSDARG00000068572	10	6.08497	SLC16A1B	solute carrier family 16 (monocarboxylate transporter), member 1b
ENSDARG00000070208	10	3.09102
ENSDARG00000070212	10	554.957
ENSDARG00000070961	10	3.09102	LEPR	leptin receptor
ENSDARG00000070973	10	2.34299
ENSDARG00000076075	10	5.62162	MYH7BA	myosin, heavy chain 7B, cardiac muscle, beta a
ENSDARG00000076787	10	3.09102	ANGPT4	angiopoietin 4
ENSDARG00000077083	10	3.09102	AVPR1AA	arginine vasopressin receptor 1Aa
ENSDARG00000077777	10	83.9579	TMSB4X	thymosin, beta 4 x
ENSDARG00000078989	10	4.06428	ALPK3A	alpha-kinase 3a
ENSDARG00000082180	10	8.33236
ENSDARG00000084962	10	43.7585
ENSDARG00000086100	10	3.09102
ENSDARG00000086881	10	6.38092
ENSDARG00000087704	10	5.33621	GFRA3	GDNF family receptor alpha 3
ENSDARG00000088673	10	25.6173
ENSDARG00000090096	10	4.58763
ENSDARG00000090174	10	43.7585
ENSDARG00000090375	10	5.24612
ENSDARG00000090408	10	3.09102	ERBB4_(1_OF_MANY)	erb-b2 receptor tyrosine kinase 4
ENSDARG00000090618	10	3.09102	MALRD1	MAM and LDL receptor class A domain containing 1
ENSDARG00000090732	10	9.08185
ENSDARG00000091061	10	3.09102	SLC38A3B	solute carrier family 38, member 3b
ENSDARG00000092035	10	3.09102	SI:CH211-156J16.1	si:ch211-156j16.1
ENSDARG00000096144	10	55.1516	SI:DKEY-196N19.8	si:dkey-196n19.8
ENSDARG00000096145	10	3.83924
ENSDARG00000096403	10	134.55	SI:DKEY-153M14.1	si:dkey-153m14.1
ENSDARG00000005891	10	3.33189	CYB5R3	cytochrome b5 reductase 3
ENSDARG00000007098	10	6.83392	ITM2BA	integral membrane protein 2Ba
ENSDARG00000007823	10	4.77652	ATF3	activating transcription factor 3
ENSDARG00000013968	10	4.35347	PSAP	prosaposin
ENSDARG00000015164	10	2.81176	MKNK2B	MAP kinase interacting serine/threonine kinase 2b
ENSDARG00000017474	10	3.18935	ZGC:110699	zgc:110699
ENSDARG00000019098	10	2.41652	CD82A	CD82 molecule a
ENSDARG00000020239	10	3.83531	LPIN1	lipin 1
ENSDARG00000021184	10	3.19854	RBFOX1L	RNA binding protein, fox-1 homolog (C. elegans) 1-like
ENSDARG00000036080	10	3.83924	CD81A	CD81 molecule a
ENSDARG00000041779	10	4.99859	TRDN	triadin
ENSDARG00000054578	10	3.09102	ARL6IP1	ADP-ribosylation factor-like 6 interacting protein 1
ENSDARG00000061579	10	3.09102	serpine	myosin Ic, paralog b
ENSDARG00000074378	10	8.94495	JUNBA	jun B proto-oncogene a
ENSDARG00000075564	10	3.21237	FAM13A	family with sequence similarity 13, member A
ENSDARG00000086201	10	4.78167
ENSDARG00000000796	10	5.59879	NR4A1	nuclear receptor subfamily 4, group A, member 1
ENSDARG00000005924	10	3.09102	SERPINA10A	serpin peptidase inhibitor, clade A (alpha-1 antiproteinase, antitrypsin), member 10a
ENSDARG00000009212	10	10.7809	PPIAA	peptidylprolyl isomerase Aa (cyclophilin A)
ENSDARG00000014967	10	9.08185	G6PCB	glucose-6-phosphatase b, catalytic subunit
ENSDARG00000015552	10	2.69441	PHACTR4A	phosphatase and actin regulator 4a
ENSDARG00000015887	10	12.0817	B2ML	beta-2-microglobulin, like
ENSDARG00000021193	10	4.05173	CORO1CB	coronin, actin binding protein, 1Cb
ENSDARG00000021924	10	8.89843	HSP70.3	heat shock cognate 70-kd protein, tandem duplicate 3
ENSDARG00000023217	10	6.13315	CREMA	cAMP responsive element modulator a
ENSDARG00000030490	10	2.30512	SPTB	spectrin, beta, erythrocytic
ENSDARG00000043531	10	9.95193	JUN	jun proto-oncogene
ENSDARG00000052658	10	2.41652	PPTC7B	PTC7 protein phosphatase homolog b
ENSDARG00000055723	10	30.4354	HSP70L	heat shock cognate 70-kd protein, like
ENSDARG00000058548	10	4.58763	BVES	blood vessel epicardial substance
ENSDARG00000063626	10	2.5484	DDX21	DEAD (Asp-Glu-Ala-Asp) box helicase 21
ENSDARG00000092362	10	43.9304	HSP70.2	heat shock cognate 70-kd protein, tandem duplicate 2
ENSDARG00000093549	10	9.08185	SEPP1A	selenoprotein P, plasma, 1a
ENSDARG00000059120	10	10.1628
ENSDARG00000011553	11	10.0662	ATP5F1	ATP synthase, H+ transporting, mitochondrial Fo complex, subunit B1
ENSDARG00000012688	11	3.43548	EIF1B	eukaryotic translation initiation factor 1B
ENSDARG00000015490	11	7.4395
ENSDARG00000028343	11	6.16341
ENSDARG00000028396	11	7.13483	FKBP5	FK506 binding protein 5
ENSDARG00000028546	11	3.15975	NDUFS1	NADH dehydrogenase (ubiquinone) Fe-S protein 1
ENSDARG00000041619	11	8.14465	GNB2L1	guanine nucleotide binding protein (G protein), beta polypeptide 2-like 1
ENSDARG00000044521	11	4.73456	EEF1B2	eukaryotic translation elongation factor 1 beta 2
ENSDARG00000052304	11	3.97874	UQCRC1	ubiquinol-cytochrome c reductase core protein I
ENSDARG00000054087	11	3.21237	IRS1	insulin receptor substrate 1
ENSDARG00000057147	11	2.30318
ENSDARG00000071090	11	33.46	ACTN2B	actinin, alpha 2b
ENSDARG00000082634	11	2.8511	SNORD72	Small nucleolar RNA SNORD72
ENSDARG00000083950	11	6.2255	SNOU83B	Small nucleolar RNA U83B
ENSDARG00000088030	11	8.84145	RPL35A	ribosomal protein L35a
ENSDARG00000010113	11	2.81176	NDUFB8	NADH dehydrogenase (ubiquinone) 1 beta subcomplex, 8
ENSDARG00000013623	11	9.68166	VDAC2	voltage-dependent anion channel 2
ENSDARG00000014313	11	8.6019	ATP5J	ATP synthase, H+ transporting, mitochondrial Fo complex, subunit F6
ENSDARG00000014690	11	10.8354	RPS4X	ribosomal protein S4, X-linked
ENSDARG00000020261	11	2.53435	RAB2A	RAB2A, member RAS oncogene family
ENSDARG00000020850	11	56.9045	EEF1A1L1	eukaryotic translation elongation factor 1 alpha 1, like 1
ENSDARG00000021838	11	6.2255	RPS23	ribosomal protein S23
ENSDARG00000022303	11	4.68368	HIGD1A	HIG1 hypoxia inducible domain family, member 1A
ENSDARG00000022456	11	8.52876	ENO1A	enolase 1a, (alpha)
ENSDARG00000023963	11	68.5096	TPM4A	tropomyosin 4a
ENSDARG00000034470	11	8.52876	ALDOAB	aldolase a, fructose-bisphosphate, b
ENSDARG00000035136	11	6.43414	SEPW1	selenoprotein W, 1
ENSDARG00000037860	11	6.51443	COX6B2	cytochrome c oxidase subunit VIb polypeptide 2
ENSDARG00000038608	11	2.5896	SDHC	succinate dehydrogenase complex, subunit C, integral membrane protein
ENSDARG00000045279	11	2.81176
ENSDARG00000055475	11	3.92563	RPS27.2	ribosomal protein S27, isoform 2
ENSDARG00000056008	11	8.25084	ATP5G1	ATP synthase, H+ transporting, mitochondrial Fo complex, subunit C1 (subunit 9)
ENSDARG00000060797	11	3.29998	PFKMB	phosphofructokinase, muscle b
ENSDARG00000068940	11	8.26231	ATP5IB	ATP synthase, H+ transporting, mitochondrial Fo complex, subunit Eb
ENSDARG00000069464	11	7.05439	COX7A1	cytochrome c oxidase subunit VIIa polypeptide 1 (muscle)
ENSDARG00000074552	11	2.68519	NDUFS7	NADH dehydrogenase (ubiquinone) Fe-S protein 7, (NADH-coenzyme Q reductase)
ENSDARG00000079578	11	8.52519	RBPMS2B	RNA binding protein with multiple splicing 2b
ENSDARG00000092873	11	5.92024	ZGC:193541	zgc:193541
ENSDARG00000003109	11	4.37527	RCAN1A	regulator of calcineurin 1a
ENSDARG00000003695	11	3.54264	VDAC3	voltage-dependent anion channel 3
ENSDARG00000003795	11	23.3411	IDH2	isocitrate dehydrogenase (NADP(+)) 2, mitochondrial
ENSDARG00000003933	11	7.95465
ENSDARG00000005423	11	4.03333	PGAM1A	phosphoglycerate mutase 1a
ENSDARG00000005513	11	3.15975	NACA	nascent polypeptide-associated complex alpha subunit
ENSDARG00000005578	11	2.13249	UGP2A	UDP-glucose pyrophosphorylase 2a
ENSDARG00000006399	11	2.24634	YWHAE1	tyrosine 3-monooxygenase/tryptophan 5-monooxygenase activation protein, epsilon polypeptide 1
ENSDARG00000007745	11	3.33189	UQCRFS1	ubiquinol-cytochrome c reductase, Rieske iron-sulfur polypeptide 1
ENSDARG00000008030	11	8.11052	MYL9B	myosin, light chain 9b, regulatory
ENSDARG00000008982	11	5.70815	CASQ2	calsequestrin 2
ENSDARG00000011665	11	38.0006	ALDOAA	aldolase a, fructose-bisphosphate, a
ENSDARG00000013078	11	3.03529	YWHABA	tyrosine 3-monooxygenase/tryptophan 5-monooxygenase activation protein, beta polypeptide a
ENSDARG00000014867	11	15.8449	RPL8	ribosomal protein L8
ENSDARG00000015050	11	6.2255	CALM3A	calmodulin 3a (phosphorylase kinase, delta)
ENSDARG00000016160	11	2.41643	GMPR	guanosine monophosphate reductase
ENSDARG00000016875	11	2.15628	GYS1	glycogen synthase 1 (muscle)
ENSDARG00000019096	11	139.587	MYL7	myosin, light chain 7, regulatory
ENSDARG00000019202	11	20.566
ENSDARG00000019881	11	3.03908	BSG	basigin
ENSDARG00000020153	11	11.2202
ENSDARG00000020876	11	5.07514	PDK2A	pyruvate dehydrogenase kinase, isozyme 2a
ENSDARG00000021059	11	3.94271	ALAS1	aminolevulinate, delta-, synthase 1
ENSDARG00000021124	11	6.50427	CFL1	cofilin 1
ENSDARG00000022995	11	2.83599	CLIC4	chloride intracellular channel 4
ENSDARG00000025635	11	12.3751
ENSDARG00000029064	11	6.2255	UQCRQ	ubiquinol-cytochrome c reductase, complex III subunit VII
ENSDARG00000029688	11	28.9251	HSP70.1	heat shock cognate 70-kd protein, tandem duplicate 1
ENSDARG00000030053	11	2.5484	EEF1DB	eukaryotic translation elongation factor 1 delta b (guanine nucleotide exchange protein)
ENSDARG00000032970	11	12.3751	COX4I1	cytochrome c oxidase subunit IV isoform 1
ENSDARG00000032976	11	102.069	CMLC1	cardiac myosin light chain-1
ENSDARG00000033201	11	3.86851	CRIP2	zgc:101840
ENSDARG00000033738	11	2.26831	ZGC:153867	zgc:153867
ENSDARG00000035860	11	8.26831	RPS28	ribosomal protein S28
ENSDARG00000035990	11	5.61919	CITED4A	Cbp/p300-interacting transactivator, with Glu/Asp-rich carboxy-terminal domain, 4a
ENSDARG00000036329	11	3.75757	NDUFA1	NADH dehydrogenase (ubiquinone) 1 alpha subcomplex, 1
ENSDARG00000038075	11	3.15464	CYC1	cytochrome c-1
ENSDARG00000038076	11	3.52797	ROMO1	reactive oxygen species modulator 1
ENSDARG00000038123	11	6.92301	MYL9A	myosin, light chain 9a, regulatory
ENSDARG00000038577	11	10.0111	COX6C	cytochrome c oxidase subunit VIc
ENSDARG00000038900	11	5.50765	ACADM	acyl-CoA dehydrogenase, C-4 to C-12 straight chain
ENSDARG00000039007	11	17.1503	ENO3	enolase 3, (beta, muscle)
ENSDARG00000039929	11	3.93586	CKMT2B	creatine kinase, mitochondrial 2b (sarcomeric)
ENSDARG00000040128	11	2.15628
ENSDARG00000040856	11	8.69644
ENSDARG00000040988	11	8.26231	TPI1B	triosephosphate isomerase 1b
ENSDARG00000042133	11	3.18895	SI:DKEY-51E6.1	si:dkey-51e6.1
ENSDARG00000042620	11	3.89565	GSTR	glutathione S-transferase rho
ENSDARG00000042931	11	4.69188
ENSDARG00000043257	11	5.4585	CKBB	creatine kinase, brain b
ENSDARG00000043371	11	17.1267	MDH2	malate dehydrogenase 2, NAD (mitochondrial)
ENSDARG00000044092	11	3.89565	ATPIF1B	ATPase inhibitory factor 1b
ENSDARG00000045408	11	17.1149	TAGLN	transgelin
ENSDARG00000052690	11	2.38514	ARRDC3A	arrestin domain containing 3a
ENSDARG00000053047	11	2.84204	EIF2S2	eukaryotic translation initiation factor 2, subunit 2 beta
ENSDARG00000053136	11	13.8282	B2M	beta-2-microglobulin
ENSDARG00000053382	11	6.98218
ENSDARG00000054191	11	6.71347	PGK1	phosphoglycerate kinase 1
ENSDARG00000054597	11	2.36513	CNOT6L	CCR4-NOT transcription complex, subunit 6-like
ENSDARG00000054907	11	2.53256	COX7A3	cytochrome c oxidase subunit VIIa polypeptide 3
ENSDARG00000055618	11	35.7725	ACTA1B	actin, alpha 1b, skeletal muscle
ENSDARG00000055632	11	2.68519	SMTNL	smoothelin, like
ENSDARG00000057497	11	3.5381	STK35L	serine/threonine kinase 35, like
ENSDARG00000057556	11	8.26831	RPL17	ribosomal protein L17
ENSDARG00000057571	11	2.70641	PGAM2	phosphoglycerate mutase 2 (muscle)
ENSDARG00000059128	11	3.71612	UQCRH	ubiquinol-cytochrome c reductase hinge protein
ENSDARG00000059654	11	3.15975	EIF3BA	eukaryotic translation initiation factor 3, subunit Ba
ENSDARG00000062359	11	3.16276	SCN3B	sodium channel, voltage-gated, type III, beta
ENSDARG00000068385	11	2.36933
ENSDARG00000068436	11	2.36513	H3F3B.1	H3 histone, family 3B.1
ENSDARG00000070426	11	4.95937	CHAC1	ChaC, cation transport regulator homolog 1 (E. coli)
ENSDARG00000071691	11	3.29299	UQCRC2B	ubiquinol-cytochrome c reductase core protein IIb
ENSDARG00000075990	11	4.51707	ACAP3A	ArfGAP with coiled-coil, ankyrin repeat and PH domains 3a
ENSDARG00000076126	11	21.8522	ACTC1_(1_OF_MANY)	si:ch73-187m15.4
ENSDARG00000076241	11	3.96166	TXLNBB	taxilin beta b
ENSDARG00000076667	11	8.06355	CCNG1	cyclin G1
ENSDARG00000076892	11	24.7576
ENSDARG00000077236	11	11.5149	HSPB6	heat shock protein, alpha-crystallin-related, b6
ENSDARG00000087188	11	5.84196	NFIL3-6	nuclear factor, interleukin 3 regulated, member 6
ENSDARG00000092553	11	7.00124	SLC25A5	solute carrier family 25 (mitochondrial carrier; adenine nucleotide translocator), member 5
ENSDARG00000095921	11	4.06869	SI:CH1073-325M22.2	si:ch1073-325m22.2
ENSDARG00000001788	11	11.99	ATP5O	ATP synthase, H+ transporting, mitochondrial F1 complex, O subunit
ENSDARG00000009447	11	19.7092	ATP5G3B	ATP synthase, H+ transporting, mitochondrial F0 complex, subunit c3 (subunit 9) b
ENSDARG00000010149	11	14.6874	ATP5A1	ATP synthase, H+ transporting, mitochondrial F1 complex, alpha subunit 1, cardiac muscle
ENSDARG00000010160	11	9.29727	RPS15A	ribosomal protein S15a
ENSDARG00000011841	11	10.4507	ATP5L	ATP synthase, H+ transporting, mitochondrial F0 complex, subunit g
ENSDARG00000012244	11	2.75598	UBE2E3	ubiquitin-conjugating enzyme E2E 3 (UBC4/5 homolog, yeast)
ENSDARG00000017235	11	6.99288	EIF5A	eukaryotic translation initiation factor 5A
ENSDARG00000017772	11	20.4832	MDH1AA	malate dehydrogenase 1Aa, NAD (soluble)
ENSDARG00000019644	11	12.8677	LDHBA	lactate dehydrogenase Ba
ENSDARG00000021346	11	5.84196	PDHB	pyruvate dehydrogenase (lipoamide) beta
ENSDARG00000025566	11	11.6051	SLC25A3B	solute carrier family 25 (mitochondrial carrier; phosphate carrier), member 3b
ENSDARG00000027600	11	3.9645	PDLIM5B	PDZ and LIM domain 5b
ENSDARG00000030408	11	7.76063	RPS26L	ribosomal protein S26, like
ENSDARG00000031952	11	96.2769	MB	myoglobin
ENSDARG00000035327	11	31.7497	CKMA	creatine kinase, muscle a
ENSDARG00000037266	11	6.50545	MYOZ2B	myozenin 2b
ENSDARG00000042469	11	3.12055	NDUFA12	NADH dehydrogenase (ubiquinone) 1 alpha subcomplex, 12
ENSDARG00000043643	11	2.47397	EHBP1	EH domain binding protein 1
ENSDARG00000053058	11	9.37593	RPS11	ribosomal protein S11
ENSDARG00000053291	11	14.0241	PNRC2	proline-rich nuclear receptor coactivator 2
ENSDARG00000056108	11	7.76063	NDUFA4	NADH dehydrogenase (ubiquinone) 1 alpha subcomplex, 4
ENSDARG00000057911	11	31.3349	ACTC1_(1_OF_MANY)	zgc:86709
ENSDARG00000058128	11	7.21553	MSNA	moesin a
ENSDARG00000058603	11	3.15975	JPH1A	junctophilin 1a
ENSDARG00000068995	11	2.15628
ENSDARG00000070083	11	31.7497	ATP5B	ATP synthase, H+ transporting, mitochondrial F1 complex, beta polypeptide
ENSDARG00000070914	11	3.4411	DUSP6	dual specificity phosphatase 6
ENSDARG00000078842	11	3.52797	TNS1A	tensin 1a
ENSDARG00000087303	11	3.51567	CEBPD	CCAAT/enhancer binding protein (C/EBP), delta
ENSDARG00000095351	11	146.677	SI:CH73-308B14.1	si:ch73-308b14.1
ENSDARG00000015551	11	9.68166	FTH1A	ferritin, heavy polypeptide 1a
ENSDARG00000020544	11	2.04371	REM1	RAS (RAD and GEM)-like GTP-binding 1
ENSDARG00000020610	11	49.3944	TNNT2A	troponin T type 2a (cardiac)
ENSDARG00000023290	11	11.6992	FABP3	fatty acid binding protein 3, muscle and heart
ENSDARG00000026801	11	6.72944	STAU2	staufen double-stranded RNA binding protein 2
ENSDARG00000051783	11	21.2576	RPLP0	ribosomal protein, large, P0
ENSDARG00000056141	11	4.17716	COQ10B	coenzyme Q10B
ENSDARG00000011201	12	10.8354	RPLP2L	ribosomal protein, large P2, like
ENSDARG00000029533	12	8.52876	RPL18	ribosomal protein L18
ENSDARG00000045051	12	3.14108	SLC16A3	solute carrier family 16 (monocarboxylate transporter), member 3
ENSDARG00000054817	12	2.84204
ENSDARG00000056499	12	4.21406	CA6	carbonic anhydrase VI
ENSDARG00000058041	12	3.59145	NDUFA8	NADH dehydrogenase (ubiquinone) 1 alpha subcomplex, 8
ENSDARG00000078696	12	7.58283	SYNPO2LB	synaptopodin 2-like b
ENSDARG00000025428	13	22.9104	SOCS3A	suppressor of cytokine signaling 3a
ENSDARG00000001803	13	3.53174	KCNH6A	potassium voltage-gated channel, subfamily H (eag-related), member 6a
ENSDARG00000002271	13	3.78772	ZFAND5B	zinc finger, AN1-type domain 5b
ENSDARG00000006497	13	3.83924	RTN1A	reticulon 1a
ENSDARG00000009830	13	4.62575	HDLBPA	high density lipoprotein binding protein a
ENSDARG00000018524	13	3.99806	MIDN	midnolin
ENSDARG00000019181	13	8.91297	RPSA	ribosomal protein SA
ENSDARG00000020197	13	3.36493	RPL5A	ribosomal protein L5a
ENSDARG00000020298	13	16.5128	BTG2	B-cell translocation gene 2
ENSDARG00000027009	13	2.75598	ZGC:85777	zgc:85777
ENSDARG00000031164	13	4.27043	TUBA8L2	tubulin, alpha 8 like 2
ENSDARG00000031683	13	93.8471	FOSAB	v-fos FBJ murine osteosarcoma viral oncogene homolog Ab
ENSDARG00000034897	13	6.16042	RPS10	ribosomal protein S10
ENSDARG00000036588	13	5.44894	MHC1ZBA	major histocompatibility complex class I ZBA
ENSDARG00000043509	13	6.28093	RPL11	ribosomal protein L11
ENSDARG00000043795	13	2.5896	ARHGDIA	Rho GDP dissociation inhibitor (GDI) alpha
ENSDARG00000056322	13	3.71421	LDB3A	LIM domain binding 3a
ENSDARG00000057128	13	3.21237	HADHAA	hydroxyacyl-CoA dehydrogenase/3-ketoacyl-CoA thiolase/enoyl-CoA hydratase (trifunctional protein), alpha subunit a
ENSDARG00000058693	13	2.86545	CAST	calpastatin
ENSDARG00000078293	13	5.4585
ENSDARG00000012388	13	9.32606	COX4I1L	cytochrome c oxidase subunit IV isoform 1, like
ENSDARG00000067848	13	5.40093	NMRK2	nicotinamide riboside kinase 2
ENSDARG00000006691	13	4.18166	RPL12	ribosomal protein L12
ENSDARG00000069975	13	10.1653
ENSDARG00000002344	14	5.24682	TUBB4B	tubulin, beta 4B class IVb
ENSDARG00000002369	14	8.94495
ENSDARG00000003016	14	22.0324
ENSDARG00000007294	14	3.6457	ACO2	aconitase 2, mitochondrial
ENSDARG00000011538	14	21.2576
ENSDARG00000011615	14	26.2918	MYBPC3	myosin binding protein C, cardiac
ENSDARG00000012409	14	2.86545	RNF207B	ring finger protein 207b
ENSDARG00000012987	14	2.77696	GPIA	glucose-6-phosphate isomerase a
ENSDARG00000013317	14	2.50578	PYGMB	phosphorylase, glycogen, muscle b
ENSDARG00000016687	14	10.2651	ACADVL	acyl-CoA dehydrogenase, very long chain
ENSDARG00000017049	14	2.15628	ADSL	adenylosuccinate lyase
ENSDARG00000019404	14	5.4585	ATP5D	ATP synthase, H+ transporting, mitochondrial F1 complex, delta subunit
ENSDARG00000019778	14	6.2255	RPS6	ribosomal protein S6
ENSDARG00000020107	14	2.86545	USP2A	ubiquitin specific peptidase 2a
ENSDARG00000021979	14	2.15628	MICAL3A	microtubule associated monooxygenase, calponin and LIM domain containing 3a
ENSDARG00000022438	14	3.11486	COX6A1	cytochrome c oxidase subunit VIa polypeptide 1
ENSDARG00000024276	14	2.39425	PCBP4	poly(rC) binding protein 4
ENSDARG00000025147	14	9.28085	CD63	CD63 molecule
ENSDARG00000026766	14	4.27842	BCL2L10	BCL2-like 10 (apoptosis facilitator)
ENSDARG00000028000	14	2.15628	PFKPA	phosphofructokinase, platelet a
ENSDARG00000028027	14	6.95225	TRIM63A	tripartite motif containing 63a
ENSDARG00000029439	14	17.3993	ATP2A2A	ATPase, Ca++ transporting, cardiac muscle, slow twitch 2a
ENSDARG00000031698	14	2.24846	MYLK2	myosin light chain kinase 2
ENSDARG00000035256	14	7.75369	EEF2L2	eukaryotic translation elongation factor 2, like 2
ENSDARG00000036371	14	35.4612	ACTA1A	actin, alpha 1a, skeletal muscle
ENSDARG00000039452	14	2.63764	HK1	hexokinase 1
ENSDARG00000039914	14	8.13029	GAPDHS	glyceraldehyde-3-phosphate dehydrogenase, spermatogenic
ENSDARG00000041065	14	23.2299	HSPB1	heat shock protein, alpha-crystallin-related, 1
ENSDARG00000041068	14	3.15712	GOT2A	glutamic-oxaloacetic transaminase 2a, mitochondrial
ENSDARG00000041182	14	10.0662	RPL4	ribosomal protein L4
ENSDARG00000041589	14	3.92563	ADPRHL1	ADP-ribosylhydrolase like 1
ENSDARG00000042247	14	5.84196
ENSDARG00000042535	14	74.0353	ACTC1A	actin, alpha, cardiac muscle 1a
ENSDARG00000045230	14	6.16042	COX6B1	cytochrome c oxidase subunit VIb polypeptide 1
ENSDARG00000045302	14	5.73168	SMPX	small muscle protein, X-linked
ENSDARG00000045514	14	7.76063	ATP5C1	ATP synthase, H+ transporting, mitochondrial F1 complex, gamma polypeptide 1
ENSDARG00000052708	14	25.5237	TNNI1B	troponin I type 1b (skeletal, slow)
ENSDARG00000053222	14	2.96214	ASB5B	ankyrin repeat and SOCS box containing 5b
ENSDARG00000056856	14	2.86545	TAX1BP1B	Tax1 (human T-cell leukemia virus type I) binding protein 1b
ENSDARG00000058656	14	15.3708	DESMA	desmin a
ENSDARG00000059259	14	7.45058	PABPC4	poly(A) binding protein, cytoplasmic 4 (inducible form)
ENSDARG00000062236	14	9.32606
ENSDARG00000068738	14	7.80577	COX5B2	cytochrome c oxidase subunit Vb 2
ENSDARG00000068992	14	17.0032	HSPA8	heat shock protein 8
ENSDARG00000069404	14	21.0918	PLN	phospholamban
ENSDARG00000069615	14	2.60134	CKMT2A	creatine kinase, mitochondrial 2a (sarcomeric)
ENSDARG00000071498	14	13.5077	FHL1A	four and a half LIM domains 1a
ENSDARG00000074120	14	3.05097	USP2B	ubiquitin specific peptidase 2b
ENSDARG00000075914	14	3.31834	KCNJ14	potassium inwardly-rectifying channel, subfamily J, member 14
ENSDARG00000079198	14	4.99859	USP13	ubiquitin specific peptidase 13 (isopeptidase T-3)
ENSDARG00000079230	14	17.5297
ENSDARG00000086746	14	2.28076	SI:CH73-209E20.3	si:ch73-209e20.3
ENSDARG00000087665	14	10.7865
ENSDARG00000089086	14	8.90678	MUSTN1	musculoskeletal, embryonic nuclear protein 1
ENSDARG00000092649	14	3.15975
ENSDARG00000092693	14	3.54264	TPT1	tumor protein, translationally-controlled 1
ENSDARG00000094815	14	4.73456	SI:CH73-49P17.1	si:ch73-49p17.1
ENSDARG00000095765	14	3.14108	SI:CH1073-221C23.2	si:ch1073-221c23.2
ENSDARG00000052011	14	3.02929	RRAD	Ras-related associated with diabetes
ENSDARG00000013144	14	8.40244	ATP1B1A	ATPase, Na+/K+ transporting, beta 1a polypeptide
ENSDARG00000054588	14	9.37593	COX6A2	cytochrome c oxidase subunit VIa polypeptide 2

## Sheet: module 1
Category	Term	Count	%	PValue	Genes	List Total	Pop Hits	Pop Total	Fold Enrichment	Bonferroni	Benjamini	FDR
GOTERM_BP_DIRECT	GO:0055114~oxidation-reduction process	11	35.4839	6.005e-08	140541, 140532, 140540, 140531, 140534, 140533, 140536, 140535, 140538, 140512, 140539	28	616	14912	9.5102	4.62384e-06	4.62384e-06	6.33563e-05
GOTERM_BP_DIRECT	GO:0042773~ATP synthesis coupled electron transport	4	12.9032	1.0549e-07	140540, 140534, 140535, 140538	28	6	14912	355.048	8.12273e-06	4.06137e-06	0.000111299
GOTERM_BP_DIRECT	GO:0006810~transport	13	41.9355	1.83084e-07	140520, 447923, 140519, 140532, 140540, 140531, 140534, 140533, 140536, 140535, 140538, 140512, 140539	28	1120	14912	6.18163	1.40973e-05	4.69914e-06	0.000193164
GOTERM_BP_DIRECT	GO:0032496~response to lipopolysaccharide	3	9.67742	0.00366577	678622, 101883610, 114447	28	50	14912	31.9543	0.246316	0.0682546	3.8006
GOTERM_BP_DIRECT	GO:0022904~respiratory electron transport chain	2	6.45161	0.0126082	140541, 140512	28	7	14912	152.163	0.623564	0.177496	12.5296
GOTERM_BP_DIRECT	GO:0006754~ATP biosynthetic process	2	6.45161	0.0143969	140520, 140519	28	8	14912	133.143	0.672614	0.169812	14.187
GOTERM_BP_DIRECT	GO:0006955~immune response	4	12.9032	0.0154979	30645, 678622, 101883610, 58113	28	293	14912	7.2706	0.699613	0.157863	15.193
GOTERM_BP_DIRECT	GO:0006120~mitochondrial electron transport, NADH to ubiquinone	2	6.45161	0.0161824	140532, 140534	28	9	14912	118.349	0.715276	0.145321	15.813
GOTERM_BP_DIRECT	GO:0048884~neuromast development	2	6.45161	0.0373671	30645, 58113	28	21	14912	50.7211	0.946731	0.278066	33.0885
GOTERM_BP_DIRECT	GO:0015986~ATP synthesis coupled proton transport	2	6.45161	0.0460637	140520, 140519	28	26	14912	40.967	0.973516	0.304497	39.1981
GOTERM_BP_DIRECT	GO:0015992~proton transport	2	6.45161	0.0546847	140520, 140519	28	31	14912	34.3594	0.986836	0.325415	44.7516
GOTERM_BP_DIRECT	GO:0048839~inner ear development	2	6.45161	0.0598213	30645, 58113	28	34	14912	31.3277	0.991346	0.326868	47.838
GOTERM_BP_DIRECT	GO:0006935~chemotaxis	2	6.45161	0.0851034	101883610, 114447	28	49	14912	21.7376	0.998939	0.409523	60.8752

## Sheet: module 5
Category	Term	Count	%	PValue	Genes	List Total	Pop Hits	Pop Total	Fold Enrichment	Bonferroni	Benjamini	FDR
GOTERM_BP_DIRECT	GO:0006412~translation	5	9.80392	0.00668199	ENSDARG00000008292, ENSDARG00000020893, ENSDARG00000035871, ENSDARG00000044093, ENSDARG00000053365	37	314	14912	6.41763	0.456704	0.456704	7.04838
GOTERM_BP_DIRECT	GO:0007507~heart development	3	5.88235	0.0692027	ENSDARG00000017219, ENSDARG00000029764, ENSDARG00000071113	37	179	14912	6.75464	0.998535	0.961726	54.2426

## Sheet: module 6
Category	Term	Count	%	PValue	Genes	List Total	Pop Hits	Pop Total	Fold Enrichment	Bonferroni	Benjamini	FDR
GOTERM_BP_DIRECT	GO:0006412~translation	38	44.7059	1.29802e-44	ENSDARG00000018334, ENSDARG00000010516, ENSDARG00000037071, ENSDARG00000025073, ENSDARG00000005791, ENSDARG00000023298, ENSDARG00000070849, ENSDARG00000029500, ENSDARG00000056119, ENSDARG00000036298, ENSDARG00000036316, ENSDARG00000058451, ENSDARG00000035692, ENSDARG00000041232, ENSDARG00000043453, ENSDARG00000016443, ENSDARG00000013307, ENSDARG00000042566, ENSDARG00000070437, ENSDARG00000077717,…	69	314	14912	26.1542	1.60954e-42	1.60954e-42	1.49888e-41
GOTERM_BP_DIRECT	GO:0043009~chordate embryonic development	11	12.9412	2.4839e-10	ENSDARG00000018334, ENSDARG00000035692, ENSDARG00000058105, ENSDARG00000041232, ENSDARG00000006413, ENSDARG00000005791, ENSDARG00000036629, ENSDARG00000042566, ENSDARG00000070849, ENSDARG00000058451, ENSDARG00000009779	69	126	14912	18.8673	3.08004e-08	1.54002e-08	2.86827e-07
GOTERM_BP_DIRECT	GO:0051726~regulation of cell cycle	8	9.41176	1.51094e-08	ENSDARG00000018334, ENSDARG00000007320, ENSDARG00000058105, ENSDARG00000041232, ENSDARG00000006316, ENSDARG00000042566, ENSDARG00000027744, ENSDARG00000068214	69	64	14912	27.0145	1.87356e-06	6.2452e-07	1.74474e-05
GOTERM_BP_DIRECT	GO:0000028~ribosomal small subunit assembly	5	5.88235	6.90594e-07	ENSDARG00000036629, ENSDARG00000043453, ENSDARG00000023298, ENSDARG00000070849, ENSDARG00000046157	69	16	14912	67.5362	8.56301e-05	2.14082e-05	0.000797457
GOTERM_BP_DIRECT	GO:0002181~cytoplasmic translation	5	5.88235	3.28016e-06	ENSDARG00000007320, ENSDARG00000070437, ENSDARG00000077717, ENSDARG00000009285, ENSDARG00000058451	69	23	14912	46.9817	0.000406658	8.13449e-05	0.00378768
GOTERM_BP_DIRECT	GO:0000027~ribosomal large subunit assembly	3	3.52941	0.00266606	ENSDARG00000006316, ENSDARG00000040439, ENSDARG00000058451	69	17	14912	38.1381	0.281819	0.0536779	3.0357
GOTERM_BP_DIRECT	GO:0000462~maturation of SSU-rRNA from tricistronic rRNA transcript (SSU-rRNA, 5.8S rRNA, LSU-rRNA)	3	3.52941	0.00668166	ENSDARG00000045487, ENSDARG00000039347, ENSDARG00000036629	69	27	14912	24.0129	0.56452	0.111977	7.44943
GOTERM_BP_DIRECT	GO:0030218~erythrocyte differentiation	3	3.52941	0.0156866	ENSDARG00000018334, ENSDARG00000041232, ENSDARG00000023298	69	42	14912	15.4369	0.859219	0.21735	16.6878
GOTERM_BP_DIRECT	GO:0000463~maturation of LSU-rRNA from tricistronic rRNA transcript (SSU-rRNA, 5.8S rRNA, LSU-rRNA)	2	2.35294	0.035912	ENSDARG00000018334, ENSDARG00000007320	69	8	14912	54.029	0.989273	0.395825	34.4477
GOTERM_BP_DIRECT	GO:0030097~hemopoiesis	3	3.52941	0.0685184	ENSDARG00000013307, ENSDARG00000042566, ENSDARG00000014230	69	94	14912	6.89732	0.999849	0.585274	55.9402
GOTERM_BP_DIRECT	GO:0006950~response to stress	2	2.35294	0.0832242	ENSDARG00000029150, ENSDARG00000027744	69	19	14912	22.749	0.999979	0.624506	63.3363
GOTERM_BP_DIRECT	GO:0048821~erythrocyte development	2	2.35294	0.0874101	ENSDARG00000041232, ENSDARG00000036629	69	20	14912	21.6116	0.999988	0.611389	65.2235

## Sheet: module 10
Category	Term	Count	%	PValue	Genes	List Total	Pop Hits	Pop Total	Fold Enrichment	Bonferroni	Benjamini	FDR
GOTERM_BP_DIRECT	GO:0048739~cardiac muscle fiber development	4	2.89855	3.97092e-06	ENSDARG00000021184, ENSDARG00000057317, ENSDARG00000000563, ENSDARG00000028213	112	5	14912	106.514	0.00125403	0.00125403	0.00534824
GOTERM_BP_DIRECT	GO:0060047~heart contraction	7	5.07246	6.50389e-06	ENSDARG00000074378, ENSDARG00000045180, ENSDARG00000034270, ENSDARG00000058548, ENSDARG00000041779, ENSDARG00000039486, ENSDARG00000028213	112	62	14912	15.0323	0.00205312	0.00102709	0.00875964
GOTERM_BP_DIRECT	GO:0007519~skeletal muscle tissue development	6	4.34783	2.76966e-05	ENSDARG00000062590, ENSDARG00000021987, ENSDARG00000058548, ENSDARG00000000563, ENSDARG00000039486, ENSDARG00000028213	112	48	14912	16.6429	0.00871405	0.00291316	0.0372977
GOTERM_BP_DIRECT	GO:0030239~myofibril assembly	4	2.89855	0.00220899	ENSDARG00000022101, ENSDARG00000021987, ENSDARG00000045864, ENSDARG00000031756	112	35	14912	15.2163	0.502825	0.160294	2.93462
GOTERM_BP_DIRECT	GO:0050880~regulation of blood vessel size	3	2.17391	0.00237654	ENSDARG00000052948, ENSDARG00000052958, ENSDARG00000052960	112	10	14912	39.9429	0.528521	0.139616	3.15393
GOTERM_BP_DIRECT	GO:0007626~locomotory behavior	4	2.89855	0.00576706	ENSDARG00000062590, ENSDARG00000021987, ENSDARG00000039486, ENSDARG00000018566	112	49	14912	10.8688	0.839212	0.26259	7.49436
GOTERM_BP_DIRECT	GO:0010628~positive regulation of gene expression	3	2.17391	0.0105144	ENSDARG00000026531, ENSDARG00000045180, ENSDARG00000031756	112	21	14912	19.0204	0.964568	0.379458	13.2697
GOTERM_BP_DIRECT	GO:0051726~regulation of cell cycle	4	2.89855	0.0120352	ENSDARG00000074378, ENSDARG00000043531, ENSDARG00000015552, ENSDARG00000017602	112	64	14912	8.32143	0.978208	0.380149	15.048
GOTERM_BP_DIRECT	GO:0030036~actin cytoskeleton organization	4	2.89855	0.0153144	ENSDARG00000021193, ENSDARG00000015552, ENSDARG00000077777, ENSDARG00000030722	112	70	14912	7.60816	0.992378	0.418337	18.7682
GOTERM_BP_DIRECT	GO:0006816~calcium ion transport	4	2.89855	0.0153144	ENSDARG00000013422, ENSDARG00000008398, ENSDARG00000003706, ENSDARG00000089913	112	70	14912	7.60816	0.992378	0.418337	18.7682
GOTERM_BP_DIRECT	GO:0032870~cellular response to hormone stimulus	3	2.17391	0.0195585	ENSDARG00000074378, ENSDARG00000043531, ENSDARG00000077083	112	29	14912	13.7734	0.998053	0.464295	23.3592
GOTERM_BP_DIRECT	GO:0045214~sarcomere organization	3	2.17391	0.0221863	ENSDARG00000013422, ENSDARG00000000563, ENSDARG00000028213	112	31	14912	12.8848	0.999166	0.47509	26.0802
GOTERM_BP_DIRECT	GO:0006941~striated muscle contraction	2	1.44928	0.0294468	ENSDARG00000000563, ENSDARG00000028213	112	4	14912	66.5714	0.999921	0.544827	33.1402
GOTERM_BP_DIRECT	GO:0007155~cell adhesion	7	5.07246	0.0315329	ENSDARG00000026531, ENSDARG00000018693, ENSDARG00000003046, ENSDARG00000058548, ENSDARG00000014215, ENSDARG00000014571, ENSDARG00000031228	112	318	14912	2.93082	0.99996	0.54106	35.05
GOTERM_BP_DIRECT	GO:0051591~response to cAMP	2	1.44928	0.0366732	ENSDARG00000074378, ENSDARG00000043531	112	5	14912	53.2571	0.999993	0.569723	39.5426
GOTERM_BP_DIRECT	GO:0014866~skeletal myofibril assembly	2	1.44928	0.0366732	ENSDARG00000058548, ENSDARG00000000563	112	5	14912	53.2571	0.999993	0.569723	39.5426
GOTERM_BP_DIRECT	GO:0006874~cellular calcium ion homeostasis	3	2.17391	0.0372938	ENSDARG00000013422, ENSDARG00000003706, ENSDARG00000029931	112	41	14912	9.74216	0.999994	0.550977	40.0651
GOTERM_BP_DIRECT	GO:0055003~cardiac myofibril assembly	2	1.44928	0.0438463	ENSDARG00000000563, ENSDARG00000028213	112	6	14912	44.381	0.999999	0.587502	45.3324
GOTERM_BP_DIRECT	GO:0045597~positive regulation of cell differentiation	2	1.44928	0.0438463	ENSDARG00000074378, ENSDARG00000043531	112	6	14912	44.381	0.999999	0.587502	45.3324
GOTERM_BP_DIRECT	GO:0034333~adherens junction assembly	2	1.44928	0.0438463	ENSDARG00000023472, ENSDARG00000014571	112	6	14912	44.381	0.999999	0.587502	45.3324
GOTERM_BP_DIRECT	GO:0030240~skeletal muscle thin filament assembly	2	1.44928	0.0509665	ENSDARG00000000563, ENSDARG00000028213	112	7	14912	38.0408	1	0.621815	50.568
GOTERM_BP_DIRECT	GO:0009314~response to radiation	2	1.44928	0.0509665	ENSDARG00000074378, ENSDARG00000043531	112	7	14912	38.0408	1	0.621815	50.568
GOTERM_BP_DIRECT	GO:0030241~skeletal muscle myosin thick filament assembly	2	1.44928	0.0509665	ENSDARG00000000563, ENSDARG00000028213	112	7	14912	38.0408	1	0.621815	50.568
GOTERM_BP_DIRECT	GO:0060026~convergent extension	3	2.17391	0.0514841	ENSDARG00000023472, ENSDARG00000014571, ENSDARG00000055543	112	49	14912	8.1516	1	0.604629	50.9299
GOTERM_BP_DIRECT	GO:0008360~regulation of cell shape	3	2.17391	0.0572297	ENSDARG00000023724, ENSDARG00000058548, ENSDARG00000000103	112	52	14912	7.68132	1	0.624742	54.7856
GOTERM_BP_DIRECT	GO:0010941~regulation of cell death	2	1.44928	0.0580341	ENSDARG00000074378, ENSDARG00000043531	112	8	14912	33.2857	1	0.611173	55.3025
GOTERM_BP_DIRECT	GO:0007398~ectoderm development	2	1.44928	0.0580341	ENSDARG00000018693, ENSDARG00000014571	112	8	14912	33.2857	1	0.611173	55.3025
GOTERM_BP_DIRECT	GO:0021555~midbrain-hindbrain boundary morphogenesis	2	1.44928	0.0580341	ENSDARG00000023724, ENSDARG00000000103	112	8	14912	33.2857	1	0.611173	55.3025
GOTERM_BP_DIRECT	GO:0007015~actin filament organization	3	2.17391	0.0591926	ENSDARG00000003046, ENSDARG00000077777, ENSDARG00000045864	112	53	14912	7.53639	1	0.600746	56.0372
GOTERM_BP_DIRECT	GO:0055008~cardiac muscle tissue morphogenesis	2	1.44928	0.0650495	ENSDARG00000000563, ENSDARG00000028213	112	9	14912	29.5873	1	0.619444	59.5838
GOTERM_BP_DIRECT	GO:0060070~canonical Wnt signaling pathway	3	2.17391	0.069344	ENSDARG00000023472, ENSDARG00000043531, ENSDARG00000039041	112	58	14912	6.8867	1	0.627445	62.0138
GOTERM_BP_DIRECT	GO:0034097~response to cytokine	2	1.44928	0.0720132	ENSDARG00000074378, ENSDARG00000043531	112	10	14912	26.6286	1	0.626205	63.4552
GOTERM_BP_DIRECT	GO:0070509~calcium ion import	2	1.44928	0.0720132	ENSDARG00000008398, ENSDARG00000089913	112	10	14912	26.6286	1	0.626205	63.4552
GOTERM_BP_DIRECT	GO:0009408~response to heat	2	1.44928	0.0925973	ENSDARG00000055723, ENSDARG00000024746	112	13	14912	20.4835	1	0.707185	72.9844
GOTERM_BP_DIRECT	GO:0048870~cell motility	2	1.44928	0.0925973	ENSDARG00000092035, ENSDARG00000056075	112	13	14912	20.4835	1	0.707185	72.9844
GOTERM_BP_DIRECT	GO:0006665~sphingolipid metabolic process	2	1.44928	0.0925973	ENSDARG00000009106, ENSDARG00000013968	112	13	14912	20.4835	1	0.707185	72.9844
GOTERM_BP_DIRECT	GO:0061386~closure of optic fissure	2	1.44928	0.0993576	ENSDARG00000015552, ENSDARG00000039041	112	14	14912	19.0204	1	0.719691	75.5729
GOTERM_BP_DIRECT	GO:0060038~cardiac muscle cell proliferation	2	1.44928	0.0993576	ENSDARG00000052958, ENSDARG00000052960	112	14	14912	19.0204	1	0.719691	75.5729

## Sheet: module 11
Category	Term	Count	%	PValue	Genes	List Total	Pop Hits	Pop Total	Fold Enrichment	Bonferroni	Benjamini	FDR
GOTERM_BP_DIRECT	GO:0015986~ATP synthesis coupled proton transport	9	6.56934	1.02e-11	ENSDARG00000056008, ENSDARG00000011553, ENSDARG00000070083, ENSDARG00000009447, ENSDARG00000068940, ENSDARG00000010149, ENSDARG00000014313, ENSDARG00000001788, ENSDARG00000011841	112	26	14912	46.0879	2.23379e-09	2.23379e-09	1.29744e-08
GOTERM_BP_DIRECT	GO:0006412~translation	19	13.8686	1.65422e-11	ENSDARG00000055475, ENSDARG00000020850, ENSDARG00000088030, ENSDARG00000044521, ENSDARG00000025566, ENSDARG00000092553, ENSDARG00000017235, ENSDARG00000053047, ENSDARG00000053058, ENSDARG00000021838, ENSDARG00000014867, ENSDARG00000059654, ENSDARG00000035860, ENSDARG00000010160, ENSDARG00000057556, ENSDARG00000030408, ENSDARG00000030053, ENSDARG00000014690, ENSDARG00000012688	112	314	14912	8.05641	3.62274e-09	1.81137e-09	2.10418e-08
GOTERM_BP_DIRECT	GO:0006096~glycolytic process	9	6.56934	1.45378e-10	ENSDARG00000034470, ENSDARG00000040988, ENSDARG00000011665, ENSDARG00000022456, ENSDARG00000060797, ENSDARG00000005423, ENSDARG00000039007, ENSDARG00000057571, ENSDARG00000054191	112	35	14912	34.2367	3.18377e-08	1.06126e-08	1.84921e-07
GOTERM_BP_DIRECT	GO:0006122~mitochondrial electron transport, ubiquinol to cytochrome c	5	3.64964	1.9743e-06	ENSDARG00000029064, ENSDARG00000038075, ENSDARG00000052304, ENSDARG00000059128, ENSDARG00000071691	112	13	14912	51.2088	0.000432278	0.000108087	0.00251129
GOTERM_BP_DIRECT	GO:0043009~chordate embryonic development	8	5.83942	4.26696e-05	ENSDARG00000055632, ENSDARG00000088030, ENSDARG00000051783, ENSDARG00000010160, ENSDARG00000029688, ENSDARG00000044092, ENSDARG00000023290, ENSDARG00000014690	112	126	14912	8.45351	0.00930131	0.00186722	0.0542624
GOTERM_BP_DIRECT	GO:0015992~proton transport	5	3.64964	7.83551e-05	ENSDARG00000056008, ENSDARG00000070083, ENSDARG00000009447, ENSDARG00000010149, ENSDARG00000014313	112	31	14912	21.4747	0.017014	0.00285599	0.0996224
GOTERM_BP_DIRECT	GO:0045214~sarcomere organization	4	2.91971	0.0015502	ENSDARG00000020610, ENSDARG00000019096, ENSDARG00000071090, ENSDARG00000032976	112	31	14912	17.1797	0.288057	0.0473777	1.95405
GOTERM_BP_DIRECT	GO:0015991~ATP hydrolysis coupled proton transport	4	2.91971	0.00398953	ENSDARG00000056008, ENSDARG00000070083, ENSDARG00000009447, ENSDARG00000010149	112	43	14912	12.3854	0.583328	0.103657	4.95774
GOTERM_BP_DIRECT	GO:0055114~oxidation-reduction process	12	8.75912	0.00615033	ENSDARG00000056108, ENSDARG00000043371, ENSDARG00000019644, ENSDARG00000074552, ENSDARG00000016160, ENSDARG00000010113, ENSDARG00000059128, ENSDARG00000028546, ENSDARG00000007745, ENSDARG00000038900, ENSDARG00000017772, ENSDARG00000006399	112	616	14912	2.59369	0.74104	0.139395	7.5474
GOTERM_BP_DIRECT	GO:0019752~carboxylic acid metabolic process	3	2.18978	0.00694243	ENSDARG00000043371, ENSDARG00000019644, ENSDARG00000017772	112	17	14912	23.4958	0.78253	0.141501	8.48031
GOTERM_BP_DIRECT	GO:0001666~response to hypoxia	4	2.91971	0.00717713	ENSDARG00000031952, ENSDARG00000032970, ENSDARG00000068940, ENSDARG00000054191	112	53	14912	10.0485	0.793501	0.133597	8.75506
GOTERM_BP_DIRECT	GO:0006094~gluconeogenesis	3	2.18978	0.00864495	ENSDARG00000040988, ENSDARG00000005423, ENSDARG00000057571	112	19	14912	21.0226	0.850652	0.14654	10.4562
GOTERM_BP_DIRECT	GO:0006413~translational initiation	4	2.91971	0.0092037	ENSDARG00000059654, ENSDARG00000017235, ENSDARG00000053047, ENSDARG00000012688	112	58	14912	9.18227	0.867999	0.14424	11.0961
GOTERM_BP_DIRECT	GO:0060047~heart contraction	4	2.91971	0.0110422	ENSDARG00000020610, ENSDARG00000019096, ENSDARG00000023963, ENSDARG00000032976	112	62	14912	8.58986	0.912112	0.159444	13.1718
GOTERM_BP_DIRECT	GO:0002181~cytoplasmic translation	3	2.18978	0.0125455	ENSDARG00000088030, ENSDARG00000051783, ENSDARG00000014867	112	23	14912	17.3665	0.937015	0.168333	14.8358
GOTERM_BP_DIRECT	GO:0006099~tricarboxylic acid cycle	3	2.18978	0.0136201	ENSDARG00000043371, ENSDARG00000038608, ENSDARG00000017772	112	24	14912	16.6429	0.950377	0.171142	16.0072
GOTERM_BP_DIRECT	GO:0006810~transport	16	11.6788	0.0187918	ENSDARG00000025566, ENSDARG00000092553, ENSDARG00000009447, ENSDARG00000022995, ENSDARG00000005513, ENSDARG00000010113, ENSDARG00000014313, ENSDARG00000056108, ENSDARG00000056008, ENSDARG00000031952, ENSDARG00000010149, ENSDARG00000026801, ENSDARG00000059128, ENSDARG00000007745, ENSDARG00000062359, ENSDARG00000023290	112	1120	14912	1.90204	0.984307	0.216815	21.44
GOTERM_BP_DIRECT	GO:0006414~translational elongation	3	2.18978	0.0195585	ENSDARG00000020850, ENSDARG00000044521, ENSDARG00000030053	112	29	14912	13.7734	0.986776	0.213623	22.2172
GOTERM_BP_DIRECT	GO:0055015~ventricular cardiac muscle cell development	2	1.45985	0.0221667	ENSDARG00000019096, ENSDARG00000032976	112	3	14912	88.7619	0.992621	0.227694	24.8086
GOTERM_BP_DIRECT	GO:0030239~myofibril assembly	3	2.18978	0.0278491	ENSDARG00000005513, ENSDARG00000037266, ENSDARG00000071090	112	35	14912	11.4122	0.997941	0.26602	30.1813
GOTERM_BP_DIRECT	GO:0044070~regulation of anion transport	2	1.45985	0.0294468	ENSDARG00000013623, ENSDARG00000003695	112	4	14912	66.5714	0.998564	0.267799	31.6269
GOTERM_BP_DIRECT	GO:0043456~regulation of pentose-phosphate shunt	2	1.45985	0.0294468	ENSDARG00000005423, ENSDARG00000057571	112	4	14912	66.5714	0.998564	0.267799	31.6269
GOTERM_BP_DIRECT	GO:0055005~ventricular cardiac myofibril assembly	2	1.45985	0.0294468	ENSDARG00000019096, ENSDARG00000032976	112	4	14912	66.5714	0.998564	0.267799	31.6269
GOTERM_BP_DIRECT	GO:0008152~metabolic process	8	5.83942	0.0369682	ENSDARG00000040988, ENSDARG00000060797, ENSDARG00000005423, ENSDARG00000005578, ENSDARG00000038900, ENSDARG00000021346, ENSDARG00000057571, ENSDARG00000021059	112	419	14912	2.54211	0.999739	0.312694	38.069
GOTERM_BP_DIRECT	GO:0006754~ATP biosynthetic process	2	1.45985	0.0580341	ENSDARG00000070083, ENSDARG00000010149	112	8	14912	33.2857	0.999998	0.434061	53.256
GOTERM_BP_DIRECT	GO:0006108~malate metabolic process	2	1.45985	0.0650495	ENSDARG00000043371, ENSDARG00000017772	112	9	14912	29.5873	1	0.45869	57.496
GOTERM_BP_DIRECT	GO:0048738~cardiac muscle tissue development	2	1.45985	0.0789255	ENSDARG00000019096, ENSDARG00000032976	112	11	14912	24.2078	1	0.513344	64.8579
GOTERM_BP_DIRECT	GO:0046034~ATP metabolic process	2	1.45985	0.0789255	ENSDARG00000070083, ENSDARG00000010149	112	11	14912	24.2078	1	0.513344	64.8579

## Sheet: module 14
Category	Term	Count	%	PValue	Genes	List Total	Pop Hits	Pop Total	Fold Enrichment	Bonferroni	Benjamini	FDR
GOTERM_BP_DIRECT	GO:0006096~glycolytic process	4	8.16327	0.00014686	ENSDARG00000012987, ENSDARG00000039914, ENSDARG00000028000, ENSDARG00000039452	45	35	14912	37.8717	0.0176144	0.0176144	0.168709
GOTERM_BP_DIRECT	GO:0006123~mitochondrial electron transport, cytochrome c to oxygen	3	6.12245	0.000757066	ENSDARG00000022438, ENSDARG00000068738, ENSDARG00000054588	45	14	14912	71.0095	0.0875661	0.044786	0.866916
GOTERM_BP_DIRECT	GO:0016579~protein deubiquitination	3	6.12245	0.0148274	ENSDARG00000079198, ENSDARG00000020107, ENSDARG00000074120	45	63	14912	15.7799	0.835944	0.452567	15.7802
GOTERM_BP_DIRECT	GO:0006511~ubiquitin-dependent protein catabolic process	3	6.12245	0.0396888	ENSDARG00000079198, ENSDARG00000020107, ENSDARG00000074120	45	107	14912	9.29097	0.992555	0.706261	37.2234
GOTERM_BP_DIRECT	GO:0009060~aerobic respiration	2	4.08163	0.0518291	ENSDARG00000022438, ENSDARG00000054588	45	18	14912	36.8198	0.998403	0.72416	45.7655
GOTERM_BP_DIRECT	GO:0015986~ATP synthesis coupled proton transport	2	4.08163	0.0740127	ENSDARG00000019404, ENSDARG00000045514	45	26	14912	25.4906	0.999909	0.787903	58.6883
