# Supplementary material for: Single-cell analysis uncovers that metabolic reprogramming by ErbB2 signaling is essential for cardiomyocyte proliferation in the regenerating heart
Source: eLife. 2019 Dec 23;8:e50163. doi: 10.7554/eLife.50163 (PMC7000220; doi:10.7554/eLife.50163)
Supplement: Figure 6—source data 1. [file elife-50163-fig6-data1.xlsx]

## Sheet: Sheet1
Gene	Forward Primer	Reverse Primer	species
gapdh	CGAGCTGTCTTCCCATCC	TCACCAACGTAGCTGTCTTTCTG	zebrafish
pdk2a	CCAATGTGCCTCATCACATC	TCTCGCATGCATTGGTAGAG	zebrafish
pkma	CATAGCTCGCAACACTGGAA	TTCGGATTTCTGGTCCTTTG	zebrafish
ldha	TCACCCGGTTTCTACTTTGG	GGTCATGTGGACGACATCTG	zebrafish
hk1	AAATGACACAGTGGGCACAA	GTTTCGCATTTCCTCCATGT	zebrafish
Slc16a3	TCACGGGTTTCTCCTACGC	GCCAAAGCGGTTCACACAC	mouse
Pfkp	GAAACATGAGGCGTTCTGTGT	CCCGGCACATTGTTGGAGA	mouse
Pdk3	TCCTGGACTTCGGAAGGGATA	GAAGGGCGGTTCAACAAGTTA	mouse
Pkm2	TCGCATGCAGCACCTGATT	CCTCGAATAGCTGCAAGTGGTA	mouse
Slc2a1	AACTGGGCAAGTCCTTTG	TTCTTCTCCCGCATCATCTG	mouse
Ldha	TGTCTCCAGCAAAGACTACTGT	GACTGTACTTGACAATGTTGGGA	mouse
mt-nd6	AATACCCGCAAACAAAGATCACCCAG	TGTTGGGGTTATGTTAGAGGGAGGGA	mouse
mt-nd1	CCCATTCGCGTTATTCTT	AAGTTGATCGTAACGGAAGC	mouse
mt-co2	AGTTGATAACCGAGTCGTTCTGCCA	TCGGCCTGGGATGGCATCAGT	mouse
mt-co1	CCAGTGCTAGCCGCAGGCAT	TCTGGGTGCCCAAAGAATCAGAACA	mouse
mt-co3	ACCTACCAAGGCCACCACACTCC	GCAGCCTCCTAGATCATGTGTTGGT	mouse
